# Supplementary material for: Supramolecular Assemblies in Pyridine- and Pyrazole-Based Coordination Compounds of Co(II) and Ni(II): Characterization, Hirshfeld Analysis and Theoretical Studies
Source: MDPI journal article supplement (doi:10.3390/cryst13020203), 2023-01-23
Supplement: s1 [file s1]

Archive with 4 entries (4 files):
- shelx.cif
- shelx.png
- shelx_cifreport.pdf
- shelx_tables.html
