# Supplementary material for: Supramolecular Assemblies in Pyridine- and Pyrazole-Based Coordination Compounds of Co(II) and Ni(II): Characterization, Hirshfeld Analysis and Theoretical Studies
Source: MDPI journal article supplement (doi:10.3390/cryst13020203), 2023-01-23
Supplement: s1 [file s1 › shelx.cif]

data_shelx
_audit_creation_date               2023-01-19
_audit_creation_method
;
Olex2 1.5
(compiled 2022.04.07 svn.rca3783a0 for OlexSys, GUI svn.r6498)
;
_shelx_SHELXL_version_number       '2019/1'
loop_
  _audit_author_name
  _audit_author_email
  _audit_author_address
 'Barcel'o-Oliver, M.' miquel.barcelo@uib.es
;
Universitat de les Illes Balears
Chemistry
carretera Valldemossa km7.5; Ed. Mateu Orfila
Palma de Mallorca
E07122
Spain
;

_audit_contact_author_address      ?
_audit_contact_author_email        ?
_audit_contact_author_name         ''
_audit_contact_author_phone        ?
_publ_contact_author_id_orcid      ?
_publ_section_references
;
Dolomanov, O.V., Bourhis, L.J., Gildea, R.J, Howard, J.A.K. & Puschmann, H.
 (2009), J. Appl. Cryst. 42, 339-341.

Sheldrick, G.M. (2008). Acta Cryst. A64, 112-122.

Sheldrick, G.M. (2015). Acta Cryst. A71, 3-8.
;
_chemical_name_common              ?
_chemical_name_systematic          ?
_chemical_formula_moiety           'C20 H36 Co N8 O2, 2(Cl)'
_chemical_formula_sum              'C20 H36 Cl2 Co N8 O2'
_chemical_formula_weight           550.40
_chemical_melting_point            ?
loop_
  _atom_type_symbol
  _atom_type_description
  _atom_type_scat_dispersion_real
  _atom_type_scat_dispersion_imag
  _atom_type_scat_source
 'C' 'C' 0.0181 0.0091 'International Tables Vol C Tables 4.2.6.8 and 6.1.1.4'
 'H' 'H' 0.0000 0.0000 'International Tables Vol C Tables 4.2.6.8 and 6.1.1.4'
 'Cl' 'Cl' 0.3639 0.7018 'International Tables Vol C Tables 4.2.6.8 and 6.1.1.4'
 'Co' 'Co' -2.3653 3.6143
 'International Tables Vol C Tables 4.2.6.8 and 6.1.1.4'
 'N' 'N' 0.0311 0.0180 'International Tables Vol C Tables 4.2.6.8 and 6.1.1.4'
 'O' 'O' 0.0492 0.0322 'International Tables Vol C Tables 4.2.6.8 and 6.1.1.4'

_shelx_space_group_comment
;
The symmetry employed for this shelxl refinement is uniquely defined
by the following loop, which should always be used as a source of
symmetry information in preference to the above space-group names.
They are only intended as comments.
;
_space_group_crystal_system        'monoclinic'
_space_group_IT_number             15
_space_group_name_H-M_alt          'C 1 2/c 1'
_space_group_name_Hall             '-C 2yc'
loop_
  _space_group_symop_operation_xyz
 'x, y, z'
 '-x, y, -z+1/2'
 'x+1/2, y+1/2, z'
 '-x+1/2, y+1/2, -z+1/2'
 '-x, -y, -z'
 'x, -y, z-1/2'
 '-x+1/2, -y+1/2, -z'
 'x+1/2, -y+1/2, z-1/2'

_cell_length_a                     10.4681(7)
_cell_length_b                     14.1306(10)
_cell_length_c                     18.4697(13)
_cell_angle_alpha                  90
_cell_angle_beta                   92.765(3)
_cell_angle_gamma                  90
_cell_volume                       2728.9(3)
_cell_formula_units_Z              4
_cell_measurement_reflns_used      9881
_cell_measurement_temperature      100(2)
_cell_measurement_theta_max        68.40
_cell_measurement_theta_min        5.26
_shelx_estimated_absorpt_T_max     0.640
_shelx_estimated_absorpt_T_min     0.321
_exptl_absorpt_coefficient_mu      6.991
_exptl_absorpt_correction_T_max    0.7531
_exptl_absorpt_correction_T_min    0.5504
_exptl_absorpt_correction_type     multi-scan
_exptl_absorpt_process_details
;
SADABS-2016/2 (Bruker,2016/2) was used for absorption correction.
wR2(int) was 0.1277 before and 0.0792 after correction.
The Ratio of minimum to maximum transmission is 0.7308.
The \l/2 correction factor is Not present.
;
_exptl_absorpt_special_details     ?
_exptl_crystal_colour              red
_exptl_crystal_colour_primary      red
_exptl_crystal_density_diffrn      1.340
_exptl_crystal_density_meas        ?
_exptl_crystal_density_method      ?
_exptl_crystal_description         block
_exptl_crystal_F_000               1156
_exptl_crystal_size_max            0.21
_exptl_crystal_size_mid            0.18
_exptl_crystal_size_min            0.07
_exptl_transmission_factor_max     ?
_exptl_transmission_factor_min     ?
_diffrn_reflns_av_R_equivalents    0.0518
_diffrn_reflns_av_unetI/netI       0.0227
_diffrn_reflns_Laue_measured_fraction_full  0.998
_diffrn_reflns_Laue_measured_fraction_max  0.997
_diffrn_reflns_limit_h_max         12
_diffrn_reflns_limit_h_min         -12
_diffrn_reflns_limit_k_max         16
_diffrn_reflns_limit_k_min         -16
_diffrn_reflns_limit_l_max         22
_diffrn_reflns_limit_l_min         -22
_diffrn_reflns_number              36237
_diffrn_reflns_point_group_measured_fraction_full  0.998
_diffrn_reflns_point_group_measured_fraction_max  0.997
_diffrn_reflns_theta_full          67.679
_diffrn_reflns_theta_max           68.409
_diffrn_reflns_theta_min           5.262
_diffrn_ambient_temperature        100.00
_diffrn_detector_area_resol_mean   ?
_diffrn_measured_fraction_theta_full  0.998
_diffrn_measured_fraction_theta_max  0.997
_diffrn_measurement_device_type    'Bruker D8 Venture'
_diffrn_measurement_method         '\f and \w scans'
_diffrn_radiation_monochromator    'multilayer'
_diffrn_radiation_type             'CuK\a'
_diffrn_radiation_wavelength       1.54178
_diffrn_source                     'high brilliance microfocus sealed tube'
_reflns_Friedel_coverage           0.000
_reflns_Friedel_fraction_full      .
_reflns_Friedel_fraction_max       .
_reflns_number_gt                  2466
_reflns_number_total               2504
_reflns_special_details
;
 Reflections were merged by SHELXL according to the crystal
 class for the calculation of statistics and refinement.
 
 _reflns_Friedel_fraction is defined as the number of unique
 Friedel pairs measured divided by the number that would be
 possible theoretically, ignoring centric projections and
 systematic absences.
;
_reflns_threshold_expression       'I > 2\s(I)'
_computing_cell_refinement         'Bruker Apex4, 2021'
_computing_data_collection         'Bruker Apex4, 2021'
_computing_data_reduction          'SAINT v8.40A (Bruker, 2019)'
_computing_molecular_graphics      'Olex2 1.5 (Dolomanov et al., 2009)'
_computing_publication_material    'Olex2 1.5 (Dolomanov et al., 2009)'
_computing_structure_refinement    'XL (Sheldrick, 2008)'
_computing_structure_solution      'XT (Sheldrick, 2015)'
_refine_diff_density_max           1.335
_refine_diff_density_min           -1.444
_refine_diff_density_rms           0.125
_refine_ls_extinction_coef         0.00053(12)
_refine_ls_extinction_expression  
 'Fc^*^=kFc[1+0.001xFc^2^\l^3^/sin(2\q)]^-1/4^'
_refine_ls_extinction_method       'SHELXL-2019/1 (Sheldrick 2019)'
_refine_ls_goodness_of_fit_ref     1.153
_refine_ls_hydrogen_treatment      mixed
_refine_ls_matrix_type             full
_refine_ls_number_parameters       170
_refine_ls_number_reflns           2504
_refine_ls_number_restraints       0
_refine_ls_R_factor_all            0.0772
_refine_ls_R_factor_gt             0.0758
_refine_ls_restrained_S_all        1.153
_refine_ls_shift/su_max            0.000
_refine_ls_shift/su_mean           0.000
_refine_ls_structure_factor_coef   Fsqd
_refine_ls_weighting_details      
 'w=1/[\s^2^(Fo^2^)+(0.0001P)^2^+52.6466P] where P=(Fo^2^+2Fc^2^)/3'
_refine_ls_weighting_scheme        calc
_refine_ls_wR_factor_gt            0.1799
_refine_ls_wR_factor_ref           0.1806
_refine_special_details            ?
_olex2_refinement_description
;
1. Fixed Uiso
 At 1.5 times of:
  All H(H) groups, All C(H) groups, All O(H) groups
2.a Aromatic/amide H refined with riding coordinates:
 N2(H2), N7(H7), C4(H4), C9(H9)
2.b Idealised Me refined as rotating group:
 C31(H31A,H31B,H31C), C51(H51A,H51B,H51C), C81(H81A,H81B,H81C), C101(H10A,H10B,
 H10C)
;
_atom_sites_solution_hydrogens     mixed
_atom_sites_solution_primary       dual
_atom_sites_solution_secondary     ?
loop_
  _atom_site_label
  _atom_site_type_symbol
  _atom_site_fract_x
  _atom_site_fract_y
  _atom_site_fract_z
  _atom_site_U_iso_or_equiv
  _atom_site_adp_type
  _atom_site_occupancy
  _atom_site_site_symmetry_order
  _atom_site_calc_flag
  _atom_site_refinement_flags_posn
  _atom_site_refinement_flags_adp
  _atom_site_refinement_flags_occupancy
  _atom_site_disorder_assembly
  _atom_site_disorder_group
 Co1 Co 0.500000 0.58562(9) 0.750000 0.0181(4) Uani 1 2 d S T P . .
 O1W O 0.500000 0.4387(4) 0.750000 0.0193(12) Uani 1 2 d S T P . .
 H1W H 0.421(6) 0.396(5) 0.754(3) 0.029 Uiso 1 1 d . U . . .
 O2W O 0.500000 0.7315(4) 0.750000 0.0303(14) Uani 1 2 d S T P . .
 H2W H 0.429(7) 0.767(6) 0.736(4) 0.045 Uiso 1 1 d . U . . .
 N1 N 0.3460(4) 0.5883(3) 0.6720(3) 0.0195(10) Uani 1 1 d . . . . .
 N2 N 0.2500(4) 0.5240(3) 0.6790(3) 0.0223(11) Uani 1 1 d . . . . .
 H2 H 0.245471 0.484910 0.715869 0.07(3) Uiso 1 1 calc R . . . .
 N6 N 0.6345(4) 0.5845(3) 0.6689(3) 0.0197(10) Uani 1 1 d . . . . .
 N7 N 0.7214(5) 0.6561(3) 0.6683(3) 0.0255(11) Uani 1 1 d . . . . .
 H7 H 0.735434 0.695783 0.704531 0.012(14) Uiso 1 1 calc R . . . .
 C3 C 0.1632(6) 0.5272(5) 0.6231(4) 0.0304(14) Uani 1 1 d . . . . .
 C4 C 0.2025(6) 0.5969(4) 0.5775(3) 0.0292(14) Uani 1 1 d . . . . .
 H4 H 0.160731 0.616441 0.533198 0.04(2) Uiso 1 1 calc R . . . .
 C5 C 0.3169(6) 0.6338(4) 0.6094(3) 0.0219(12) Uani 1 1 d . . . . .
 C8 C 0.7833(6) 0.6596(5) 0.6064(3) 0.0299(14) Uani 1 1 d . . . . .
 C9 C 0.7368(6) 0.5854(5) 0.5646(4) 0.0327(15) Uani 1 1 d . . . . .
 H9 H 0.762343 0.568104 0.517758 0.04(2) Uiso 1 1 calc R . . . .
 C10 C 0.6438(6) 0.5400(4) 0.6051(3) 0.0229(12) Uani 1 1 d . . . . .
 C31 C 0.0500(7) 0.4617(5) 0.6187(4) 0.046(2) Uani 1 1 d . . . . .
 H31A H 0.075458 0.399457 0.637894 0.069 Uiso 1 1 calc R U . . .
 H31B H 0.018914 0.455257 0.568081 0.08(3) Uiso 1 1 calc R . . . .
 H31C H -0.018143 0.487666 0.647396 0.126 Uiso 1 1 calc R U . . .
 C51 C 0.3963(6) 0.7117(4) 0.5815(3) 0.0259(13) Uani 1 1 d . . . . .
 H51A H 0.366402 0.772368 0.600131 0.039 Uiso 1 1 calc R U . . .
 H51B H 0.388867 0.712188 0.528454 0.036(19) Uiso 1 1 calc R . . . .
 H51C H 0.485870 0.701971 0.597671 0.055 Uiso 1 1 calc R U . . .
 C81 C 0.8828(8) 0.7339(5) 0.5939(5) 0.049(2) Uani 1 1 d . . . . .
 H81A H 0.857776 0.793486 0.616390 0.073 Uiso 1 1 calc R U . . .
 H81B H 0.889859 0.743532 0.541656 0.08(3) Uiso 1 1 calc R . . . .
 H81C H 0.965496 0.713197 0.615387 0.113 Uiso 1 1 calc R U . . .
 C101 C 0.5664(6) 0.4553(4) 0.5839(3) 0.0271(13) Uani 1 1 d . . . . .
 H10A H 0.604964 0.398873 0.606656 0.041 Uiso 1 1 calc R U . . .
 H10B H 0.564037 0.448160 0.531046 0.031(18) Uiso 1 1 calc R . . . .
 H10C H 0.479111 0.463178 0.599887 0.046 Uiso 1 1 calc R U . . .
 Cl1 Cl 0.24890(13) 0.83585(10) 0.72462(8) 0.0283(4) Uani 1 1 d . . . . .

loop_
  _atom_site_aniso_label
  _atom_site_aniso_U_11
  _atom_site_aniso_U_22
  _atom_site_aniso_U_33
  _atom_site_aniso_U_23
  _atom_site_aniso_U_13
  _atom_site_aniso_U_12
 Co1 0.0145(6) 0.0141(7) 0.0256(7) 0.000 -0.0006(5) 0.000
 O1W 0.016(3) 0.006(2) 0.037(3) 0.000 0.000(2) 0.000
 O2W 0.026(3) 0.020(3) 0.045(4) 0.000 -0.001(3) 0.000
 N1 0.020(2) 0.013(2) 0.026(2) 0.0000(18) 0.0009(19) 0.0005(19)
 N2 0.017(2) 0.018(2) 0.031(3) 0.005(2) -0.0038(19) -0.0033(19)
 N6 0.017(2) 0.014(2) 0.028(3) 0.0001(19) -0.0009(19) -0.0031(18)
 N7 0.026(3) 0.021(2) 0.030(3) -0.003(2) 0.003(2) -0.003(2)
 C3 0.025(3) 0.029(3) 0.036(3) 0.004(3) -0.010(3) -0.006(3)
 C4 0.031(3) 0.025(3) 0.030(3) 0.005(3) -0.010(3) -0.006(3)
 C5 0.025(3) 0.015(3) 0.025(3) 0.000(2) -0.002(2) 0.004(2)
 C8 0.028(3) 0.026(3) 0.036(3) 0.003(3) 0.009(3) -0.004(3)
 C9 0.039(4) 0.029(3) 0.030(3) 0.001(3) 0.010(3) 0.004(3)
 C10 0.024(3) 0.018(3) 0.026(3) 0.002(2) 0.001(2) 0.006(2)
 C31 0.035(4) 0.045(4) 0.056(5) 0.014(4) -0.018(3) -0.019(3)
 C51 0.032(3) 0.020(3) 0.026(3) 0.003(2) 0.002(2) -0.002(3)
 C81 0.055(5) 0.040(4) 0.055(5) -0.001(4) 0.030(4) -0.012(4)
 C101 0.033(3) 0.022(3) 0.026(3) -0.003(2) -0.004(3) 0.003(3)
 Cl1 0.0259(7) 0.0236(7) 0.0350(8) -0.0016(6) -0.0017(6) 0.0101(6)

_geom_special_details
;
 All esds (except the esd in the dihedral angle between two l.s. planes)
 are estimated using the full covariance matrix.  The cell esds are taken
 into account individually in the estimation of esds in distances, angles
 and torsion angles; correlations between esds in cell parameters are only
 used when they are defined by crystal symmetry.  An approximate (isotropic)
 treatment of cell esds is used for estimating esds involving l.s. planes.
;
loop_
  _geom_bond_atom_site_label_1
  _geom_bond_atom_site_label_2
  _geom_bond_distance
  _geom_bond_site_symmetry_2
  _geom_bond_publ_flag
 Co1 O1W 2.076(5) . ?
 Co1 O2W 2.062(6) . ?
 Co1 N1 2.110(5) 2_656 ?
 Co1 N1 2.110(5) . ?
 Co1 N6 2.105(5) . ?
 Co1 N6 2.105(5) 2_656 ?
 O1W H1W 1.03(7) . ?
 O2W H2W 0.92(7) . ?
 N1 N2 1.366(6) . ?
 N1 C5 1.345(7) . ?
 N2 H2 0.8800 . ?
 N2 C3 1.342(7) . ?
 N6 N7 1.361(6) . ?
 N6 C10 1.342(7) . ?
 N7 H7 0.8800 . ?
 N7 C8 1.343(8) . ?
 C3 C4 1.372(9) . ?
 C3 C31 1.502(9) . ?
 C4 H4 0.9500 . ?
 C4 C5 1.410(8) . ?
 C5 C51 1.486(8) . ?
 C8 C9 1.377(9) . ?
 C8 C81 1.504(9) . ?
 C9 H9 0.9500 . ?
 C9 C10 1.410(9) . ?
 C10 C101 1.488(8) . ?
 C31 H31A 0.9800 . ?
 C31 H31B 0.9800 . ?
 C31 H31C 0.9800 . ?
 C51 H51A 0.9800 . ?
 C51 H51B 0.9800 . ?
 C51 H51C 0.9800 . ?
 C81 H81A 0.9800 . ?
 C81 H81B 0.9800 . ?
 C81 H81C 0.9800 . ?
 C101 H10A 0.9800 . ?
 C101 H10B 0.9800 . ?
 C101 H10C 0.9800 . ?

loop_
  _geom_angle_atom_site_label_1
  _geom_angle_atom_site_label_2
  _geom_angle_atom_site_label_3
  _geom_angle
  _geom_angle_site_symmetry_1
  _geom_angle_site_symmetry_3
  _geom_angle_publ_flag
 O1W Co1 N1 91.03(13) . . ?
 O1W Co1 N1 91.03(12) . 2_656 ?
 O1W Co1 N6 89.57(13) . . ?
 O1W Co1 N6 89.57(13) . 2_656 ?
 O2W Co1 O1W 180.0 . . ?
 O2W Co1 N1 88.97(12) . . ?
 O2W Co1 N1 88.97(13) . 2_656 ?
 O2W Co1 N6 90.43(13) . 2_656 ?
 O2W Co1 N6 90.43(13) . . ?
 N1 Co1 N1 177.9(3) 2_656 . ?
 N6 Co1 N1 91.70(18) 2_656 2_656 ?
 N6 Co1 N1 88.31(18) . 2_656 ?
 N6 Co1 N1 91.70(18) . . ?
 N6 Co1 N1 88.32(18) 2_656 . ?
 N6 Co1 N6 179.1(3) . 2_656 ?
 Co1 O1W H1W 126(4) . . ?
 Co1 O2W H2W 123(5) . . ?
 N2 N1 Co1 117.8(3) . . ?
 C5 N1 Co1 136.8(4) . . ?
 C5 N1 N2 105.2(5) . . ?
 N1 N2 H2 123.9 . . ?
 C3 N2 N1 112.3(5) . . ?
 C3 N2 H2 123.9 . . ?
 N7 N6 Co1 118.1(4) . . ?
 C10 N6 Co1 135.0(4) . . ?
 C10 N6 N7 105.3(5) . . ?
 N6 N7 H7 123.7 . . ?
 C8 N7 N6 112.6(5) . . ?
 C8 N7 H7 123.7 . . ?
 N2 C3 C4 106.5(5) . . ?
 N2 C3 C31 121.6(6) . . ?
 C4 C3 C31 131.9(6) . . ?
 C3 C4 H4 126.8 . . ?
 C3 C4 C5 106.4(5) . . ?
 C5 C4 H4 126.8 . . ?
 N1 C5 C4 109.6(5) . . ?
 N1 C5 C51 123.0(5) . . ?
 C4 C5 C51 127.4(5) . . ?
 N7 C8 C9 106.1(5) . . ?
 N7 C8 C81 121.5(6) . . ?
 C9 C8 C81 132.4(6) . . ?
 C8 C9 H9 126.8 . . ?
 C8 C9 C10 106.5(6) . . ?
 C10 C9 H9 126.8 . . ?
 N6 C10 C9 109.5(5) . . ?
 N6 C10 C101 123.1(5) . . ?
 C9 C10 C101 127.3(6) . . ?
 C3 C31 H31A 109.5 . . ?
 C3 C31 H31B 109.5 . . ?
 C3 C31 H31C 109.5 . . ?
 H31A C31 H31B 109.5 . . ?
 H31A C31 H31C 109.5 . . ?
 H31B C31 H31C 109.5 . . ?
 C5 C51 H51A 109.5 . . ?
 C5 C51 H51B 109.5 . . ?
 C5 C51 H51C 109.5 . . ?
 H51A C51 H51B 109.5 . . ?
 H51A C51 H51C 109.5 . . ?
 H51B C51 H51C 109.5 . . ?
 C8 C81 H81A 109.5 . . ?
 C8 C81 H81B 109.5 . . ?
 C8 C81 H81C 109.5 . . ?
 H81A C81 H81B 109.5 . . ?
 H81A C81 H81C 109.5 . . ?
 H81B C81 H81C 109.5 . . ?
 C10 C101 H10A 109.5 . . ?
 C10 C101 H10B 109.5 . . ?
 C10 C101 H10C 109.5 . . ?
 H10A C101 H10B 109.5 . . ?
 H10A C101 H10C 109.5 . . ?
 H10B C101 H10C 109.5 . . ?

loop_
  _geom_torsion_atom_site_label_1
  _geom_torsion_atom_site_label_2
  _geom_torsion_atom_site_label_3
  _geom_torsion_atom_site_label_4
  _geom_torsion
  _geom_torsion_site_symmetry_1
  _geom_torsion_site_symmetry_2
  _geom_torsion_site_symmetry_3
  _geom_torsion_site_symmetry_4
  _geom_torsion_publ_flag
 Co1 N1 N2 C3 -174.7(4) . . . . ?
 Co1 N1 C5 C4 173.5(4) . . . . ?
 Co1 N1 C5 C51 -7.3(9) . . . . ?
 Co1 N6 N7 C8 -166.6(4) . . . . ?
 Co1 N6 C10 C9 164.0(4) . . . . ?
 Co1 N6 C10 C101 -16.6(9) . . . . ?
 N1 N2 C3 C4 -0.5(7) . . . . ?
 N1 N2 C3 C31 179.1(6) . . . . ?
 N2 N1 C5 C4 -0.2(6) . . . . ?
 N2 N1 C5 C51 178.9(5) . . . . ?
 N2 C3 C4 C5 0.4(7) . . . . ?
 N6 N7 C8 C9 -1.3(7) . . . . ?
 N6 N7 C8 C81 179.4(6) . . . . ?
 N7 N6 C10 C9 -0.5(6) . . . . ?
 N7 N6 C10 C101 178.8(5) . . . . ?
 N7 C8 C9 C10 0.9(7) . . . . ?
 C3 C4 C5 N1 -0.1(7) . . . . ?
 C3 C4 C5 C51 -179.2(6) . . . . ?
 C5 N1 N2 C3 0.5(6) . . . . ?
 C8 C9 C10 N6 -0.2(7) . . . . ?
 C8 C9 C10 C101 -179.5(6) . . . . ?
 C10 N6 N7 C8 1.1(6) . . . . ?
 C31 C3 C4 C5 -179.3(7) . . . . ?
 C81 C8 C9 C10 -179.9(7) . . . . ?

_shelx_res_file
;
TITL
    shelx.res
    created by SHELXL-2019/1 at 08:56:26 on 19-Jan-2023
CELL 1.54178 10.4681 14.1306 18.4697 90 92.765 90
ZERR 4 0.0007 0.001 0.0013 0 0.003 0
LATT 7
SYMM -X,+Y,0.5-Z
SFAC C H Cl Co N O
UNIT 80 144 8 4 32 8

L.S. 10
PLAN  5
SIZE 0.07 0.18 0.21
TEMP -173.15
CONF
LIST 4
MORE -1
BOND $H
fmap 2
acta
OMIT -6 6 3
OMIT -6 6 1
REM <olex2.extras>
REM <HklSrc "%.\\shelx.hkl">
REM </olex2.extras>

WGHT    0.000100   52.646599
EXTI    0.000535
FVAR       0.36127
CO1   4    0.500000    0.585615    0.750000    10.50000    0.01448    0.01414 =
         0.02563    0.00000   -0.00060    0.00000
O1W   6    0.500000    0.438702    0.750000    10.50000    0.01554    0.00560 =
         0.03669    0.00000    0.00018    0.00000
H1W   2    0.421378    0.395766    0.754371    11.00000   -1.50000
O2W   6    0.500000    0.731541    0.750000    10.50000    0.02583    0.02012 =
         0.04473    0.00000   -0.00063    0.00000
H2W   2    0.429494    0.766887    0.736050    11.00000   -1.50000
N1    5    0.345982    0.588299    0.672041    11.00000    0.01983    0.01275 =
         0.02580   -0.00002    0.00088    0.00049
N2    5    0.249950    0.523979    0.678975    11.00000    0.01735    0.01773 =
         0.03126    0.00456   -0.00377   -0.00332
AFIX  43
H2    2    0.245471    0.484910    0.715869    11.00000    0.06501
AFIX   0
N6    5    0.634477    0.584502    0.668882    11.00000    0.01715    0.01430 =
         0.02753    0.00011   -0.00091   -0.00308
N7    5    0.721386    0.656112    0.668290    11.00000    0.02592    0.02104 =
         0.02973   -0.00316    0.00262   -0.00275
AFIX  43
H7    2    0.735434    0.695783    0.704531    11.00000    0.01214
AFIX   0
C3    1    0.163207    0.527156    0.623109    11.00000    0.02527    0.02912 =
         0.03578    0.00363   -0.00978   -0.00624
C4    1    0.202453    0.596897    0.577515    11.00000    0.03142    0.02525 =
         0.02978    0.00451   -0.01006   -0.00577
AFIX  43
H4    2    0.160731    0.616441    0.533198    11.00000    0.03926
AFIX   0
C5    1    0.316941    0.633828    0.609431    11.00000    0.02538    0.01478 =
         0.02518    0.00049   -0.00203    0.00380
C8    1    0.783340    0.659602    0.606361    11.00000    0.02847    0.02627 =
         0.03579    0.00330    0.00905   -0.00427
C9    1    0.736825    0.585374    0.564624    11.00000    0.03943    0.02928 =
         0.03015    0.00081    0.01039    0.00434
AFIX  43
H9    2    0.762343    0.568104    0.517758    11.00000    0.03934
AFIX   0
C10   1    0.643834    0.540028    0.605149    11.00000    0.02429    0.01846 =
         0.02584    0.00223    0.00083    0.00552
C31   1    0.050022    0.461695    0.618740    11.00000    0.03489    0.04506 =
         0.05555    0.01383   -0.01779   -0.01915
AFIX 137
H31A  2    0.075458    0.399457    0.637894    11.00000   -1.50000
H31B  2    0.018914    0.455257    0.568081    11.00000    0.08404
H31C  2   -0.018143    0.487666    0.647396    11.00000   -1.50000
AFIX   0
C51   1    0.396271    0.711717    0.581549    11.00000    0.03224    0.01977 =
         0.02568    0.00346    0.00160   -0.00159
AFIX 137
H51A  2    0.366402    0.772368    0.600131    11.00000   -1.50000
H51B  2    0.388867    0.712188    0.528454    11.00000    0.03639
H51C  2    0.485870    0.701971    0.597671    11.00000   -1.50000
AFIX   0
C81   1    0.882784    0.733932    0.593859    11.00000    0.05452    0.03971 =
         0.05516   -0.00134    0.02979   -0.01226
AFIX 137
H81A  2    0.857776    0.793486    0.616390    11.00000   -1.50000
H81B  2    0.889859    0.743532    0.541656    11.00000    0.07555
H81C  2    0.965496    0.713197    0.615387    11.00000   -1.50000
AFIX   0
C101  1    0.566378    0.455333    0.583869    11.00000    0.03276    0.02192 =
         0.02607   -0.00313   -0.00405    0.00313
AFIX 137
H10A  2    0.604964    0.398873    0.606656    11.00000   -1.50000
H10B  2    0.564037    0.448160    0.531046    11.00000    0.03060
H10C  2    0.479111    0.463178    0.599887    11.00000   -1.50000
AFIX   0

CL1   3    0.248897    0.835849    0.724622    11.00000    0.02589    0.02365 =
         0.03498   -0.00162   -0.00171    0.01006
HKLF 4


REM
REM wR2 = 0.1806, GooF = S = 1.153, Restrained GooF = 1.153 for all data
REM R1 = 0.0758 for 2466 Fo > 4sig(Fo) and 0.0772 for all 2504 data
REM 170 parameters refined using 0 restraints

END

WGHT      0.0001     52.6610

REM Highest difference peak  1.335,  deepest hole -1.444,  1-sigma level  0.125
Q1    1   0.4201  0.2424  0.7502  11.00000  0.05    1.33
Q2    1   0.3356  0.4947  0.7232  11.00000  0.05    0.90
Q3    1   0.3316  0.5807  0.7508  11.00000  0.05    0.86
Q4    1   0.1598  0.4920  0.7252  11.00000  0.05    0.81
Q5    1   1.0000  0.6793  0.7500  10.50000  0.05    0.72
;
_shelx_res_checksum                20868
_shelx_hkl_file
;
   2   0   0 2565.94  159.18
  -4   0   0 3899.01  258.97
  -4   0   0 4636.04  259.07
   4   0   0 3706.23  258.57
  -4   0   0 4475.75  259.27
  -4   0   0 4173.18  258.87
  -6   0   0    7.60    3.20
  -6   0   0    9.10    2.80
   6   0   0    8.30    2.10
   6   0   0    5.20    2.00
   6   0   0    7.80    1.90
   6   0   0   10.10    3.60
  -6   0   0    5.80    2.50
  -8   0   0 2232.08  154.08
  -8   0   0 2468.35  155.58
  -8   0   0 2681.33  156.38
  -8   0   0 2639.74  155.38
  -8   0   0 2362.66  154.88
  -8   0   0 2757.92  155.98
  -8   0   0 2306.57  154.68
  -8   0   0 2612.24  155.28
  -8   0   0 2667.43  154.88
   8   0   0 2262.17  154.08
   8   0   0 2354.06  154.58
   8   0   0 2111.19  154.18
   8   0   0 2494.95  156.38
   8   0   0 2828.32  155.58
 -10   0   0   75.39    6.50
 -10   0   0   70.59    7.30
 -10   0   0   82.19    6.70
 -10   0   0   90.49    6.60
 -10   0   0   74.09    7.10
  10   0   0   74.79    6.00
 -10   0   0   62.29    7.40
 -10   0   0   66.99    7.20
 -10   0   0   79.29    6.70
  10   0   0   87.19    5.80
  10   0   0   68.59    5.80
  10   0   0   80.69    6.90
 -12   0   0  601.44   37.20
  12   0   0  645.24   36.90
 -12   0   0  628.44   37.40
 -12   0   0  628.14   37.30
 -12   0   0  547.35   37.40
 -12   0   0  496.95   37.20
  12   0   0  580.14   37.00
   1   1   0 4015.70  249.58
  -3  -1   0   22.20    3.90
  -3  -1   0   23.30    2.60
   3  -1   0   25.30    2.30
  -3  -1   0   27.20    3.00
  -3  -1   0   30.10    2.50
   3  -1   0   21.30    2.30
  -3  -1   0   30.40    2.80
   3   1   0   24.40    2.80
  -3   1   0   31.70    3.30
   3   1   0   23.50    3.70
  -3   1   0   20.70    2.40
  -5  -1   0  241.58   14.20
  -5  -1   0  230.68   13.80
   5  -1   0  211.68   14.20
  -5  -1   0  199.28   13.90
   5  -1   0  180.18   13.10
   5  -1   0  208.38   13.70
   5   1   0  203.28   14.00
  -5   1   0  195.68   13.80
  -5   1   0  229.08   14.40
   5   1   0  202.58   14.80
   5   1   0  179.48   13.40
  -7  -1   0 1110.69   63.29
  -7  -1   0  973.60   61.99
   7  -1   0  959.30   62.29
  -7  -1   0 1035.80   61.29
   7  -1   0 1015.00   61.59
  -7  -1   0  946.01   62.89
  -7  -1   0 1084.49   61.79
   7  -1   0  811.32   60.39
   7  -1   0  843.02   60.69
  -7  -1   0  996.30   62.49
   7   1   0  973.20   61.69
  -7   1   0  897.81   61.29
  -7   1   0  904.21   61.09
  -7   1   0 1035.40   62.19
  -7   1   0 1050.09   62.09
   7   1   0  895.11   60.99
  -7   1   0 1031.40   61.29
  -7   1   0  876.71   60.69
  -7   1   0 1005.90   61.59
  -7   1   0 1080.59   62.79
   7   1   0  917.21   60.69
  -7   1   0  954.10   61.69
  -9  -1   0  246.88   19.20
   9  -1   0  256.07   17.50
  -9  -1   0  269.07   18.20
   9  -1   0  279.07   19.10
  -9  -1   0  265.17   19.30
   9  -1   0  256.87   17.80
  -9  -1   0  263.57   18.80
  -9  -1   0  249.08   18.90
   9  -1   0  282.77   20.70
  -9  -1   0  276.77   18.20
   9  -1   0  258.37   18.10
   9   1   0  276.17   17.60
  -9   1   0  304.97   20.00
   9   1   0  267.27   18.30
  -9   1   0  270.97   17.60
  -9   1   0  266.27   18.70
   9   1   0  270.07   17.60
  -9   1   0  298.27   19.30
  -9   1   0  282.87   18.40
  -9   1   0  279.67   18.30
   9   1   0  298.57   21.10
  -9   1   0  269.47   18.80
   9   1   0  270.67   17.50
  -9   1   0  280.37   18.10
  -9   1   0  255.67   18.40
   9   1   0  262.37   19.20
  -9   1   0  255.57   18.70
  11  -1   0   36.40    3.70
  11  -1   0   36.20    5.60
  11  -1   0   29.60    3.40
  11  -1   0   34.30    3.60
 -11  -1   0   30.80    3.90
 -11  -1   0   29.90    5.00
 -11  -1   0   32.70    3.90
  11  -1   0   32.70    4.70
 -11  -1   0   30.70    4.00
 -11  -1   0   34.80    3.80
 -11  -1   0   31.40    4.60
 -11  -1   0   28.60    4.30
 -11   1   0   34.10    3.90
  11   1   0   31.60    3.10
 -11   1   0   31.30    4.60
  11   1   0   27.10    4.80
  11   1   0   29.30    3.50
 -11   1   0   27.80    4.10
 -11   1   0   31.90    4.20
 -11   1   0   33.40    4.10
 -11   1   0   29.20    7.10
  11   1   0   26.40    3.60
 -11   1   0   32.10    3.90
  11   1   0   28.00    4.20
   0  -2   0 2077.19  131.59
   0  -2   0 2185.28  131.69
   0  -2   0 2112.49  131.69
  -2  -2   0  353.26   22.70
  -2  -2   0  356.16   23.10
  -2   2   0  376.56   22.80
   2   2   0  338.07   22.60
  -4  -2   0   74.09    5.20
  -4  -2   0   58.39    5.80
  -4  -2   0   56.09    5.10
  -4  -2   0   75.99    5.00
   4  -2   0   58.99    4.60
  -4  -2   0   73.29    5.70
  -4  -2   0   55.79    5.40
  -4   2   0   68.09    5.00
  -4   2   0   64.69    5.30
  -4   2   0   57.19    4.90
  -4   2   0   68.79    5.80
   4   2   0   66.69    5.30
   4   2   0   65.99    4.90
   6  -2   0  979.40   62.49
  -6  -2   0 1113.69   62.19
  -6  -2   0  961.00   62.29
   6  -2   0  832.22   61.39
  -6  -2   0 1136.59   62.59
  -6  -2   0 1107.19   62.89
   6  -2   0  993.40   61.99
  -6   2   0 1000.80   62.29
  -6   2   0 1027.80   62.19
   6   2   0  984.30   62.39
  -6   2   0  980.50   62.09
   6   2   0  872.31   61.79
   6   2   0  853.51   61.39
  -8  -2   0   22.10    4.40
  -8  -2   0   15.90    3.40
  -8  -2   0   17.90    3.70
  -8  -2   0   23.00    5.80
   8  -2   0   17.00    3.10
   8  -2   0   17.20    2.60
  -8  -2   0   16.00    4.20
  -8  -2   0   17.50    4.70
  -8  -2   0   27.60    6.30
   8  -2   0   21.60    3.80
   8   2   0   16.50    2.80
  -8   2   0   17.40    3.90
  -8   2   0   25.50    4.40
  -8   2   0   21.90    5.20
  -8   2   0   23.10    3.70
  -8   2   0   19.70    4.60
  -8   2   0   14.30    2.60
   8   2   0   19.50    2.80
  -8   2   0   22.50    4.50
  -8   2   0   24.60    5.20
   8   2   0   15.30    4.90
   8   2   0   20.80    4.30
  -8   2   0   20.00    4.10
   8   2   0   20.30    2.70
   8   2   0   22.20    3.80
 -10  -2   0  104.09    7.50
 -10  -2   0  100.29    8.60
 -10  -2   0   95.59    8.80
  10  -2   0  113.09   10.80
  10  -2   0   85.89    7.80
  10  -2   0   88.89    6.90
 -10  -2   0   99.19    7.70
 -10  -2   0   98.79    8.40
 -10  -2   0   86.19    7.50
 -10  -2   0  100.19    9.20
 -10  -2   0   96.59    7.60
  10  -2   0   87.49    6.90
 -10   2   0  100.79    9.00
  10   2   0   90.89    6.90
 -10   2   0   85.19    8.20
  10   2   0   94.99    7.20
  10   2   0  101.59    7.20
 -10   2   0   93.59    8.20
 -10   2   0  101.79    7.80
 -10   2   0  102.79    7.70
  10   2   0   96.19    8.00
  10   2   0   89.69   11.60
 -10   2   0  105.19    7.60
 -12  -2   0   22.40    2.80
 -12  -2   0   19.20    2.80
  12  -2   0   26.60    2.70
 -12  -2   0   19.40    3.10
 -12  -2   0   16.80    2.80
  12  -2   0   23.70    2.20
  12  -2   0   22.30    2.60
  12   2   0   22.30    2.60
 -12   2   0   27.00    3.00
 -12   2   0   19.20    3.00
  12   2   0   19.80    3.50
 -12   2   0   19.70    3.00
  12   2   0   22.10    2.40
 -12   2   0   23.40    3.10
  12   2   0   29.40    3.80
  -1  -3   0  136.59    9.40
  -1  -3   0  125.49    9.80
   1   3   0  139.19    9.30
   1   3   0  131.59    9.50
  -1   3   0  146.19    9.40
   1   3   0  159.78    9.10
  -3  -3   0   74.79    6.80
  -3  -3   0   70.39    5.90
  -3  -3   0   74.69    6.10
  -3  -3   0   82.89    5.80
  -3  -3   0   84.79    5.60
  -3  -3   0   71.79    6.00
  -3   3   0   82.09    5.60
   3   3   0   77.29    6.00
  -3   3   0   84.99    6.40
  -3   3   0   81.59    5.60
   3   3   0   80.59    6.50
  -3   3   0   76.49    5.70
   3   3   0   83.19    5.80
  -5  -3   0  110.59    8.30
  -5  -3   0  127.09    8.10
  -5  -3   0  111.29    8.80
  -5  -3   0  121.49    8.40
   5  -3   0  116.89    7.60
  -5  -3   0  104.49    9.40
  -5  -3   0   99.49    8.10
  -5   3   0  102.69    7.90
   5   3   0  106.09    8.40
  -5   3   0  117.69    8.10
   5   3   0  100.09    9.10
   5   3   0  103.59    7.40
   5   3   0  105.19    7.90
  -5   3   0  118.29    8.20
  -5   3   0  130.39    9.20
   7  -3   0  156.48   10.90
   7  -3   0  147.89   11.70
  -7   3   0  155.48   10.40
   7   3   0  136.39   10.80
  -7   3   0  150.38   12.10
  -7   3   0  145.99   10.40
  -7   3   0  160.18   11.00
   7   3   0  160.58   10.30
  -7   3   0  137.79   11.10
   7   3   0  176.08   11.80
  -7   3   0  167.28   11.30
  -7   3   0  159.08   11.20
  -7   3   0  164.98   10.60
   7   3   0  131.29   10.20
   7   3   0  140.39   12.70
  -7   3   0  166.88   11.00
  -7   3   0  146.19   11.40
  -9  -3   0    2.80    3.70
  -9  -3   0    7.80    2.80
  -9  -3   0   -2.10    3.90
  -9  -3   0    7.30    3.80
   9  -3   0    7.30    1.70
  -9  -3   0    4.10    2.90
   9  -3   0    6.90    4.20
  -9  -3   0    5.20    3.70
   9  -3   0    5.40    3.10
  -9  -3   0    4.50    1.80
   9  -3   0    8.80    2.40
  -9   3   0    4.80    2.80
   9   3   0    4.00    2.70
  -9   3   0    5.90    3.30
  -9   3   0    5.00    2.60
  -9   3   0    7.00    2.40
  -9   3   0    2.70    2.90
   9   3   0    4.80    2.20
  -9   3   0    4.50    2.60
   9   3   0   12.30    5.20
  -9   3   0    8.10    2.20
   9   3   0    8.00    2.00
  -9   3   0    7.50    3.00
   9   3   0    4.70    3.80
   9   3   0    7.40    2.10
   9   3   0    6.40    3.70
  -9   3   0    0.40    3.10
  11  -3   0    4.10    3.40
 -11  -3   0    4.70    2.40
  11  -3   0    4.00    1.90
 -11  -3   0    4.60    2.40
 -11  -3   0   -0.40    5.90
 -11  -3   0   10.10    4.00
  11  -3   0    2.90    2.60
 -11  -3   0    7.70    4.60
 -11  -3   0    6.10    2.70
 -11  -3   0    4.90    3.20
  11  -3   0    6.70    1.80
  11   3   0    4.10    2.20
  11   3   0    5.70    2.00
 -11   3   0    8.00    4.10
  11   3   0    9.80    3.40
 -11   3   0    4.70    2.60
 -11   3   0    9.50    3.60
  11   3   0    2.40    1.90
 -11   3   0    3.40    2.40
 -11   3   0    5.80    2.20
 -11   3   0    8.10    2.90
   0  -4   0  740.63   46.20
   0  -4   0  740.43   45.90
   0   4   0  644.54   45.90
   0   4   0  848.22   46.30
   0   4   0  698.03   45.70
  -2  -4   0 2400.06  142.99
  -2  -4   0 2186.98  142.99
  -2  -4   0 2325.87  143.69
  -2  -4   0 2188.18  142.99
  -2  -4   0 2491.55  143.29
  -2  -4   0 2355.46  142.79
   2   4   0 2332.67  142.99
  -2   4   0 2096.79  142.79
   2   4   0 2526.95  142.79
  -2   4   0 2361.66  143.29
  -2   4   0 2189.88  142.69
   2   4   0 2167.98  143.29
  -4  -4   0 1161.58   71.79
  -4  -4   0 1244.28   71.39
  -4  -4   0 1243.58   71.99
  -4  -4   0  957.50   71.99
  -4  -4   0 1248.88   71.69
  -4  -4   0 1147.69   71.79
  -4  -4   0 1100.79   72.39
  -4   4   0 1125.99   71.29
   4   4   0 1120.49   71.69
   4   4   0 1069.39   72.19
   4   4   0 1105.09   70.99
  -4   4   0 1083.99   71.39
   4   4   0 1117.09   71.29
  -4   4   0 1144.19   71.29
  -4   4   0 1269.27   72.39
  -6  -4   0   57.99    6.00
  -6  -4   0   57.49    5.40
   6  -4   0   44.90    4.00
  -6  -4   0   52.39    5.10
  -6   4   0   43.90    5.70
  -6   4   0   50.89    4.40
  -6   4   0   38.30    4.30
  -6   4   0   53.99    5.60
  -6   4   0   44.50    5.10
   6   4   0   43.70    3.70
  -6   4   0   47.20    4.40
   6   4   0   37.50    4.30
   6   4   0   42.50    5.00
  -6   4   0   40.90    4.50
  -6   4   0   39.70    3.90
  -6   4   0   46.30    4.50
   6   4   0   44.10    3.70
  -6   4   0   46.80    4.40
   6   4   0   42.20    6.20
   8  -4   0  200.88   14.40
  -8   4   0  211.58   15.10
   8   4   0  218.28   14.60
  -8   4   0  185.38   14.50
  -8   4   0  215.58   14.40
   8   4   0  197.08   13.70
  -8   4   0  189.28   14.50
  -8   4   0  191.18   13.70
  -8   4   0  202.38   14.50
   8   4   0  205.78   13.70
  -8   4   0  201.58   14.50
   8   4   0  243.78   17.80
   8   4   0  191.38   13.50
  -8   4   0  231.28   14.40
  -8   4   0  184.58   13.80
  -8   4   0  212.18   15.90
  -8   4   0  221.38   13.80
 -10  -4   0   80.39    6.30
  10  -4   0   74.79    6.50
 -10   4   0   63.99    6.60
  10   4   0   69.69    5.60
 -10   4   0   64.39    6.80
 -10   4   0   81.19    6.80
 -10   4   0   77.29    6.30
 -10   4   0   83.99    5.90
 -10   4   0   77.59    6.50
  10   4   0   75.19    5.90
 -10   4   0   73.39    7.50
 -10   4   0   66.99    6.40
 -12  -4   0   52.89    4.40
 -12  -4   0   67.79    4.60
 -12   4   0   56.59    4.60
 -12   4   0   52.29    4.70
  12   4   0   53.19    4.20
  12   4   0   47.00    4.10
  12   4   0   58.79    4.40
  -1  -5   0 1306.17   92.69
  -1  -5   0 1395.16   92.69
   1  -5   0 1507.85   92.69
  -1  -5   0 1504.45   92.69
  -1  -5   0 1569.24   93.49
  -1  -5   0 1557.94   92.99
   1  -5   0 1522.05   92.79
   1  -5   0 1565.54   92.59
   1   5   0 1690.13   93.59
  -1   5   0 1375.86   92.49
   1   5   0 1383.66   92.59
  -1   5   0 1619.74   93.09
  -1   5   0 1369.26   92.69
  -3  -5   0   34.20    3.80
  -3  -5   0   31.90    5.00
  -3  -5   0   38.30    4.10
  -3  -5   0   46.00    4.40
  -3  -5   0   31.90    4.00
  -3  -5   0   39.30    4.80
  -3  -5   0   31.20    3.70
   3   5   0   45.10    3.80
  -3   5   0   35.60    3.10
   3   5   0   31.60    3.40
  -3   5   0   40.30    4.20
   3   5   0   31.30    4.50
   3   5   0   33.90    3.90
  -3   5   0   35.70    3.40
  -3   5   0   37.40    3.20
  -5  -5   0  310.07   20.20
  -5  -5   0  333.77   20.40
  -5  -5   0  302.77   20.90
  -5  -5   0  298.47   22.00
  -5  -5   0  331.47   20.80
  -5  -5   0  314.67   21.00
  -5  -5   0  320.27   21.20
  -5  -5   0  317.37   19.80
  -5  -5   0  298.37   20.60
   5   5   0  305.97   19.90
   5   5   0  299.27   21.70
  -5   5   0  341.57   21.80
   5   5   0  308.67   20.30
   5   5   0  322.37   20.90
  -5   5   0  314.07   20.20
  -5   5   0  329.37   20.30
  -5   5   0  301.27   20.30
   5   5   0  282.97   20.40
  -7  -5   0  825.12   50.79
   7  -5   0  849.22   49.80
  -7  -5   0  780.62   50.19
  -7  -5   0  709.03   49.90
  -7  -5   0  775.32   50.49
  -7  -5   0  825.52   51.39
  -7   5   0  868.71   49.70
   7   5   0  754.62   49.99
  -7   5   0  835.12   50.19
  -7   5   0  791.42   50.09
  -7   5   0  874.21   50.09
  -7   5   0  767.02   50.09
  -7   5   0  829.02   50.69
   7   5   0  804.82   50.89
  -7   5   0  748.43   50.09
  -7   5   0  746.13   49.80
   7   5   0  741.63   49.40
  -7   5   0  833.62   50.09
  -7   5   0  792.62   51.19
   7   5   0  744.83   51.99
  -7   5   0  738.73   49.90
   7   5   0  806.62   49.40
  -7   5   0  787.42   49.60
  -7   5   0  781.32   49.70
   7   5   0  741.83   49.40
   7   5   0  754.32   50.29
   9  -5   0    1.20    2.40
  -9  -5   0    0.90    2.00
   9  -5   0    2.30    4.00
  -9  -5   0    8.00    4.40
  -9  -5   0    4.20    3.00
  -9  -5   0   11.80    5.30
  -9  -5   0    4.50    3.50
  -9  -5   0    6.00    3.10
  -9  -5   0    8.00    2.70
  -9   5   0    4.20    3.20
   9   5   0    3.40    6.00
  -9   5   0    8.00    2.30
  -9   5   0    5.60    3.20
  -9   5   0    4.50    2.50
   9   5   0    2.70    1.80
  -9   5   0    2.20    2.20
  -9   5   0    5.70    3.00
  -9   5   0    7.50    2.60
  -9   5   0    3.70    3.30
   9   5   0    6.70    2.30
   9   5   0    6.20    2.10
   9   5   0    4.80    3.00
  -9   5   0    3.50    1.80
  11  -5   0   29.40    3.10
 -11  -5   0   27.40    3.40
 -11  -5   0   30.40    3.70
 -11  -5   0   46.90    6.90
 -11  -5   0   28.70    4.00
 -11  -5   0   40.80    4.80
 -11   5   0   23.10    3.10
  11   5   0   28.50    3.40
  11   5   0   33.50    3.30
 -11   5   0   33.90    3.80
  11   5   0   30.20    3.40
  11   5   0   32.60    4.40
 -11   5   0   25.80    3.50
   0  -6   0  697.23   40.80
   0  -6   0  652.63   40.40
   0  -6   0  603.74   40.50
   0  -6   0  673.93   41.30
   0   6   0  593.74   40.20
  -2  -6   0 5410.76  326.77
  -2  -6   0 5192.58  327.87
  -2  -6   0 4918.61  326.97
   2  -6   0 5177.08  326.47
  -2  -6   0 5668.73  326.77
  -2  -6   0 5263.37  326.77
  -2  -6   0 4985.40  326.77
  -2  -6   0 5323.67  326.57
  -2  -6   0 5814.42  327.27
  -2   6   0 4835.52  326.67
   2   6   0 5298.77  326.67
   2   6   0 5500.25  327.27
  -2   6   0 5492.45  327.27
  -2   6   0 4924.01  326.47
  -4  -6   0  647.24   40.30
  -4  -6   0  627.14   39.70
  -4  -6   0  618.04   40.20
  -4  -6   0  621.54   41.20
  -4  -6   0  632.04   39.10
  -4  -6   0  655.93   39.60
  -4  -6   0  672.23   40.00
  -4  -6   0  602.94   40.00
  -4   6   0  687.33   40.80
  -4   6   0  581.64   39.50
   4   6   0  671.93   39.10
   4   6   0  579.44   40.60
  -4   6   0  551.64   39.30
   4   6   0  667.83   39.60
  -4   6   0  562.84   39.30
  -6  -6   0 2198.68  139.99
  -6  -6   0 2194.18  140.09
  -6  -6   0 2372.36  140.69
  -6  -6   0 2227.58  139.99
  -6  -6   0 2270.87  139.59
  -6   6   0 2405.86  139.29
  -6   6   0 2238.38  139.49
  -6   6   0 2069.09  139.49
  -6   6   0 2423.86  139.49
  -6   6   0 2189.38  139.29
   6   6   0 2307.87  141.69
  -6   6   0 2229.98  139.39
  -6   6   0 2210.48  139.39
  -6   6   0 2454.15  141.49
  -6   6   0 1984.00  139.39
   6   6   0 2304.87  138.99
  -6   6   0 2217.98  139.69
  -6   6   0 2213.98  139.29
   6   6   0 2193.28  139.69
   6   6   0 2180.68  139.49
   6   6   0 2213.58  138.89
  -6   6   0 1901.71  138.99
  -6   6   0 2407.86  140.59
  -6   6   0 2352.46  140.09
   6   6   0 2225.08  138.89
  -6   6   0 2211.58  139.59
  -8  -6   0   35.50    5.10
  -8  -6   0   37.40    6.70
  -8  -6   0   30.70    5.30
  -8  -6   0   32.40    4.20
  -8  -6   0   42.40    6.20
  -8   6   0   38.60    4.80
   8   6   0   41.10    4.00
  -8   6   0   40.60    5.30
   8   6   0   38.30    3.60
  -8   6   0   43.70    4.20
  -8   6   0   42.50    4.70
   8   6   0   42.80    8.30
   8   6   0   32.00    4.80
  -8   6   0   42.90    4.00
   8   6   0   44.20    4.10
  -8   6   0   47.70    5.90
  -8   6   0   45.50    5.00
 -10  -6   0  473.95   32.60
 -10  -6   0  498.25   33.60
 -10  -6   0  435.96   33.70
  10  -6   0  485.55   32.50
 -10  -6   0  558.94   33.70
 -10  -6   0  522.05   33.70
 -10   6   0  443.26   32.30
 -10   6   0  517.35   33.80
 -10   6   0  487.65   32.90
 -10   6   0  550.94   32.80
 -10   6   0  514.15   32.60
  10   6   0  497.75   33.00
  10   6   0  530.15   32.10
 -10   6   0  535.75   32.30
  10   6   0  519.35   32.20
  10   6   0  522.35   32.30
 -10   6   0  558.24   32.90
   1  -7   0 2136.49  129.39
  -1  -7   0 2136.89  130.59
  -1  -7   0 2114.39  129.79
   1  -7   0 2017.40  129.09
   1  -7   0 2230.18  129.99
  -1  -7   0 1890.51  129.29
  -1  -7   0 2065.19  129.29
   1  -7   0 2023.80  129.29
  -1  -7   0 1970.20  129.49
   1   7   0 1897.71  129.09
   1   7   0 2355.76  130.39
  -1   7   0 2108.09  129.89
  -3  -7   0  246.78   17.70
  -3  -7   0  265.37   17.70
  -3  -7   0  275.67   17.40
  -3  -7   0  267.27   17.00
  -3  -7   0  263.07   18.10
  -3  -7   0  271.57   19.20
  -3  -7   0  279.07   17.80
  -3  -7   0  268.57   18.20
   3   7   0  275.37   18.70
  -3   7   0  259.17   17.50
  -3   7   0  252.57   17.10
   3   7   0  254.27   17.50
  -3   7   0  281.17   18.40
  -5  -7   0  195.08   13.00
  -5  -7   0  185.08   15.90
  -5  -7   0  199.48   13.50
  -5  -7   0  217.28   14.40
  -5  -7   0  198.78   14.10
  -5  -7   0  190.98   13.90
  -5  -7   0  183.78   13.00
  -5   7   0  202.78   13.50
  -5   7   0  164.38   12.70
   5   7   0  176.68   12.10
   5   7   0  185.38   12.20
  -5   7   0  182.88   12.80
  -5   7   0  196.78   12.70
  -5   7   0  197.48   12.60
  -5   7   0  168.38   12.80
   5   7   0  184.68   12.80
  -5   7   0  194.18   12.70
  -5   7   0  168.68   12.60
  -5   7   0  174.48   12.50
  -5   7   0  172.28   17.00
   5   7   0  184.08   15.00
  -5   7   0  178.28   12.40
   5   7   0  186.78   12.80
  -7  -7   0  807.42   46.10
  -7  -7   0  800.02   46.30
  -7  -7   0  806.22   45.70
   7   7   0  746.53   44.60
  -7   7   0  699.93   45.40
  -7   7   0  716.33   44.80
  -7   7   0  662.93   44.90
  -7   7   0  812.12   47.10
  -7   7   0  617.54   45.30
  -7   7   0  717.43   45.80
  -7   7   0  729.53   45.20
  -7   7   0  675.03   45.00
  -7   7   0  731.83   45.30
   7   7   0  686.43   45.20
  -7   7   0  631.34   45.10
   7   7   0  621.74   47.70
   7   7   0  674.13   44.60
   7   7   0  694.13   44.50
   7   7   0  670.73   45.40
  -9  -7   0  180.08   13.60
  -9  -7   0  171.38   12.90
  -9  -7   0  165.28   13.50
  -9  -7   0  168.58   14.10
  -9  -7   0  165.78   13.70
  -9   7   0  190.38   13.40
  -9   7   0  195.88   12.30
  -9   7   0  214.98   12.60
   9   7   0  177.58   12.30
   9   7   0  194.58   12.60
  -9   7   0  198.78   13.10
   9   7   0  172.98   13.40
   9   7   0  188.58   12.40
  -9   7   0  199.58   12.90
  -9   7   0  172.88   12.20
  -9   7   0  202.28   14.30
  -9   7   0  189.68   12.50
  -9   7   0  208.18   13.20
   9   7   0  158.38   13.30
 -11   7   0   37.40    4.10
  11   7   0   44.60    3.50
  11   7   0   43.90    3.60
 -11   7   0   46.30    3.90
 -11   7   0   48.40    4.30
   0  -8   0  784.12   49.90
   0  -8   0  795.72   51.09
   0  -8   0  817.22   50.29
   0  -8   0  715.63   49.40
   0  -8   0  782.72   50.09
   0   8   0  855.91   50.69
   2  -8   0   80.59    6.70
   2  -8   0   79.89    7.40
  -2  -8   0   92.39    6.30
   2  -8   0   82.09    6.30
  -2  -8   0   84.59    8.60
  -2  -8   0  106.69    7.20
   2  -8   0   77.59    6.60
  -2  -8   0   91.79    7.00
  -2  -8   0   89.89    7.50
  -2   8   0   94.59    7.50
   2   8   0   91.59    6.70
  -2   8   0   89.69    7.10
   2   8   0   92.39    8.40
  -4  -8   0  258.97   16.30
  -4  -8   0  234.88   17.00
  -4  -8   0  279.27   17.50
  -4  -8   0  290.07   17.00
  -4  -8   0  241.98   19.20
  -4  -8   0  270.87   17.60
  -4   8   0  219.88   17.00
  -4   8   0  264.77   17.20
  -4   8   0  275.07   16.80
  -4   8   0  243.98   16.80
  -4   8   0  271.47   16.70
   4   8   0  233.08   17.00
  -4   8   0  269.57   18.20
  -4   8   0  259.87   18.00
  -4   8   0  267.27   17.10
   4   8   0  225.78   16.10
  -4   8   0  274.87   17.10
  -4   8   0  219.88   16.90
  -4   8   0  262.77   17.40
   4   8   0  228.18   16.10
  -4   8   0  219.68   16.40
  -6  -8   0   37.60    6.10
  -6  -8   0   34.30    4.60
  -6   8   0   36.40    4.10
   6   8   0   21.60    4.90
   6   8   0   24.30    4.70
   6   8   0   31.80    4.40
  -6   8   0   34.30    4.10
  -6   8   0   45.80    6.30
  -6   8   0   33.70    5.00
  -6   8   0   24.20    4.00
   6   8   0   27.90    3.20
   6   8   0   23.80    3.40
  -6   8   0   40.20    4.10
  -6   8   0   26.90    3.30
  -8   8   0  232.58   18.40
  -8   8   0  277.07   18.40
  -8   8   0  295.67   19.80
   8   8   0  266.27   20.40
  -8   8   0  257.87   18.10
  -8   8   0  282.77   18.00
   8   8   0  246.38   18.20
  -8   8   0  276.07   18.10
  -8   8   0  251.87   18.30
   8   8   0  300.37   17.70
  -8   8   0  279.87   18.90
  -8   8   0  315.97   17.90
 -10  -8   0   17.70    7.10
 -10  -8   0   25.30    4.50
 -10  -8   0   17.70    2.70
 -10  -8   0   22.90    4.10
 -10  -8   0   19.70    4.40
 -10   8   0   17.60    3.20
 -10   8   0   21.40    3.50
 -10   8   0   24.10    2.80
  10   8   0   21.00    3.50
 -10   8   0   17.90    3.30
  10   8   0   16.90    2.50
 -10   8   0    9.50    4.40
   1  -9   0   18.90    3.10
  -1  -9   0   13.50    2.40
   1  -9   0   21.60    3.60
  -1  -9   0   24.20    3.30
   1   9   0   14.60    3.60
   1   9   0   19.80    2.90
  -1   9   0   20.50    2.10
  -1   9   0   15.70    2.80
   1   9   0   11.50    2.50
  -3  -9   0   31.80    4.50
   3  -9   0   34.70    5.20
  -3  -9   0   33.10    7.10
   3  -9   0   31.00    3.50
  -3  -9   0   39.70    3.60
   3  -9   0   30.90    4.30
  -3  -9   0   41.20    5.40
  -3   9   0   34.00    4.20
  -3   9   0   37.00    4.90
  -3   9   0   35.40    4.10
   3   9   0   34.90    3.90
   3   9   0   35.30    6.90
  -3   9   0   38.30    4.30
  -3   9   0   32.30    4.00
  -3   9   0   28.90    5.10
   3   9   0   38.20    4.80
  -3   9   0   30.90    4.00
  -3   9   0   43.90    4.20
  -3   9   0   42.00    4.30
  -3   9   0   32.10    3.60
  -3   9   0   37.60    4.90
  -5  -9   0    2.30    3.30
  -5  -9   0   -0.10    2.40
  -5  -9   0   -0.20    2.80
  -5  -9   0    9.20    6.20
  -5  -9   0    5.20    2.60
  -5  -9   0   -2.10    3.00
  -5  -9   0    2.80    1.70
  -5  -9   0   -0.60    3.00
  -5  -9   0    1.30    2.40
  -5   9   0    3.50    3.00
  -5   9   0    2.20    2.00
   5   9   0   -1.60    2.50
   5   9   0   -4.50    3.30
  -5   9   0    7.10    2.20
  -5   9   0    4.90    2.30
  -5   9   0    3.80    1.80
  -5   9   0    1.90    4.60
  -5   9   0    1.70    1.90
  -5   9   0    0.30    3.20
   5   9   0    1.30    1.70
  -5   9   0    2.60    3.40
  -5   9   0    6.20    2.70
  -5   9   0    6.40    2.60
   5   9   0    1.70    2.50
  -7  -9   0  127.89    9.30
  -7   9   0   95.39    8.90
  -7   9   0  122.29    9.60
  -7   9   0   91.09    7.80
   7   9   0  103.69    7.40
   7   9   0  100.39    8.30
  -7   9   0  105.99    8.10
  -7   9   0  107.39    8.10
  -7   9   0  114.29    8.00
  -7   9   0  109.09    9.00
  -7   9   0  119.39    8.70
   7   9   0  108.69    7.50
  -9  -9   0    3.60    3.90
  -9  -9   0    7.60    4.70
  -9  -9   0    3.60    3.60
  -9  -9   0    7.30    3.40
  -9  -9   0    1.00    2.70
  -9   9   0    2.60    2.70
   9   9   0    5.50    2.50
  -9   9   0    4.30    2.00
   9   9   0    2.90    1.60
  -9   9   0    2.70    2.50
  -9   9   0    1.60    2.70
  -9   9   0    4.70    2.80
   0 -10   0  135.09   12.30
   0 -10   0  156.28   11.20
   0 -10   0  140.99   10.60
   0 -10   0  156.28   11.20
   0 -10   0  148.69   10.60
   0 -10   0  153.48   10.90
   0 -10   0  151.58    9.90
   0  10   0  151.18   10.30
   0  10   0  150.78   11.50
   0  10   0  129.39   10.20
   0  10   0  144.49   10.60
   0  10   0  142.69   10.20
   0  10   0  149.09    9.80
   2 -10   0  292.67   20.70
  -2 -10   0  293.37   21.10
   2 -10   0  277.87   21.90
   2 -10   0  307.57   21.00
  -2 -10   0  311.27   20.40
  -2 -10   0  330.57   21.40
  -2 -10   0  264.77   22.80
  -2 -10   0  340.67   20.90
  -2 -10   0  371.46   22.10
  -2 -10   0  300.97   21.80
   2 -10   0  295.87   20.30
   2 -10   0  275.47   20.70
  -2 -10   0  309.27   20.30
  -2  10   0  333.67   20.80
  -2  10   0  349.57   20.80
   2  10   0  296.07   20.90
   2  10   0  276.17   20.30
  -2  10   0  337.17   21.20
  -2  10   0  327.47   20.70
   2  10   0  322.97   20.50
  -2  10   0  368.46   23.80
   2  10   0  295.27   22.60
  -2  10   0  326.47   20.80
  -2  10   0  332.27   22.50
  -2  10   0  359.86   21.10
   2  10   0  328.47   20.60
  -4 -10   0  180.18   12.80
   4 -10   0  147.19   11.30
  -4 -10   0  148.59   14.90
  -4 -10   0  164.68   13.20
  -4 -10   0  182.28   12.20
  -4 -10   0  185.08   12.90
  -4 -10   0  183.08   13.50
  -4 -10   0  164.68   11.30
  -4 -10   0  156.28   12.20
  -4  10   0  157.68   13.30
  -4  10   0  146.69   11.60
  -4  10   0  167.18   12.90
  -4  10   0  171.28   11.80
  -4  10   0  188.28   12.50
   4  10   0  195.18   12.10
   4  10   0  154.58   11.70
  -4  10   0  167.68   11.90
  -4  10   0  170.88   12.30
  -4  10   0  171.58   12.20
  -4  10   0  156.58   12.00
  -6 -10   0  353.96   22.30
  -6 -10   0  298.27   25.40
  -6 -10   0  367.76   23.80
  -6 -10   0  360.56   24.00
  -6 -10   0  397.16   23.60
  -6 -10   0  402.36   25.10
  -6  10   0  333.87   23.00
  -6  10   0  395.96   23.70
   6  10   0  324.37   22.20
   6  10   0  319.47   22.90
  -6  10   0  300.97   22.70
  -6  10   0  344.37   25.40
  -6  10   0  320.37   22.50
  -6  10   0  362.46   22.80
  -6  10   0  371.06   23.20
  -6  10   0  373.66   23.60
  -6  10   0  365.56   23.80
  -6  10   0  352.56   23.00
   6  10   0  347.07   22.60
  -8 -10   0   -0.10    3.30
  -8 -10   0    6.50    5.70
  -8 -10   0    5.20    3.50
  -8 -10   0    0.90    3.00
  -8  10   0    6.60    2.50
  -8  10   0    7.00    1.70
   8  10   0    3.20    2.10
 -10 -10   0  131.39    8.90
 -10 -10   0  116.39    8.90
   1 -11   0  167.48   11.90
  -1 -11   0  156.68   14.00
  -1 -11   0  157.48   11.80
   1 -11   0  159.18   12.00
  -1 -11   0  161.68   11.50
  -1 -11   0  166.28   12.50
  -1 -11   0  157.78   11.90
  -1 -11   0  150.58   12.40
   1 -11   0  178.68   12.30
   1 -11   0  155.38   13.50
  -1 -11   0  148.09   10.80
   1 -11   0  159.08   10.90
  -1 -11   0  156.38   12.00
  -1 -11   0  153.78   11.00
   1 -11   0  160.88   11.70
   1  11   0  167.78   12.40
   1  11   0  159.98   12.00
  -1  11   0  166.38   13.00
   1  11   0  161.18   11.70
  -1  11   0  174.28   11.50
   1  11   0  157.08   12.90
  -1  11   0  179.18   14.10
  -1  11   0  163.38   10.60
  -1  11   0  163.78   11.50
  -3 -11   0   24.50    4.80
   3 -11   0   33.70    4.10
  -3 -11   0   32.30    6.90
   3 -11   0   27.60    4.10
  -3 -11   0   25.40    4.80
  -3 -11   0   37.10    5.20
  -3 -11   0   23.60    3.30
  -3 -11   0   27.50    5.40
  -3 -11   0   36.50    5.70
  -3 -11   0   30.90    4.10
   3 -11   0   27.90    5.60
  -3  11   0   36.90    4.50
   3  11   0   29.80    3.70
  -3  11   0   32.80    6.20
  -3  11   0   28.80    4.00
  -3  11   0   33.80    4.10
  -3  11   0   28.80    3.30
  -3  11   0   33.80    4.50
   3  11   0   29.00    5.60
  -3  11   0   37.70    5.50
  -3  11   0   33.10    4.10
   3  11   0   38.30    7.40
   3  11   0   28.30    3.80
  -5 -11   0   28.90    3.40
  -5 -11   0   26.60    5.40
  -5 -11   0   30.30    4.90
  -5 -11   0   30.30    5.80
  -5 -11   0   27.80    4.40
  -5 -11   0   30.20   12.20
  -5 -11   0   30.00    4.50
   5  11   0   17.70    7.60
  -5  11   0   31.20    4.40
  -5  11   0   26.40    3.30
  -5  11   0   33.70    4.70
  -5  11   0   18.60    6.60
  -5  11   0   35.50    4.00
  -5  11   0   32.40    3.30
   5  11   0   24.60    3.90
  -5  11   0   26.90    4.50
  -5  11   0   30.50    4.10
   5  11   0   26.30    3.30
  -7 -11   0  146.49   10.60
  -7 -11   0  143.29   11.10
  -7 -11   0  147.69   11.70
  -7 -11   0  149.19   10.80
  -7  11   0  135.09    9.50
   7  11   0  139.79    9.90
  -7  11   0  131.89    9.80
  -7  11   0  137.39   10.70
  -7  11   0  137.29    9.50
  -7  11   0  124.99   10.50
  -9 -11   0   64.59    6.10
  -9 -11   0   56.49    4.70
  -9  11   0   76.29    4.90
   0 -12   0 1157.48   70.99
   0 -12   0 1154.78   70.09
   0 -12   0 1077.69   71.29
   0 -12   0 1089.99   70.89
   0 -12   0 1112.49   72.99
   0 -12   0 1095.59   70.49
   0  12   0 1084.39   70.29
   0  12   0 1055.09   71.69
   0  12   0 1154.08   69.69
   0  12   0 1175.28   70.19
   0  12   0 1146.39   70.79
   2 -12   0  291.47   18.20
   2 -12   0  279.17   18.60
  -2 -12   0  297.47   19.00
  -2 -12   0  297.07   18.40
  -2 -12   0  291.47   19.50
   2 -12   0  264.47   19.10
   2 -12   0  274.17   19.40
   2 -12   0  267.07   19.10
   2 -12   0  285.67   19.00
   2 -12   0  262.77   20.20
  -2 -12   0  287.47   19.40
  -2 -12   0  288.47   20.20
  -2 -12   0  279.07   19.40
  -2 -12   0  299.67   20.20
  -2 -12   0  263.27   21.50
  -2  12   0  267.57   18.90
  -2  12   0  276.57   18.50
  -2  12   0  281.67   18.70
  -2  12   0  276.47   18.80
   2  12   0  265.37   18.80
  -2  12   0  280.27   19.10
   2  12   0  286.07   18.60
   2  12   0  290.77   18.30
   4 -12   0  991.70   60.09
  -4 -12   0  865.41   63.39
  -4 -12   0 1011.80   59.69
  -4 -12   0  914.81   61.49
  -4 -12   0  959.90   60.99
   4 -12   0  884.31   59.89
  -4 -12   0  990.30   60.49
   4 -12   0  905.91   60.19
  -4 -12   0  977.80   61.59
  -4 -12   0  928.01   60.59
  -4 -12   0  967.30   60.49
   4  12   0  969.70   59.79
  -4  12   0  837.12   59.59
  -4  12   0  941.71   60.39
  -4  12   0  980.70   60.39
  -4  12   0 1070.69   61.29
  -4  12   0  980.40   59.99
  -4  12   0  957.60   60.49
  -4  12   0  967.90   59.79
   4  12   0  927.51   59.79
  -6 -12   0    5.80    3.30
  -6 -12   0    4.80    3.30
  -6 -12   0    3.90    2.90
  -6  12   0    4.40    3.10
  -6  12   0    4.20    1.70
  -6  12   0    5.40    2.10
  -6  12   0    3.90    2.20
   6  12   0    3.10    2.10
  -6  12   0    3.50    2.60
   6  12   0    5.10    2.00
  -8 -12   0  613.04   44.80
  -8 -12   0  755.82   46.70
  -8 -12   0  774.52   46.30
  -8 -12   0  755.82   46.50
  -8  12   0  605.54   44.80
   8  12   0  777.92   45.20
  -8  12   0  745.93   44.90
  -1 -13   0  171.88   14.00
   1 -13   0  183.78   13.60
  -1 -13   0  186.68   14.10
   1 -13   0  187.78   13.90
   1 -13   0  198.48   13.60
   1 -13   0  192.88   12.50
   1 -13   0  194.78   13.00
   1 -13   0  191.98   13.50
   1 -13   0  173.08   14.80
  -1 -13   0  182.48   13.60
  -1 -13   0  180.68   12.50
  -1 -13   0  187.28   13.70
  -1 -13   0  178.88   13.10
  -1 -13   0  165.38   15.40
   1  13   0  177.58   12.80
  -1  13   0  179.58   13.00
  -1  13   0  208.98   13.50
  -1  13   0  200.98   12.80
   1  13   0  175.68   12.20
   1  13   0  189.58   13.20
  -1  13   0  190.48   13.00
  -3 -13   0  118.59    9.70
   3 -13   0  119.39    9.10
  -3 -13   0  103.79    8.40
   3 -13   0  129.99    9.40
   3 -13   0  120.89   11.20
   3 -13   0  109.29    9.80
   3 -13   0  139.39    9.00
   3 -13   0  109.19    9.80
  -3 -13   0   95.39    9.30
  -3 -13   0  128.79   10.60
  -3 -13   0  145.69   13.90
   3 -13   0  130.99    8.40
  -3 -13   0  123.19    9.30
  -3 -13   0   97.79   13.60
  -3  13   0  135.69    9.00
  -3  13   0  137.19    9.40
  -3  13   0  117.79    8.60
  -3  13   0  127.09    9.30
   3  13   0  102.89    8.60
   3  13   0  105.79    8.70
  -3  13   0  135.39    9.40
  -5 -13   0  160.08   13.80
  -5 -13   0  166.98   14.10
   5 -13   0  175.68   12.30
  -5 -13   0  182.58   11.80
  -5 -13   0  169.58   13.10
  -5  13   0  193.78   13.00
  -5  13   0  193.48   12.10
  -5  13   0  162.08   11.70
  -5  13   0  184.78   12.60
   5  13   0  186.58   12.00
   5  13   0  181.48   12.10
  -7 -13   0  237.48   13.90
  -7 -13   0  214.98   14.80
  -7  13   0  200.38   12.70
  -7  13   0  168.68   13.30
  -7  13   0  179.18   12.70
   7  13   0  186.58   13.00
   0 -14   0   32.90    5.00
   0 -14   0   45.30    3.90
   0  14   0   27.60    4.50
   0  14   0   48.20    4.60
   0  14   0   31.40    4.30
   2 -14   0  118.69    7.60
  -2 -14   0   85.89    8.40
  -2 -14   0  109.29    8.90
   2 -14   0   95.29    8.40
  -2 -14   0  103.49    7.60
  -2 -14   0  109.79    9.50
   2 -14   0   96.69    9.40
  -2  14   0  123.29    8.50
  -2  14   0  104.49    8.30
  -2  14   0  112.19    8.10
   2  14   0  112.19    8.00
   2  14   0   88.79    7.80
  -4 -14   0    6.20    3.70
  -4 -14   0    4.00    2.90
  -4 -14   0    1.30    3.10
   4 -14   0    2.40    2.40
  -4 -14   0    3.90    2.60
  -4 -14   0    1.30    1.80
  -4  14   0    4.20    2.80
  -4  14   0    1.20    2.00
  -4  14   0    4.60    2.40
   4  14   0    1.70    1.80
   4  14   0    5.90    2.20
  -6 -14   0  118.59   10.10
  -6 -14   0  125.59    9.50
  -6 -14   0  124.79   11.90
  -6  14   0  141.29    9.50
   1 -15   0   38.70    3.70
  -1 -15   0   53.19    6.10
   1 -15   0   43.10    4.50
  -1 -15   0   47.70    5.20
  -1 -15   0   37.20    3.90
   1 -15   0   35.40    5.90
   1 -15   0   42.80    5.20
   1  15   0   41.70    4.40
  -1  15   0   45.80    4.50
  -1  15   0   28.90    4.40
   3 -15   0   40.70    4.40
  -3 -15   0   49.00    6.60
  -3 -15   0   45.50    5.30
  -3 -15   0   52.19    5.10
  -3 -15   0   47.20    4.90
  -3 -15   0   41.20    4.00
   3  15   0   42.50    4.60
   3  15   0   36.50    4.40
   3  15   0   39.80    3.80
  -3  15   0   36.00    4.20
  -3  15   0   46.50    5.00
  -3  15   0   41.10    4.60
  -5  15   0   49.80    3.70
  -5  15   0   43.30    4.10
   0 -16   0 1434.06   83.99
   0 -16   0 1312.37   84.49
   0  16   0 1386.56   84.29
   0  16   0 1296.47   84.09
   0  16   0 1309.17   84.19
  -2 -16   0  179.18   12.10
   2 -16   0  175.58   12.20
  -2 -16   0  185.28   12.50
   2 -16   0  182.28   11.60
   2  16   0  186.48   11.90
  -2  16   0  171.28   12.10
  -2  16   0  176.48   11.70
  -2  16   0  173.58   12.00
   2  16   0  161.38   11.80
  -4  16   0  137.79    9.80
  -4  16   0  145.39    9.20
  -4  16   0  154.48    9.60
   4  16   0  134.89    9.80
   4  16   0  129.39    9.40
  12   0  -1  106.99    8.70
  12   0  -1  105.19    7.20
  10   0  -1    4.30    1.90
 -10   0   1    5.40    2.50
 -10   0   1    7.80    2.70
  10   0  -1    1.60    2.70
  10   0  -1    4.10    2.00
  10   0  -1   -2.70    5.30
 -10   0   1    4.20    3.20
  10   0  -1    5.90    1.80
 -10   0   1   10.10    4.00
 -10   0   1    3.20    3.20
 -10   0   1    5.00    2.90
 -10   0   1    4.50    2.80
 -10   0   1    5.60    2.40
  -8   0   1  340.87   22.00
  -8   0   1  324.97   22.30
  -8   0   1  322.47   21.60
   8   0  -1  272.37   21.70
  -8   0   1  320.47   22.60
  -8   0   1  325.97   21.70
  -8   0   1  302.17   21.10
  -8   0   1  347.97   21.40
  -6   0   1    3.60    2.10
   6   0  -1   -0.40    2.70
   6   0  -1    0.20    1.60
   6   0  -1    1.60    1.10
  -6   0   1    2.00    2.20
  -6   0   1    0.50    3.00
   6   0  -1    0.80    1.50
  -2   0   1    4.10    1.20
   2   0  -1    7.80    1.40
  -2   0   1    4.40    1.40
   0   0  -1    0.80    0.30
   0   0   1    0.10    0.30
   0   0  -1   -0.10    0.50
   0   0   1    0.10    0.40
   2   0   1    5.90    1.70
   2   0   1    5.80    1.80
   2   0   1    3.60    1.20
  -6   0  -1   -2.20    2.50
  -6   0  -1    0.00    2.00
   6   0   1    2.70    1.70
   6   0   1    1.00    1.40
   6   0   1    0.10    1.70
  -6   0  -1    0.50    2.30
  -8   0  -1  235.58   15.40
   8   0   1  241.78   16.10
   8   0   1  188.18   17.00
  -8   0  -1  189.88   14.60
  -8   0  -1  256.47   16.90
  -8   0  -1  242.68   16.10
  10   0   1    8.50    4.90
 -10   0  -1    2.80    3.50
 -10   0  -1    4.10    2.70
  10   0   1    1.50    5.80
 -10   0  -1    3.50    2.30
 -10   0  -1    3.30    3.20
  10   0   1    3.80    1.70
 -10   0  -1    3.40    2.00
 -10   0  -1    1.80    3.10
 -10   0  -1    4.80    3.50
  10   0   1    3.20    2.00
  10   0   1    4.70    2.50
 -10   0  -1    0.80    2.40
  10   0   1    4.20    1.60
  12   0   1   55.49    4.70
 -12   0  -1   67.29    4.90
  12   0   1   47.40    4.40
  11  -1  -1    8.10    3.10
 -11  -1   1   10.50    3.70
  11  -1  -1   13.80    4.30
 -11  -1   1   12.90    3.20
 -11  -1   1    8.60    2.60
 -11  -1   1    6.90    2.40
 -11  -1   1    8.90    3.50
  11  -1  -1    6.60    2.20
  11  -1  -1    9.80    2.10
 -11  -1   1    6.70    4.50
 -11  -1   1   13.40    4.00
 -11  -1   1   12.20    2.80
  11   1  -1   10.40    2.10
  11   1  -1    9.80    3.10
 -11   1   1    9.40    3.20
  11   1  -1    7.80    2.30
 -11   1   1    6.20    4.10
  11   1  -1    5.10    2.20
 -11   1   1    4.70    3.10
 -11   1   1   10.10    3.10
 -11   1   1   13.10    3.00
 -11   1   1   12.00    3.10
 -11   1   1   12.40    3.00
  11   1  -1   12.50    4.20
   9  -1  -1   18.50    3.20
   9  -1  -1   21.80    3.80
   9  -1  -1   30.40    3.60
  -9  -1   1   38.20    6.10
   9  -1  -1   33.00    5.30
  -9  -1   1   28.70    3.90
  -9  -1   1   32.70    4.30
  -9  -1   1   28.80    4.60
  -9  -1   1   39.50    5.10
   9  -1  -1   28.10    3.30
   9  -1  -1   13.60    5.10
   9   1  -1   23.20    4.40
   9   1  -1   23.60    3.40
  -9   1   1   29.10    4.30
  -9   1   1   25.90    4.80
   9   1  -1   23.40    6.30
   9   1  -1   23.40    4.90
  -9   1   1   29.90    5.10
   9   1  -1   21.40    3.10
  -9   1   1   29.90    3.90
  -9   1   1   19.60    2.90
   9   1  -1   20.80    3.30
  -9   1   1   30.00    5.10
  -9   1   1   33.90    4.60
  -9   1   1   24.70    4.40
  -7  -1   1  672.73   38.50
  -7  -1   1  645.44   39.20
  -7  -1   1  661.73   39.30
  -7  -1   1  564.64   38.40
  -7  -1   1  682.33   39.50
  -7  -1   1  635.14   39.70
   7  -1  -1  547.55   39.20
   7  -1  -1  598.34   38.60
   7  -1  -1  499.35   37.80
  -7   1   1  534.25   38.20
   7   1  -1  527.25   37.90
  -7   1   1  588.54   38.90
  -7   1   1  605.04   38.90
  -7   1   1  691.63   38.20
  -7   1   1  647.94   39.80
   7   1  -1  510.85   38.00
  -7   1   1  631.94   38.40
   7   1  -1  572.14   38.80
  -7   1   1  642.84   38.70
  -7   1   1  560.14   38.40
   5  -1  -1  200.78   12.40
  -5  -1   1  214.58   13.10
   5  -1  -1  196.78   12.90
   5  -1  -1  168.08   11.80
  -5  -1   1  173.48   12.40
   5   1  -1  160.48   12.00
   5   1  -1  181.68   13.40
  -5   1   1  184.78   12.40
   5   1  -1  173.78   12.60
   3  -1  -1  180.78   10.60
   3  -1  -1  168.48   10.30
  -3  -1   1  155.28   10.60
  -3  -1   1  140.69   10.80
  -3  -1   1  152.78   10.40
  -3  -1   1  133.49   10.90
  -3  -1   1  167.98   10.60
  -3   1   1  174.38   10.60
  -3   1   1  147.99   10.70
   3   1  -1  156.08   10.60
  -3   1   1  172.28   10.90
  -3   1   1  178.48   11.20
   3   1  -1  152.28   11.00
   1  -1  -1 1080.19   69.39
  -1  -1   1 1040.00   69.79
  -1  -1   1 1104.29   69.59
   1   1  -1 1173.18   69.79
  -1   1   1 1253.17   69.79
   1   1  -1 1078.39   69.59
  -1  -1  -1 1394.76   84.79
  -1  -1  -1 1327.47   84.89
  -1   1  -1 1440.76   84.89
   1   1   1 1345.37   84.69
   1   1   1 1323.57   84.89
  -3  -1  -1    3.80    1.30
   3  -1   1    4.10    1.10
   3  -1   1    2.90    0.90
   3   1   1    3.00    1.40
  -3   1  -1    6.30    2.00
  -3   1  -1    5.90    1.50
   5  -1   1  534.95   38.60
  -5  -1  -1  654.33   39.40
   5  -1   1  623.34   39.50
  -5  -1  -1  622.64   39.00
  -5  -1  -1  662.13   39.70
   5  -1   1  642.04   39.10
  -5  -1  -1  584.14   39.30
  -5   1  -1  630.94   39.40
  -5   1  -1  696.23   39.30
  -5   1  -1  593.44   39.30
   5   1   1  557.74   38.80
   5   1   1  625.84   39.30
  -7  -1  -1  393.86   24.70
  -7  -1  -1  369.86   24.90
  -7  -1  -1  330.27   23.70
   7  -1   1  313.77   23.20
   7  -1   1  373.46   24.00
  -7  -1  -1  364.96   25.50
  -7  -1  -1  424.16   24.30
  -7  -1  -1  362.86   24.60
  -7  -1  -1  347.97   23.60
   7   1   1  360.36   24.10
  -7   1  -1  371.16   24.20
  -7   1  -1  372.76   23.90
  -7   1  -1  319.27   24.80
  -7   1  -1  338.87   23.60
  -7   1  -1  387.36   25.10
  -7   1  -1  413.56   23.80
   7   1   1  316.67   23.40
  -7   1  -1  352.66   24.00
   7   1   1  355.26   25.00
  -7   1  -1  408.66   24.30
   9  -1   1  186.28   13.60
  -9  -1  -1  194.78   12.70
   9  -1   1  185.58   15.10
  -9  -1  -1  166.88   13.70
  -9  -1  -1  184.18   12.80
  -9  -1  -1  165.78   13.50
  -9  -1  -1  174.98   14.20
   9  -1   1  177.18   12.00
  -9  -1  -1  181.78   12.60
  -9  -1  -1  173.28   13.40
  -9  -1  -1  149.49   12.70
   9  -1   1  182.18   12.70
  -9   1  -1  186.98   12.80
  -9   1  -1  197.98   14.30
  -9   1  -1  181.28   12.50
  -9   1  -1  207.88   13.30
   9   1   1  171.38   12.90
  -9   1  -1  181.78   13.30
  -9   1  -1  179.78   14.00
   9   1   1  181.08   15.60
   9   1   1  191.98   14.00
   9   1   1  184.28   12.00
  -9   1  -1  165.78   13.20
   9   1   1  185.28   12.10
  -9   1  -1  176.68   12.60
   9   1   1  181.08   12.20
  -9   1  -1  198.18   12.90
  11  -1   1   68.39    4.90
 -11  -1  -1   58.49    6.30
  11  -1   1   64.69    5.10
 -11  -1  -1   66.09    6.50
  11  -1   1   43.60    8.50
 -11  -1  -1   66.69    5.30
 -11  -1  -1   52.09    6.70
 -11  -1  -1   59.19    5.60
 -11  -1  -1   64.09    5.60
 -11  -1  -1   62.09    5.50
  11   1   1   70.09    5.20
 -11   1  -1   75.09    5.60
  11   1   1   71.29    7.10
 -11   1  -1   64.89    5.50
 -11   1  -1   62.09    5.50
  11   1   1   61.79    5.10
 -11   1  -1   54.79    5.50
 -11   1  -1   61.59    6.20
  11   1   1   67.29    4.90
 -11   1  -1   60.09    6.30
  12  -2  -1    3.00    1.10
  12  -2  -1    3.60    1.60
 -12  -2   1    2.30    1.90
  12  -2  -1    1.50    2.50
 -12  -2   1    2.30    2.10
 -12  -2   1    3.20    1.80
 -12   2   1    2.40    2.00
  12   2  -1    1.90    1.50
 -12   2   1    0.60    1.80
 -12   2   1    4.90    1.80
  12   2  -1    3.40    1.20
  12   2  -1    1.20    2.10
 -12   2   1    5.40    2.40
  10  -2  -1  187.58   13.50
 -10  -2   1  157.38   13.30
 -10  -2   1  149.09   12.10
  10  -2  -1  165.58   11.50
 -10  -2   1  177.88   11.90
 -10  -2   1  155.18   12.00
 -10  -2   1  173.88   12.20
 -10  -2   1  175.78   12.70
  10  -2  -1  169.78   11.60
  10  -2  -1  193.78   15.80
 -10  -2   1  166.68   12.80
  10  -2  -1  169.08   12.30
 -10  -2   1  149.19   12.80
 -10   2   1  166.78   12.40
 -10   2   1  154.48   12.50
 -10   2   1  187.28   13.70
 -10   2   1  173.78   12.50
  10   2  -1  174.38   11.50
  10   2  -1  208.08   16.70
  10   2  -1  164.88   11.70
  10   2  -1  164.38   16.00
 -10   2   1  179.48   12.70
 -10   2   1  191.68   12.30
  10   2  -1  167.38   11.60
 -10   2   1  148.39   12.60
  10   2  -1  179.48   12.60
  10   2  -1  172.38   13.60
 -10   2   1  181.18   12.00
 -10   2   1  191.28   12.40
 -10   2   1  169.68   11.50
  -8  -2   1   44.30    7.30
  -8  -2   1   35.20    5.70
  -8  -2   1   26.10    5.00
   8  -2  -1   25.40    3.60
  -8  -2   1   29.70    5.00
   8  -2  -1   27.60    4.40
  -8  -2   1   19.70    3.50
   8  -2  -1   27.10    5.80
  -8  -2   1   26.80    4.10
  -8  -2   1   22.30    5.00
  -8  -2   1   31.20    5.00
  -8   2   1   24.00    4.40
  -8   2   1   32.20    5.00
   8   2  -1   31.10    3.30
  -8   2   1   25.40    3.00
   8   2  -1   32.80    5.40
   8   2  -1   24.80    3.10
  -8   2   1   32.10    4.30
   8   2  -1   26.10    6.30
  -8   2   1   24.30    4.10
  -8   2   1   30.40    4.50
   8   2  -1   23.90    4.10
  -8   2   1   32.90    4.00
  -8   2   1   29.70    4.90
  -8   2   1   35.20    5.30
  -8   2   1   25.60    4.90
  -6  -2   1 2382.96  139.59
  -6  -2   1 2321.97  139.19
  -6  -2   1 2289.57  139.89
  -6  -2   1 2087.69  139.39
   6  -2  -1 2309.97  139.19
   6  -2  -1 2246.38  139.69
   6   2  -1 2118.49  138.99
  -6   2   1 2236.78  139.59
  -6   2   1 2217.08  139.29
   6   2  -1 2205.38  139.59
   6   2  -1 1959.20  138.59
  -6   2   1 2447.06  139.49
  -4  -2   1   36.70    3.20
  -4  -2   1   31.10    4.30
   4  -2  -1   32.90    2.90
  -4  -2   1   23.90    3.40
  -4  -2   1   38.80    4.00
   4  -2  -1   28.70    3.50
   4   2  -1   26.20    3.50
  -4   2   1   29.90    3.80
   4   2  -1   25.40    3.00
  -4   2   1   34.80    3.20
  -4   2   1   30.40    3.80
   4   2  -1   28.60    4.70
  -4   2   1   26.80    3.10
  -2  -2   1  138.09    9.70
   2   2  -1  143.99   10.30
  -2   2   1  163.48   10.00
   2   2  -1  135.49    9.70
   0  -2   1 4473.45  263.77
   0  -2  -1 4020.50  263.57
  -2  -2  -1   42.30    3.50
  -2  -2  -1   27.30    4.00
  -2  -2  -1   30.50    3.30
   2   2   1   39.00    3.30
   2   2   1   29.80    3.60
  -4  -2  -1  799.92   53.89
  -4  -2  -1  887.01   53.79
  -4  -2  -1  890.91   54.09
  -4  -2  -1  904.31   53.79
   4  -2   1  825.42   53.39
  -4  -2  -1  859.51   53.49
  -4  -2  -1  809.72   53.89
  -4   2  -1  787.52   53.59
  -4   2  -1  994.90   54.59
  -4   2  -1  970.20   54.59
  -4   2  -1  795.62   53.59
   4   2   1  807.22   54.29
   4   2   1  857.51   53.89
   4   2   1  815.12   53.49
  -6  -2  -1 1782.12  114.39
  -6  -2  -1 1867.91  114.49
  -6  -2  -1 1852.41  114.89
  -6  -2  -1 1899.71  114.19
   6  -2   1 1886.51  114.09
   6  -2   1 1873.11  114.59
   6  -2   1 1677.13  113.59
   6   2   1 1790.52  113.99
  -6   2  -1 1802.82  114.19
  -6   2  -1 1819.32  114.29
   6   2   1 1801.02  115.19
   6   2   1 1892.41  114.59
   6   2   1 1659.13  113.59
  -6   2  -1 2018.00  114.39
  -8  -2  -1    8.90    3.90
   8  -2   1    7.80    2.30
  -8  -2  -1    6.20    2.10
  -8  -2  -1    3.80    3.30
  -8  -2  -1   10.70    4.40
  -8  -2  -1    6.30    4.00
  -8  -2  -1   11.50    3.40
   8  -2   1    7.80    3.80
  -8  -2  -1    8.70    3.00
   8  -2   1   11.10    3.00
   8  -2   1    8.90    1.70
  -8   2  -1   11.00    3.20
   8   2   1    7.90    2.80
   8   2   1    2.90    2.00
  -8   2  -1   12.10    3.20
   8   2   1    8.30    4.50
  -8   2  -1    9.10    3.50
   8   2   1    6.70    3.50
  -8   2  -1    7.50    2.30
  -8   2  -1    4.20    2.30
  -8   2  -1    7.70    2.10
   8   2   1   11.70    1.90
   8   2   1   13.60    2.30
  -8   2  -1    8.10    4.10
  -8   2  -1    6.40    3.40
  -8   2  -1    9.40    4.00
 -10  -2  -1  576.84   38.70
 -10  -2  -1  616.14   38.80
 -10  -2  -1  623.14   39.20
  10  -2   1  608.44   38.50
  10  -2   1  602.14   38.50
 -10  -2  -1  572.54   38.70
 -10  -2  -1  588.74   40.10
  10  -2   1  596.14   39.10
  10  -2   1  610.24   40.90
 -10  -2  -1  562.74   39.70
 -10  -2  -1  596.84   39.00
  10   2   1  641.64   39.90
  10   2   1  671.03   38.60
  10   2   1  606.24   38.50
  10   2   1  534.95   41.60
  10   2   1  664.63   38.50
 -10   2  -1  584.84   38.70
 -10   2  -1  653.73   39.40
 -10   2  -1  626.94   40.00
 -10   2  -1  593.44   39.50
 -10   2  -1  641.84   39.10
 -10   2  -1  626.14   39.10
  10   2   1  608.54   39.20
  12  -2   1   48.50    3.70
 -12  -2  -1   44.80    4.00
  12  -2   1   40.40    3.40
 -12  -2  -1   43.70    3.90
 -12  -2  -1   45.30    4.10
 -12  -2  -1   36.90    4.70
 -12   2  -1   43.00    4.20
  12   2   1   44.30    3.70
  12   2   1   49.99    3.60
 -12   2  -1   36.00    4.30
 -12   2  -1   45.70    4.00
  12   2   1   49.60    4.10
 -12   2  -1   40.40    4.00
  12   2   1   46.60    4.50
 -11  -3   1    7.10    2.60
  11  -3  -1   14.10    2.50
 -11  -3   1   10.20    3.30
 -11  -3   1   10.20    4.60
 -11  -3   1   10.70    3.00
 -11  -3   1    8.20    3.20
  11  -3  -1   18.30    2.90
 -11  -3   1   11.20    4.00
 -11  -3   1    9.10    4.00
 -11  -3   1   12.30    3.20
  11   3  -1   10.20    3.50
  11   3  -1   11.60    4.00
 -11   3   1   17.00    3.50
  11   3  -1    8.80    2.10
 -11   3   1   16.40    3.90
  11   3  -1    7.80    2.40
 -11   3   1   15.30    3.80
 -11   3   1   13.00    3.40
  11   3  -1    5.30    2.20
 -11   3   1   10.80    2.80
 -11   3   1    9.70    3.30
   9  -3  -1    2.00    2.30
  -9  -3   1    5.80    3.00
   9  -3  -1    0.80    1.60
  -9  -3   1    4.70    2.60
  -9  -3   1    6.90    3.00
  -9  -3   1   12.50    4.80
  -9  -3   1    8.70    3.90
   9  -3  -1    2.00    3.00
  -9  -3   1    7.50    3.90
  -9  -3   1    3.50    1.90
  -9   3   1    4.10    2.00
  -9   3   1    1.40    3.30
  -9   3   1    4.20    2.60
  -9   3   1    3.20    2.50
  -9   3   1    5.70    2.70
   9   3  -1    3.10    1.90
  -9   3   1    4.00    3.00
  -9   3   1    3.40    2.50
   9   3  -1    2.80    3.60
   9   3  -1    0.00    2.00
  -9   3   1    1.50    2.60
   9   3  -1   -0.10    1.90
  -9   3   1    3.60    2.20
   9   3  -1    1.70    4.60
   9   3  -1    5.10    2.90
  -9   3   1    4.30    3.00
  -7  -3   1 1001.30   64.79
   7  -3  -1  949.31   63.19
  -7  -3   1 1058.99   64.49
  -7  -3   1 1075.69   64.49
   7  -3  -1 1105.09   64.59
   7  -3  -1 1091.29   63.89
  -7  -3   1 1007.40   64.19
  -7  -3   1  895.51   63.79
  -7   3   1  934.31   63.39
  -7   3   1 1064.59   64.19
   7   3  -1  964.70   63.19
   7   3  -1 1024.00   64.49
   7   3  -1  935.31   63.59
  -7   3   1 1059.19   63.49
  -7   3   1 1070.89   64.39
  -7   3   1  956.50   63.79
   7   3  -1  941.81   63.19
  -7   3   1 1055.79   63.99
   7   3  -1  973.40   65.39
  -7   3   1 1112.79   63.89
   7   3  -1  978.80   63.19
  -7   3   1 1133.19   65.49
  -7   3   1  902.51   63.79
  -7   3   1 1011.00   64.09
  -5  -3   1   17.50    3.10
  -5  -3   1   20.50    3.00
   5  -3  -1   20.40    3.10
  -5  -3   1   18.00    4.50
   5  -3  -1   15.50    2.60
  -5   3   1   21.70    2.90
  -5   3   1   22.00    3.80
   5   3  -1   20.30    3.50
   5   3  -1   17.50    2.10
   5   3  -1   16.60    2.90
  -5   3   1   21.60    3.80
  -3  -3   1  114.59    8.50
  -3  -3   1  129.69    8.40
  -3  -3   1  115.89    8.60
  -3  -3   1  114.89    8.50
  -3  -3   1  116.49    9.30
  -3   3   1  130.49    8.30
   3   3  -1  116.79    8.60
   3   3  -1  124.39    8.30
  -3   3   1  132.19    9.00
  -3   3   1  124.79    8.40
  -3   3   1  124.19    8.20
  -1  -3   1 1498.95   93.89
  -1  -3   1 1481.65   94.19
   1  -3  -1 1455.65   93.59
  -1   3   1 1587.04   93.99
   1   3  -1 1439.46   93.99
  -1   3   1 1626.04   94.19
   1   3  -1 1483.95   93.79
  -1  -3  -1  790.82   50.29
  -1  -3  -1  740.03   50.59
   1   3   1  825.82   50.49
   1   3   1  861.41   50.19
  -3  -3  -1  173.28   12.90
  -3  -3  -1  170.48   12.20
  -3  -3  -1  204.48   12.20
  -3  -3  -1  177.58   12.30
  -3  -3  -1  204.88   11.90
   3   3   1  186.08   12.00
   3   3   1  189.38   12.30
  -3   3  -1  160.28   11.80
  -3   3  -1  198.18   12.70
   3   3   1  170.78   12.60
  -5  -3  -1  351.86   21.40
  -5  -3  -1  361.06   21.80
  -5  -3  -1  302.97   22.20
  -5  -3  -1  325.17   21.50
   5  -3   1  329.17   21.10
  -5  -3  -1  311.17   21.70
  -5  -3  -1  328.27   22.10
  -5  -3  -1  336.47   22.00
  -5   3  -1  341.17   21.40
   5   3   1  328.57   21.30
  -5   3  -1  377.86   22.70
  -5   3  -1  305.87   21.70
   5   3   1  308.17   20.90
   5   3   1  333.07   22.50
  -5   3  -1  342.27   21.40
   5   3   1  325.47   21.80
  -7  -3  -1  132.89   10.10
  -7  -3  -1  148.09   11.80
  -7  -3  -1  153.38   10.80
   7  -3   1  165.68   10.50
  -7  -3  -1  139.89   10.90
  -7  -3  -1  124.49   10.30
   7  -3   1  132.19    9.70
  -7   3  -1  143.79   10.50
   7   3   1  145.19   12.30
  -7   3  -1  138.09   10.30
   7   3   1  157.98   11.20
   7   3   1  143.69    9.70
   7   3   1  138.89    9.70
  -7   3  -1  122.39   10.00
   7   3   1  152.88    9.80
  -7   3  -1  142.79    9.90
  -7   3  -1  159.18   10.40
   7   3   1  136.29   10.30
  -7   3  -1  154.98   11.00
  -7   3  -1  171.48   11.60
  -7   3  -1  145.69   10.50
  -7   3  -1  144.49   10.70
  -7   3  -1  165.68    9.90
  -7   3  -1  141.99   10.00
  -9  -3  -1  203.98   14.30
  -9  -3  -1  197.68   15.10
   9  -3   1  216.28   16.10
  -9  -3  -1  202.08   15.20
  -9  -3  -1  190.68   14.10
   9  -3   1  201.48   13.50
   9  -3   1  209.28   14.80
  -9  -3  -1  203.28   14.00
   9  -3   1  213.78   14.10
  -9  -3  -1  179.78   15.60
  -9   3  -1  215.28   14.30
  -9   3  -1  218.18   13.80
   9   3   1  212.48   17.40
   9   3   1  204.58   13.70
   9   3   1  198.08   13.70
  -9   3  -1  235.88   15.90
  -9   3  -1  187.48   13.70
   9   3   1  194.78   14.40
  -9   3  -1  192.48   14.60
  -9   3  -1  218.98   15.40
  -9   3  -1  199.58   14.00
  -9   3  -1  235.98   14.80
   9   3   1  200.28   13.60
   9   3   1  201.98   15.10
  -9   3  -1  220.88   14.30
  11  -3   1   10.50    4.30
  11  -3   1    7.60    1.90
 -11  -3  -1    3.70    2.60
  11  -3   1    9.50    2.00
  11  -3   1    8.50    2.70
 -11  -3  -1    6.90    3.30
 -11  -3  -1    6.90    2.40
 -11  -3  -1    9.10    3.70
 -11  -3  -1    6.80    2.40
 -11  -3  -1    6.10    3.90
  11   3   1    6.20    2.10
 -11   3  -1    8.90    2.90
  11   3   1    6.70    2.10
 -11   3  -1    6.20    2.60
  11   3   1    5.70    3.10
 -11   3  -1   18.30    5.70
 -11   3  -1    5.50    3.10
  11   3   1    5.10    3.30
  11   3   1    5.30    1.70
 -11   3  -1    8.80    3.00
  12  -4  -1  219.58   14.10
 -12  -4   1  227.48   14.30
 -12  -4   1  207.98   14.20
 -12  -4   1  212.58   14.30
  12   4  -1  219.88   14.10
 -12   4   1  207.78   14.30
  12   4  -1  228.68   14.00
  12   4  -1  217.78   14.10
 -12   4   1  225.58   14.60
 -10  -4   1  472.35   30.40
 -10  -4   1  481.85   31.10
 -10  -4   1  496.15   30.00
 -10  -4   1  436.56   31.00
 -10  -4   1  485.35   31.10
  10  -4  -1  475.85   30.40
 -10  -4   1  413.26   31.40
 -10  -4   1  415.06   30.20
  10  -4  -1  484.25   29.90
  10   4  -1  468.05   29.80
  10   4  -1  476.35   29.90
 -10   4   1  442.66   30.50
 -10   4   1  445.16   30.60
 -10   4   1  491.25   30.50
  10   4  -1  454.55   31.00
  10   4  -1  519.15   29.80
  10   4  -1  472.65   30.90
 -10   4   1  451.75   30.00
 -10   4   1  497.25   30.70
 -10   4   1  451.25   30.30
 -10   4   1  524.95   29.90
 -10   4   1  456.55   31.70
  -8  -4   1 1227.08   76.79
  -8  -4   1 1264.87   76.49
   8  -4  -1 1180.28   77.49
  -8  -4   1 1304.67   77.19
   8  -4  -1 1123.89   75.89
  -8  -4   1 1265.37   77.19
  -8  -4   1 1243.68   77.39
   8  -4  -1 1277.37   76.59
  -8  -4   1 1180.98   76.69
   8   4  -1 1241.48   77.49
  -8   4   1 1235.18   76.59
  -8   4   1 1252.07   78.19
  -8   4   1 1170.18   75.99
  -8   4   1 1220.38   76.59
   8   4  -1 1138.69   75.79
  -8   4   1 1185.88   76.59
  -8   4   1 1336.77   76.09
  -8   4   1 1122.19   75.89
  -8   4   1 1243.48   76.59
   8   4  -1 1124.19   75.79
   8   4  -1 1173.28   76.49
  -8   4   1 1243.68   76.79
  -8   4   1 1247.28   77.19
   8   4  -1 1156.38   78.69
  -8   4   1 1269.27   76.49
   8   4  -1 1157.38   75.89
  -6  -4   1  168.98   11.60
  -6  -4   1  152.38   11.80
  -6  -4   1  154.98   12.00
  -6  -4   1  161.78   11.10
   6  -4  -1  157.08   10.70
  -6  -4   1  153.48   11.40
  -6   4   1  171.28   10.80
  -6   4   1  165.28   11.20
  -6   4   1  163.68   11.10
  -6   4   1  164.18   12.60
   6   4  -1  156.08   11.70
  -6   4   1  165.48   11.30
   6   4  -1  144.39   10.40
   6   4  -1  142.29   10.90
   6   4  -1  163.28   10.50
  -6   4   1  167.48   11.10
  -6   4   1  139.09   11.00
   6   4  -1  154.18   12.70
  -6   4   1  158.98   10.70
  -6   4   1  163.28   11.30
  -4  -4   1 1259.57   75.99
  -4  -4   1 1219.18   76.19
  -4  -4   1 1205.08   76.39
  -4  -4   1 1117.39   76.29
  -4  -4   1 1111.69   76.19
  -4  -4   1 1238.58   76.49
  -4  -4   1 1224.98   75.89
  -4  -4   1 1150.68   76.99
   4   4  -1 1150.98   75.59
  -4   4   1 1266.77   76.09
  -4   4   1 1259.37   75.99
  -4   4   1 1272.77   75.99
   4   4  -1 1229.78   75.89
   4   4  -1 1153.48   76.89
   4   4  -1 1227.88   76.39
  -4   4   1 1381.46   77.09
  -2  -4   1 3058.19  189.88
  -2  -4   1 3078.59  189.28
  -2  -4   1 3043.10  188.88
  -2  -4   1 3036.30  189.08
  -2  -4   1 2762.42  189.08
  -2  -4   1 3222.38  189.38
   2   4  -1 3234.68  189.18
  -2   4   1 3388.56  189.58
   2   4  -1 2894.51  189.48
  -2   4   1 2827.02  188.88
  -2   4   1 3009.20  188.98
  -2   4   1 2999.50  189.08
   2   4  -1 3073.39  188.88
   0  -4  -1 2529.05  159.58
   0  -4  -1 2627.14  159.28
   0  -4   1 2707.13  159.28
   0  -4   1 2489.55  159.48
   0   4  -1 2914.01  159.48
   0   4   1 2411.16  159.08
   0   4   1 2610.54  159.18
   0   4   1 2251.27  159.28
  -2  -4  -1  461.05   32.60
  -2  -4  -1  470.85   32.50
  -2  -4  -1  617.74   32.70
  -2  -4  -1  501.65   33.20
  -2   4  -1  462.95   32.70
   2   4   1  571.04   33.00
  -4  -4  -1   44.80    4.80
  -4  -4  -1   50.69    6.50
   4   4   1   57.29    4.70
   4   4   1   55.49    4.50
   4   4   1   52.79    3.80
   4   4   1   54.39    5.70
   4   4   1   56.99    4.90
  -4   4  -1   40.50    3.90
  -4   4  -1   43.30    4.80
  -4   4  -1   37.50    3.90
  -6  -4  -1   24.60    4.30
  -6  -4  -1   20.20    3.50
  -6  -4  -1   18.30    3.30
   6  -4   1   16.90    2.50
  -6  -4  -1   24.90    4.70
  -6   4  -1   21.30    3.90
  -6   4  -1   18.00    2.60
   6   4   1   14.90    3.10
   6   4   1   18.60    2.50
  -6   4  -1   17.30    2.80
   6   4   1   19.60    2.40
   6   4   1   19.00    4.70
   6   4   1   20.70    3.80
  -6   4  -1   20.00    3.10
  -6   4  -1   15.30    3.40
  -6   4  -1   18.90    3.10
   6   4   1   18.30    3.70
  -6   4  -1   18.50    3.80
  -6   4  -1   20.50    3.00
  -6   4  -1   17.40    2.90
   8  -4   1  805.62   49.50
  -8  -4  -1  786.52   50.29
   8  -4   1  815.52   50.49
   8  -4   1  702.33   49.00
  -8  -4  -1  778.32   49.60
  -8  -4  -1  688.23   49.60
  -8  -4  -1  801.82   51.09
  -8  -4  -1  747.33   50.39
  -8  -4  -1  728.53   49.70
  -8   4  -1  824.62   49.80
   8   4   1  739.23   49.60
  -8   4  -1  839.52   49.30
  -8   4  -1  886.21   51.39
   8   4   1  772.12   49.00
  -8   4  -1  714.63   50.49
  -8   4  -1  838.62   50.59
   8   4   1  747.63   49.99
  -8   4  -1  882.11   49.10
  -8   4  -1  775.02   49.20
  -8   4  -1  781.72   49.80
   8   4   1  780.72   48.90
  -8   4  -1  768.82   49.50
   8   4   1  763.22   51.79
   8   4   1  735.93   48.90
  10  -4   1   75.69    5.50
 -10  -4  -1   70.69    5.90
 -10  -4  -1   70.19    7.40
 -10  -4  -1   80.39    6.30
 -10  -4  -1   65.99    7.80
 -10  -4  -1   78.79    7.70
 -10  -4  -1   72.89    6.20
  10  -4   1   65.69    6.20
 -10  -4  -1   67.29    7.10
 -10   4  -1   80.79    6.20
 -10   4  -1   75.39    6.40
  10   4   1   74.89    7.00
 -10   4  -1   76.99    7.40
 -10   4  -1   73.49    6.10
 -10   4  -1   71.19    6.80
  10   4   1   77.79    5.60
  10   4   1   62.69    5.60
 -10   4  -1   71.09    6.60
 -10   4  -1   75.29    7.50
  10   4   1   66.89    5.80
 -12  -4  -1  290.37   19.50
 -12  -4  -1  305.17   19.60
 -12  -4  -1  311.57   19.60
 -12  -4  -1  280.77   19.70
 -12   4  -1  317.87   19.70
 -12   4  -1  346.57   19.70
  12   4   1  328.37   19.40
 -12   4  -1  317.17   19.80
  12   4   1  297.17   19.40
 -12   4  -1  264.07   19.30
 -11  -5   1   14.00    2.60
 -11  -5   1   16.10    3.10
 -11  -5   1    7.70    3.80
 -11  -5   1   17.60    4.00
  11   5  -1   17.30    2.80
  11   5  -1   15.30    2.30
  11   5  -1    8.80    2.00
 -11   5   1   12.80    2.70
  11   5  -1   11.90    3.00
  -9  -5   1   13.60    4.60
  -9  -5   1   10.40    2.80
  -9  -5   1   19.60    5.80
   9  -5  -1   14.10    2.80
  -9  -5   1   22.20    5.40
   9  -5  -1    8.10    3.60
  -9  -5   1    9.80    3.50
  -9  -5   1    9.20    4.20
  -9   5   1   13.20    3.20
  -9   5   1   12.20    3.90
   9   5  -1   15.40    3.60
   9   5  -1   16.00    2.60
   9   5  -1    8.10    6.90
  -9   5   1    5.80    2.70
  -9   5   1   14.30    2.60
  -9   5   1    9.30    2.10
  -9   5   1   11.60    2.90
   9   5  -1    9.90    2.30
  -9   5   1   14.80    3.90
   9   5  -1   13.00    3.90
  -9   5   1   14.20    2.70
  -9   5   1   10.70    3.30
  -9   5   1   16.70    3.80
   9   5  -1   15.20    2.80
  -9   5   1   15.50    3.70
   7  -5  -1  318.87   21.10
   7  -5  -1  313.27   21.80
  -7  -5   1  334.77   21.40
   7   5  -1  338.07   22.40
   7   5  -1  310.47   20.70
  -7   5   1  357.06   23.20
  -7   5   1  367.86   21.70
  -7   5   1  300.47   21.40
   7   5  -1  318.87   23.60
  -7   5   1  317.17   21.80
   7   5  -1  320.77   21.80
  -7   5   1  318.67   21.10
  -7   5   1  329.57   21.50
  -7   5   1  304.57   20.90
   7   5  -1  312.97   21.50
   7   5  -1  343.07   20.90
  -7   5   1  357.86   21.10
  -7   5   1  332.67   21.50
   7   5  -1  331.87   20.90
  -7   5   1  349.87   21.40
  -7   5   1  307.97   21.60
  -7   5   1  318.97   21.60
  -7   5   1  282.17   21.00
  -7   5   1  303.97   21.40
  -5  -5   1  143.89   10.10
  -5  -5   1  128.29   10.20
  -5  -5   1  146.89   10.10
  -5  -5   1  145.59   10.50
  -5  -5   1  139.29   10.60
  -5  -5   1  147.29   11.00
  -5  -5   1  146.39   12.20
  -5   5   1  149.49   10.00
  -5   5   1  151.18   10.20
   5   5  -1  138.69   11.50
  -5   5   1  154.48   11.40
  -5   5   1  156.78   10.00
   5   5  -1  132.19    9.50
   5   5  -1  138.59   10.10
   5   5  -1  141.69   10.60
  -3  -5   1   47.20    5.80
  -3  -5   1   43.60    4.40
  -3  -5   1   53.19    4.40
  -3  -5   1   61.09    4.70
  -3  -5   1   44.00    4.50
  -3  -5   1   59.39    5.90
  -3  -5   1   45.20    4.90
   3   5  -1   48.10    5.30
   3   5  -1   54.39    4.40
   3   5  -1   42.10    4.40
  -3   5   1   49.10    4.30
  -3   5   1   57.39    4.10
  -3   5   1   45.40    4.00
   3   5  -1   44.10    4.50
  -3   5   1   50.99    5.30
  -1  -5   1  186.78   12.10
  -1  -5   1  173.98   12.20
  -1  -5   1  176.18   12.00
   1  -5  -1  183.18   12.30
   1  -5  -1  176.18   11.90
  -1  -5   1  188.18   12.90
   1   5  -1  213.58   12.80
  -1   5   1  177.38   12.10
  -1   5   1  186.78   11.80
   1   5  -1  171.08   11.70
   1  -5   1  276.77   18.40
  -1  -5  -1  296.27   18.50
  -1  -5  -1  302.27   18.70
  -1  -5  -1  281.07   19.20
  -1  -5  -1  282.17   18.50
   1   5   1  318.17   18.80
  -1   5  -1  261.47   18.50
   1   5   1  275.27   18.40
  -1   5  -1  295.07   18.60
   1   5   1  280.97   19.40
  -3  -5  -1  323.97   20.70
  -3  -5  -1  321.47   21.50
  -3  -5  -1  303.27   20.50
  -3  -5  -1  323.37   20.30
  -3   5  -1  333.27   20.90
  -3   5  -1  278.07   19.90
   3   5   1  336.67   20.10
   3   5   1  306.87   20.90
  -3   5  -1  291.27   19.80
  -5  -5  -1   41.30    4.80
  -5  -5  -1   40.30    6.90
   5   5   1   38.00    3.40
   5   5   1   33.50    5.50
  -5   5  -1   31.70    4.20
  -5   5  -1   36.70    3.60
   5   5   1   41.40    4.00
   5   5   1   36.90    4.60
  -5   5  -1   44.60    5.00
   5   5   1   41.60    4.20
  -5   5  -1   40.60    5.00
  -7  -5  -1  294.77   21.10
   7   5   1  328.77   23.60
  -7   5  -1  328.37   21.30
  -7   5  -1  344.27   21.50
  -7   5  -1  339.97   22.10
   7   5   1  343.77   21.50
   7   5   1  307.07   20.70
   7   5   1  314.57   20.60
  -7   5  -1  330.47   20.80
  -7   5  -1  300.57   21.20
  -7   5  -1  343.67   21.30
   7   5   1  328.77   21.70
  -7   5  -1  323.37   20.90
  -7   5  -1  315.57   20.90
  -7   5  -1  300.47   21.00
   7   5   1  348.37   20.70
  -7   5  -1  330.17   21.10
  -7   5  -1  289.07   21.30
  -9  -5  -1   85.29    9.80
  -9  -5  -1   90.29    7.70
  -9  -5  -1   96.29    9.40
   9  -5   1  117.69    8.10
  -9  -5  -1  113.89    9.20
  -9  -5  -1  105.49   10.20
  -9  -5  -1  106.19    8.40
  -9  -5  -1   93.89    7.90
   9   5   1  108.29    8.90
  -9   5  -1  117.19    8.40
  -9   5  -1  109.49    9.10
  -9   5  -1  118.69    7.90
  -9   5  -1   98.79    8.60
  -9   5  -1  112.79    8.20
   9   5   1  102.49    7.50
  -9   5  -1  120.49    9.80
  -9   5  -1  123.09    8.10
  -9   5  -1  105.39    7.70
   9   5   1  102.99    7.70
   9   5   1   80.79   12.10
  -9   5  -1  112.99    8.70
   9   5   1  106.59    7.70
  11  -5   1   21.00    4.10
  11  -5   1   22.50    2.80
 -11  -5  -1   29.30    3.20
 -11  -5  -1   19.30    2.90
 -11  -5  -1   25.50    4.20
 -11  -5  -1   24.40    4.00
 -11  -5  -1   30.40    3.60
 -11  -5  -1   27.20    4.50
 -11   5  -1   27.70    4.60
 -11   5  -1   25.30    3.50
 -11   5  -1   27.70    4.20
 -11   5  -1   21.70    3.40
  11   5   1   21.10    4.20
 -11   5  -1   19.80    3.00
  11   5   1   24.90    3.30
  11   5   1   23.70    3.20
  11   5   1   32.90    4.20
 -10  -6   1   85.49    6.30
 -10   6   1   72.09    6.10
 -10   6   1   60.79    6.20
  10   6  -1   82.19    5.90
  10   6  -1   86.09    5.80
  10   6  -1   69.79    7.20
  10   6  -1   65.69    5.50
 -10   6   1   66.69    6.50
  -8  -6   1   13.40    3.00
  -8  -6   1   16.30    4.10
  -8  -6   1   20.10    4.20
  -8  -6   1   12.20    3.60
  -8   6   1    7.50    2.30
  -8   6   1   14.30    2.70
  -8   6   1   11.10    4.00
   8   6  -1   16.90    6.90
  -8   6   1   11.40    3.30
  -8   6   1   11.70    2.90
   8   6  -1   10.80    2.30
  -8   6   1    4.50    2.90
   8   6  -1   13.30    2.50
  -8   6   1   10.40    3.30
  -8   6   1   12.90    2.70
   8   6  -1    7.40    3.00
  -8   6   1   12.60    3.60
  -8   6   1   11.40    3.40
   8   6  -1   11.60    2.10
  -8   6   1   14.50    2.80
  -6  -6   1  389.86   28.20
  -6   6   1  386.16   27.20
   6   6  -1  429.06   26.80
   6   6  -1  396.46   27.50
  -6   6   1  488.05   27.30
   6   6  -1  431.46   26.80
  -6   6   1  434.16   27.50
  -6   6   1  481.25   27.60
  -6   6   1  479.45   27.80
   6   6  -1  409.86   29.50
   6   6  -1  387.56   26.80
   6   6  -1  417.06   27.50
  -6   6   1  409.96   27.70
  -6   6   1  417.96   27.30
  -6   6   1  446.96   29.30
   6   6  -1  456.85   28.40
  -6   6   1  420.66   27.20
  -6   6   1  402.76   27.50
  -6   6   1  392.26   27.30
  -6   6   1  397.06   27.20
  -4  -6   1  273.17   21.00
  -4  -6   1  289.57   18.90
  -4  -6   1  321.07   19.40
  -4  -6   1  294.47   20.10
  -4  -6   1  308.97   19.70
  -4  -6   1  329.17   20.20
  -4  -6   1  296.27   19.80
  -4  -6   1  298.37   19.50
  -4   6   1  274.97   19.40
   4   6  -1  288.97   18.90
  -4   6   1  314.17   20.60
   4   6  -1  304.27   19.80
   4   6  -1  296.97   19.30
  -4   6   1  288.57   19.20
  -4   6   1  282.57   19.20
  -2  -6   1   89.89    6.60
  -2  -6   1  101.89    6.40
  -2  -6   1  102.69    6.60
   2  -6  -1   71.09    6.50
  -2  -6   1   68.69    6.70
  -2  -6   1   73.39    7.70
   2   6  -1   94.79    6.30
   2   6  -1   84.69    7.50
   0  -6   1    0.60    1.40
   0  -6  -1    2.80    1.90
   0  -6  -1    3.70    2.60
   0  -6   1    1.40    2.40
   0  -6  -1    2.70    1.90
   0  -6   1    0.00    1.40
   0  -6   1   -0.60    1.60
   0  -6  -1    6.40    2.00
   0   6   1    2.30    2.30
   0   6   1    3.30    1.50
   0   6  -1   -0.60    1.90
  -2  -6  -1  379.06   20.90
  -2  -6  -1  361.66   21.80
  -2  -6  -1  386.46   21.50
   2  -6   1  286.67   21.00
  -2  -6  -1  289.07   22.20
  -2  -6  -1  316.57   21.30
   2  -6   1  301.97   20.80
   2   6   1  344.67   21.90
  -2   6  -1  299.67   20.80
  -2   6  -1  308.87   21.20
  -2   6  -1  351.46   21.70
  -4  -6  -1  883.61   53.49
  -4  -6  -1  850.31   54.29
  -4  -6  -1  839.02   53.39
  -4  -6  -1  904.61   53.09
  -4  -6  -1  852.71   53.19
  -4  -6  -1  861.61   52.79
  -4  -6  -1  882.61   52.69
  -4  -6  -1  873.51   52.29
   4   6   1  848.92   52.29
  -4   6  -1  710.13   52.29
  -4   6  -1  869.41   53.69
   4   6   1  835.82   53.79
   4   6   1  892.21   52.79
  -4   6  -1  728.33   52.59
  -4   6  -1  740.93   52.29
  -6  -6  -1  498.85   31.20
  -6   6  -1  433.06   30.20
  -6   6  -1  511.65   30.70
   6   6   1  517.75   30.00
  -6   6  -1  519.65   32.00
  -6   6  -1  424.26   30.40
   6   6   1  508.25   29.80
  -6   6  -1  435.86   30.10
   6   6   1  482.25   30.60
  -6   6  -1  475.65   30.30
  -6   6  -1  472.75   32.00
  -6   6  -1  480.25   31.10
   6   6   1  513.45   29.90
  -6   6  -1  419.46   30.30
  -6   6  -1  494.45   30.40
  -6   6  -1  453.75   30.40
  -6   6  -1  394.36   30.00
  -8  -6  -1  411.26   26.90
  -8  -6  -1  367.56   26.90
  -8  -6  -1  368.56   26.40
  -8  -6  -1  359.96   26.00
  -8  -6  -1  405.36   27.80
  -8   6  -1  411.96   26.20
   8   6   1  388.16   25.40
  -8   6  -1  387.76   25.60
  -8   6  -1  406.06   26.20
   8   6   1  386.66   26.40
  -8   6  -1  441.86   27.00
   8   6   1  381.26   25.50
  -8   6  -1  430.66   25.80
  -8   6  -1  406.26   25.50
   8   6   1  409.26   25.40
   8   6   1  360.76   29.30
  -8   6  -1  406.36   25.80
  -8   6  -1  449.16   26.20
  -8   6  -1  398.66   26.10
   8   6   1  393.26   26.10
 -10  -6  -1  109.59    9.20
 -10  -6  -1  132.29    9.80
 -10  -6  -1  126.89    8.40
 -10   6  -1   93.49    7.80
 -10   6  -1  116.39    8.70
  10   6   1   96.69   10.70
  10   6   1  104.09    7.80
 -10   6  -1  110.49    8.40
 -10   6  -1  125.99    8.40
  10   6   1  102.09    8.90
 -11  -7   1  169.88   11.10
 -11  -7   1  142.39   11.30
 -11  -7   1  167.88   11.10
 -11   7   1  164.38   11.80
  11   7  -1  174.48   10.80
 -11   7   1  144.29   11.20
  11   7  -1  158.88   10.70
 -11   7   1  176.48   11.30
 -11   7   1  191.48   11.20
  -9  -7   1   35.10    5.20
  -9  -7   1   24.20    4.10
  -9  -7   1   39.10    5.70
  -9  -7   1   32.70    4.60
  -9  -7   1   30.60    4.30
  -9   7   1   26.50    4.60
  -9   7   1   22.30    3.70
   9   7  -1   25.00    3.40
   9   7  -1   20.30    3.40
  -9   7   1   22.90    3.90
   9   7  -1   25.20    4.40
   9   7  -1   19.10    3.10
  -9   7   1   30.80    4.30
  -7  -7   1  828.72   49.10
  -7  -7   1  720.43   48.00
  -7  -7   1  776.12   47.80
  -7  -7   1  765.52   48.30
   7   7  -1  650.53   49.99
  -7   7   1  788.42   47.80
   7   7  -1  699.03   46.80
  -7   7   1  856.71   49.50
  -7   7   1  769.52   47.40
  -7   7   1  768.02   48.00
  -7   7   1  737.83   47.20
  -7   7   1  755.92   47.80
   7   7  -1  694.63   46.70
  -7   7   1  724.33   47.70
  -7   7   1  699.53   47.30
  -7   7   1  826.12   47.20
  -7   7   1  762.92   47.50
  -7   7   1  742.43   47.30
  -7   7   1  737.73   47.20
   7   7  -1  692.23   47.60
  -7   7   1  712.73   47.40
  -7   7   1  760.22   49.70
  -7   7   1  713.53   47.40
   7   7  -1  728.13   46.80
  -5  -7   1  145.39   14.00
  -5  -7   1  158.88   12.30
  -5  -7   1  165.98   11.30
  -5   7   1  181.58   11.00
  -5   7   1  167.38   11.40
  -5   7   1  145.29   11.00
  -5   7   1  161.48   10.80
  -5   7   1  146.09   11.20
   5   7  -1  157.68   10.30
   5   7  -1  155.78   11.10
   5   7  -1  166.78   10.80
  -5   7   1  136.69   10.80
   5   7  -1  178.68   11.10
  -5   7   1  157.28   10.90
  -5   7   1  164.88   12.60
   5   7  -1  155.38   11.00
  -5   7   1  134.09   10.80
  -5   7   1  158.78   11.20
   5   7  -1  158.18   13.50
  -5   7   1  144.99   11.30
  -5   7   1  148.29   10.80
  -5   7   1  156.68   10.90
   5   7  -1  169.18   10.40
  -3  -7   1   43.30    4.30
  -3  -7   1   46.20    4.60
  -3  -7   1   52.79    5.10
   3  -7  -1   35.10    3.50
  -3  -7   1   50.49    3.70
  -3  -7   1   41.50    4.90
  -3  -7   1   37.10    5.90
  -3   7   1   53.59    5.40
   3   7  -1   45.50    6.30
  -3   7   1   39.50    3.60
  -3   7   1   43.60    4.20
   3   7  -1   41.40    4.10
   1  -7  -1  647.74   41.10
  -1  -7   1  662.33   41.70
  -1  -7   1  579.14   41.10
  -1  -7   1  645.04   42.40
   1  -7  -1  651.83   41.40
  -1  -7   1  595.04   41.20
  -1  -7   1  739.13   42.80
   1  -7  -1  636.74   41.30
   1  -7  -1  646.54   41.90
  -1  -7   1  621.04   41.50
  -1  -7   1  649.04   41.40
  -1   7   1  736.93   42.20
   1   7  -1  689.33   42.00
  -1   7   1  663.63   41.50
   1  -7   1  543.15   33.20
  -1  -7  -1  508.05   34.30
   1  -7   1  505.65   33.60
   1  -7   1  477.75   32.70
   1  -7   1  464.35   32.80
  -1  -7  -1  548.65   33.20
  -1  -7  -1  549.45   33.60
  -1  -7  -1  535.85   32.70
  -1   7  -1  496.65   33.40
   1   7   1  588.34   34.40
  -3  -7  -1  171.68   11.90
  -3  -7  -1  178.08   11.20
  -3  -7  -1  177.78   12.00
  -3  -7  -1  163.48   13.40
  -3  -7  -1  180.28   11.60
  -3  -7  -1  177.38   12.40
  -3  -7  -1  179.38   12.30
  -3  -7  -1  167.98   12.00
   3   7   1  154.88   12.80
   3   7   1  176.98   11.80
  -3   7  -1  147.39   11.20
  -3   7  -1  172.78   12.40
  -5  -7  -1  666.93   41.40
  -5  -7  -1  646.74   41.60
  -5  -7  -1  623.44   40.50
  -5  -7  -1  654.03   40.70
  -5  -7  -1  657.53   41.30
  -5  -7  -1  654.73   41.20
  -5  -7  -1  632.64   42.70
   5   7   1  622.44   40.40
   5   7   1  649.64   40.70
   5   7   1  641.34   39.90
  -5   7  -1  623.14   40.20
  -5   7  -1  652.73   40.80
  -5   7  -1  614.64   40.30
  -5   7  -1  589.24   41.40
  -5   7  -1  583.74   40.30
  -5   7  -1  610.44   40.40
   5   7   1  649.43   39.90
  -5   7  -1  574.64   40.90
   5   7   1  668.83   40.60
   5   7   1  589.74   42.10
  -5   7  -1  650.73   40.80
  -5   7  -1  676.43   40.60
  -5   7  -1  715.03   41.40
   5   7   1  722.03   40.30
  -5   7  -1  538.05   40.40
  -5   7  -1  680.23   40.90
  -5   7  -1  694.33   40.50
  -5   7  -1  567.14   40.10
  -7   7  -1   89.59    8.70
  -7   7  -1   88.69    7.30
  -7   7  -1   96.79    9.10
  -7   7  -1   93.89    7.90
   7   7   1   96.39    8.20
   7   7   1  112.59    7.10
   7   7   1  103.89    8.00
  -7   7  -1   82.99    7.60
  -7   7  -1   99.49    8.60
  -7   7  -1   93.19    7.60
  -7   7  -1   98.09    7.90
  -7   7  -1  104.39    8.10
   7   7   1  112.69   13.30
   7   7   1  117.39    7.40
  -7   7  -1  108.99    7.50
  -9  -7  -1  136.79   11.00
  -9  -7  -1  134.09   10.50
  -9  -7  -1  141.69   10.70
  -9  -7  -1  139.49    9.80
  -9  -7  -1  145.09   11.50
  -9   7  -1  125.29    9.30
   9   7   1  150.08    9.40
  -9   7  -1  152.38    9.40
  -9   7  -1  146.79   10.00
   9   7   1  129.09    9.20
  -9   7  -1  114.29    9.00
  -9   7  -1  126.69   10.30
   9   7   1  115.39   10.30
   9   7   1  116.89    9.00
  -9   7  -1  133.59   10.70
  -9   7  -1  123.79    9.50
   9   7   1  136.89   10.40
  -9   7  -1  133.89    9.80
 -11  -7  -1   22.70    3.30
 -11  -7  -1   21.80    2.70
 -11  -7  -1   21.80    3.20
  11   7   1   16.20    2.10
  11   7   1   14.30    2.30
 -11   7  -1   14.00    3.00
 -11   7  -1   18.50    2.60
 -10  -8   1    2.30    3.00
 -10  -8   1    2.60    5.00
 -10  -8   1    2.80    4.10
 -10  -8   1    5.10    2.90
 -10  -8   1    2.80    2.00
 -10   8   1    3.30    2.90
 -10   8   1    0.20    2.30
  10   8  -1    2.90    1.70
 -10   8   1    4.40    1.80
  10   8  -1    2.90    1.50
 -10   8   1    2.20    2.20
 -10   8   1    5.00    1.90
  -8  -8   1  832.42   57.39
  -8  -8   1  912.31   57.79
  -8  -8   1  945.71   58.69
  -8  -8   1  843.72   57.89
   8   8  -1  922.41   57.09
  -8   8   1  952.70   56.69
   8   8  -1  894.01   56.39
   8   8  -1  861.31   56.39
  -8   8   1  944.11   58.69
  -8   8   1  894.81   56.99
  -8   8   1  936.91   56.89
  -8   8   1  955.40   57.59
  -8   8   1  981.90   57.19
   8   8  -1  852.71   58.89
  -8   8   1  863.51   56.99
  -8   8   1  846.32   57.19
  -6  -8   1  108.59    8.70
  -6  -8   1  119.99    8.60
  -6  -8   1  104.29   10.40
  -6  -8   1  105.69    9.10
  -6  -8   1  127.59   10.30
  -6  -8   1  106.49    7.10
   6   8  -1   97.19    7.30
  -6   8   1   98.79    7.90
   6   8  -1   92.09    7.40
  -6   8   1  113.99    8.80
  -6   8   1   94.59    7.90
  -6   8   1   90.29    8.30
   6   8  -1  103.19    7.60
  -6   8   1  113.89   10.70
  -6   8   1  101.99    7.90
  -6   8   1  106.19    9.30
  -6   8   1  106.49    8.40
   6   8  -1  102.29    8.50
  -6   8   1   90.59    8.00
  -6   8   1  114.89    8.60
  -6   8   1  115.29    8.10
   6   8  -1  117.39    8.30
  -6   8   1  102.89   10.10
  -6   8   1  100.09    7.70
  -6   8   1   94.39    8.00
  -4  -8   1  554.14   34.50
  -4  -8   1  495.15   36.10
  -4  -8   1  517.35   33.50
  -4  -8   1  554.24   34.50
  -4  -8   1  501.65   34.10
  -4  -8   1  549.54   34.00
  -4  -8   1  565.04   34.90
  -4  -8   1  532.15   33.40
   4  -8  -1  488.55   33.30
  -4   8   1  552.84   34.30
  -4   8   1  509.45   33.90
  -4   8   1  514.95   33.70
  -4   8   1  526.55   33.80
   4   8  -1  524.05   33.30
  -4   8   1  536.65   34.30
   4   8  -1  503.55   34.00
  -4   8   1  524.65   33.70
   4   8  -1  614.14   33.50
  -4   8   1  482.75   33.60
  -4   8   1  532.95   33.80
  -4   8   1  533.35   34.30
  -4   8   1  510.35   34.10
  -4   8   1  582.84   35.40
   2  -8  -1  661.83   40.90
  -2  -8   1  624.44   41.20
   2  -8  -1  645.14   41.70
  -2  -8   1  584.94   41.40
  -2  -8   1  660.03   41.30
  -2  -8   1  660.33   42.90
  -2  -8   1  643.44   41.00
   2  -8  -1  633.44   41.10
  -2  -8   1  631.94   40.70
  -2  -8   1  703.13   42.00
  -2  -8   1  644.54   41.30
  -2   8   1  645.74   41.40
  -2   8   1  654.53   42.10
   2   8  -1  693.33   42.30
   0  -8  -1 2553.14  159.88
   0  -8   1 2566.54  160.28
   0  -8   1 2367.76  160.18
   0  -8  -1 2508.35  160.38
   0  -8  -1 2708.33  161.58
   0  -8  -1 2717.03  160.78
   0  -8   1 2754.32  160.78
   0  -8   1 2347.47  160.38
   0  -8   1 2586.34  161.48
   0  -8   1 2321.77  159.88
   0  -8  -1 2626.24  160.28
   0   8  -1 2675.63  160.78
   0   8   1 2784.52  161.38
   2  -8   1  230.18   15.20
  -2  -8  -1  231.68   14.90
   2  -8   1  213.68   14.80
  -2  -8  -1  242.48   15.20
  -2  -8  -1  241.78   17.20
  -2  -8  -1  238.88   15.60
   2  -8   1  229.38   15.80
  -2  -8  -1  248.88   16.00
  -2  -8  -1  237.78   16.00
  -2  -8  -1  236.08   15.60
   2  -8   1  211.08   15.00
  -2  -8  -1  233.78   15.60
   2   8   1  198.18   15.30
  -2   8  -1  218.08   15.80
   2   8   1  238.48   17.10
  -4  -8  -1  550.24   35.30
  -4  -8  -1  529.15   34.90
  -4  -8  -1  549.54   34.70
  -4  -8  -1  523.45   36.90
  -4  -8  -1  577.64   35.80
  -4  -8  -1  552.24   34.20
  -4   8  -1  521.95   34.90
   4   8   1  544.55   35.00
  -4   8  -1  536.15   34.80
   4   8   1  548.15   34.00
  -4   8  -1  522.65   34.40
   4   8   1  553.64   34.10
  -4   8  -1  530.15   34.60
  -4   8  -1  540.35   35.90
  -4   8  -1  565.04   35.30
  -4   8  -1  607.94   35.00
  -4   8  -1  486.95   34.70
  -4   8  -1  554.14   34.60
  -4   8  -1  546.05   36.60
  -4   8  -1  525.55   34.90
  -6  -8  -1  351.76   24.60
  -6  -8  -1  381.16   24.90
  -6  -8  -1  366.26   24.50
  -6  -8  -1  321.07   23.30
  -6  -8  -1  367.86   25.30
  -6  -8  -1  369.46   24.10
  -6  -8  -1  359.36   25.40
  -6   8  -1  335.27   23.70
  -6   8  -1  341.47   23.10
  -6   8  -1  334.67   23.40
   6   8   1  355.06   23.10
  -6   8  -1  370.76   23.50
   6   8   1  352.16   23.10
  -6   8  -1  379.36   23.80
   6   8   1  371.16   24.10
  -6   8  -1  387.46   25.00
   6   8   1  384.46   24.00
  -6   8  -1  393.86   24.70
  -6   8  -1  385.66   24.20
  -6   8  -1  348.57   23.30
  -6   8  -1  390.56   23.90
  -6   8  -1  362.76   23.70
   6   8   1  352.66   24.20
  -6   8  -1  339.87   23.70
  -6   8  -1  394.16   25.90
  -8  -8  -1  511.15   30.60
  -8  -8  -1  480.55   31.00
  -8  -8  -1  477.55   31.20
  -8   8  -1  492.45   31.40
  -8   8  -1  458.75   30.30
  -8   8  -1  490.65   30.80
   8   8   1  456.05   29.40
   8   8   1  501.45   32.30
  -8   8  -1  393.26   29.90
   8   8   1  454.25   30.00
  -8   8  -1  422.26   29.30
   8   8   1  470.15   29.40
  -8   8  -1  480.15   30.10
  -8   8  -1  442.06   29.80
  -8   8  -1  455.55   29.80
  -8   8  -1  460.75   29.50
  -8   8  -1  456.85   30.00
  -8   8  -1  472.95   29.80
 -10  -8  -1    3.50    4.40
 -10  -8  -1    4.20    3.10
 -10  -8  -1    4.40    4.00
 -10  -8  -1    3.20    1.80
 -10  -8  -1    3.30    4.50
 -10  -8  -1    3.00    2.50
 -10   8  -1    3.70    3.50
 -10   8  -1    3.80    2.40
 -10   8  -1    5.60    1.80
 -10   8  -1    2.00    2.00
  10   8   1    2.90    1.60
 -10   8  -1    2.80    2.40
  -9  -9   1   20.00    4.50
  -9  -9   1   22.60    4.80
  -9  -9   1   17.70    3.70
  -9  -9   1   17.10    4.40
  -9  -9   1   19.30    5.30
  -9   9   1   15.10    2.80
  -9   9   1   19.20    2.90
  -9   9   1   19.60    3.60
  -9   9   1   16.10    3.40
  -9   9   1   18.20    3.80
   9   9  -1   21.30    3.30
  -9   9   1   17.10    2.70
   9   9  -1   13.60    2.40
  -7  -9   1  403.46   27.90
  -7  -9   1  423.76   28.60
  -7  -9   1  415.76   28.20
  -7  -9   1  410.86   29.20
  -7   9   1  457.75   27.60
   7   9  -1  405.16   26.90
   7   9  -1  409.36   27.60
  -7   9   1  421.66   27.50
  -7   9   1  409.56   27.60
  -7   9   1  494.25   29.50
  -7   9   1  418.96   27.60
  -7   9   1  436.06   28.20
   7   9  -1  403.46   26.80
  -7   9   1  386.26   27.40
  -7   9   1  464.65   28.20
  -7   9   1  472.55   27.40
  -7   9   1  412.06   28.00
  -7   9   1  426.36   27.40
  -5  -9   1    3.90    1.70
  -5  -9   1    7.60    2.70
  -5  -9   1    1.30    2.50
  -5  -9   1    5.00    2.70
  -5  -9   1   10.30    4.00
  -5  -9   1    6.90    6.60
  -5  -9   1    3.50    2.20
  -5  -9   1    3.80    3.30
  -5   9   1    0.80    2.50
  -5   9   1   -0.70    2.70
  -5   9   1    0.90    2.10
  -5   9   1   -1.10    1.90
  -5   9   1    4.20    2.20
   5   9  -1    0.40    1.60
  -5   9   1    0.60    1.60
  -5   9   1   -0.20    3.10
  -5   9   1    0.40    1.80
  -5   9   1    3.30    2.40
  -5   9   1    1.40    2.40
  -5   9   1    1.50    1.90
   5   9  -1    2.20    2.60
  -3  -9   1  161.98   11.20
   3  -9  -1  161.28   10.90
  -3  -9   1  152.08   10.50
  -3  -9   1  156.78   10.70
  -3  -9   1  165.98   12.40
  -3  -9   1  151.78   13.70
  -3  -9   1  144.29   11.50
  -3  -9   1  168.28   11.70
  -3  -9   1  166.58   11.80
  -3  -9   1  175.38   12.50
   3  -9  -1  157.88   12.00
   3   9  -1  168.58   11.50
   3   9  -1  168.48   13.20
  -3   9   1  159.78   11.40
  -3   9   1  155.58   11.70
  -3   9   1  162.18   10.90
  -3   9   1  166.88   11.10
  -3   9   1  169.08   11.50
  -3   9   1  150.88   10.90
   3   9  -1  139.69   10.80
  -3   9   1  140.59   10.90
  -3   9   1  149.59   11.00
  -3   9   1  171.78   11.20
  -1  -9   1  438.16   25.50
  -1  -9   1  384.36   25.10
  -1  -9   1  421.86   26.10
  -1  -9   1  399.26   25.70
  -1  -9   1  390.76   25.70
   1  -9  -1  398.56   25.50
  -1  -9   1  444.66   25.90
   1  -9  -1  372.86   25.00
   1  -9  -1  363.26   25.60
   1  -9  -1  406.86   25.90
  -1   9   1  379.86   25.40
  -1   9   1  367.16   24.80
   1   9  -1  399.76   26.20
   1   9  -1  363.46   25.30
   1   9  -1  403.26   25.30
  -1   9   1  398.06   26.60
   1   9  -1  400.86   25.80
  -1   9   1  383.96   25.50
  -1   9   1  396.06   25.90
   1  -9   1  616.14   38.80
  -1  -9  -1  625.54   39.20
  -1  -9  -1  634.44   38.50
  -1  -9  -1  607.14   39.50
   1  -9   1  604.64   39.20
   1  -9   1  548.75   39.00
   1  -9   1  660.83   39.40
  -1  -9  -1  592.44   39.10
   1   9   1  626.94   39.00
  -1   9  -1  607.14   38.90
  -1   9  -1  613.04   39.60
   1   9   1  552.44   38.60
  -1   9  -1  661.33   39.60
   1   9   1  593.24   38.70
  -1   9  -1  546.65   38.80
  -1   9  -1  616.84   38.90
  -1   9  -1  598.44   38.20
   1   9   1  702.93   40.60
   1   9   1  636.84   39.30
  -1   9  -1  624.34   38.80
   1   9   1  596.64   38.70
  -3  -9  -1   32.00    5.40
  -3  -9  -1   26.00    4.40
  -3  -9  -1   29.50    3.20
  -3  -9  -1   15.50    5.60
  -3  -9  -1   18.60    4.30
  -3  -9  -1   30.70    4.00
   3   9   1   30.90    3.40
   3   9   1   25.70    4.50
  -3   9  -1   27.00    4.50
  -3   9  -1   28.40    3.40
  -3   9  -1   28.60    3.60
   3   9   1   26.00    3.50
  -3   9  -1   36.10    3.90
   3   9   1   21.10    6.30
  -3   9  -1   30.30    4.00
  -3   9  -1   36.90    3.60
  -3   9  -1   24.30    3.80
  -3   9  -1   20.00    3.50
  -5  -9  -1   56.49    6.30
  -5  -9  -1   50.79    5.60
  -5  -9  -1   53.29    7.10
  -5  -9  -1   69.49   11.30
  -5  -9  -1   51.89    4.30
  -5  -9  -1   56.49    6.40
  -5  -9  -1   58.39    6.90
  -5  -9  -1   53.99    5.50
  -5   9  -1   60.29    5.00
  -5   9  -1   53.19    5.00
  -5   9  -1   49.50    4.60
  -5   9  -1   50.99    4.80
   5   9   1   42.30    6.30
   5   9   1   43.80    4.30
  -5   9  -1   56.69    5.70
  -5   9  -1   53.59    6.80
  -5   9  -1   46.30    4.70
   5   9   1   55.49    6.30
  -5   9  -1   45.30    6.30
   5   9   1   50.99    4.50
  -5   9  -1   55.19    6.10
  -5   9  -1   53.99    6.30
  -5   9  -1   66.39    5.80
  -7  -9  -1  409.86   26.50
  -7  -9  -1  389.06   25.80
  -7  -9  -1  408.26   25.20
  -7  -9  -1  390.56   25.50
  -7   9  -1  321.07   24.50
  -7   9  -1  382.76   24.60
  -7   9  -1  383.46   24.10
  -7   9  -1  367.76   24.50
  -7   9  -1  365.46   24.90
  -7   9  -1  354.86   24.50
   7   9   1  340.37   23.80
  -7   9  -1  412.06   25.60
  -7   9  -1  418.06   25.20
  -7   9  -1  334.57   24.20
  -7   9  -1  402.36   24.30
  -7   9  -1  337.27   24.00
  -7   9  -1  390.56   24.50
   7   9   1  364.46   23.80
   7   9   1  389.86   24.60
  -9  -9  -1   40.40    6.10
  -9  -9  -1   28.10    5.20
  -9  -9  -1   30.70    4.80
  -9  -9  -1   33.50    4.50
  -9  -9  -1   38.00    5.50
  -9  -9  -1   31.30    6.10
  -9   9  -1   33.00    4.60
  -9   9  -1   30.40    4.20
   9   9   1   32.20    3.10
  -9   9  -1   30.30    5.20
  -9   9  -1   32.60    4.20
   9   9   1   33.90    4.20
 -10 -10   1   71.89    5.90
 -10 -10   1   82.59    5.80
 -10 -10   1   83.39    5.50
  10  10  -1   73.49    6.70
  -8 -10   1    4.60    4.60
  -8 -10   1    5.40    3.80
  -8 -10   1    3.90    3.10
  -8 -10   1    8.50    3.40
  -8  10   1    7.90    3.20
  -8  10   1    3.10    2.70
  -8  10   1    4.40    1.70
  -8  10   1    0.50    1.60
  -8  10   1    3.30    2.00
  -8  10   1    6.60    2.60
   8  10  -1    1.70    1.40
   8  10  -1    2.80    2.10
  -6 -10   1  377.06   24.70
  -6 -10   1  336.77   25.90
  -6 -10   1  406.06   24.30
  -6 -10   1  391.36   25.50
  -6 -10   1  372.46   24.30
  -6 -10   1  357.96   23.00
  -6  10   1  324.27   23.30
   6  10  -1  331.97   23.50
  -6  10   1  379.86   23.50
  -6  10   1  345.87   23.60
   6  10  -1  325.17   22.80
  -6  10   1  372.96   23.90
  -6  10   1  396.56   24.30
  -6  10   1  331.87   23.10
  -6  10   1  359.06   26.10
  -6  10   1  406.96   24.40
  -4 -10   1  185.88   14.00
  -4 -10   1  164.48   13.20
  -4 -10   1  170.48   12.00
  -4 -10   1  197.08   13.50
   4 -10  -1  167.28   13.00
  -4 -10   1  177.28   13.10
  -4 -10   1  162.08   15.70
  -4 -10   1  182.78   13.90
   4 -10  -1  166.28   12.90
  -4 -10   1  183.38   12.90
   4 -10  -1  175.28   12.20
   4 -10  -1  167.58   12.10
  -4 -10   1  184.68   12.90
   4  10  -1  168.88   12.40
  -4  10   1  204.28   12.70
  -4  10   1  210.18   13.20
  -4  10   1  150.58   13.40
  -4  10   1  189.88   14.50
   4  10  -1  153.18   14.90
  -4  10   1  203.78   14.00
  -4  10   1  186.48   12.90
  -4  10   1  187.38   12.80
  -2 -10   1  545.65   31.90
  -2 -10   1  483.55   30.70
  -2 -10   1  462.85   32.20
   2 -10  -1  494.45   31.20
   2 -10  -1  476.55   31.30
  -2 -10   1  532.45   31.30
  -2 -10   1  494.05   30.80
  -2 -10   1  443.76   33.40
  -2 -10   1  450.85   31.50
   2 -10  -1  470.45   32.30
   2 -10  -1  470.65   31.30
   2 -10  -1  481.15   30.60
  -2 -10   1  531.75   31.70
  -2 -10   1  560.54   32.40
  -2  10   1  499.55   31.00
   2  10  -1  437.96   30.70
   2  10  -1  511.75   30.90
  -2  10   1  478.45   31.50
   2  10  -1  494.15   31.40
  -2  10   1  473.95   32.30
  -2  10   1  497.55   31.10
   2  10  -1  441.36   32.20
  -2  10   1  485.55   31.10
  -2  10   1  483.95   31.40
  -2  10   1  424.36   30.80
  -2  10   1  476.15   32.50
   0 -10  -1   68.69    6.20
   0 -10   1   64.49    7.70
   0 -10   1   68.09    5.50
   0 -10  -1   72.19    5.00
   0 -10  -1   78.49    6.50
   0 -10   1   60.79    6.20
   0 -10   1   61.49    4.90
   0 -10  -1   68.59    5.90
   0 -10   1   59.99    5.80
   0 -10   1   56.19    5.70
   0 -10   1   60.19    7.60
   0 -10  -1   65.09    5.80
   0 -10  -1   60.89    7.70
   0 -10   1   62.69    5.90
   0  10  -1   59.69    5.30
   0  10   1   67.89    5.40
   0  10  -1   58.89    5.70
   0  10  -1   64.79    6.50
   0  10  -1   66.69    5.50
   0  10  -1   55.59    5.20
   0  10   1   64.59    4.90
   0  10   1   72.99    5.80
   0  10   1   77.09    9.40
   0  10  -1   59.69    4.80
   0  10   1   76.19    5.40
   0  10   1   61.89    5.40
  -2 -10  -1  996.00   60.69
  -2 -10  -1  961.40   60.49
  -2 -10  -1  941.81   62.39
   2 -10   1  925.41   60.39
   2 -10   1  921.71   61.29
   2 -10   1  949.80   59.99
  -2 -10  -1 1004.00   59.79
  -2 -10  -1  926.41   61.09
  -2 -10  -1  929.91   60.59
  -2 -10  -1  954.70   60.99
  -2 -10  -1  987.00   60.19
  -2  10  -1  916.31   61.09
   2  10   1  947.01   60.29
   2  10   1  920.81   59.79
  -2  10  -1  966.20   60.49
  -2  10  -1 1004.90   59.99
   2  10   1  970.40   61.99
  -2  10  -1  988.00   59.99
  -2  10  -1  912.91   60.29
  -2  10  -1  994.20   60.09
  -2  10  -1  961.70   60.09
  -2  10  -1  926.31   59.99
   2  10   1  929.91   59.89
  -4 -10  -1   30.10    3.30
  -4 -10  -1   23.90    4.90
  -4 -10  -1   27.90    4.80
  -4 -10  -1   37.70    5.40
  -4 -10  -1   35.20    8.10
  -4  10  -1   34.80    4.40
   4  10   1   23.30    4.00
  -4  10  -1   22.00    3.90
   4  10   1   23.90    6.60
   4  10   1   21.20    2.90
  -4  10  -1   26.80    3.70
  -4  10  -1   31.20    5.50
  -4  10  -1   28.00    3.80
  -4  10  -1   20.20    4.90
  -4  10  -1   28.20    4.30
  -6 -10  -1  524.55   33.20
  -6 -10  -1  458.95   33.80
  -6 -10  -1  533.65   31.80
  -6 -10  -1  499.15   32.10
  -6 -10  -1  533.35   32.50
  -6 -10  -1  508.45   30.50
  -6  10  -1  452.25   31.20
  -6  10  -1  518.85   31.00
  -6  10  -1  476.25   31.20
  -6  10  -1  410.76   30.90
  -6  10  -1  435.36   30.80
  -6  10  -1  463.05   31.30
  -6  10  -1  489.85   31.80
  -6  10  -1  483.45   31.00
  -6  10  -1  476.65   31.60
   6  10   1  457.85   31.30
   6  10   1  471.05   31.20
   6  10   1  449.46   30.40
  -6  10  -1  561.94   32.70
  -6  10  -1  508.55   32.10
  -8 -10  -1  105.29   10.00
  -8 -10  -1  118.69    9.50
  -8 -10  -1  142.49   11.30
  -8 -10  -1  111.69    8.60
  -8 -10  -1  102.29    9.20
  -8  10  -1  133.69    8.50
   8  10   1  119.09    8.00
  -8  10  -1  122.49    8.90
  -8  10  -1  114.09   10.50
  -8  10  -1  119.89    9.40
   8  10   1  116.59    8.60
  -8  10  -1  124.39    8.20
  -8  10  -1  125.29    9.50
 -10 -10  -1  185.18   11.50
 -10 -10  -1  164.38   12.10
  -9 -11   1   28.80    3.90
  -9 -11   1   24.10    3.50
  -9  11   1   29.20    3.40
   9  11  -1   25.20    4.00
  -7 -11   1   49.30    5.70
  -7 -11   1   54.09    6.70
  -7 -11   1   46.30    5.80
  -7 -11   1   47.30    5.40
  -7  11   1   63.59    6.20
   7  11  -1   49.30    5.00
   7  11  -1   47.50    5.00
  -7  11   1   68.69    5.50
  -7  11   1   62.39    4.60
  -5 -11   1   56.39   12.40
  -5 -11   1   46.00    5.40
  -5 -11   1   53.29    7.80
  -5 -11   1   44.50    6.70
  -5 -11   1   46.70    4.40
  -5 -11   1   46.70    5.70
  -5 -11   1   54.49    5.70
  -5  11   1   55.49    5.40
  -5  11   1   47.40    5.70
   5  11  -1   50.59    4.60
  -5  11   1   57.69    5.70
  -5  11   1   52.79    4.50
  -5  11   1   53.39    4.30
   5  11  -1   50.19    4.90
  -5  11   1   43.50    8.30
  -5  11   1   57.79    5.10
   3 -11  -1    3.10    3.30
  -3 -11   1    4.60    4.40
  -3 -11   1    1.80    2.70
  -3 -11   1   11.90    3.50
  -3 -11   1    3.70    3.00
  -3 -11   1    7.20    3.10
   3 -11  -1    1.70    2.10
  -3 -11   1    6.80    3.70
  -3 -11   1    3.40    3.10
  -3 -11   1    2.70    1.80
   3 -11  -1    5.60    2.30
  -3 -11   1    5.50    2.50
  -3  11   1    7.40    2.60
  -3  11   1    3.70    2.20
   3  11  -1    5.00    2.60
  -3  11   1    5.80    2.80
   3  11  -1    4.60    2.40
  -3  11   1    6.30    2.60
  -3  11   1   10.50    4.40
  -3  11   1    9.00    2.90
   3  11  -1   13.00    5.10
  -3  11   1    5.50    2.00
  -3  11   1    7.80    1.90
   3  11  -1    3.20    1.90
   1 -11  -1  167.18   12.10
   1 -11  -1  149.59   13.20
   1 -11  -1  165.58   12.30
   1 -11  -1  150.08   11.70
  -1 -11   1  167.38   12.00
  -1 -11   1  159.78   10.90
  -1 -11   1  157.98   11.00
  -1 -11   1  173.18   12.60
  -1 -11   1  155.98   14.00
  -1 -11   1  160.68   12.60
   1 -11  -1  158.98   11.70
  -1 -11   1  162.28   12.00
  -1 -11   1  171.18   11.60
   1 -11  -1  162.88   10.90
  -1  11   1  173.28   12.70
   1  11  -1  134.89   12.50
   1  11  -1  169.88   11.80
  -1  11   1  163.48   13.10
  -1  11   1  165.08   11.50
  -1  11   1  171.28   10.80
   1 -11   1  353.26   22.40
   1 -11   1  340.47   22.40
  -1 -11  -1  317.47   24.30
  -1 -11  -1  348.07   22.70
   1 -11   1  322.07   21.50
  -1 -11  -1  323.47   21.60
   1 -11   1  322.77   22.60
  -1 -11  -1  333.97   22.20
   1 -11   1  348.37   22.00
  -1 -11  -1  344.47   23.10
   1 -11   1  345.57   22.80
  -1 -11  -1  341.27   23.10
   1 -11   1  327.97   24.00
  -1 -11  -1  348.77   22.60
  -1 -11  -1  346.77   22.70
   1  11   1  328.17   22.30
  -1  11  -1  326.17   22.10
   1  11   1  341.17   22.40
  -1  11  -1  323.37   23.20
  -1  11  -1  326.57   21.20
  -1  11  -1  359.66   23.20
   1  11   1  324.07   23.70
  -1  11  -1  338.27   22.00
  -3 -11  -1   41.80    7.60
  -3 -11  -1   36.30    4.60
   3 -11   1   32.50    4.20
  -3 -11  -1   37.10    5.70
   3 -11   1   27.70    4.60
  -3 -11  -1   36.10    5.30
  -3 -11  -1   38.20    6.30
  -3 -11  -1   29.80    5.00
   3 -11   1   35.60    6.20
   3 -11   1   33.40    4.20
  -3 -11  -1   34.50    3.60
  -3 -11  -1   35.70    5.10
  -3  11  -1   36.70    4.10
   3  11   1   33.40    5.20
   3  11   1   34.00    3.80
  -3  11  -1   26.50    4.20
  -3  11  -1   40.00    4.70
   3  11   1   37.00    7.20
  -3  11  -1   29.90    3.40
  -3  11  -1   38.80    4.20
  -3  11  -1   38.20    4.60
   3  11   1   34.20    4.00
  -3  11  -1   40.60    6.90
  -3  11  -1   37.30    4.40
  -5 -11  -1   34.10    6.20
  -5 -11  -1   38.00    3.80
  -5 -11  -1   49.40    6.20
  -5 -11  -1   32.10    5.00
  -5 -11  -1   42.80    5.20
  -5 -11  -1   36.60    6.60
  -5 -11  -1   43.60    5.70
  -5  11  -1   52.19    4.90
  -5  11  -1   41.20    4.30
   5  11   1   34.40    8.40
  -5  11  -1   50.49    3.90
  -5  11  -1   51.69    5.30
   5  11   1   34.90    4.50
  -5  11  -1   39.40    4.10
  -5  11  -1   48.60    4.70
   5  11   1   33.30    3.70
  -7 -11  -1   18.70    4.30
  -7  11  -1    9.10    2.20
  -7  11  -1   14.60    2.50
  -7  11  -1   12.10    3.70
   7  11   1   15.80    2.70
  -7  11  -1    6.60    2.80
  -7  11  -1   10.10    2.80
  -7  11  -1    7.50    2.60
  -9 -11  -1   24.80    3.70
  -9 -11  -1   21.60    4.00
   9  11   1   17.00    2.90
  -8 -12   1  218.28   16.70
  -8 -12   1  227.08   15.50
  -8 -12   1  242.78   16.70
  -8 -12   1  241.08   17.20
  -8 -12   1  237.28   16.50
  -8  12   1  240.18   15.20
  -8  12   1  236.28   15.60
  -6 -12   1    4.30    2.70
  -6 -12   1    1.90    3.30
  -6 -12   1    4.80    3.50
  -6  12   1    2.00    1.40
   6  12  -1    2.50    1.80
   6  12  -1   -0.40    1.80
  -6  12   1    3.60    2.20
  -6  12   1    5.00    2.30
  -6  12   1    1.40    2.40
  -6  12   1    2.50    2.90
   4 -12  -1  227.38   15.80
   4 -12  -1  221.78   16.60
  -4 -12   1  216.98   16.20
  -4 -12   1  223.08   15.30
  -4 -12   1  232.58   16.10
   4 -12  -1  242.48   16.00
   4 -12  -1  240.68   16.40
  -4 -12   1  200.68   17.20
  -4 -12   1  249.97   16.80
  -4 -12   1  248.38   17.50
  -4  12   1  276.67   17.20
  -4  12   1  237.88   18.70
   4  12  -1  220.08   15.50
  -4  12   1  248.98   15.30
   4  12  -1  204.48   15.40
   2 -12  -1  143.09   10.50
   2 -12  -1  159.48   11.20
  -2 -12   1  125.89   13.10
   2 -12  -1  135.89   10.60
  -2 -12   1  133.29   11.60
  -2 -12   1  130.89   10.30
  -2 -12   1  127.19   10.80
   2 -12  -1  152.38    9.70
  -2 -12   1  128.99    9.80
  -2 -12   1  127.19   10.80
   2 -12  -1  135.09   12.00
  -2 -12   1  132.19   11.60
  -2  12   1  159.28   10.80
   2  12  -1  126.79   10.00
   2  12  -1  122.49    9.70
  -2  12   1  149.39   10.30
  -2  12   1  160.68   11.50
   2  12  -1  127.09   10.30
  -2  12   1  155.98   10.60
  -2  12   1  162.58   10.10
  -2  12   1  151.48   10.40
   2  12  -1  144.49    9.90
   0 -12   1  132.49    9.40
   0 -12  -1  156.38    9.70
   0 -12  -1  112.29   10.50
   0 -12   1  129.79    9.50
   0 -12  -1  135.89   10.60
   0  12   1  140.09   10.00
   0  12   1  124.09   12.10
   0  12  -1  162.58   10.00
   0  12   1  122.69    9.20
   0  12  -1  124.59    9.10
   0  12  -1  134.19    9.80
   0  12  -1  151.38   10.10
   0  12   1  150.08    9.80
   2 -12   1   32.40    4.80
   2 -12   1   36.70    4.60
  -2 -12  -1   42.20    5.70
   2 -12   1   32.10    4.40
   2 -12   1   37.00    4.00
  -2 -12  -1   37.90    7.30
   2 -12   1   31.20    5.00
   2 -12   1   35.00    3.50
   2 -12   1   24.90    5.50
  -2 -12  -1   41.20    5.40
  -2  12  -1   38.90    4.70
  -2  12  -1   33.30    4.20
  -2  12  -1   40.00    4.30
  -2  12  -1   32.30    4.40
  -2  12  -1   33.20    4.10
   2  12   1   41.30   10.40
   2  12   1   42.40    3.80
   4 -12   1   61.69    6.20
  -4  12  -1   74.09    5.50
  -4  12  -1   75.99    6.00
  -4  12  -1   75.29    6.80
  -4  12  -1   87.19    6.90
  -4  12  -1   74.59    6.00
  -6 -12  -1   -3.10    3.60
  -6 -12  -1   -4.30    3.00
  -6 -12  -1   -2.30    3.10
  -6 -12  -1   -0.10    2.60
  -6  12  -1   -1.60    1.70
  -6  12  -1    2.70    1.60
  -6  12  -1    3.00    2.20
  -6  12  -1   -1.60    2.80
   6  12   1   -0.80    1.80
  -6  12  -1    3.80    2.30
  -6  12  -1    0.90    1.40
  -8 -12  -1  290.17   20.30
  -8 -12  -1  298.97   21.10
  -7 -13   1  247.88   18.30
  -7 -13   1  242.88   17.40
  -7 -13   1  266.97   18.10
  -7 -13   1  286.07   18.80
  -7  13   1  240.18   17.20
  -7  13   1  275.47   16.60
  -7  13   1  268.07   16.60
   7  13  -1  244.38   16.80
   5 -13  -1   65.69    5.40
  -5 -13   1   54.79    6.20
  -5 -13   1   53.09    9.00
  -5 -13   1   47.50    7.10
  -5 -13   1   65.29    7.60
  -5 -13   1   49.50    4.50
  -5  13   1   60.39    4.40
   5  13  -1   48.70    4.80
   5  13  -1   53.89    4.60
  -3 -13   1   95.29    7.90
   3 -13  -1   69.19    8.80
   3 -13  -1   91.89    7.10
   3 -13  -1   92.09    7.60
  -3 -13   1   97.99    6.80
   3 -13  -1   79.59    8.00
   3 -13  -1   87.09    8.20
   3 -13  -1   81.79    7.30
  -3 -13   1   97.09    9.80
  -3 -13   1   91.89   12.00
  -3  13   1   98.09    7.60
   3  13  -1   78.09    6.70
  -3  13   1   81.59    7.70
   3  13  -1  101.79    7.10
  -3  13   1   84.09    7.20
  -3  13   1   85.09    6.70
  -3  13   1   84.39    7.30
   3  13  -1  102.79    7.10
  -1 -13   1  126.29   10.50
  -1 -13   1  134.59   11.20
   1 -13  -1  124.19   10.50
  -1 -13   1  142.69   11.10
  -1 -13   1  122.79   12.70
   1 -13  -1  139.09   10.40
   1 -13  -1  131.09   10.30
  -1 -13   1  130.19    9.40
  -1 -13   1  123.49   10.30
   1 -13  -1  142.09    9.40
   1 -13  -1  150.38   11.00
   1 -13  -1  145.89   10.00
  -1 -13   1  125.09    9.90
   1 -13  -1  124.19   12.00
  -1  13   1  120.09   12.30
   1  13  -1  134.29    9.70
   1  13  -1  132.09   10.10
   1  13  -1  127.89    9.10
  -1  13   1  127.89    9.90
  -1  13   1  147.19   10.20
  -1  13   1  130.99    9.80
   1  13  -1  145.29    9.60
  -1  13   1  149.29    9.60
  -1 -13  -1  127.19   13.60
   1 -13   1  123.09   12.60
   1 -13   1  176.18   10.50
   1 -13   1  156.88   11.40
  -1 -13  -1  136.49   11.40
   1 -13   1  138.59   11.40
  -1 -13  -1  131.59   11.90
  -1 -13  -1  164.88   12.40
  -1 -13  -1  149.39   11.00
  -1 -13  -1  150.48   10.40
  -1 -13  -1  152.58   11.70
   1  13   1  136.79   10.10
  -1  13  -1  162.68   10.80
  -1  13  -1  179.78   10.80
  -1  13  -1  176.08   10.90
   1  13   1  146.89   10.90
   1  13   1  138.99   10.70
  -3 -13  -1  391.86   25.00
   3 -13   1  377.66   23.90
  -3 -13  -1  383.86   24.80
  -3 -13  -1  413.66   26.90
  -3 -13  -1  391.66   24.10
   3 -13   1  368.36   26.10
   3 -13   1  333.87   24.20
   3 -13   1  321.07   24.70
   3 -13   1  375.06   24.60
  -3 -13  -1  351.66   25.30
  -3 -13  -1  394.66   26.10
  -3 -13  -1  385.56   25.40
  -3 -13  -1  363.86   28.40
  -3  13  -1  386.66   24.80
  -3  13  -1  376.86   24.70
   3  13   1  353.66   24.20
  -3  13  -1  386.76   24.30
   3  13   1  385.96   24.10
  -3  13  -1  370.86   24.20
  -3  13  -1  384.26   24.90
   3  13   1  376.06   24.30
  -5 -13  -1   41.60    8.70
  -5 -13  -1   47.20    6.60
   5 -13   1   47.40    5.20
  -5  13  -1   59.19    5.20
  -5  13  -1   58.39    5.80
  -5  13  -1   43.10    4.20
  -5  13  -1   54.39    4.00
   5  13   1   47.30    4.40
  -7  13  -1  163.78   11.10
   7  13   1  174.28   11.30
  -6 -14   1  241.38   16.80
  -6 -14   1  238.88   17.30
   6  14  -1  238.88   16.00
  -6  14   1  285.37   16.40
  -6  14   1  251.57   15.90
  -6  14   1  223.78   16.50
  -4 -14   1    9.80    3.60
   4 -14  -1   16.10    2.40
  -4 -14   1   10.20    3.20
  -4 -14   1    9.30    3.90
  -4 -14   1    9.90    2.30
   4 -14  -1   16.10    2.90
  -4 -14   1    8.60    3.20
  -4  14   1    7.80    1.70
   4  14  -1    9.20    2.20
  -4  14   1   13.00    2.80
  -4  14   1   11.60    3.30
  -4  14   1   10.70    2.80
   4  14  -1   10.60    2.60
  -2 -14   1  323.47   21.20
  -2 -14   1  304.27   20.40
  -2 -14   1  295.37   20.40
   2 -14  -1  288.37   21.40
   2 -14  -1  288.57   20.10
  -2 -14   1  307.97   19.40
   2 -14  -1  326.47   19.40
  -2 -14   1  341.57   20.10
   2 -14  -1  285.67   19.90
   2  14  -1  275.07   19.10
   2  14  -1  298.47   19.70
  -2  14   1  275.87   19.80
  -2  14   1  302.57   20.00
  -2  14   1  266.37   19.60
   2  14  -1  294.37   19.60
   0 -14   1  406.16   25.40
   0 -14  -1  428.96   26.40
   0 -14  -1  398.46   26.10
   0 -14   1  372.86   25.80
   0 -14   1  409.16   26.50
   0 -14   1  376.36   26.70
   0 -14   1  376.16   26.30
   0 -14  -1  398.26   26.50
   0 -14  -1  402.96   25.40
   0 -14  -1  390.46   27.00
   0  14   1  388.86   25.80
   0  14   1  413.86   26.00
   0  14   1  398.66   25.80
   0  14  -1  392.16   26.00
   0  14  -1  398.76   25.90
   0  14  -1  395.26   25.70
  -2 -14  -1  499.95   32.30
  -2 -14  -1  506.65   32.10
  -2 -14  -1  501.95   33.20
  -2 -14  -1  515.65   31.40
   2 -14   1  425.96   31.90
   2 -14   1  503.25   31.30
   2 -14   1  454.05   31.80
  -2 -14  -1  498.15   32.70
   2 -14   1  497.25   32.10
  -2  14  -1  511.75   31.70
  -2  14  -1  517.15   31.60
  -2  14  -1  518.75   32.00
   2  14   1  486.15   31.70
   2  14   1  481.65   31.20
   2  14   1  485.05   31.60
  -2  14  -1  502.85   32.10
  -4 -14  -1    3.50    3.70
  -4 -14  -1    3.90    2.60
   4 -14   1    5.30    2.40
  -4 -14  -1   -0.60    2.80
  -4 -14  -1    4.20    2.90
  -4 -14  -1    0.20    1.70
   4  14   1    1.30    1.70
  -4  14  -1    3.10    1.70
  -4  14  -1    3.70    2.40
  -4  14  -1   -0.90    1.80
   4  14   1    3.80    2.70
  -6 -14  -1  622.44   40.80
  -6 -14  -1  699.83   43.50
  -6  14  -1  642.14   39.60
  -6  14  -1  563.74   39.70
   6  14   1  611.84   39.30
   5  15  -1   24.10    2.70
  -5  15   1   24.30    3.50
   5  15  -1   21.90    2.70
  -3 -15   1   59.79    5.90
   3 -15  -1   68.59    5.50
  -3 -15   1   55.29    7.90
  -3 -15   1   61.09    5.70
  -3 -15   1   56.19    4.90
   3 -15  -1   63.39    5.40
  -3 -15   1   55.79    6.30
   3  15  -1   60.69    4.80
  -3  15   1   61.59    7.40
  -3  15   1   67.79    5.90
   3  15  -1   55.19    5.40
   3  15  -1   46.70    6.50
   3  15  -1   64.89    4.80
  -3  15   1   68.39    5.50
  -1 -15   1  286.17   18.20
   1 -15  -1  290.47   18.20
   1 -15  -1  275.07   20.20
  -1 -15   1  269.67   18.70
  -1 -15   1  245.58   19.40
  -1 -15   1  292.57   19.30
   1 -15  -1  268.97   18.60
   1 -15  -1  283.87   19.20
  -1  15   1  301.17   18.80
  -1  15   1  292.97   18.70
   1  15  -1  280.57   18.60
   1  15  -1  281.27   18.50
   1  15  -1  285.27   18.60
  -1  15   1  273.67   18.50
  -1 -15  -1  282.97   19.00
  -1 -15  -1  281.67   18.30
  -1 -15  -1  267.17   19.80
   1 -15   1  279.47   18.30
  -1 -15  -1  277.17   20.30
   1 -15   1  306.77   19.40
   1 -15   1  268.27   18.80
  -1 -15  -1  282.57   19.50
  -1  15  -1  301.07   18.60
   1  15   1  284.57   18.70
  -1  15  -1  288.87   18.90
  -1  15  -1  284.87   18.90
   1  15   1  274.17   18.70
   1  15   1  278.67   18.70
  -3 -15  -1   19.80    3.50
  -3 -15  -1   25.30    5.00
  -3 -15  -1   12.90    3.20
  -3 -15  -1   16.60    2.60
  -3 -15  -1   21.30    4.20
   3 -15   1   18.00    3.30
   3 -15   1   19.00    2.90
   3  15   1   14.80    2.80
  -3  15  -1   13.80    3.30
  -3  15  -1    9.20    2.70
   3  15   1    7.80    2.70
  -3  15  -1    8.40    2.20
   3  15   1   12.60    2.20
   5  15   1  204.78   12.90
  -5  15  -1  189.38   13.00
  -5  15  -1  219.28   13.40
  -5  15  -1  184.58   13.50
  -4  16   1   94.39    7.00
   4  16  -1   81.89    6.30
  -4  16   1  101.99    6.30
  -2 -16   1   56.69    5.20
  -2 -16   1   53.19    4.60
  -2  16   1   50.99    4.50
  -2  16   1   57.99    4.90
   2  16  -1   43.80    4.50
   2  16  -1   49.20    4.80
   0 -16   1  531.65   33.60
   0 -16   1  494.45   34.10
   0  16   1  620.74   34.00
   0  16   1  554.74   33.80
   0  16  -1  507.05   33.80
   0  16  -1  510.45   33.70
   0  16  -1  508.25   33.90
   2 -16   1   35.90    3.80
   2 -16   1   32.10    3.10
  -2  16  -1   27.30    3.90
  -2  16  -1   34.40    3.20
  -2  16  -1   32.80    3.70
   2  16   1   38.30    3.70
   2  16   1   43.20    3.60
  -4  16  -1  248.18   15.40
  -4  16  -1  219.78   15.50
   4  16   1  236.48   15.20
 -12   0   2 1470.25   80.89
 -12   0   2 1190.28   80.89
  12   0  -2 1341.47   82.49
 -12   0   2 1260.27   80.79
 -12   0   2 1135.89   80.49
  12   0  -2 1346.07   80.49
  12   0  -2 1308.37   80.49
  10   0  -2   57.29    4.60
 -10   0   2   61.69    5.50
  10   0  -2   57.89    4.80
  10   0  -2   51.99    4.70
  10   0  -2   51.49    5.80
 -10   0   2   46.00    6.20
 -10   0   2   50.39    5.40
 -10   0   2   47.50    5.20
 -10   0   2   56.59    5.60
 -10   0   2   55.09    5.30
 -10   0   2   46.10    6.30
 -10   0   2   53.29    5.80
 -10   0   2   63.29    6.60
  -8   0   2 2165.28  122.79
  -8   0   2 2055.09  121.89
   8   0  -2 1887.41  121.59
  -8   0   2 1997.80  122.09
  -8   0   2 1808.72  121.59
  -8   0   2 2029.70  122.29
   8   0  -2 1826.42  120.99
   8   0  -2 1804.42  121.09
   8   0  -2 1896.01  123.49
  -8   0   2 2118.19  122.29
  -8   0   2 1714.33  120.99
  -8   0   2 2072.39  123.39
   8   0  -2 2039.50  122.49
  -8   0   2 1862.01  121.79
   6   0  -2    1.80    2.80
   6   0  -2    2.70    1.60
  -6   0   2    1.80    2.20
  -6   0   2    3.90    2.90
   6   0  -2    4.50    2.10
  -6   0   2    2.30    2.40
  -4   0   2 5582.34  355.26
  -4   0   2 5814.02  356.06
   2   0  -2  210.28   13.30
  -2   0   2  222.08   13.40
  -2   0   2  196.58   12.90
   2   0  -2  203.78   13.00
  -2   0   2  179.88   13.20
   2   0   2  242.98   14.40
   2   0   2  191.98   14.50
   2   0   2  229.18   14.10
  -4   0  -2 5426.26  344.17
  -4   0  -2 5780.52  344.77
  -4   0  -2 4835.92  343.97
   4   0   2 6180.98  343.97
  -6   0  -2  569.14   33.80
   6   0   2  560.84   33.70
   6   0   2  513.45   33.10
  -6   0  -2  522.35   33.90
   6   0   2  546.45   34.40
   6   0   2  469.35   32.80
  -6   0  -2  495.95   33.60
  -8   0  -2 2468.45  150.58
   8   0   2 2273.07  149.99
   8   0   2 2418.56  150.58
  -8   0  -2 2407.76  151.18
   8   0   2 2286.77  152.18
  -8   0  -2 2465.55  151.28
  -8   0  -2 2589.04  152.28
  -8   0  -2 2418.36  151.98
   8   0   2 2646.54  151.38
  -8   0  -2 2307.37  151.18
  -8   0  -2 2438.66  150.68
  -8   0  -2 2484.85  150.78
  -8   0  -2 2220.08  151.08
 -10   0  -2    1.10    2.50
 -10   0  -2    1.70    2.00
  10   0   2    0.40    2.30
 -10   0  -2    2.40    2.40
 -10   0  -2    0.40    3.50
  10   0   2    4.80    1.90
  10   0   2    5.50    3.90
 -10   0  -2   -0.80    3.60
 -10   0  -2    2.00    2.50
  10   0   2    4.20    2.10
 -10   0  -2   -0.90    2.40
 -10   0  -2    1.20    3.80
  10   0   2    6.00    2.00
  10   0   2    1.00    4.80
 -12   0  -2  192.78   11.90
 -12   0  -2  166.38   12.10
 -12   0  -2  171.48   12.00
  12   0   2  178.38   12.20
  12   0   2  183.18   11.70
  12   0   2  170.38   11.50
 -12   0  -2  178.48   11.80
 -11  -1   2   37.50    4.30
 -11  -1   2   35.80    5.70
 -11  -1   2   44.90    4.50
 -11  -1   2   46.80    4.20
  11  -1  -2   35.20    3.90
 -11  -1   2   42.50    4.60
 -11  -1   2   33.00    5.10
 -11  -1   2   35.50    4.30
 -11  -1   2   40.10    4.80
  11  -1  -2   39.30    3.70
  11  -1  -2   41.20    5.00
  11   1  -2   40.50    6.00
 -11   1   2   44.70    4.60
  11   1  -2   37.80    3.60
  11   1  -2   33.80    3.90
 -11   1   2   45.80    4.40
 -11   1   2   34.60    3.90
  11   1  -2   39.20    4.10
 -11   1   2   44.50    4.60
  11   1  -2   36.70    4.70
 -11   1   2   27.30    5.10
 -11   1   2   46.20    4.80
  -9  -1   2  151.98   11.90
  -9  -1   2  153.98   11.90
   9  -1  -2  116.79    9.40
  -9  -1   2  150.78   10.50
  -9  -1   2  138.99   10.40
   9  -1  -2  127.69    9.50
   9  -1  -2  143.19   11.30
   9  -1  -2  129.39   10.20
  -9  -1   2  156.08   10.90
  -9  -1   2  138.19   10.20
  -9  -1   2  145.99   11.10
  -9  -1   2  153.28   10.80
   9   1  -2  127.09   10.40
   9   1  -2  146.59    9.70
  -9   1   2  139.49   10.40
  -9   1   2  135.09   10.20
   9   1  -2  137.39    9.60
  -9   1   2  144.39   10.60
  -9   1   2  117.99    9.40
  -9   1   2  132.49   10.10
  -9   1   2  137.29   11.20
   9   1  -2  118.09    9.50
   9   1  -2  136.19   13.30
   9   1  -2  156.18   11.90
  -9   1   2  139.89   10.50
  -9   1   2  151.88   12.00
  -9   1   2  151.28   10.90
  -9   1   2  142.49   11.10
  -7  -1   2 1723.93  113.49
   7  -1  -2 1834.42  112.79
  -7  -1   2 1907.81  113.89
  -7  -1   2 1826.62  112.79
   7  -1  -2 1507.25  111.69
   7  -1  -2 1704.13  112.09
   7  -1  -2 1788.52  113.59
   7   1  -2 1710.23  112.19
   7   1  -2 1809.32  112.99
  -7   1   2 1860.41  113.39
  -7   1   2 1901.11  113.19
  -7   1   2 1967.00  114.09
  -7   1   2 2021.30  113.39
  -7   1   2 2054.69  112.09
  -7   1   2 1505.25  111.89
  -7   1   2 1927.91  112.59
   7   1  -2 1756.12  113.89
  -7   1   2 1605.74  112.29
  -5  -1   2  782.02   49.70
  -5  -1   2  795.62   49.99
   5  -1  -2  774.32   49.99
   5  -1  -2  798.72   49.50
   5  -1  -2  713.13   49.10
  -5  -1   2  832.22   49.50
  -5  -1   2  688.73   49.50
  -5  -1   2  798.12   49.80
  -5   1   2  893.41   49.80
   5   1  -2  748.93   49.30
  -5   1   2  874.31   50.09
  -5   1   2  889.41   50.79
   5   1  -2  737.13   50.29
  -5   1   2  728.43   49.60
   5   1  -2  759.32   49.70
  -3  -1   2  214.38   14.70
   3  -1  -2  243.38   14.70
  -3  -1   2  246.28   14.60
  -3  -1   2  200.98   15.00
  -3  -1   2  194.38   14.60
  -3  -1   2  216.38   14.80
  -3  -1   2  227.18   14.70
   3  -1  -2  234.28   14.50
   3   1  -2  226.88   15.10
  -3   1   2  253.87   15.30
   3   1  -2  203.18   14.30
  -3   1   2  249.78   14.70
   3   1  -2  236.78   14.70
  -3   1   2  222.78   14.60
  -1  -1   2 1968.90  120.49
   1  -1  -2 2067.99  120.49
   1  -1  -2 1838.22  120.49
   1  -1  -2 1974.50  120.29
  -1  -1   2 1821.42  120.59
   1   1  -2 1933.51  120.59
   1   1  -2 1811.32  120.39
  -1   1   2 1873.31  120.49
  -1   1   2 2198.88  120.69
   1  -1   2 1291.17   91.69
  -1  -1  -2 1423.66   91.79
  -1  -1  -2 1417.06   91.99
   1   1   2 1687.33   91.89
   1   1   2 1587.14   92.09
  -3  -1  -2  290.17   18.80
   3  -1   2  303.47   18.50
  -3  -1  -2  290.57   18.50
  -3  -1  -2  288.87   18.80
   3  -1   2  266.07   18.60
   3  -1   2  315.57   18.70
  -3   1  -2  268.67   18.60
   3   1   2  301.17   19.10
   3   1   2  289.47   18.50
   3   1   2  309.37   18.70
   5  -1   2 1509.35   88.49
  -5  -1  -2 1397.46   88.59
  -5  -1  -2 1435.16   88.69
  -5  -1  -2 1293.57   88.29
  -5  -1  -2 1476.25   88.99
   5  -1   2 1269.17   87.99
   5   1   2 1446.66   89.19
  -5   1  -2 1444.96   88.69
  -5   1  -2 1432.56   88.89
   5   1   2 1532.15   88.69
  -5   1  -2 1395.56   88.49
   5   1   2 1381.16   88.19
  -7  -1  -2   39.50    5.80
   7  -1   2   35.40    3.90
   7  -1   2   39.60    3.40
   7  -1   2   37.10    4.60
  -7  -1  -2   45.90    5.40
  -7  -1  -2   43.60    4.20
  -7  -1  -2   39.70    4.80
   7  -1   2   34.00    5.90
  -7  -1  -2   37.60    4.30
  -7  -1  -2   38.20    6.00
  -7  -1  -2   37.80    5.00
  -7  -1  -2   33.50    3.90
  -7   1  -2   41.20    5.10
   7   1   2   39.30    4.80
  -7   1  -2   39.90    4.70
  -7   1  -2   36.20    4.10
  -7   1  -2   35.20    4.50
  -7   1  -2   46.70    4.50
  -7   1  -2   45.80    5.10
   7   1   2   35.30    4.20
  -7   1  -2   38.30    5.70
  -7   1  -2   42.70    5.30
   7   1   2   32.70    6.10
  -7   1  -2   40.10    4.30
   9  -1   2  430.16   27.60
   9  -1   2  422.86   27.00
   9  -1   2  446.36   29.90
  -9  -1  -2  365.76   28.10
  -9  -1  -2  407.16   27.40
  -9  -1  -2  439.86   27.80
  -9  -1  -2  397.66   29.00
  -9  -1  -2  432.26   28.50
  -9  -1  -2  395.96   28.30
  -9  -1  -2  428.76   27.90
   9   1   2  428.46   27.00
  -9   1  -2  458.55   27.50
   9   1   2  414.86   27.80
  -9   1  -2  358.46   27.70
  -9   1  -2  433.86   27.70
   9   1   2  444.26   30.20
  -9   1  -2  435.96   27.50
   9   1   2  423.16   27.10
   9   1   2  422.86   27.10
  -9   1  -2  467.95   29.20
  -9   1  -2  451.95   28.10
   9   1   2  431.66   28.60
  -9   1  -2  436.96   27.70
  -9   1  -2  418.26   28.30
  -9   1  -2  430.36   29.10
 -11  -1  -2  113.19    8.50
  11  -1   2  116.09    8.20
 -11  -1  -2  126.19    8.50
  11  -1   2  122.59    7.90
  11  -1   2  126.89    9.10
  11  -1   2  143.39   10.90
 -11  -1  -2  107.69    8.70
 -11  -1  -2  121.29    8.70
  11  -1   2  126.29   10.10
 -11  -1  -2  104.99    9.50
 -11  -1  -2  109.79    9.50
 -11   1  -2  121.89    8.60
 -11   1  -2  114.89    8.50
  11   1   2  115.79    8.30
 -11   1  -2  112.59    8.50
 -11   1  -2  100.89    9.30
  11   1   2  112.19    7.90
 -11   1  -2  100.39    9.10
 -11   1  -2  123.59    8.90
  11   1   2  117.39    8.20
  11   1   2  111.39   10.80
  12  -2  -2    7.90    1.80
 -12  -2   2   11.20    2.70
  12  -2  -2   10.20    2.50
 -12  -2   2   10.30    2.30
 -12  -2   2    7.60    2.20
  12  -2  -2   13.20    1.70
  12  -2  -2   11.00    2.30
 -12  -2   2    7.00    2.40
  12   2  -2    8.70    1.80
 -12   2   2    9.70    2.20
 -12   2   2    8.60    2.40
 -12   2   2    8.10    2.10
  12   2  -2    9.70    1.70
 -12   2   2   12.20    2.40
  10  -2  -2   76.59   10.60
  10  -2  -2   79.79    8.40
 -10  -2   2   97.59    7.40
 -10  -2   2   98.59    7.50
 -10  -2   2   82.29    7.70
 -10  -2   2   92.99    7.10
  10  -2  -2   72.59    6.60
  10  -2  -2   79.99    7.40
 -10  -2   2  101.49    8.20
 -10  -2   2  106.39    9.10
  10  -2  -2   75.89    6.40
  10  -2  -2   80.79    6.50
 -10   2   2   87.79    7.20
 -10   2   2   82.09    6.50
  10   2  -2   82.89    7.70
  10   2  -2   80.69   12.10
  10   2  -2   79.99    9.50
 -10   2   2  104.39    7.50
  10   2  -2   75.79    6.70
  10   2  -2   94.09    6.60
 -10   2   2  101.19    7.70
 -10   2   2   70.79    7.90
  10   2  -2   81.99    6.80
 -10   2   2   87.19    7.90
 -10   2   2   97.29    7.60
 -10   2   2   97.29    7.50
 -10   2   2   83.99    8.40
 -10   2   2  107.29    7.20
   8  -2  -2   29.30    5.90
   8  -2  -2   23.20    3.50
  -8  -2   2   22.90    4.90
  -8  -2   2   36.30    7.00
  -8  -2   2   19.60    3.60
  -8  -2   2   24.70    5.80
  -8  -2   2   30.10    5.50
   8  -2  -2   22.80    2.80
   8  -2  -2   32.50    4.70
  -8  -2   2   19.60    4.60
  -8  -2   2   21.20    3.90
  -8  -2   2   34.70    5.80
  -8   2   2   20.00    3.80
  -8   2   2   25.40    5.80
  -8   2   2   25.40    4.00
   8   2  -2   21.50    5.70
   8   2  -2   25.40    3.90
  -8   2   2   24.70    3.50
  -8   2   2   26.20    5.20
  -8   2   2   26.30    4.30
   8   2  -2   27.60    3.20
  -8   2   2   25.00    5.70
   8   2  -2   25.80    4.70
   8   2  -2   20.30    2.80
  -8   2   2   29.50    5.10
   8   2  -2   20.60    2.80
  -8   2   2   28.30    5.00
  -8   2   2   29.00    4.90
  -8   2   2   20.90    3.00
  -6  -2   2  924.41   55.39
   6  -2  -2  778.62   54.49
   6  -2  -2  866.61   55.69
   6  -2  -2  876.41   55.09
  -6  -2   2  946.51   55.59
  -6  -2   2  825.92   55.29
  -6  -2   2  931.11   55.89
  -6  -2   2  910.71   55.19
   6   2  -2  862.11   55.59
   6   2  -2  762.32   54.49
  -6   2   2  827.32   55.09
   6   2  -2  819.42   54.89
  -6   2   2  943.81   55.69
  -6   2   2  947.81   55.39
   6   2  -2  856.91   56.49
  -6   2   2  926.21   56.69
  -4  -2   2  535.05   33.30
  -4  -2   2  498.75   33.50
  -4  -2   2  475.05   33.70
  -4  -2   2  495.05   33.30
  -4  -2   2  452.95   33.10
   4  -2  -2  568.04   33.00
   4  -2  -2  589.04   33.20
  -4  -2   2  543.75   33.10
  -4   2   2  558.44   34.00
   4   2  -2  523.95   34.00
  -4   2   2  576.34   33.30
  -4   2   2  557.04   34.10
   4   2  -2  520.35   33.40
  -4   2   2  471.05   33.10
   4   2  -2  494.05   32.90
  -2  -2   2 1804.22  123.59
  -2  -2   2 1923.31  123.29
   2  -2  -2 1982.00  123.29
   2  -2  -2 1971.30  123.19
  -2  -2   2 1829.92  123.59
  -2  -2   2 1841.62  123.89
  -2  -2   2 1831.22  123.39
  -2   2   2 2192.68  123.49
  -2   2   2 2261.77  123.89
   2   2  -2 2031.50  123.89
   2   2  -2 1930.61  123.49
  -2   2   2 2132.09  123.59
  -2   2   2 2126.99  123.49
   0  -2   2   20.70    2.50
   0  -2  -2   14.80    2.70
   0  -2  -2   17.90    2.00
   0   2  -2   16.40    1.70
   0   2   2   20.50    2.30
   0   2   2   23.30    2.40
   0   2  -2   16.30    1.40
  -2  -2  -2 8126.69  491.45
   2   2   2 7681.63  491.35
  -4  -2  -2   52.19    5.30
  -4  -2  -2   53.69    4.80
  -4  -2  -2   54.69    5.20
  -4  -2  -2   54.49    4.70
  -4  -2  -2   57.19    4.40
   4  -2   2   42.10    4.00
   4  -2   2   58.39    4.10
  -4   2  -2   51.29    4.50
   4   2   2   42.70    5.70
  -4   2  -2   52.79    4.30
   4   2   2   60.19    5.00
   4   2   2   50.39    4.60
  -6  -2  -2  327.37   20.70
   6  -2   2  313.77   20.20
   6  -2   2  327.67   20.10
  -6  -2  -2  326.57   20.70
  -6  -2  -2  339.57   20.30
  -6  -2  -2  316.77   21.10
  -6   2  -2  298.37   20.40
   6   2   2  295.57   20.10
  -6   2  -2  285.17   20.20
   6   2   2  310.77   21.40
  -6   2  -2  295.77   20.70
   6   2   2  278.97   19.60
   6   2   2  312.97   20.60
  -8  -2  -2   85.69    8.80
  -8  -2  -2   76.59    8.50
  -8  -2  -2   86.39    8.70
  -8  -2  -2   86.59    7.40
  -8  -2  -2   92.39    8.30
   8  -2   2   97.49    7.10
   8  -2   2   82.69    6.50
   8  -2   2  104.89    9.40
   8  -2   2   98.29    7.80
  -8  -2  -2   92.29    8.20
   8   2   2   88.49    7.50
  -8   2  -2  103.59    8.50
   8   2   2   87.59    8.40
  -8   2  -2  103.69    8.80
   8   2   2   98.19    6.60
   8   2   2  100.59   10.10
  -8   2  -2   92.39    7.80
  -8   2  -2   94.89    7.90
  -8   2  -2  107.19    8.10
  -8   2  -2   91.39    7.30
   8   2   2   97.89    6.80
  -8   2  -2   82.09   10.80
   8   2   2   87.99    6.80
  -8   2  -2   89.29    7.20
  -8   2  -2   93.89    6.90
 -10  -2  -2  203.18   15.00
 -10  -2  -2  215.38   14.10
  10  -2   2  202.18   13.30
  10  -2   2  200.98   13.40
 -10  -2  -2  195.48   15.30
  10  -2   2  170.48   14.50
 -10  -2  -2  192.18   13.80
 -10  -2  -2  216.28   13.80
 -10  -2  -2  207.78   13.80
  10  -2   2  190.08   16.20
  10  -2   2  220.68   14.10
  10   2   2  210.28   13.50
  10   2   2  192.38   17.60
  10   2   2  212.98   14.80
  10   2   2  206.98   13.40
 -10   2  -2  211.18   13.80
 -10   2  -2  190.18   15.00
  10   2   2  203.98   13.30
 -10   2  -2  189.88   13.80
 -10   2  -2  202.28   13.90
 -10   2  -2  175.78   14.40
 -10   2  -2  202.08   14.20
 -12  -2  -2   17.00    2.70
 -12  -2  -2   16.30    2.40
  12  -2   2   12.30    1.90
 -12  -2  -2   13.80    3.00
  12  -2   2   14.00    2.10
 -12  -2  -2   15.30    2.70
 -12   2  -2   12.00    2.70
  12   2   2   12.00    3.00
 -12   2  -2   14.90    2.50
 -12   2  -2   14.30    2.60
  12   2   2   13.50    2.20
  12   2   2   11.70    2.00
  12   2   2   13.40    2.00
 -11  -3   2    1.80    2.90
 -11  -3   2    2.70    2.40
 -11  -3   2   -0.50    2.60
 -11  -3   2    5.40    2.40
 -11  -3   2    2.30    2.90
  11  -3  -2    0.10    2.40
 -11  -3   2    1.50    2.60
  11  -3  -2    3.70    1.60
 -11  -3   2    9.90    4.00
  11  -3  -2    3.60    1.80
 -11  -3   2    3.50    3.50
  11   3  -2    0.50    1.70
  11   3  -2    1.90    2.00
  11   3  -2   -2.20    3.40
 -11   3   2    4.70    2.40
 -11   3   2    2.80    2.40
 -11   3   2    2.70    2.60
 -11   3   2    3.90    2.20
  11   3  -2   -0.10    1.90
 -11   3   2   -0.60    2.40
 -11   3   2    3.40    2.90
  11   3  -2    3.40    3.00
 -11   3   2   -0.80    3.00
  -9  -3   2   79.79    7.20
  -9  -3   2   79.59    7.80
   9  -3  -2   76.89    7.40
  -9  -3   2   81.29    8.00
  -9  -3   2   79.69    6.70
  -9  -3   2   75.29    6.80
   9  -3  -2   73.19    6.30
   9  -3  -2   70.59    5.60
  -9  -3   2   76.69    6.20
  -9  -3   2   88.69    7.50
   9   3  -2   71.09    6.90
  -9   3   2   77.59    6.80
   9   3  -2   69.89    6.00
  -9   3   2   80.59    8.10
   9   3  -2   78.79    8.20
   9   3  -2   66.89    5.90
  -9   3   2   71.89    6.20
  -9   3   2   73.19    6.50
  -9   3   2   65.09    6.80
   9   3  -2   74.29    5.90
  -9   3   2   69.99    5.80
  -9   3   2   74.69    6.50
  -9   3   2   79.69    6.80
  -9   3   2   68.99    7.20
   9   3  -2   67.69    9.50
  -9   3   2   84.99    6.80
  -7  -3   2   51.29    5.60
  -7  -3   2   46.30    5.10
  -7  -3   2   49.70    6.20
   7  -3  -2   61.09    5.50
  -7  -3   2   66.29    6.90
  -7  -3   2   63.79    6.20
   7  -3  -2   46.80    4.50
   7  -3  -2   59.69    6.20
  -7  -3   2   60.89    6.40
  -7  -3   2   56.89    5.90
   7   3  -2   53.19    4.40
  -7   3   2   58.49    6.50
  -7   3   2   48.80    6.90
  -7   3   2   49.70    4.60
  -7   3   2   54.89    6.60
   7   3  -2   59.29    4.60
  -7   3   2   58.19    5.50
   7   3  -2   48.90    4.30
  -7   3   2   62.19    5.60
  -7   3   2   67.79    5.00
   7   3  -2   58.69    6.10
  -7   3   2   62.39    5.50
   7   3  -2   50.69    5.30
   7   3  -2   54.19    7.40
  -7   3   2   57.39    6.70
  -7   3   2   53.09    5.20
  -5  -3   2  511.55   31.20
  -5  -3   2  443.76   31.00
   5  -3  -2  517.75   30.70
  -5  -3   2  490.55   31.50
   5  -3  -2  414.06   31.40
  -5  -3   2  436.36   31.90
  -5  -3   2  503.15   30.90
   5  -3  -2  506.95   31.00
  -5  -3   2  468.25   31.20
  -5   3   2  497.55   31.00
  -5   3   2  542.55   31.10
   5   3  -2  483.45   32.30
  -5   3   2  504.45   31.20
   5   3  -2  485.85   31.40
  -5   3   2  519.65   32.30
   5   3  -2  456.05   30.40
   5   3  -2  468.65   30.80
  -3  -3   2  978.10   65.09
  -3  -3   2  997.80   64.79
  -3  -3   2 1056.39   64.99
   3  -3  -2 1063.69   64.49
  -3  -3   2  935.61   64.89
  -3  -3   2  993.90   65.69
  -3  -3   2 1096.29   64.79
  -3  -3   2  966.70   64.99
  -3  -3   2 1041.10   65.19
   3   3  -2 1047.20   65.09
  -3   3   2 1032.20   64.79
  -3   3   2 1050.89   64.99
  -3   3   2 1158.88   65.69
   3   3  -2 1068.59   64.79
   3   3  -2 1077.39   65.59
  -3   3   2 1061.29   64.89
  -1  -3   2 1123.59   70.79
   1  -3  -2 1183.38   70.49
   1  -3  -2 1133.19   70.19
   1  -3  -2 1052.69   70.39
  -1   3   2 1101.79   70.39
  -1   3   2 1180.68   70.29
  -1   3   2 1129.99   70.39
   1   3  -2 1139.59   70.39
   1  -3   2 1740.93  110.59
  -1  -3  -2 1838.42  110.99
  -1  -3  -2 1821.92  111.39
  -1  -3  -2 1682.23  110.89
   1   3   2 1869.01  111.09
  -1   3  -2 1759.92  110.89
  -3  -3  -2 2022.00  121.99
  -3  -3  -2 2010.60  122.19
  -3  -3  -2 1914.41  122.19
  -3  -3  -2 1994.10  122.59
  -3  -3  -2 1890.51  122.09
  -3  -3  -2 1978.30  121.79
  -3   3  -2 2078.39  122.49
   3   3   2 1918.91  121.99
   3   3   2 1867.01  122.49
   3   3   2 2002.40  122.09
   3   3   2 1910.91  121.79
   5  -3   2 1201.18   73.09
  -5  -3  -2 1224.48   73.69
  -5  -3  -2 1165.08   73.39
  -5  -3  -2 1209.18   74.09
  -5  -3  -2 1196.08   73.29
  -5  -3  -2 1193.98   73.89
  -5   3  -2 1057.99   73.19
  -5   3  -2 1064.89   73.09
   5   3   2 1178.08   72.89
   5   3   2 1153.78   74.39
   5   3   2 1162.18   73.29
   5   3   2 1270.67   73.79
  -7  -3  -2  253.57   19.80
  -7  -3  -2  234.18   16.80
   7  -3   2  283.77   17.20
  -7  -3  -2  260.37   18.60
  -7  -3  -2  229.28   17.00
  -7  -3  -2  251.17   17.70
  -7  -3  -2  275.77   17.20
   7  -3   2  245.08   16.50
  -7  -3  -2  250.27   17.20
  -7   3  -2  250.57   16.90
   7   3   2  286.37   18.00
  -7   3  -2  271.97   16.80
  -7   3  -2  273.47   17.10
   7   3   2  271.87   16.60
  -7   3  -2  225.58   17.00
  -7   3  -2  242.98   17.00
   7   3   2  242.78   18.90
  -7   3  -2  263.37   16.70
   7   3   2  252.97   17.60
   7   3   2  246.78   17.00
  -7   3  -2  283.57   18.40
  -7   3  -2  246.88   17.20
   7   3   2  253.47   16.50
  -7   3  -2  247.78   17.00
   7   3   2  250.67   16.50
  -7   3  -2  261.07   16.70
  -9  -3  -2  163.78   13.40
  -9  -3  -2  161.78   14.10
  -9  -3  -2  198.08   13.30
  -9  -3  -2  198.68   14.60
   9  -3   2  208.88   15.40
   9  -3   2  200.58   13.40
   9  -3   2  189.28   12.70
  -9  -3  -2  194.78   13.50
  -9  -3  -2  189.78   15.30
  -9  -3  -2  168.38   14.60
  -9   3  -2  221.38   15.10
  -9   3  -2  173.68   13.80
  -9   3  -2  192.08   13.10
  -9   3  -2  207.88   13.10
   9   3   2  228.18   14.60
   9   3   2  195.48   13.00
  -9   3  -2  183.88   13.30
  -9   3  -2  207.58   14.00
  -9   3  -2  205.78   13.60
   9   3   2  163.48   16.30
   9   3   2  198.78   14.00
   9   3   2  202.58   12.90
  -9   3  -2  213.78   13.60
  -9   3  -2  210.48   15.00
   9   3   2  192.38   13.00
  -9   3  -2  177.58   13.00
 -11  -3  -2   84.69    7.60
  11  -3   2   89.89    6.10
  11  -3   2   86.99    7.30
 -11  -3  -2   80.69    7.00
 -11  -3  -2   77.39    6.50
  11  -3   2   86.39    6.10
 -11  -3  -2   73.09    8.20
 -11  -3  -2   85.19    6.50
 -11  -3  -2   86.19    7.80
 -11  -3  -2   75.89    6.40
 -11   3  -2   87.79   10.20
  11   3   2   86.59    7.40
  11   3   2   84.19    6.30
  11   3   2   85.79    6.40
 -11   3  -2   84.79    7.40
  11   3   2   91.59    6.20
 -11   3  -2   82.29    6.90
 -11   3  -2   90.79    6.70
  11   3   2   81.49    7.70
 -11   3  -2   80.89    6.60
  12  -4  -2   23.10    2.80
 -12  -4   2   36.90    3.40
  12  -4  -2   25.50    2.70
 -12  -4   2   36.90    3.20
  12   4  -2   31.70    3.00
 -12   4   2   33.60    3.50
  12   4  -2   32.70    3.00
  12   4  -2   28.10    2.80
  10  -4  -2  173.18   11.30
  10  -4  -2  162.38   11.90
 -10  -4   2  160.48   11.80
 -10  -4   2  153.08   11.70
 -10  -4   2  141.59   12.90
 -10  -4   2  162.28   11.30
 -10  -4   2  152.68   12.60
 -10  -4   2  162.18   12.30
 -10  -4   2  164.88   12.20
  10   4  -2  165.48   11.20
 -10   4   2  165.28   11.70
  10   4  -2  150.98   12.30
 -10   4   2  172.48   12.20
 -10   4   2  181.88   12.00
 -10   4   2  169.88   12.00
 -10   4   2  153.88   13.00
 -10   4   2  164.98   11.90
  10   4  -2  185.28   11.20
  10   4  -2  175.78   12.20
 -10   4   2  182.28   11.30
 -10   4   2  160.18   11.40
  10   4  -2  172.88   11.30
   8  -4  -2  808.62   52.59
   8  -4  -2  755.62   50.79
  -8  -4   2  819.12   51.59
  -8  -4   2  789.62   51.29
  -8  -4   2  809.62   51.79
  -8  -4   2  793.62   51.89
  -8  -4   2  821.22   52.19
   8  -4  -2  838.62   51.49
  -8   4   2  824.22   53.09
  -8   4   2  817.32   51.39
  -8   4   2  703.93   50.69
   8   4  -2  753.12   53.59
  -8   4   2  769.32   51.49
   8   4  -2  807.92   50.69
  -8   4   2  785.92   51.69
   8   4  -2  815.82   50.69
  -8   4   2  795.52   51.29
   8   4  -2  787.62   51.39
  -8   4   2  880.61   51.59
  -8   4   2  902.01   50.99
   8   4  -2  792.32   50.59
  -8   4   2  826.32   50.89
   8   4  -2  814.32   52.39
  -8   4   2  857.31   51.39
  -6  -4   2   49.60    5.60
  -6  -4   2   42.90    4.70
   6  -4  -2   41.20    4.20
   6  -4  -2   49.40    4.90
  -6  -4   2   48.70    4.70
  -6  -4   2   47.60    5.10
  -6  -4   2   45.70    6.20
  -6   4   2   44.20    4.90
  -6   4   2   51.69    6.40
  -6   4   2   43.40    4.30
   6   4  -2   49.40    3.80
   6   4  -2   39.70    3.60
  -6   4   2   43.80    4.00
  -6   4   2   53.69    4.30
  -6   4   2   39.50    4.40
  -6   4   2   44.40    4.50
   6   4  -2   40.80    4.50
   6   4  -2   43.80    5.10
  -6   4   2   43.00    4.50
  -6   4   2   49.90    4.70
   6   4  -2   41.20    6.20
  -4  -4   2   86.49    6.70
  -4  -4   2   86.99    6.50
  -4  -4   2   80.19    7.10
  -4  -4   2   78.69    7.70
   4  -4  -2   98.09    6.10
  -4  -4   2   87.89    6.80
  -4  -4   2  100.99    7.60
  -4  -4   2   75.49    7.80
  -4   4   2   85.99    6.50
  -4   4   2   95.69    7.90
  -4   4   2   93.09    6.90
   4   4  -2   83.29    6.00
   4   4  -2   85.79    6.80
  -4   4   2   94.79    6.80
   4   4  -2   84.49    7.00
  -2  -4   2   38.60    3.20
  -2  -4   2   38.30    4.30
  -2  -4   2   33.60    3.70
  -2  -4   2   40.20    4.50
  -2  -4   2   38.50    3.70
  -2  -4   2   37.30    3.50
  -2  -4   2   37.40    3.40
   2  -4  -2   37.30    3.00
  -2   4   2   42.70    3.20
   2   4  -2   37.40    3.60
  -2   4   2   42.60    3.20
   2   4  -2   34.40    4.20
  -2   4   2   42.30    3.40
  -2   4   2   40.80    4.00
   0  -4  -2 1111.99   69.59
   0  -4  -2 1068.29   69.89
   0  -4   2 1092.89   69.79
   0   4   2 1031.60   69.59
   0   4  -2 1135.89   69.49
   0   4   2 1206.68   70.29
   0   4   2 1159.48   69.69
   0   4   2 1125.69   69.59
  -2  -4  -2   18.30    3.70
  -2  -4  -2   21.40    2.70
  -2  -4  -2   18.90    2.70
  -2  -4  -2   17.10    2.90
  -2  -4  -2   20.80    2.80
  -2   4  -2   17.20    2.50
   2   4   2   15.00    3.30
   2   4   2   17.40    2.30
   2   4   2   18.10    2.20
  -4  -4  -2  230.68   13.60
  -4  -4  -2  218.68   14.20
  -4  -4  -2  218.88   13.90
  -4  -4  -2  210.08   14.30
  -4  -4  -2  223.08   15.10
  -4  -4  -2  200.38   14.00
  -4   4  -2  191.98   13.40
   4   4   2  195.48   13.60
  -4   4  -2  207.88   14.40
   4   4   2  195.48   13.70
   4   4   2  204.98   13.30
   4   4   2  167.88   14.50
   6  -4   2   85.19    6.00
  -6  -4  -2   82.99    7.00
  -6  -4  -2   85.99    6.70
  -6  -4  -2   85.49    7.70
  -6  -4  -2   88.99    7.70
  -6  -4  -2   78.69    7.00
   6   4   2   65.49    8.00
   6   4   2   91.59    5.80
  -6   4  -2   65.19    7.70
  -6   4  -2   78.69    6.30
   6   4   2   86.79    5.90
  -6   4  -2   73.79    5.90
  -6   4  -2   90.69    7.70
  -6   4  -2   66.79    7.40
   6   4   2   87.79    6.00
  -6   4  -2   71.89    6.00
  -6   4  -2   74.99    6.40
   6   4   2   82.79    6.80
  -6   4  -2   81.09    6.30
   6   4   2   86.29    6.40
  -6   4  -2   74.39    6.20
  -8  -4  -2   42.00    4.40
   8  -4   2   43.90    6.50
   8  -4   2   34.20    4.20
  -8  -4  -2   40.50    4.70
  -8  -4  -2   52.99    6.10
  -8   4  -2   45.00    4.90
  -8   4  -2   41.20    4.40
   8   4   2   48.10    4.20
  -8   4  -2   40.60    4.80
  -8   4  -2   53.89    5.70
  -8   4  -2   51.79    4.90
   8   4   2   47.90    8.40
  -8   4  -2   42.40    6.20
   8   4   2   45.70    4.20
  -8   4  -2   38.90    5.90
   8   4   2   57.59    5.60
   8   4   2   54.19    5.60
   8   4   2   54.89    4.30
 -10  -4  -2   40.80    4.40
 -10  -4  -2   34.90    7.10
 -10  -4  -2   48.50    6.00
  10  -4   2   47.00    5.80
 -10  -4  -2   43.50    4.50
  10  -4   2   45.30    4.90
 -10  -4  -2   48.80    6.40
 -10  -4  -2   47.30    5.90
 -10  -4  -2   40.10    4.80
  10   4   2   46.80    4.30
 -10   4  -2   50.09    5.60
 -10   4  -2   46.80    4.70
 -10   4  -2   45.30    4.80
 -10   4  -2   47.10    5.00
  10   4   2   52.39    5.60
 -10   4  -2   42.90    5.60
  10   4   2   48.30    4.10
  10   4   2   44.50    4.30
 -10   4  -2   40.20    5.70
  10   4   2   50.89    5.50
 -10   4  -2   52.89    4.80
 -10   4  -2   36.40    4.00
 -12  -4  -2  114.49    7.90
 -12  -4  -2  106.69    8.20
 -12   4  -2  104.09    7.70
 -12   4  -2  116.59    8.00
  12   4   2  114.29    7.70
 -12   4  -2  122.19    8.00
  12   4   2  115.49    7.60
 -12   4  -2  131.39    8.30
  11  -5  -2  113.49    8.20
  11  -5  -2  110.69    8.90
 -11  -5   2  133.49    8.80
 -11  -5   2  118.49    9.90
 -11  -5   2  109.19    9.70
 -11  -5   2  121.29    9.30
 -11  -5   2  119.89    8.50
 -11  -5   2  138.39    9.60
 -11  -5   2  120.79    9.40
 -11   5   2  131.29    9.90
  11   5  -2  119.49    8.40
  11   5  -2  120.19    8.40
  11   5  -2  102.49    9.30
 -11   5   2  122.19    8.80
  11   5  -2  120.29    8.30
   9  -5  -2   12.40    3.50
  -9  -5   2    7.20    3.40
  -9  -5   2   18.60    4.40
  -9  -5   2   11.10    4.60
   9  -5  -2    8.40    2.40
  -9  -5   2    8.80    3.30
   9  -5  -2    6.10    1.90
  -9   5   2    3.30    3.70
  -9   5   2    7.50    3.30
   9   5  -2    5.10    2.10
   9   5  -2    9.20    3.20
   9   5  -2    6.00    3.00
  -9   5   2   10.70    3.10
  -9   5   2   10.00    2.90
  -9   5   2    9.20    2.60
   9   5  -2    6.30    2.20
  -9   5   2    8.50    2.20
  -9   5   2    5.10    2.30
  -9   5   2   11.80    2.60
  -9   5   2    4.30    2.60
   9   5  -2   12.70    7.10
   9   5  -2    7.50    2.20
  -9   5   2    7.50    3.60
  -9   5   2    1.80    2.20
   7  -5  -2  958.90   57.09
  -7  -5   2  900.31   57.79
  -7  -5   2  926.51   57.39
  -7  -5   2  839.52   57.19
  -7  -5   2  869.01   58.19
  -7  -5   2  879.91   57.59
   7  -5  -2  965.60   57.79
   7  -5  -2  822.92   56.49
  -7   5   2  866.41   57.29
  -7   5   2 1038.50   59.29
  -7   5   2  902.01   57.29
  -7   5   2  944.21   57.19
  -7   5   2  941.01   57.59
  -7   5   2  944.51   57.39
  -7   5   2  859.11   57.39
  -7   5   2  846.62   56.69
  -7   5   2  973.00   56.89
   7   5  -2  914.91   56.59
   7   5  -2  913.31   56.69
  -7   5   2  849.72   56.79
   7   5  -2  901.81   58.09
  -7   5   2  920.11   56.89
   7   5  -2  873.31   59.29
   7   5  -2  871.61   56.59
  -7   5   2  961.30   57.29
   7   5  -2  866.81   57.29
  -7   5   2  938.11   59.39
  -7   5   2  854.61   57.19
  -5  -5   2   51.59    4.70
  -5  -5   2   56.79    3.90
  -5  -5   2   44.00    4.60
   5  -5  -2   50.29    4.20
  -5  -5   2   52.49    7.00
  -5  -5   2   53.29    5.30
  -5  -5   2   50.59    5.60
  -5  -5   2   57.99    5.00
  -5  -5   2   50.79    5.20
  -5   5   2   50.59    5.80
   5   5  -2   45.60    4.70
   5   5  -2   47.70    4.10
  -5   5   2   50.59    4.50
  -5   5   2   47.60    4.50
  -5   5   2   50.39    4.90
   5   5  -2   45.30    6.20
   5   5  -2   52.89    5.30
  -3  -5   2   19.60    4.20
  -3  -5   2   19.70    3.30
  -3   5   2   28.30    2.90
   3   5  -2   23.90    3.30
  -3   5   2   22.90    3.80
  -3   5   2   25.60    3.00
  -3   5   2   25.90    3.20
   3   5  -2   25.90    4.10
  -1  -5   2 1504.65   99.09
  -1  -5   2 1626.94   99.29
   1  -5  -2 1627.24   99.29
  -1  -5   2 1570.74   99.29
  -1  -5   2 1701.03   99.59
   1  -5  -2 1626.54   99.69
  -1  -5   2 1689.63  100.19
  -1  -5   2 1390.96   99.39
  -1  -5   2 1419.66   99.19
  -1   5   2 1625.44   99.19
  -1   5   2 1527.55   99.39
  -1   5   2 1852.41  100.19
  -1   5   2 1599.04   99.49
  -1  -5  -2 1199.18   79.29
  -1  -5  -2 1288.17   79.19
  -1  -5  -2 1263.47   79.89
   1  -5   2 1268.07   79.19
  -1  -5  -2 1279.27   79.39
  -1   5  -2 1153.98   79.19
   1   5   2 1335.87   79.49
   1   5   2 1243.88   79.29
   1   5   2 1401.76   80.29
  -3  -5  -2  305.87   19.10
  -3  -5  -2  297.37   19.30
  -3  -5  -2  277.37   19.20
  -3  -5  -2  267.17   19.20
  -3  -5  -2  292.27   20.10
  -3  -5  -2  274.47   18.40
  -3  -5  -2  288.57   19.00
  -3  -5  -2  293.57   19.00
   3   5   2  306.87   18.80
   3   5   2  294.77   18.70
  -3   5  -2  307.77   19.40
   3   5   2  287.27   19.70
  -5  -5  -2  243.38   16.20
  -5  -5  -2  230.08   15.40
  -5  -5  -2  242.38   17.10
  -5  -5  -2  233.58   16.30
  -5  -5  -2  233.28   15.90
  -5  -5  -2  236.98   15.90
  -5   5  -2  261.57   16.70
   5   5   2  233.58   15.60
  -5   5  -2  195.78   15.10
  -5   5  -2  206.08   14.90
   5   5   2  240.48   17.00
   5   5   2  234.08   14.90
  -7  -5  -2  141.99    9.70
  -7  -5  -2  131.29   10.00
  -7  -5  -2  128.39   11.00
  -7  -5  -2  107.49    8.90
  -7  -5  -2  138.09   10.30
  -7   5  -2  117.09    9.10
  -7   5  -2  127.89    8.90
   7   5   2  127.59    8.60
   7   5   2  112.49    8.40
   7   5   2  127.49    9.60
  -7   5  -2  117.19    9.20
   7   5   2  124.09    8.70
  -7   5  -2  117.19    9.30
  -7   5  -2  130.29   10.30
   7   5   2  130.89   12.10
  -7   5  -2  112.99    8.80
  -7   5  -2  127.59    8.60
  -7   5  -2  125.79    8.80
  -7   5  -2  131.59    9.50
  -7   5  -2  133.29    9.20
  -7   5  -2  118.39    9.00
  -9  -5  -2  179.78   14.90
  -9  -5  -2  161.78   13.90
  -9  -5  -2  196.28   14.10
   9  -5   2  190.08   12.80
  -9  -5  -2  182.18   12.90
   9   5   2  179.38   12.40
   9   5   2  182.58   12.50
   9   5   2  182.68   17.90
   9   5   2  200.48   13.70
  -9   5  -2  187.48   12.80
  -9   5  -2  174.98   12.60
  -9   5  -2  196.18   13.10
  -9   5  -2  207.98   13.50
  -9   5  -2  197.28   13.10
   9   5   2  177.48   13.30
   9   5   2  187.88   12.60
  -9   5  -2  206.58   12.70
  -9   5  -2  178.48   14.00
  -9   5  -2  182.38   14.20
 -11  -5  -2   53.29    4.90
 -11  -5  -2   63.19    6.20
 -11  -5  -2   65.69    5.00
 -11  -5  -2   72.89    6.90
 -11  -5  -2   52.29    5.70
 -11  -5  -2   58.99    5.60
  11  -5   2   66.99    4.90
 -11   5  -2   64.49    5.50
 -11   5  -2   58.29    4.90
 -11   5  -2   55.49    5.60
  11   5   2   62.39    7.90
  11   5   2   62.79    4.90
 -11   5  -2   73.69    5.70
 -10  -6   2  446.06   28.90
  10  -6  -2  434.66   28.40
 -10  -6   2  406.06   29.10
 -10  -6   2  378.46   29.40
 -10  -6   2  471.95   28.60
 -10  -6   2  408.86   28.50
 -10  -6   2  471.45   29.10
  10  -6  -2  409.56   28.10
  10   6  -2  445.96   28.00
  10   6  -2  460.05   27.90
 -10   6   2  367.26   28.50
 -10   6   2  431.76   28.40
 -10   6   2  496.85   28.70
 -10   6   2  443.36   29.80
 -10   6   2  417.86   28.70
 -10   6   2  481.85   28.60
  10   6  -2  471.65   28.80
 -10   6   2  471.65   28.10
   8  -6  -2   60.99    5.50
   8  -6  -2   56.39    6.20
  -8   6   2   72.29    5.60
  -8   6   2   62.19    6.00
   8   6  -2   64.69    6.20
  -8   6   2   63.79    5.90
  -8   6   2   72.29    6.10
   8   6  -2   65.29    5.20
  -8   6   2   66.09    5.90
  -8   6   2   67.79    6.10
  -8   6   2   71.99    7.60
   8   6  -2   64.49   11.20
  -8   6   2   60.99    5.30
   8   6  -2   67.59    5.40
  -8   6   2   64.99    6.60
  -6  -6   2 1676.43  119.49
  -6  -6   2 2025.90  119.79
  -6  -6   2 1849.61  119.99
  -6  -6   2 2008.00  120.19
  -6  -6   2 1878.41  120.39
  -6  -6   2 2044.00  120.79
  -6   6   2 1720.53  119.39
  -6   6   2 1905.51  119.69
   6   6  -2 1804.22  121.39
  -6   6   2 1961.20  119.89
   6   6  -2 1950.80  119.09
   6   6  -2 2042.60  120.49
  -6   6   2 1773.22  119.59
   6   6  -2 2030.00  119.09
   6   6  -2 1953.90  119.09
  -6   6   2 2079.49  121.89
  -6   6   2 1897.61  119.89
   6   6  -2 1920.21  119.79
  -6   6   2 1935.11  119.49
  -6   6   2 1878.31  119.79
   6   6  -2 1942.71  119.69
  -6   6   2 1954.30  119.49
  -6   6   2 2116.99  119.49
   6   6  -2 1726.03  119.59
  -6   6   2 1841.52  119.39
  -4  -6   2  195.18   11.90
  -4  -6   2  163.68   14.00
   4  -6  -2  181.38   11.80
  -4  -6   2  186.18   12.50
  -4  -6   2  180.98   13.10
  -4  -6   2  194.08   12.60
  -4  -6   2  169.88   12.70
  -4   6   2  170.78   13.50
   4   6  -2  188.08   12.20
  -4   6   2  178.08   12.20
   4   6  -2  205.08   12.50
  -4   6   2  185.08   12.20
   4   6  -2  185.78   12.80
  -4   6   2  192.28   12.60
   4   6  -2  179.18   11.80
   4   6  -2  154.28   13.50
  -2  -6   2 5689.33  354.56
  -2  -6   2 5817.12  353.36
   2  -6  -2 5595.84  353.16
  -2  -6   2 5976.40  353.86
  -2  -6   2 5882.71  353.36
  -2  -6   2 5764.52  353.16
   2  -6  -2 5188.08  353.76
  -2  -6   2 5373.66  352.96
  -2  -6   2 5414.46  353.36
   2  -6  -2 5738.63  353.56
   2   6  -2 5881.01  353.86
  -2   6   2 5480.75  353.16
  -2   6   2 6325.07  354.26
   0  -6   2   24.50    2.90
   0  -6  -2   30.40    3.20
   0  -6   2   29.30    3.20
   0  -6   2   26.50    3.80
   0  -6   2   27.70    2.70
   0  -6  -2   28.50    3.10
   0  -6  -2   20.10    3.90
   0  -6  -2   29.60    3.50
   0   6   2   32.60    3.20
   0   6  -2   29.50    3.00
   0   6   2   24.80    3.50
   0   6   2   29.20    4.50
  -2  -6  -2 5373.66  320.37
  -2  -6  -2 5240.68  320.47
  -2  -6  -2 5104.89  319.87
  -2  -6  -2 5168.08  320.47
  -2  -6  -2 5168.68  321.37
   2  -6   2 4757.82  319.97
  -2  -6  -2 5351.66  320.67
   2   6   2 5568.54  320.37
   2   6   2 4562.54  321.77
  -2   6  -2 5361.76  320.67
  -4  -6  -2  268.27   18.20
  -4  -6  -2  276.07   17.80
  -4  -6  -2  292.37   18.00
  -4  -6  -2  284.87   18.50
  -4  -6  -2  268.67   18.40
  -4  -6  -2  271.57   19.50
  -4  -6  -2  294.07   17.40
   4   6   2  261.87   17.80
  -4   6  -2  259.57   18.70
   4   6   2  294.77   18.00
   4   6   2  266.07   17.40
   4   6   2  229.88   18.80
  -6  -6  -2 3058.59  191.58
  -6  -6  -2 3178.58  190.58
  -6  -6  -2 3001.30  190.98
  -6  -6  -2 3198.18  191.08
  -6  -6  -2 3242.98  191.38
   6   6   2 3100.69  189.78
   6   6   2 3095.89  189.78
  -6   6  -2 2887.31  190.28
   6   6   2 2881.31  190.18
   6   6   2 3236.28  189.88
  -6   6  -2 3065.09  190.38
  -6   6  -2 2904.01  190.38
  -6   6  -2 2771.72  189.98
   6   6   2 3371.36  193.08
  -6   6  -2 2766.32  190.08
  -6   6  -2 2985.10  190.38
  -6   6  -2 2872.61  189.98
  -6   6  -2 3429.16  190.38
  -6   6  -2 3014.30  190.58
  -6   6  -2 3067.09  189.98
  -6   6  -2 3047.99  190.18
   6   6   2 3177.68  190.68
  -8  -6  -2   66.69    6.50
  -8  -6  -2   46.50    5.00
  -8   6  -2   51.49    5.10
   8   6   2   65.29   11.10
   8   6   2   71.69    6.00
  -8   6  -2   64.59    5.60
  -8   6  -2   52.69    5.10
  -8   6  -2   45.00    4.80
  -8   6  -2   48.60    5.40
  -8   6  -2   47.50    4.80
  -8   6  -2   60.29    5.10
  -8   6  -2   58.89    6.70
  -8   6  -2   59.29    6.60
   8   6   2   58.49    4.70
   8   6   2   68.49    5.00
  -8   6  -2   59.29    4.60
 -10  -6  -2  641.54   39.10
  10  -6   2  567.44   37.90
 -10  -6  -2  591.24   39.30
 -10  -6  -2  563.94   37.80
 -10  -6  -2  571.44   37.80
 -10   6  -2  593.74   38.70
 -10   6  -2  596.94   38.90
 -10   6  -2  623.14   38.10
  10   6   2  545.35   38.10
 -10   6  -2  584.64   37.90
  10   6   2  620.74   37.50
 -10   6  -2  591.74   37.60
  10   6   2  619.34   37.50
 -10   6  -2  627.64   38.20
  10   6   2  606.44   39.00
 -11  -7   2  109.99    7.80
 -11  -7   2  108.69    7.90
 -11   7   2  111.99    8.30
  11   7  -2  118.99    7.40
  11   7  -2  104.69    7.30
 -11   7   2  110.39    8.50
  -9  -7   2   67.79    5.90
  -9  -7   2   74.49    8.00
  -9  -7   2   77.19    7.20
  -9  -7   2   86.39    7.20
  -9  -7   2   76.09    7.20
  -9  -7   2   73.09    6.80
   9  -7  -2   67.49    6.30
  -9  -7   2   80.29    7.40
  -9   7   2   71.89    6.40
  -9   7   2   71.09    6.30
   9   7  -2   74.09    5.80
  -9   7   2   86.59    6.00
   9   7  -2   65.89    7.20
   9   7  -2   73.19    5.60
   9   7  -2   70.79    5.90
  -9   7   2   87.69    6.70
  -9   7   2   69.29    6.30
  -9   7   2   76.39    7.70
  -9   7   2   79.09    5.90
  -7  -7   2  448.26   26.00
  -7  -7   2  458.55   26.60
  -7  -7   2  396.16   26.10
  -7   7   2  368.26   25.90
  -7   7   2  395.46   25.90
   7   7  -2  363.46   24.90
  -7   7   2  428.06   25.40
   7   7  -2  342.27   29.00
  -7   7   2  385.36   25.80
  -7   7   2  373.36   25.50
  -7   7   2  375.16   27.70
  -7   7   2  375.56   25.40
  -7   7   2  374.66   25.40
  -7   7   2  388.96   25.30
  -7   7   2  442.86   27.70
  -7   7   2  359.06   25.40
  -7   7   2  388.16   25.50
   7   7  -2  360.26   25.70
   7   7  -2  421.26   24.90
   7   7  -2  367.76   24.80
  -5  -7   2  861.31   56.99
  -5  -7   2  900.41   57.99
  -5  -7   2  872.01   57.59
  -5  -7   2  912.71   57.89
  -5  -7   2  944.61   58.59
  -5  -7   2  852.61   59.69
  -5  -7   2  910.21   57.59
  -5  -7   2  967.30   58.69
  -5   7   2  981.20   59.39
  -5   7   2  847.12   57.99
  -5   7   2  923.41   57.39
  -5   7   2  909.71   57.89
   5   7  -2  966.20   56.99
   5   7  -2  881.71   57.49
  -5   7   2  908.81   57.39
  -5   7   2  967.10   57.49
  -5   7   2  966.20   57.99
  -5   7   2  891.61   57.39
   5   7  -2  935.31   57.59
   5   7  -2  884.21   56.89
   5   7  -2  841.52   59.19
  -5   7   2  936.51   57.69
   5   7  -2  914.71   57.19
  -5   7   2  936.81   57.49
  -3  -7   2  149.99   10.70
  -3  -7   2  140.99   10.70
  -3  -7   2  173.18   10.90
   3  -7  -2  141.89   10.60
   3  -7  -2  129.69   10.00
  -3  -7   2  165.68   11.20
  -3  -7   2  140.29   12.20
  -3  -7   2  175.98   10.50
  -3  -7   2  152.68   10.10
  -3  -7   2  147.39   11.30
  -3   7   2  145.29   10.70
  -3   7   2  150.08   10.30
  -3   7   2  157.08   11.70
  -1  -7   2  941.31   57.39
  -1  -7   2  835.02   56.29
  -1  -7   2  900.41   55.89
  -1  -7   2  797.52   55.99
   1  -7  -2  907.61   55.99
   1  -7  -2  911.21   56.19
  -1  -7   2  909.31   56.59
  -1  -7   2  910.51   56.19
  -1  -7   2  787.12   55.69
   1  -7  -2  907.81   56.79
  -1  -7   2  901.51   56.19
   1   7  -2  916.01   56.49
  -1   7   2  977.30   57.19
  -1   7   2  915.21   56.39
  -1  -7  -2  824.12   53.69
  -1  -7  -2  869.21   53.99
   1  -7   2  875.61   53.59
   1  -7   2  792.52   53.09
   1  -7   2  859.21   54.09
  -1  -7  -2  856.71   54.69
  -1  -7  -2  844.72   53.19
  -1  -7  -2  877.61   53.69
  -1   7  -2  810.52   53.69
   1   7   2  850.21   53.69
   1   7   2  917.21   54.99
  -3  -7  -2  696.43   46.80
  -3  -7  -2  719.83   45.20
  -3  -7  -2  714.33   44.80
  -3  -7  -2  700.93   45.60
  -3  -7  -2  737.23   45.40
  -3  -7  -2  743.23   45.60
  -3  -7  -2  752.42   45.90
  -3  -7  -2  689.33   45.80
  -3   7  -2  713.23   45.90
   3   7   2  738.43   45.50
   3   7   2  667.83   46.00
  -5  -7  -2  181.68   13.10
  -5  -7  -2  197.18   13.00
  -5  -7  -2  178.28   15.10
  -5  -7  -2  192.48   13.30
  -5  -7  -2  193.98   12.20
  -5  -7  -2  202.78   12.40
  -5  -7  -2  202.68   13.60
   5   7   2  172.18   14.50
   5   7   2  173.28   12.00
   5   7   2  159.48   11.30
   5   7   2  175.38   11.60
  -5   7  -2  151.28   12.50
  -5   7  -2  159.48   11.90
  -5   7  -2  166.68   11.60
   5   7   2  179.18   12.30
  -5   7  -2  181.58   13.40
  -5   7  -2  198.48   13.40
  -5   7  -2  151.38   11.80
   5   7   2  157.28   11.90
  -5   7  -2  159.48   11.50
  -5   7  -2  162.98   12.20
  -5   7  -2  169.48   11.90
  -5   7  -2  157.68   11.60
   5   7   2  182.18   11.40
  -5   7  -2  162.18   12.70
  -5   7  -2  171.48   12.40
  -5   7  -2  167.58   12.70
  -7  -7  -2  763.82   49.50
  -7  -7  -2  774.22   49.99
  -7  -7  -2  814.52   50.89
  -7  -7  -2  760.72   50.09
  -7   7  -2  823.42   49.20
  -7   7  -2  762.82   48.70
  -7   7  -2  827.12   49.30
   7   7   2  735.93   49.10
  -7   7  -2  833.62   49.20
   7   7   2  782.42   48.60
  -7   7  -2  710.53   48.80
  -7   7  -2  741.93   49.10
  -7   7  -2  779.22   48.90
  -7   7  -2  767.52   48.60
   7   7   2  719.53   51.89
   7   7   2  803.32   48.50
   7   7   2  795.62   48.70
  -7   7  -2  835.82   50.29
   7   7   2  744.33   49.50
  -7   7  -2  771.02   49.40
  -7   7  -2  712.43   49.70
  -9  -7  -2  144.59   12.20
  -9  -7  -2  146.89   12.50
  -9  -7  -2  132.39   12.20
  -9  -7  -2  152.08   10.90
  -9  -7  -2  171.18   12.40
  -9   7  -2  146.59   10.80
  -9   7  -2  150.88   11.10
  -9   7  -2  159.78   12.00
  -9   7  -2  172.98   11.40
   9   7   2  161.98   10.50
  -9   7  -2  159.38   10.60
  -9   7  -2  146.19   11.90
   9   7   2  170.28   10.70
  -9   7  -2  181.58   11.10
   9   7   2  146.59   11.80
   9   7   2  152.38   11.60
 -11  -7  -2   39.40    3.70
 -11  -7  -2   44.70    4.70
 -11  -7  -2   49.99    3.80
 -11  -7  -2   49.90    4.10
 -11   7  -2   47.40    4.20
 -11   7  -2   54.29    4.40
 -11   7  -2   53.89    4.00
 -11   7  -2   40.70    4.20
  11   7   2   46.30    3.60
  11   7   2   46.80    3.70
 -10  -8   2    1.90    3.80
 -10  -8   2    9.40    4.30
 -10  -8   2    0.60    3.00
 -10  -8   2    4.10    2.50
 -10  -8   2    4.80    2.40
  10   8  -2    3.10    1.50
 -10   8   2    6.40    2.50
 -10   8   2    3.70    2.30
 -10   8   2    2.30    2.30
 -10   8   2    6.40    2.00
 -10   8   2    3.40    2.60
  -8  -8   2  227.08   15.80
  -8  -8   2  226.78   14.60
  -8  -8   2  237.88   15.40
  -8  -8   2  187.48   14.50
   8   8  -2  174.48   13.80
  -8   8   2  220.68   14.00
  -8   8   2  175.48   14.10
   8   8  -2  183.78   13.30
   8   8  -2  202.48   13.30
  -8   8   2  210.98   15.60
  -8   8   2  200.68   14.10
  -6  -8   2   83.69    9.60
  -6  -8   2  101.59    7.70
   6   8  -2   85.29    6.40
  -6   8   2   86.59    6.60
  -6   8   2   93.99    8.00
  -6   8   2  103.49    8.90
  -6   8   2   73.89    7.00
  -6   8   2   90.49    7.40
   6   8  -2   84.19    7.80
  -6   8   2   89.09    7.00
  -6   8   2   70.69    7.10
  -6   8   2   91.69    9.90
   6   8  -2   79.69    6.10
  -6   8   2   76.39    8.00
   6   8  -2   83.79    6.60
  -6   8   2   76.39    6.90
  -6   8   2   74.49    8.90
  -6   8   2   90.79    6.90
  -6   8   2   84.29    7.60
  -4  -8   2  176.58   13.30
  -4  -8   2  168.98   14.20
  -4  -8   2  174.78   15.50
  -4  -8   2  164.98   13.00
  -4  -8   2  214.78   13.20
   4  -8  -2  223.58   12.60
  -4  -8   2  209.28   14.30
  -4  -8   2  223.38   13.80
  -4  -8   2  185.08   12.40
  -4  -8   2  194.08   13.60
  -4  -8   2  163.38   12.50
  -4   8   2  171.78   12.80
  -4   8   2  201.88   13.00
  -4   8   2  220.38   13.40
   4   8  -2  168.58   12.90
  -4   8   2  177.78   13.40
   4   8  -2  180.08   12.30
  -4   8   2  196.08   13.40
  -4   8   2  171.48   12.60
  -4   8   2  198.88   14.60
  -4   8   2  185.68   12.70
  -4   8   2  210.18   14.60
  -4   8   2  204.98   13.10
  -4   8   2  207.88   13.10
   4   8  -2  161.28   12.90
  -2  -8   2  126.49    9.80
   2  -8  -2  152.08    9.70
  -2  -8   2  130.69   10.00
  -2  -8   2  134.69    9.20
  -2  -8   2  134.19    9.60
   2  -8  -2  141.39    9.70
  -2  -8   2  130.59   10.30
  -2  -8   2  135.19   11.60
  -2  -8   2  136.39   10.50
   2  -8  -2  140.29   10.50
  -2  -8   2  125.39    9.80
  -2   8   2  143.89    9.60
   2   8  -2  146.89   10.50
  -2   8   2  143.39   10.90
  -2   8   2  146.89   10.20
   0  -8   2  304.47   20.60
   0  -8   2  268.47   19.50
   0  -8  -2  305.37   19.70
   0  -8   2  255.77   19.10
   0  -8   2  297.47   19.50
   0  -8  -2  328.57   19.60
   0  -8  -2  311.07   20.80
   0  -8  -2  305.37   19.80
   0  -8  -2  288.87   19.20
   0  -8   2  303.17   19.80
   0  -8   2  292.87   19.30
   0   8   2  311.47   19.40
   0   8  -2  274.97   19.60
   0   8   2  322.77   20.80
   2  -8   2  163.98   11.80
  -2  -8  -2  161.38   11.60
   2  -8   2  160.98   11.20
  -2  -8  -2  160.28   11.80
  -2  -8  -2  167.48   11.90
  -2  -8  -2  169.98   11.60
  -2  -8  -2  177.48   11.80
  -2  -8  -2  163.08   13.10
   2  -8   2  144.69   10.60
  -2  -8  -2  170.38   10.80
  -2   8  -2  166.68   11.70
   2   8   2  158.28   13.10
   2   8   2  159.58   11.50
  -4  -8  -2  151.28   10.70
  -4  -8  -2  157.28   14.70
  -4  -8  -2  161.58    9.40
  -4  -8  -2  132.49   10.70
  -4  -8  -2  137.19   10.20
  -4  -8  -2  136.09   12.50
  -4   8  -2  149.88   10.00
  -4   8  -2  123.49   10.70
  -4   8  -2  129.69    9.80
  -4   8  -2  138.49    9.60
  -4   8  -2  133.39   10.10
  -4   8  -2  120.29    9.20
   4   8   2  129.49   10.30
  -4   8  -2  153.98   11.00
  -4   8  -2  132.29    9.50
  -4   8  -2  139.19   10.20
   4   8   2  127.39    9.00
  -4   8  -2  132.89   10.00
  -6  -8  -2  143.39   13.30
  -6  -8  -2  163.28   12.30
  -6  -8  -2  165.38   11.90
  -6  -8  -2  142.99   11.30
   6   8   2  133.09    9.60
  -6   8  -2  141.59   10.40
  -6   8  -2  143.89   10.20
  -6   8  -2  153.08   13.90
   6   8   2  147.39    9.80
  -6   8  -2  145.79   10.80
  -6   8  -2  140.79   11.50
  -6   8  -2  130.59   10.30
  -6   8  -2  137.49   10.00
  -6   8  -2  134.39   10.40
   6   8   2  148.19   11.00
  -6   8  -2  160.78   12.00
  -6   8  -2  118.39   11.30
  -6   8  -2  137.39   10.50
  -8  -8  -2  230.68   14.30
  -8  -8  -2  216.38   15.10
  -8  -8  -2  235.68   15.50
  -8   8  -2  207.48   14.20
  -8   8  -2  199.18   15.00
  -8   8  -2  209.18   13.80
  -8   8  -2  184.78   13.90
  -8   8  -2  183.88   13.50
   8   8   2  210.18   13.40
   8   8   2  189.78   14.90
   8   8   2  237.78   13.60
  -8   8  -2  207.78   13.50
   8   8   2  205.58   13.50
  -8   8  -2  195.78   14.40
  -8   8  -2  192.78   13.90
  -8   8  -2  204.68   15.20
  -8   8  -2  203.38   14.20
   8   8   2  198.58   14.20
 -10  -8  -2    3.60    1.80
 -10  -8  -2    3.60    4.40
 -10  -8  -2    6.00    4.00
 -10  -8  -2    5.00    2.20
 -10  -8  -2    2.60    3.00
 -10   8  -2    6.00    2.90
  10   8   2    2.40    1.60
 -10   8  -2    5.00    3.40
 -10   8  -2    7.70    2.60
  10   8   2    2.00    1.80
 -10   8  -2    5.40    1.80
  -9  -9   2   16.30    3.80
  -9  -9   2    8.80    3.80
  -9  -9   2   11.80    3.50
  -9  -9   2    4.70    3.90
  -9  -9   2   12.70    3.30
  -9  -9   2    8.40    4.40
  -9   9   2   13.90    2.50
  -9   9   2   14.30    2.50
  -9   9   2    8.50    3.00
   9   9  -2    8.70    1.90
  -9   9   2   12.60    2.50
   9   9  -2    9.70    2.80
  -9   9   2    9.50    3.30
  -7  -9   2   83.09    6.80
  -7  -9   2   88.79    7.60
  -7  -9   2   86.29    8.20
  -7   9   2   91.79    7.30
  -7   9   2   85.89    8.00
   7   9  -2   66.09    5.40
  -7   9   2   57.39    7.00
  -7   9   2   67.19    6.20
   7   9  -2   60.99    5.30
  -7   9   2   59.89    9.10
  -7   9   2   70.99    6.50
  -7   9   2   86.69    6.10
   7   9  -2   65.49    6.20
  -5  -9   2   62.49    5.90
  -5  -9   2   73.99    6.40
  -5  -9   2   72.29    5.90
  -5  -9   2   59.39   10.70
   5  -9  -2   55.79    5.30
  -5  -9   2   63.19    4.90
  -5  -9   2   61.29    7.30
  -5   9   2   63.19    5.60
  -5   9   2   59.69    6.20
  -5   9   2   58.69    5.40
  -5   9   2   59.29    6.00
   5   9  -2   53.89    9.50
  -5   9   2   66.19    9.40
  -5   9   2   53.79    7.40
  -5   9   2   52.29    5.30
  -5   9   2   62.49    5.50
  -5   9   2   52.19    4.80
   5   9  -2   58.19    4.90
  -5   9   2   69.29    6.30
  -5   9   2   53.39    5.10
  -5   9   2   63.79    5.80
  -3  -9   2  183.18   12.60
  -3  -9   2  166.08   11.70
  -3  -9   2  156.48   11.30
   3  -9  -2  149.29   11.00
   3  -9  -2  167.58   11.10
  -3  -9   2  154.88   13.80
  -3  -9   2  161.18   11.60
  -3  -9   2  170.78   11.90
  -3  -9   2  168.68   11.30
  -3  -9   2  154.48   10.70
  -3  -9   2  163.08   10.80
   3  -9  -2  141.09   11.90
  -3  -9   2  167.48   12.50
  -3   9   2  171.08   14.50
  -3   9   2  154.68   10.90
  -3   9   2  146.59   10.90
  -3   9   2  158.08   11.50
   3   9  -2  153.88   11.30
  -3   9   2  164.18   11.20
   3   9  -2  156.98   12.70
   3   9  -2  152.28   10.90
  -3   9   2  148.59   10.90
  -3   9   2  162.88   11.60
  -3   9   2  181.28   13.10
  -3   9   2  181.68   12.70
  -3   9   2  155.98   11.20
   1  -9  -2 1108.19   62.99
  -1  -9   2  964.80   61.49
  -1  -9   2 1008.50   61.49
  -1  -9   2  980.80   60.79
   1  -9  -2  992.40   61.29
  -1  -9   2  943.71   61.69
   1  -9  -2  942.31   61.39
  -1  -9   2  968.30   61.09
  -1  -9   2  895.61   61.19
   1  -9  -2  973.60   60.79
  -1  -9   2 1030.70   63.49
   1  -9  -2 1032.30   62.29
  -1   9   2  945.91   60.59
  -1   9   2 1082.99   62.79
   1   9  -2  967.00   61.69
   1   9  -2  931.61   60.99
   1   9  -2  982.40   61.59
  -1   9   2  872.11   62.39
  -1   9   2  888.41   61.79
   1  -9   2  665.53   40.10
  -1  -9  -2  675.73   43.20
  -1  -9  -2  676.23   39.30
   1  -9   2  612.04   39.70
  -1  -9  -2  645.14   39.90
   1  -9   2  608.24   39.50
   1  -9   2  667.43   41.90
   1  -9   2  547.15   39.70
  -1  -9  -2  592.54   41.10
  -1  -9  -2  624.54   40.20
  -1  -9  -2  608.44   39.90
  -1   9  -2  595.04   38.90
  -1   9  -2  554.64   39.70
  -1   9  -2  605.54   40.10
  -1   9  -2  593.94   39.40
  -1   9  -2  647.34   39.70
   1   9   2  714.63   41.70
   1   9   2  609.44   39.60
   1   9   2  619.34   39.80
   1   9   2  627.04   39.40
  -3  -9  -2  223.58   18.20
  -3  -9  -2  241.08   16.70
  -3  -9  -2  240.68   16.20
  -3  -9  -2  259.17   17.20
  -3  -9  -2  241.18   17.10
   3  -9   2  228.18   16.60
  -3  -9  -2  252.27   16.50
  -3  -9  -2  239.58   15.60
  -3  -9  -2  246.48   16.80
   3   9   2  231.68   18.60
  -3   9  -2  228.88   15.90
  -3   9  -2  263.87   17.00
   3   9   2  265.17   16.90
  -3   9  -2  230.28   16.00
   3   9   2  238.28   16.50
  -3   9  -2  232.98   17.00
   3   9   2  247.38   15.90
  -3   9  -2  243.38   16.30
  -3   9  -2  253.07   15.90
  -3   9  -2  238.78   16.40
  -3   9  -2  237.98   15.90
  -3   9  -2  219.78   16.00
  -3   9  -2  243.08   15.90
  -3   9  -2  236.28   16.00
   3   9   2  223.18   15.30
  -5  -9  -2   94.49    9.00
  -5  -9  -2   82.59    7.50
  -5  -9  -2   88.49    9.00
  -5  -9  -2   94.59   13.50
  -5  -9  -2   81.29    6.30
  -5  -9  -2   86.39    8.20
  -5  -9  -2   98.89    8.80
  -5  -9  -2   79.19    7.70
  -5   9  -2   97.49    7.20
   5   9   2   83.19    8.20
  -5   9  -2   81.49    6.50
  -5   9  -2   98.39    7.40
  -5   9  -2   96.99    6.90
   5   9   2   94.09    6.40
  -5   9  -2   85.99    6.60
   5   9   2   75.19    6.60
   5   9   2   82.79   11.00
  -5   9  -2   96.79    7.70
  -5   9  -2   80.89    8.90
  -5   9  -2   90.79    7.10
  -5   9  -2   87.39    8.20
   5   9   2   91.89    6.30
  -7  -9  -2  131.19   10.10
  -7   9  -2  124.19    9.00
   7   9   2  127.49    8.20
  -7   9  -2  131.09   10.00
   7   9   2  105.69   10.30
  -7   9  -2  136.89   10.30
  -7   9  -2  102.59    8.30
  -7   9  -2  120.99    8.30
  -7   9  -2  108.39    8.50
  -7   9  -2  131.59    9.20
   7   9   2  139.49    8.30
  -7   9  -2   98.19    8.50
  -7   9  -2  122.89    9.40
  -7   9  -2  108.69    8.30
  -7   9  -2  125.19    8.70
   7   9   2  136.59    9.20
  -7   9  -2  102.69    8.80
  -9  -9  -2   31.70    4.70
  -9  -9  -2   24.70    4.90
  -9  -9  -2   24.30    5.30
  -9  -9  -2   29.70    5.40
  -9  -9  -2   22.40    5.20
  -9  -9  -2   28.40    3.20
  -9   9  -2   27.60    3.80
   9   9   2   34.80    4.30
  -9   9  -2   33.80    3.20
   9   9   2   29.40    3.00
  -9   9  -2   24.90    3.90
  -9   9  -2   27.70    4.40
  -9   9  -2   21.20    3.60
 -10 -10   2   39.10    3.20
 -10  10   2   30.30    3.40
  10  10  -2   32.60    3.80
  -8 -10   2   12.90    3.60
  -8 -10   2   15.40    4.40
  -8 -10   2   16.90    3.70
   8  10  -2   10.70    1.80
  -8  10   2   11.30    2.70
  -8  10   2    8.80    3.70
  -8  10   2   17.30    2.80
  -8  10   2   14.40    2.50
  -8  10   2   10.80    2.30
  -8  10   2   10.60    3.50
   8  10  -2   11.50    2.70
  -6 -10   2  321.67   21.60
  -6 -10   2  322.07   20.60
  -6 -10   2  331.37   21.20
  -6 -10   2  317.27   19.40
  -6 -10   2  334.67   20.50
  -6 -10   2  285.77   22.40
  -6  10   2  290.37   19.80
   6  10  -2  291.67   20.00
  -6  10   2  303.87   22.60
  -6  10   2  305.37   19.80
  -6  10   2  305.37   20.10
  -6  10   2  317.97   20.60
  -6  10   2  270.57   19.70
  -6  10   2  287.47   20.70
   6  10  -2  262.47   19.10
  -4 -10   2   32.10    3.40
  -4 -10   2   21.70    7.10
   4 -10  -2   33.30    5.00
  -4 -10   2   19.70    4.20
   4 -10  -2   26.10    3.90
   4 -10  -2   26.80    5.10
  -4 -10   2   17.10    4.60
   4 -10  -2   36.30    4.10
  -4  10   2   27.30    4.30
  -4  10   2   16.50    4.50
   4  10  -2   23.00    3.60
   4  10  -2   13.80    5.80
  -4  10   2   27.30    3.50
  -4  10   2   21.10    4.90
  -2 -10   2  746.43   48.20
  -2 -10   2  773.22   48.20
  -2 -10   2  744.53   47.30
  -2 -10   2  781.12   49.00
   2 -10  -2  815.82   47.90
  -2 -10   2  737.93   47.20
   2 -10  -2  722.03   48.80
  -2 -10   2  782.92   47.80
  -2 -10   2  719.63   48.00
  -2 -10   2  766.52   48.60
   2 -10  -2  749.53   47.90
  -2 -10   2  722.03   50.19
   2 -10  -2  824.12   49.00
   2  10  -2  701.43   47.30
   2  10  -2  730.53   47.50
  -2  10   2  787.92   49.40
  -2  10   2  825.32   49.30
  -2  10   2  764.52   47.50
   2  10  -2  673.93   48.30
  -2  10   2  752.92   47.70
  -2  10   2  652.23   47.30
   2  10  -2  754.52   48.00
  -2  10   2  763.22   47.60
  -2  10   2  783.92   48.10
  -2  10   2  754.72   47.90
   0 -10  -2   23.20    3.70
   0 -10  -2   27.40    4.30
   0 -10   2   21.10    3.70
   0 -10   2   23.10    2.60
   0 -10   2   26.10    3.80
   0 -10  -2   26.80    3.70
   0 -10  -2   27.00    4.10
   0 -10   2   23.80    3.30
   0 -10   2   30.00    5.70
   0 -10   2   25.40    4.30
   0 -10  -2   25.30    3.00
   0 -10  -2   33.20    6.10
   0  10  -2   18.90    4.00
   0  10  -2   25.40    3.20
   0  10   2   24.90    3.20
   0  10  -2   21.40    3.30
   0  10  -2   24.50    2.60
   0  10  -2   21.10    3.60
   0  10   2   28.80    3.30
   0  10   2   32.60    5.40
   0  10   2   25.10    2.80
   0  10   2   23.90    3.50
   0  10  -2   25.80    4.50
  -2 -10  -2  337.57   20.70
   2 -10   2  285.17   21.30
   2 -10   2  286.07   20.40
   2 -10   2  309.27   20.60
  -2 -10  -2  331.67   21.30
  -2 -10  -2  319.27   20.90
  -2 -10  -2  355.16   21.00
  -2 -10  -2  288.27   22.30
   2 -10   2  283.67   20.00
   2  10   2  296.77   22.30
  -2  10  -2  315.07   20.10
  -2  10  -2  331.87   20.10
   2  10   2  310.87   19.80
   2  10   2  290.57   20.10
  -2  10  -2  272.17   20.10
  -2  10  -2  283.87   19.90
  -2  10  -2  311.07   20.60
  -2  10  -2  278.17   20.20
  -2  10  -2  308.97   20.10
  -2  10  -2  289.97   21.10
   2  10   2  343.27   20.00
  -4 -10  -2  425.36   29.50
  -4 -10  -2  469.45   30.50
  -4 -10  -2  444.66   28.80
  -4 -10  -2  449.76   30.20
  -4 -10  -2  439.56   30.50
  -4 -10  -2  436.16   29.60
  -4 -10  -2  437.46   32.30
  -4 -10  -2  483.95   31.10
  -4  10  -2  476.55   29.80
   4  10   2  445.56   28.50
  -4  10  -2  490.05   29.40
   4  10   2  418.66   29.80
  -4  10  -2  469.65   29.10
  -4  10  -2  456.25   29.70
  -4  10  -2  420.06   30.60
  -4  10  -2  463.85   29.40
  -4  10  -2  451.95   29.50
  -4  10  -2  389.86   28.60
  -4  10  -2  486.15   30.30
  -4  10  -2  502.45   30.30
   4  10   2  432.16   29.10
   4  10   2  485.65   29.20
  -4  10  -2  451.85   29.20
  -6 -10  -2  430.16   29.20
  -6 -10  -2  425.76   28.90
  -6 -10  -2  490.15   28.80
  -6 -10  -2  476.45   30.20
  -6  10  -2  428.56   28.10
  -6  10  -2  404.26   28.20
  -6  10  -2  426.46   28.40
   6  10   2  364.26   29.90
   6  10   2  419.96   27.30
  -6  10  -2  478.35   29.20
  -6  10  -2  439.86   28.70
  -6  10  -2  469.35   27.70
  -6  10  -2  422.46   27.80
   6  10   2  442.56   28.10
  -6  10  -2  413.36   27.80
  -6  10  -2  433.36   28.20
  -6  10  -2  469.35   29.30
  -6  10  -2  392.26   27.90
  -8 -10  -2   83.19    8.50
  -8 -10  -2  100.49    7.60
  -8 -10  -2   96.19    8.90
  -8 -10  -2   95.29    8.20
  -8 -10  -2   89.99    7.90
  -8  10  -2   95.09    7.30
  -8  10  -2   80.89    6.60
  -8  10  -2   95.89    8.00
   8  10   2   89.29    6.40
   8  10   2   98.59    7.40
  -8  10  -2   94.49    7.10
  -8  10  -2   77.89    6.30
  -8  10  -2  102.19    6.80
 -10 -10  -2   87.39    6.20
 -10 -10  -2   95.89    8.10
  -9 -11   2   24.00    3.60
  -9 -11   2   24.40    2.90
   9  11  -2   28.50    4.30
  -9  11   2   23.50    2.50
  -9  11   2   19.70    3.50
  -7 -11   2   43.90    5.50
  -7 -11   2   50.79    6.60
  -7 -11   2   43.10    6.10
  -7 -11   2   72.89    6.40
  -7  11   2   59.39    4.80
   7  11  -2   51.39    5.20
  -7  11   2   64.99    5.10
   7  11  -2   58.59    4.60
  -7  11   2   58.99    6.10
  -7  11   2   62.79    6.20
  -5 -11   2   19.70    3.20
  -5 -11   2   26.10    4.30
  -5 -11   2   38.20   10.20
  -5 -11   2   30.20    5.80
  -5 -11   2   21.70    4.50
  -5 -11   2   35.20    4.70
  -5  11   2   31.40    6.90
  -5  11   2   33.10    4.20
  -5  11   2   28.90    3.40
  -5  11   2   26.70    3.00
  -5  11   2   33.40    4.10
   5  11  -2   20.50    3.70
  -5  11   2   33.10    4.70
  -5  11   2   29.10    4.80
  -3 -11   2   39.50    3.70
   3 -11  -2   46.90    7.80
  -3 -11   2   36.00    7.20
  -3 -11   2   33.80    5.10
  -3 -11   2   33.20    3.80
  -3 -11   2   30.00    5.00
  -3 -11   2   30.50    4.50
   3 -11  -2   38.80    3.50
   3 -11  -2   29.10    4.90
   3 -11  -2   32.00    4.50
   3 -11  -2   36.60    4.50
  -3 -11   2   34.40    5.80
  -3 -11   2   35.80    5.90
  -3  11   2   37.90    4.70
   3  11  -2   30.20    3.90
   3  11  -2   37.20    4.30
  -3  11   2   34.10    4.40
  -3  11   2   38.00    5.10
  -3  11   2   33.80    3.50
  -3  11   2   39.40    4.50
  -3  11   2   35.30    6.50
  -3  11   2   40.40    3.90
  -3  11   2   40.50    4.60
  -1 -11   2  275.27   18.40
   1 -11  -2  275.97   19.60
   1 -11  -2  292.67   19.40
   1 -11  -2  282.57   19.20
  -1 -11   2  258.27   19.70
  -1 -11   2  288.47   20.10
  -1 -11   2  268.97   21.40
  -1 -11   2  265.27   18.80
   1 -11  -2  280.07   18.30
  -1 -11   2  257.67   19.20
  -1 -11   2  281.07   19.30
   1 -11  -2  283.27   20.60
  -1 -11   2  253.37   18.20
   1 -11  -2  294.27   19.20
   1  11  -2  300.97   19.40
  -1  11   2  327.97   19.00
   1  11  -2  328.57   20.10
  -1  11   2  277.67   18.50
  -1  11   2  298.37   19.70
  -1  11   2  280.77   20.60
  -1 -11  -2  350.96   22.20
   1 -11   2  358.76   22.90
  -1 -11  -2  381.46   23.80
   1 -11   2  332.97   22.80
  -1 -11  -2  357.26   23.40
  -1 -11  -2  367.06   23.90
   1 -11   2  336.97   22.40
   1 -11   2  331.77   24.60
   1 -11   2  337.97   23.20
   1 -11   2  325.37   23.10
  -1 -11  -2  376.26   22.90
  -1 -11  -2  319.17   24.70
  -1 -11  -2  343.17   23.20
  -1 -11  -2  344.47   23.10
   1 -11   2  322.97   22.00
   1  11   2  317.77   22.80
  -1  11  -2  335.37   22.40
  -1  11  -2  338.77   22.50
   1  11   2  320.97   24.30
   1  11   2  371.46   23.00
  -1  11  -2  349.17   22.70
  -1  11  -2  389.46   23.70
  -1  11  -2  314.97   22.60
  -3 -11  -2   28.30    5.90
   3 -11   2   25.30    6.20
  -3 -11  -2   22.20    4.50
   3 -11   2   20.40    5.30
  -3 -11  -2   28.90    4.90
  -3 -11  -2   26.10    4.30
   3 -11   2   23.80    4.00
   3 -11   2   24.90    3.80
  -3 -11  -2   23.50    4.30
  -3 -11  -2   22.80    3.10
  -3 -11  -2   33.00    8.00
   3 -11   2   19.20    3.40
  -3 -11  -2   21.00    4.30
   3 -11   2   20.00    3.10
  -3  11  -2   19.40    3.50
   3  11   2   22.40    6.30
  -3  11  -2   20.40    3.80
   3  11   2   22.90    3.20
  -3  11  -2   22.40    4.00
  -3  11  -2   23.90    3.30
  -3  11  -2   19.70    3.20
   3  11   2   16.90    3.70
  -3  11  -2   21.00    3.80
  -3  11  -2   20.70    3.70
   3  11   2   23.40    3.50
  -5 -11  -2  179.68   14.50
  -5 -11  -2  198.58   13.90
  -5 -11  -2  191.78   15.10
  -5 -11  -2  179.18   12.10
  -5 -11  -2  178.18   13.20
  -5 -11  -2  179.88   13.30
  -5 -11  -2  187.88   14.10
  -5 -11  -2  181.18   13.80
   5  11   2  173.18   12.20
  -5  11  -2  184.08   13.20
  -5  11  -2  187.58   13.20
  -5  11  -2  183.48   12.30
  -5  11  -2  189.78   13.10
  -5  11  -2  193.18   12.50
   5  11   2  177.58   12.60
  -5  11  -2  193.28   12.90
  -5  11  -2  173.48   12.20
  -5  11  -2  166.88   12.50
  -7 -11  -2   15.40    4.40
  -7 -11  -2   21.70    5.30
  -7 -11  -2   28.20    7.20
   7  11   2   19.40    3.10
  -7  11  -2   19.00    3.70
  -7  11  -2   14.10    3.10
  -7  11  -2   14.70    2.40
  -7  11  -2   13.70    2.40
  -7  11  -2   12.70    2.20
  -9 -11  -2   44.60    5.20
  -9 -11  -2   41.80    3.40
   9  11   2   38.50    3.90
  -8 -12   2  743.83   45.40
  -8 -12   2  602.24   44.10
  -8 -12   2  617.34   45.10
  -8  12   2  795.52   44.10
  -8  12   2  729.63   44.00
   8  12  -2  695.93   44.20
  -8  12   2  733.43   45.30
  -6 -12   2    6.10    2.30
  -6 -12   2    2.40    2.60
  -6 -12   2    2.80    2.70
   6 -12  -2    4.50    2.80
  -6 -12   2   -0.50    3.50
   6  12  -2    1.40    1.80
  -6  12   2    1.70    1.60
  -6  12   2    3.00    2.90
  -6  12   2    2.10    2.70
  -6  12   2    1.70    2.20
  -6  12   2   -0.30    1.90
   6  12  -2   -1.30    1.90
   4 -12  -2  418.06   27.20
  -4 -12   2  412.66   28.70
  -4 -12   2  422.86   27.70
   4 -12  -2  426.96   26.70
  -4 -12   2  411.56   28.10
   4 -12  -2  437.76   27.50
  -4 -12   2  419.36   26.90
  -4 -12   2  402.76   31.40
   4 -12  -2  413.56   28.10
  -4 -12   2  395.06   28.90
  -4 -12   2  416.66   28.00
  -4  12   2  454.65   27.70
   4  12  -2  411.56   27.10
   4  12  -2  371.86   27.60
   4  12  -2  441.86   27.20
  -4  12   2  412.96   26.90
  -4  12   2  387.36   29.60
  -4  12   2  468.15   27.80
  -4  12   2  469.35   27.50
   2 -12  -2   25.40    5.40
  -2 -12   2   24.60    5.00
  -2 -12   2   20.50    3.00
   2 -12  -2   29.60    4.50
   2 -12  -2   15.90    4.40
  -2 -12   2   21.20    3.20
   2 -12  -2   23.40    4.20
  -2 -12   2   21.30    4.70
   2 -12  -2   29.30    4.30
  -2 -12   2   21.80    4.60
  -2 -12   2   24.80    6.30
  -2 -12   2   18.20    4.20
  -2 -12   2   18.10    3.40
   2  12  -2   26.20    4.30
  -2  12   2   27.30    3.10
  -2  12   2   28.80    3.90
   2  12  -2   17.50    3.20
  -2  12   2   28.80    6.10
   2  12  -2   18.10    3.20
   2  12  -2   19.00    3.30
  -2  12   2   30.60    4.00
   0 -12  -2 1595.24  101.79
   0 -12  -2 1540.55  100.49
   0 -12   2 1798.12  100.89
   0 -12   2 1613.94  102.19
   0 -12   2 1518.55   99.89
   0 -12  -2 1574.14   99.69
   0 -12  -2 1633.04   99.09
   0 -12  -2 1591.44  100.09
   0 -12  -2 1573.84  100.19
   0 -12   2 1503.85   99.49
   0 -12  -2 1671.33  100.59
   0 -12   2 1522.25  100.29
   0 -12  -2 1664.03   99.99
   0 -12   2 1706.93  100.19
   0 -12   2 1453.75   98.99
   0 -12   2 1564.04   99.09
   0  12   2 1648.54  101.99
   0  12   2 1557.54   99.39
   0  12  -2 1594.04   99.49
   0  12  -2 1351.56   99.29
   0  12   2 1685.33   99.49
   0  12   2 1585.74   98.79
   0  12   2 1575.74   99.79
   0  12  -2 1609.74   99.39
   0  12  -2 1603.64   99.89
   0  12  -2 1608.34   98.79
   2 -12   2    1.10    2.20
  -2 -12  -2    4.80    2.40
  -2 -12  -2    4.00    4.90
   2 -12   2    2.80    1.50
   2 -12   2    3.60    3.70
   2 -12   2    4.00    2.60
  -2 -12  -2    6.30    3.10
   2 -12   2    3.10    3.40
  -2 -12  -2    3.90    3.30
   2 -12   2    5.30    2.30
  -2 -12  -2    6.20    2.80
  -2 -12  -2   10.70    3.80
  -2 -12  -2    5.50    2.00
  -2 -12  -2    1.00    2.70
   2  12   2    4.20    1.80
  -2  12  -2    2.70    2.40
  -2  12  -2    4.40    2.10
  -2  12  -2    2.00    2.20
  -2  12  -2    2.90    2.00
   2  12   2    2.80    2.20
   2  12   2    3.10    2.20
  -2  12  -2    1.40    2.40
   2  12   2    2.40    4.90
  -4 -12  -2  198.78   14.30
   4 -12   2  194.88   13.80
  -4 -12  -2  209.98   14.90
  -4 -12  -2  183.38   15.50
  -4 -12  -2  212.18   14.50
  -4 -12  -2  218.08   15.10
  -4 -12  -2  235.78   15.90
  -4 -12  -2  229.38   14.50
  -4 -12  -2  222.48   13.40
  -4 -12  -2  196.18   19.90
  -4  12  -2  195.88   14.20
  -4  12  -2  167.68   13.10
  -4  12  -2  201.08   14.20
  -4  12  -2  188.28   13.60
  -4  12  -2  192.58   13.50
  -4  12  -2  185.78   14.20
   4  12   2  194.78   13.50
   4  12   2  203.38   13.60
  -6 -12  -2    2.80    3.50
  -6 -12  -2    7.40    4.80
  -6 -12  -2   -2.00    3.70
  -6 -12  -2    0.40    3.60
  -6  12  -2    2.00    2.20
   6  12   2   -1.00    1.80
  -6  12  -2    2.80    1.50
  -6  12  -2    4.60    1.60
  -6  12  -2    0.80    2.10
  -6  12  -2    3.30    1.70
  -6  12  -2    2.10    2.90
   8  12   2  132.09    9.20
  -7 -13   2  311.77   22.80
  -7 -13   2  313.07   22.20
  -7  13   2  360.66   21.20
  -7  13   2  360.36   21.10
  -7  13   2  315.87   21.70
   7  13  -2  310.17   21.30
  -7  13   2  342.17   21.70
   5  13  -2    7.50    2.40
  -5  13   2   13.70    3.60
  -5  13   2   12.10    3.20
  -5  13   2   11.40    2.20
   5  13  -2   20.50    2.80
  -5  13   2   18.50    3.30
  -5  13   2   13.10    2.90
   3 -13  -2  298.67   21.70
   3 -13  -2  294.77   21.30
   3 -13  -2  318.37   20.40
  -3 -13   2  323.07   21.70
  -3 -13   2  312.27   22.30
  -3 -13   2  313.87   21.20
   3 -13  -2  307.67   22.30
  -3 -13   2  322.17   22.80
  -3 -13   2  325.07   21.80
   3 -13  -2  310.67   21.50
  -3 -13   2  312.87   20.60
   3 -13  -2  324.07   21.10
  -3 -13   2  308.57   25.10
  -3  13   2  291.27   20.30
   3  13  -2  310.17   20.90
  -3  13   2  319.07   21.00
   3  13  -2  308.77   20.60
  -3  13   2  353.66   22.20
   3  13  -2  328.47   20.80
  -3  13   2  341.47   21.30
  -3  13   2  345.47   21.40
  -1 -13   2  135.59   13.90
   1 -13  -2  125.99   11.70
  -1 -13   2  148.29   12.40
  -1 -13   2  170.58   11.30
   1 -13  -2  167.48   11.70
   1 -13  -2  151.28   11.20
  -1 -13   2  157.08   11.60
   1 -13  -2  147.09   12.20
  -1 -13   2  138.59   11.70
   1 -13  -2  158.38   11.90
   1 -13  -2  162.78   10.60
   1 -13  -2  145.39   13.30
  -1 -13   2  172.38   10.80
  -1  13   2  147.79   11.10
   1  13  -2  179.68   11.60
   1  13  -2  158.08   10.40
   1  13  -2  174.48   11.20
  -1  13   2  124.29   14.40
  -1  13   2  148.19   11.10
   1 -13   2  819.02   56.39
  -1 -13  -2  820.32   58.19
  -1 -13  -2  889.01   56.09
   1 -13   2  929.91   56.39
   1 -13   2  921.91   55.49
  -1 -13  -2  877.41   56.49
  -1 -13  -2  938.21   55.49
   1 -13   2  837.72   56.09
  -1 -13  -2  919.91   57.29
   1 -13   2  927.11   56.69
   1 -13   2  836.92   57.89
   1 -13   2  848.52   55.69
  -1 -13  -2  872.41   56.59
  -1 -13  -2  922.91   56.99
  -1 -13  -2  932.91   56.39
  -1  13  -2  913.61   55.89
  -1  13  -2  919.11   55.69
   1  13   2  901.61   55.99
   1  13   2  908.11   55.19
  -1  13  -2  928.41   55.69
   1  13   2  857.71   55.69
  -1  13  -2  799.82   55.69
   1  13   2  767.02   57.79
  -1  13  -2  880.41   56.19
  -3 -13  -2   18.70    4.90
  -3 -13  -2   26.80    8.90
   3 -13   2   18.70    2.80
   3 -13   2   31.50    6.60
  -3  13  -2   20.60    3.90
   3  13   2   27.20    3.30
  -5 -13  -2  372.26   24.40
  -5 -13  -2  290.27   19.80
  -5 -13  -2  330.87   22.50
  -5  13  -2  304.77   20.80
  -5  13  -2  314.37   20.70
  -5  13  -2  302.47   20.80
  -5  13  -2  280.77   19.90
   5  13   2  323.47   20.30
   5  13   2  304.87   20.10
  -5  13  -2  300.87   20.10
  -7 -13  -2   47.50    6.90
   7  13   2   42.00    3.70
  -7  13  -2   32.20    3.90
  -6 -14   2  232.88   17.50
  -6  14   2  274.97   16.20
   6  14  -2  251.37   16.20
   6  14  -2  255.27   16.20
  -6  14   2  239.08   16.80
  -6  14   2  245.98   16.00
  -4 -14   2    4.10    3.80
  -4 -14   2    1.30    3.60
   4 -14  -2   -3.30    3.70
  -4 -14   2    0.10    2.50
  -4 -14   2    2.30    1.90
  -4 -14   2    3.80    2.90
   4 -14  -2    2.20    2.40
  -4  14   2    0.70    2.40
  -4  14   2    6.80    2.90
  -4  14   2    2.40    1.40
   4  14  -2    0.60    2.10
  -4  14   2    6.50    2.50
   4  14  -2    1.90    1.70
   2 -14  -2  444.56   30.20
   2 -14  -2  433.96   29.10
  -2 -14   2  442.76   28.40
   2 -14  -2  432.66   28.80
  -2 -14   2  456.75   29.50
   2 -14  -2  455.55   28.20
  -2 -14   2  450.95   29.30
  -2 -14   2  483.85   29.00
  -2  14   2  461.55   29.00
   2  14  -2  436.76   28.10
  -2  14   2  430.46   28.80
  -2  14   2  417.46   28.60
   2  14  -2  435.26   28.70
  -2  14   2  419.06   30.00
   2  14  -2  451.25   28.60
   0 -14  -2   31.50    4.70
   0  14   2   33.70    4.20
   0  14   2   29.50    4.30
   2  14   2   73.89    6.70
   2  14   2   77.39    6.20
   2  14   2   96.09    6.70
  -4 -14  -2   -1.10    1.70
   4 -14   2    6.20    2.60
  -4 -14  -2    1.80    2.70
  -4 -14  -2   -0.60    2.60
  -4 -14  -2    3.60    3.20
  -4  14  -2    1.40    1.90
   4  14   2    2.00    1.80
  -4  14  -2    3.60    2.40
   4  14   2    2.40    2.40
  -4  14  -2    1.70    3.00
  -4  14  -2    0.60    1.60
   6  14   2  173.28   11.40
  -6  14  -2  153.78   11.70
  -6  14  -2  188.28   11.70
   5  15  -2   46.30    3.90
  -5  15   2   47.40    4.00
   5  15  -2   52.39    4.30
  -5  15   2   43.70    4.70
  -3 -15   2    5.10    4.90
   3 -15  -2   11.40    2.60
  -3 -15   2    5.80    4.50
  -3 -15   2    2.60    2.60
  -3 -15   2    3.10    2.40
  -3  15   2   11.30    2.70
   3  15  -2    2.90    1.50
  -3  15   2    6.50    3.10
   3  15  -2    3.30    3.30
  -3  15   2    6.50    3.00
   1 -15  -2   51.89    5.90
  -1 -15   2   43.50    4.50
  -1 -15   2   47.90    5.40
   1 -15  -2   66.39    5.50
  -1 -15   2   46.80    5.80
  -1 -15   2   43.70    6.90
   1 -15  -2   55.29    6.60
   1  15  -2   44.80    4.90
  -1  15   2   56.69    5.20
   1  15  -2   51.89    5.00
   1  15  -2   49.00    4.90
  -1  15   2   64.29    5.30
  -1 -15  -2  185.68   11.90
   1 -15   2  145.79   10.90
  -1 -15  -2  172.98   12.40
  -1 -15  -2  186.58   11.10
   1 -15   2  153.18   11.80
  -1 -15  -2  167.68   12.90
  -1 -15  -2  179.38   13.00
  -1  15  -2  165.38   11.70
   1  15   2  159.48   11.40
  -1  15  -2  143.89   11.50
   1  15   2  157.08   11.20
   1  15   2  158.68   11.40
  -1  15  -2  153.38   11.20
   3 -15   2   21.80    3.50
  -3 -15  -2   15.90    2.90
  -3 -15  -2   22.80    4.30
  -3 -15  -2   23.60    5.20
   3 -15   2   18.00    2.40
  -3 -15  -2   16.70    3.30
  -3 -15  -2   21.50    3.70
   3  15   2   17.00    2.80
  -3  15  -2   21.80    3.50
   3  15   2   16.60    2.90
  -3  15  -2   21.90    3.90
   3  15   2   18.40    2.70
  -3  15  -2   23.00    2.70
   5  15   2   80.39    5.90
  -5  15  -2   67.99    6.30
  -5  15  -2   90.39    6.30
   5  15   2   86.39    5.80
  -4  16   2  259.27   16.70
  -4  16   2  235.08   16.10
   4  16  -2  272.17   16.50
   4  16  -2  245.28   16.20
  -2 -16   2   75.19    6.80
   2 -16  -2   86.09    6.80
   2 -16  -2  100.89    6.20
   2  16  -2   74.49    6.90
  -2  16   2   85.49    6.60
  -2  16   2   98.89    6.60
  -2  16   2   99.49    6.90
   2  16  -2   90.59    6.70
   2  16  -2   79.59    6.40
   0 -16   2  204.38   13.10
   0 -16   2  194.18   13.70
   0  16  -2  195.98   13.40
   0  16  -2  196.58   13.10
   0  16  -2  204.88   13.50
  -2 -16  -2   20.30    3.20
   2 -16   2   12.90    2.20
   2  16   2   16.60    2.90
  -2  16  -2   14.20    2.80
  -4  16  -2   57.89    4.80
   4  16   2   68.29    4.70
  -4  16  -2   50.49    5.60
  10   0  -3    0.90    2.60
 -10   0   3   -1.40    2.70
 -10   0   3    1.30    2.20
 -10   0   3    1.60    2.60
  10   0  -3    4.70    6.80
 -10   0   3   -1.90    2.60
  10   0  -3    0.40    1.70
 -10   0   3   -1.20    2.00
 -10   0   3   -3.10    3.30
 -10   0   3    2.80    2.00
 -10   0   3    0.40    3.30
 -10   0   3    1.50    2.60
  10   0  -3   -0.50    1.70
  10   0  -3   -1.00    1.70
  -8   0   3  267.27   17.70
  -8   0   3  212.78   17.00
  -8   0   3  265.87   17.60
  -8   0   3  283.47   18.50
  -8   0   3  247.78   17.50
  -6   0   3   93.29    6.80
   6   0  -3   82.39    7.70
  -6   0   3   76.89    6.50
   6   0  -3   67.09    5.50
   6   0  -3   77.59    6.00
  -6   0   3   87.29    7.40
   6   0  -3   89.19    6.80
  -2   0   3    3.30    3.10
   2   0  -3    5.40    2.10
  -2   0   3    2.30    1.70
  -2   0   3    2.40    1.20
   2   0  -3    3.00    1.50
   0   0  -3   -0.30    1.40
   0   0   3    0.30    1.00
   0   0   3    1.40    1.10
   0   0  -3   -0.20    1.00
   0   0   3    3.30    1.50
   2   0   3    0.70    1.60
  -2   0  -3    0.20    1.10
  -6   0  -3   21.20    3.40
  -6   0  -3   21.30    3.40
   6   0   3   20.80    3.30
  -6   0  -3   14.30    3.60
   6   0   3   20.20    2.90
   6   0   3   22.00    4.30
   6   0   3   13.30    2.80
  -8   0  -3   67.89    6.90
   8   0   3   97.69    6.50
 -10   0  -3   -0.20    2.20
 -10   0  -3    2.90    2.30
 -10   0  -3    0.10    3.60
 -10   0  -3   -3.20    3.40
  10   0   3    9.40    5.10
  10   0   3    2.60    3.20
  10   0   3    1.30    1.60
  10   0   3   -2.30    1.80
 -10   0  -3    0.50    2.20
 -10   0  -3    1.10    2.10
 -10   0  -3    0.90    2.50
  10   0   3   -2.40    1.80
  10   0   3   -0.50    2.70
 -12   0  -3   12.90    2.50
  12   0   3    3.70    2.20
 -11  -1   3   49.50    5.00
  11  -1  -3   51.29    4.50
 -11  -1   3   47.70    5.70
 -11  -1   3   52.29    4.70
 -11  -1   3   48.80    5.20
  11  -1  -3   51.59    4.40
 -11  -1   3   47.90    4.90
 -11  -1   3   40.40    6.00
 -11  -1   3   49.10    5.00
  11   1  -3   48.30    4.40
 -11   1   3   48.10    5.60
  11   1  -3   56.29    6.00
 -11   1   3   48.90    4.80
 -11   1   3   50.69    5.20
 -11   1   3   41.50    6.20
 -11   1   3   54.99    4.90
  11   1  -3   50.49    4.60
 -11   1   3   47.60    5.00
  11   1  -3   59.09    8.30
 -11   1   3   47.90    5.00
  11   1  -3   49.70    4.20
   9  -1  -3  281.67   19.20
  -9  -1   3  309.57   19.70
  -9  -1   3  316.37   20.60
   9  -1  -3  307.97   20.20
   9  -1  -3  278.27   18.40
  -9  -1   3  270.87   19.00
   9  -1  -3  291.47   18.50
  -9  -1   3  268.37   19.60
  -9  -1   3  284.97   19.30
  -9  -1   3  267.87   19.20
  -9  -1   3  275.07   19.20
  -9  -1   3  304.07   20.80
  -9   1   3  300.47   19.80
  -9   1   3  304.67   18.90
   9   1  -3  253.37   21.50
   9   1  -3  282.97   19.30
  -9   1   3  268.97   19.10
  -9   1   3  289.97   20.00
  -9   1   3  289.67   20.80
   9   1  -3  293.97   18.50
   9   1  -3  265.77   18.40
  -9   1   3  263.57   19.20
  -9   1   3  249.38   18.30
  -9   1   3  294.67   19.30
  -9   1   3  304.27   19.50
   9   1  -3  287.27   18.40
   9   1  -3  285.17   20.30
  -9   1   3  277.07   19.20
   7  -1  -3   50.49    4.70
  -7  -1   3   47.70    5.20
  -7  -1   3   45.20    5.40
  -7  -1   3   67.29    7.20
   7  -1  -3   56.39    5.70
   7  -1  -3   44.10    6.60
  -7  -1   3   63.39    5.70
   7  -1  -3   43.50    4.00
  -7  -1   3   57.59    6.10
  -7   1   3   60.69    5.70
  -7   1   3   60.69    9.30
  -7   1   3   51.49    5.20
  -7   1   3   55.79    6.20
  -7   1   3   55.39    5.50
   7   1  -3   54.89    7.40
   7   1  -3   41.60    4.20
  -7   1   3   64.59    6.10
   7   1  -3   50.29    5.80
   7   1  -3   49.80    4.80
  -7   1   3   47.00    4.90
   5  -1  -3  729.73   45.40
   5  -1  -3  762.12   45.00
  -5  -1   3  672.43   44.90
  -5  -1   3  735.83   44.80
  -5  -1   3  622.84   45.00
  -5  -1   3  713.83   45.10
   5  -1  -3  652.03   44.40
  -5  -1   3  763.82   45.10
  -5   1   3  770.22   45.40
  -5   1   3  685.73   44.90
   5   1  -3  661.73   45.00
   5   1  -3  688.63   45.70
  -5   1   3  781.62   45.10
   5   1  -3  653.23   45.00
  -5   1   3  777.72   46.20
  -3  -1   3    3.50    2.10
  -3  -1   3    5.10    1.70
  -3  -1   3    4.40    1.80
  -3  -1   3    3.80    1.50
  -3  -1   3    3.90    1.80
   3  -1  -3    5.00    1.40
   3   1  -3    3.20    1.20
  -3   1   3    4.00    2.00
   3   1  -3    4.30    2.00
   3   1  -3    4.90    1.60
  -3   1   3    2.50    1.30
  -3   1   3    4.70    2.00
   1  -1  -3  684.53   42.70
   1  -1  -3  681.23   42.60
  -1  -1   3  703.83   42.60
  -1   1   3  663.93   42.80
   1   1  -3  662.03   42.90
  -1   1   3  669.13   42.70
  -1   1   3  718.83   42.90
   1  -1   3  368.66   25.60
  -1  -1  -3  384.66   25.50
  -1  -1  -3  407.16   25.70
   1  -1   3  430.76   25.70
   1  -1   3  386.26   25.50
   1   1   3  420.66   25.90
   1   1   3  455.25   25.60
  -3  -1  -3  751.52   45.90
   3  -1   3  723.53   45.70
   3  -1   3  727.13   45.50
  -3  -1  -3  749.13   46.00
  -3  -1  -3  703.53   45.50
   3   1   3  698.53   46.00
   3   1   3  765.52   45.70
   3   1   3  713.43   45.50
  -5  -1  -3  411.66   25.90
   5  -1   3  407.96   25.40
   5  -1   3  388.56   25.00
  -5  -1  -3  398.06   25.70
  -5  -1  -3  365.86   25.40
  -5  -1  -3  376.26   25.80
  -5  -1  -3  389.76   25.20
   5  -1   3  424.06   25.90
  -5   1  -3  396.26   25.50
  -5   1  -3  393.76   25.40
   5   1   3  418.86   25.60
   5   1   3  401.66   26.20
  -5   1  -3  377.16   25.40
  -7  -1  -3  140.19   10.60
  -7  -1  -3  145.49    9.90
   7  -1   3  130.59   11.10
  -7  -1  -3  129.59   10.50
   7  -1   3  131.09    9.60
  -7  -1  -3  147.39   11.00
  -7  -1  -3  136.39   10.00
   7  -1   3  144.59   10.30
  -7  -1  -3  128.89    9.80
  -7  -1  -3  154.48   12.00
   7  -1   3  132.19    9.10
  -7   1  -3  146.19   11.50
  -7   1  -3  141.59    9.90
  -7   1  -3  131.69    9.30
  -7   1  -3  131.19   10.20
  -7   1  -3  140.99    9.80
   7   1   3  133.69    9.20
   7   1   3  146.39   10.60
  -7   1  -3  130.89    9.80
   7   1   3  140.89    9.80
   7   1   3  132.89   11.80
  -7   1  -3  124.49   10.10
  -7   1  -3  155.18   11.30
  -7   1  -3  129.49   10.10
  -7   1  -3  131.59    9.70
   9  -1   3   88.59    8.30
   9  -1   3   89.69    9.50
  -9  -1  -3   82.29    6.90
   9  -1   3   81.09    6.90
  -9  -1  -3   69.39    7.80
  -9  -1  -3   65.19    8.50
   9  -1   3   88.59    7.10
  -9  -1  -3   91.09    6.90
   9  -1   3   97.99    6.40
  -9  -1  -3   94.59    7.00
  -9  -1  -3   64.59    7.50
  -9  -1  -3   80.09    7.20
   9   1   3   96.59    6.40
  -9   1  -3   68.99    8.50
  -9   1  -3   86.79    7.00
   9   1   3   71.99    7.70
   9   1   3   81.59   10.00
   9   1   3   84.39    7.20
  -9   1  -3   85.49    6.80
  -9   1  -3   79.49    7.00
  -9   1  -3   90.09    7.00
   9   1   3   89.19    6.30
  -9   1  -3   93.89    7.50
   9   1   3   82.99    6.40
 -11  -1  -3  155.68   11.00
 -11  -1  -3  129.09   11.70
  11  -1   3  168.58   11.80
 -11  -1  -3  151.58   12.30
 -11  -1  -3  163.38   11.00
  11  -1   3  162.48   10.60
  11  -1   3  176.88   10.50
 -11  -1  -3  134.39   10.60
  11  -1   3  165.68   10.80
 -11  -1  -3  150.18   11.20
  11   1   3  161.18   11.90
  11   1   3  169.18   10.80
 -11   1  -3  137.89   11.10
 -11   1  -3  186.08   11.10
 -11   1  -3  165.28   11.00
 -11   1  -3  159.28   11.00
  11   1   3  158.28   10.60
 -11   1  -3  139.89   12.00
  11   1   3  172.28   11.70
  12  -2  -3   13.90    2.30
 -12  -2   3   14.80    2.80
  12  -2  -3   16.40    1.80
 -12  -2   3   15.40    2.60
 -12  -2   3   19.20    2.70
  12  -2  -3   16.60    2.90
 -12  -2   3   15.20    2.90
  12  -2  -3   14.50    2.50
  12   2  -3   16.00    2.60
  12   2  -3   15.20    2.10
 -12   2   3   10.80    2.40
 -12   2   3   14.70    2.60
  12   2  -3   17.30    2.40
 -12   2   3   12.40    2.20
 -10  -2   3  153.58   10.90
 -10  -2   3  139.09   10.10
 -10  -2   3  142.09   10.00
 -10  -2   3  128.99    9.70
  10  -2  -3  123.99   13.00
  10  -2  -3  123.99    9.10
  10  -2  -3  121.49   10.00
  10  -2  -3  127.99   11.10
  10  -2  -3  137.19    9.10
  10  -2  -3  127.59    9.30
 -10  -2   3  148.29   10.50
 -10  -2   3  154.48   11.60
 -10  -2   3  132.69    9.60
 -10   2   3  108.19   10.20
  10   2  -3  126.99    9.40
 -10   2   3  145.79   10.30
 -10   2   3  139.19    9.90
 -10   2   3  150.98   10.30
  10   2  -3  122.59   13.50
 -10   2   3  125.09    9.90
  10   2  -3  132.79    9.30
  10   2  -3  134.99    9.30
  10   2  -3  115.39   11.30
 -10   2   3  126.29   10.20
 -10   2   3  123.69   11.10
  10   2  -3  132.39   10.30
 -10   2   3  143.89    9.60
 -10   2   3  123.19    9.10
   8  -2  -3   13.50    4.80
  -8  -2   3   25.60    5.70
   8  -2  -3   15.00    3.70
  -8  -2   3   15.20    3.70
  -8  -2   3   15.90    4.30
   8  -2  -3   14.80    2.60
   8  -2  -3   17.90    3.10
  -8  -2   3   20.30    4.10
  -8  -2   3   25.30    5.20
  -8  -2   3   18.50    5.30
  -8  -2   3   13.90    3.20
  -8   2   3   16.00    2.60
  -8   2   3   26.90    4.90
  -8   2   3   19.10    4.50
  -8   2   3   25.00    3.90
   8   2  -3   15.30    3.80
   8   2  -3   13.50    2.40
   8   2  -3   12.30    3.00
   8   2  -3   16.40    2.60
  -8   2   3   26.50    7.30
  -8   2   3   18.70    3.80
   8   2  -3   19.40    3.00
  -8   2   3   15.00    3.20
  -6  -2   3 1069.09   71.79
   6  -2  -3 1136.89   72.29
   6  -2  -3 1051.59   71.09
  -6  -2   3 1239.88   71.99
  -6  -2   3 1168.58   71.69
  -6  -2   3 1150.08   71.99
   6  -2  -3 1138.79   71.69
   6   2  -3 1141.09   72.19
  -6   2   3 1253.07   71.89
   6   2  -3 1123.19   73.09
   6   2  -3 1041.40   71.09
   6   2  -3 1059.79   71.49
  -6   2   3 1262.37   72.29
  -6   2   3 1165.68   73.19
  -6   2   3 1136.99   71.69
  -4  -2   3  143.09    9.60
  -4  -2   3  116.49   10.30
  -4  -2   3  122.59    9.50
  -4  -2   3  133.49   10.00
  -4  -2   3  134.09    9.80
   4  -2  -3  131.29    9.00
  -4  -2   3  133.89    9.80
   4  -2  -3  163.58    9.50
  -4   2   3  151.68   10.60
  -4   2   3  134.29    9.40
   4   2  -3  137.59    9.40
  -4   2   3  139.09    9.60
  -4   2   3  153.88   10.20
   4   2  -3  135.09   10.80
   4   2  -3  141.69    9.90
   2  -2  -3 6612.64  409.96
   0   2   3 3928.61  229.98
   0   2  -3 3491.15  229.68
  -2  -2  -3 8733.13  511.45
   2  -2   3 7900.61  509.65
  -2   2  -3 8347.67  509.75
   2   2   3 7917.51  511.25
  -4  -2  -3   54.59    4.90
  -4  -2  -3   58.59    5.30
  -4  -2  -3   63.19    4.90
  -4  -2  -3   62.89    5.40
  -4  -2  -3   62.19    4.70
   4  -2   3   60.29    4.40
  -4   2  -3   60.79    4.80
   4   2   3   60.99    4.80
   4   2   3   66.29    5.20
  -4   2  -3   52.59    4.50
   4   2   3   52.39    5.60
  -6  -2  -3  502.95   32.50
  -6  -2  -3  494.25   32.80
  -6  -2  -3  470.95   31.90
   6  -2   3  498.45   32.50
  -6  -2  -3  472.65   32.30
   6  -2   3  489.25   31.60
   6  -2   3  526.85   32.00
   6   2   3  496.85   31.50
  -6   2  -3  476.85   31.80
  -6   2  -3  560.44   32.20
   6   2   3  530.75   32.50
  -6   2  -3  499.25   32.20
   6   2   3  514.95   33.30
  -6   2  -3  541.65   32.00
   6   2   3  510.95   31.90
  -6   2  -3  444.76   31.90
  -6   2  -3  493.45   32.20
   8  -2   3   46.70    4.00
  -8  -2  -3   55.79    6.70
   8  -2   3   49.60    4.80
   8  -2   3   50.59    7.20
  -8  -2  -3   51.19    7.40
  -8  -2  -3   38.40    6.40
  -8  -2  -3   49.00    6.90
  -8  -2  -3   41.10    6.10
  -8  -2  -3   49.70    6.00
  -8   2  -3   47.80    4.90
  -8   2  -3   41.30    5.20
   8   2   3   49.80    5.10
   8   2   3   46.60    5.80
   8   2   3   49.20    4.40
  -8   2  -3   41.50    5.50
  -8   2  -3   44.00    5.00
  -8   2  -3   52.69    5.10
   8   2   3   47.00    8.00
   8   2   3   45.60    4.40
   8   2   3   54.09    4.10
  -8   2  -3   49.90    6.20
  -8   2  -3   46.80    4.90
  -8   2  -3   50.69    6.90
  -8   2  -3   47.10    4.80
 -10  -2  -3  423.56   29.20
 -10  -2  -3  431.56   29.10
  10  -2   3  462.75   28.80
  10  -2   3  462.25   29.40
  10  -2   3  429.26   30.10
 -10  -2  -3  461.65   29.30
 -10  -2  -3  426.86   30.60
 -10  -2  -3  432.16   30.20
  10  -2   3  446.36   28.80
 -10  -2  -3  499.75   29.20
 -10  -2  -3  459.45   29.50
 -10   2  -3  445.26   29.00
 -10   2  -3  474.55   29.70
 -10   2  -3  477.45   29.40
  10   2   3  436.76   28.80
  10   2   3  446.86   30.10
 -10   2  -3  432.76   30.50
  10   2   3  468.55   28.90
 -10   2  -3  481.45   29.30
  10   2   3  484.85   28.80
 -10   2  -3  423.46   29.10
 -12  -2  -3    6.00    2.00
 -12  -2  -3    8.00    2.70
 -12  -2  -3    6.90    1.90
  12  -2   3    8.30    1.60
  12  -2   3    5.00    1.30
 -12  -2  -3    5.30    2.10
 -12   2  -3    6.30    2.30
 -12   2  -3    5.80    1.80
 -12   2  -3    6.50    2.20
 -12   2  -3    6.00    1.90
  12   2   3    4.00    1.60
  12   2   3    7.70    1.40
  12   2   3    6.40    1.80
 -11  -3   3   11.30    2.90
 -11  -3   3   12.60    3.70
 -11  -3   3   14.40    3.10
 -11  -3   3   12.60    3.20
  11  -3  -3   17.40    2.80
 -11  -3   3   12.60    2.60
  11  -3  -3   18.30    2.50
  11  -3  -3   15.30    2.50
  11  -3  -3   14.50    3.30
 -11  -3   3   19.40    4.30
 -11  -3   3   12.80    3.90
 -11   3   3   11.40    2.70
 -11   3   3   14.40    3.80
 -11   3   3   17.60    4.40
 -11   3   3   11.20    2.90
  11   3  -3   15.20    2.40
  11   3  -3   14.70    4.90
 -11   3   3   20.00    3.10
  11   3  -3   15.20    3.30
  11   3  -3   13.10    2.50
 -11   3   3   19.00    3.40
  11   3  -3   14.40    2.80
   9  -3  -3   87.49    8.50
  -9  -3   3  104.59    8.20
   9  -3  -3   87.99    9.90
  -9  -3   3   90.99    9.30
  -9  -3   3   91.59    8.60
   9  -3  -3   84.69    7.40
  -9  -3   3  104.79    8.20
  -9  -3   3  104.69    8.00
   9  -3  -3   84.49    6.70
  -9  -3   3   92.59    7.30
  -9  -3   3   84.19    7.50
  -9   3   3  103.29    7.30
   9   3  -3   90.69    7.00
  -9   3   3  107.19    8.00
  -9   3   3   88.79    7.70
  -9   3   3   97.49    7.70
   9   3  -3   90.29    8.00
  -9   3   3   93.29    6.90
  -9   3   3   82.39    8.20
  -9   3   3   88.39    9.10
   9   3  -3   99.29    7.00
   9   3  -3   90.69    9.20
   9   3  -3   87.99   11.10
  -9   3   3   86.09    8.00
  -9   3   3  102.89    7.80
   9   3  -3   95.49    6.90
  -9   3   3   91.49    7.40
  -7  -3   3   60.69    6.10
   7  -3  -3   61.09    6.30
  -7  -3   3   65.09    5.80
  -7  -3   3   50.29    5.40
  -7  -3   3   44.80    5.80
   7  -3  -3   54.49    5.30
   7  -3  -3   42.10    4.30
   7   3  -3   55.89    4.40
  -7   3   3   53.09    5.10
   7   3  -3   50.19    4.20
  -7   3   3   56.39    6.00
   7   3  -3   49.70    5.90
  -7   3   3   51.29    5.40
  -7   3   3   51.29    6.20
   7   3  -3   46.30    5.00
  -7   3   3   56.09    5.20
  -7   3   3   46.00    4.90
  -7   3   3   55.79    4.50
  -7   3   3   55.19    5.10
  -7   3   3   45.30    4.60
   7   3  -3   42.20    4.10
  -5  -3   3  324.67   20.50
  -5  -3   3  302.47   20.80
   5  -3  -3  340.07   20.40
  -5  -3   3  333.67   20.80
   5  -3  -3  290.77   19.90
  -5  -3   3  342.77   22.40
  -5  -3   3  300.77   20.60
  -5  -3   3  296.57   21.00
   5  -3  -3  337.77   20.80
   5   3  -3  326.87   22.00
  -5   3   3  295.67   20.40
  -5   3   3  296.67   21.60
  -5   3   3  335.07   20.90
  -5   3   3  326.57   20.70
   5   3  -3  337.67   21.10
   5   3  -3  296.57   20.00
   5   3  -3  289.47   20.30
  -3  -3   3   68.69    5.60
  -3  -3   3   71.89    5.00
  -3  -3   3   55.69    5.20
  -3  -3   3   58.99    5.10
  -3  -3   3   53.59    5.90
   3   3  -3   77.89    5.50
  -3   3   3   70.79    5.30
  -3   3   3   72.89    5.10
  -3   3   3   65.29    6.00
  -3   3   3   59.99    4.80
  -1  -3   3  620.54   36.70
   1  -3  -3  580.04   36.90
  -1  -3   3  602.04   37.20
   1  -3  -3  565.14   36.60
  -1   3   3  605.94   36.90
   1   3  -3  577.04   37.20
  -1   3   3  566.74   36.70
  -1   3   3  651.23   37.40
   1   3  -3  549.54   36.80
  -1   3   3  561.14   36.70
  -1   3   3  571.54   36.80
  -3  -3  -3  665.63   42.00
  -3  -3  -3  625.84   42.10
  -3  -3  -3  700.43   42.60
  -3  -3  -3  677.73   42.10
  -3  -3  -3  695.93   42.30
  -3  -3  -3  656.53   41.70
   3   3   3  669.53   42.00
   3   3   3  621.24   41.80
   3   3   3  695.83   42.60
  -5  -3  -3  266.67   17.40
   5  -3   3  267.47   17.00
  -5  -3  -3  275.37   17.60
  -5  -3  -3  246.88   17.10
  -5  -3  -3  292.97   18.00
  -5  -3  -3  275.37   18.00
   5   3   3  239.48   17.40
  -5   3  -3  230.88   16.90
   5   3   3  270.37   18.50
   5   3   3  267.37   16.80
  -5   3  -3  267.57   17.30
   5   3   3  265.97   17.20
   7  -3   3   43.10    4.10
  -7  -3  -3   49.20    5.30
   7  -3   3   52.79    5.90
  -7  -3  -3   45.20    6.30
  -7  -3  -3   54.69    6.50
  -7  -3  -3   38.30    4.20
  -7  -3  -3   48.30    5.40
   7   3   3   44.00    5.20
  -7   3  -3   54.19    4.50
  -7   3  -3   48.10    6.20
  -7   3  -3   38.30    4.30
   7   3   3   43.10    4.10
   7   3   3   53.99    4.20
  -7   3  -3   47.00    5.10
  -7   3  -3   39.10    4.40
   7   3   3   37.00    7.00
   7   3   3   50.79    3.90
  -7   3  -3   43.50    4.20
  -7   3  -3   47.60    4.60
  -7   3  -3   53.59    4.70
   7   3   3   39.40    4.60
  -9  -3  -3   95.09    8.70
  -9  -3  -3   88.49    9.60
   9  -3   3  100.79    6.90
  -9  -3  -3   78.69    8.70
  -9  -3  -3   88.99    8.60
  -9  -3  -3  101.89    7.70
   9  -3   3   96.09    9.50
  -9  -3  -3   96.09    7.40
  -9  -3  -3   93.89    7.70
  -9  -3  -3  101.29    7.60
  -9   3  -3   99.59    8.80
  -9   3  -3   75.69    7.90
   9   3   3   94.39    7.10
  -9   3  -3   98.69    7.60
   9   3   3  100.19    7.00
  -9   3  -3  112.39    7.60
  -9   3  -3  107.09    7.70
   9   3   3   88.79   11.10
  -9   3  -3  111.09    7.50
  -9   3  -3   92.59    7.20
  -9   3  -3   83.19    7.80
   9   3   3  101.79    8.40
   9   3   3  104.49    7.10
  -9   3  -3   80.19    8.90
 -11  -3  -3  213.88   15.60
 -11  -3  -3  177.38   14.10
  11  -3   3  223.18   14.00
 -11  -3  -3  202.58   15.10
 -11  -3  -3  241.18   14.90
 -11  -3  -3  231.28   14.30
  11  -3   3  200.98   13.80
  11   3   3  214.08   14.00
 -11   3  -3  211.18   14.30
 -11   3  -3  214.38   14.30
 -11   3  -3  200.78   15.30
 -11   3  -3  220.38   14.30
  11   3   3  204.68   14.10
  11   3   3  214.18   14.80
  11   3   3  225.68   14.10
 -11   3  -3  218.78   14.60
 -12  -4   3  128.19    8.70
 -12  -4   3  129.39    8.60
  12  -4  -3  104.59    8.40
 -12  -4   3  121.09    8.60
  12   4  -3  124.19    8.30
  12   4  -3  116.09    8.40
 -12   4   3  143.99    8.80
 -12   4   3  134.69    8.90
  12   4  -3  126.09    8.40
 -10  -4   3   18.60    4.50
 -10  -4   3    9.30    4.30
 -10  -4   3   10.20    2.50
  10  -4  -3   13.50    3.20
 -10  -4   3   14.80    3.50
 -10  -4   3   15.20    4.20
  10  -4  -3   13.20    2.30
  10   4  -3   19.30    3.00
 -10   4   3   13.40    3.70
  10   4  -3   13.50    3.30
  10   4  -3   19.70    2.70
 -10   4   3   11.80    2.80
 -10   4   3   10.10    2.90
 -10   4   3   20.00    3.60
  10   4  -3   15.00    2.70
 -10   4   3    7.60    7.70
 -10   4   3   13.00    2.70
  10   4  -3    9.40    3.10
 -10   4   3   10.20    3.90
 -10   4   3    7.60    3.70
  -8  -4   3  195.28   14.60
  -8  -4   3  164.68   13.50
   8  -4  -3  178.58   13.40
   8  -4  -3  176.78   12.70
   8  -4  -3  175.28   14.50
  -8  -4   3  195.58   13.80
  -8  -4   3  177.48   13.20
  -8  -4   3  200.78   14.00
  -8  -4   3  194.98   13.70
   8   4  -3  173.88   12.30
  -8   4   3  195.28   12.70
   8   4  -3  165.78   12.40
  -8   4   3  179.38   13.20
   8   4  -3  170.48   15.90
  -8   4   3  192.28   13.90
  -8   4   3  175.08   13.40
  -8   4   3  184.98   14.80
   8   4  -3  182.58   13.50
  -8   4   3  189.58   13.30
  -8   4   3  203.88   13.40
  -8   4   3  200.78   13.20
   8   4  -3  189.58   12.40
  -8   4   3  212.78   12.90
   8   4  -3  176.58   14.20
  -6  -4   3   99.89    8.50
  -6  -4   3   87.49    7.60
  -6  -4   3   91.19    7.30
   6  -4  -3   90.69    6.50
   6  -4  -3  104.79    7.30
   6  -4  -3   94.69    8.30
  -6  -4   3  101.59    8.40
  -6  -4   3   89.49    7.60
   6   4  -3   95.99    6.60
  -6   4   3   88.79    7.50
   6   4  -3   90.69    7.40
  -6   4   3  102.39    7.10
  -6   4   3   90.29    7.40
  -6   4   3   91.09    7.40
  -6   4   3  104.19   10.10
  -6   4   3   98.69    7.40
  -6   4   3   93.09    7.80
   6   4  -3   88.79    6.60
  -6   4   3   83.49    7.20
  -6   4   3  101.69    7.30
   6   4  -3   97.89    6.80
   6   4  -3   94.09    8.00
  -4  -4   3  704.73   48.60
   4  -4  -3  730.03   48.40
  -4  -4   3  694.23   49.30
  -4  -4   3  719.63   48.60
  -4  -4   3  731.03   48.10
  -4  -4   3  683.43   48.10
   4  -4  -3  877.81   48.20
   4  -4  -3  817.62   47.90
  -4  -4   3  775.62   48.40
   4   4  -3  800.22   48.20
  -4   4   3  795.42   48.30
   4   4  -3  757.62   48.60
  -4   4   3  785.22   48.50
   4   4  -3  750.82   47.80
  -4   4   3  805.42   48.20
  -4   4   3  828.82   49.50
   2  -4  -3  135.09    8.90
  -2  -4   3  133.59    9.10
  -2  -4   3  129.59    8.80
  -2  -4   3  110.19    8.70
  -2  -4   3  112.99    8.90
  -2  -4   3  131.19    8.80
   2  -4  -3  135.49    9.10
  -2  -4   3  125.49    8.60
   2  -4  -3  128.59    8.50
  -2  -4   3  131.49    9.80
  -2   4   3  141.69    8.70
  -2   4   3  126.49    8.70
  -2   4   3  150.28    9.70
   2   4  -3  132.19    9.00
  -2   4   3  127.19    8.90
   0  -4  -3 3246.48  197.78
   0  -4  -3 3358.96  198.28
   0  -4   3 3360.06  198.08
   0  -4  -3 3172.88  197.78
   0  -4   3 2854.31  197.58
   0   4   3 3183.58  197.68
   0   4   3 3044.80  197.88
   0   4   3 3210.48  197.98
   0   4   3 3460.15  198.58
   0   4  -3 3012.70  197.58
  -2  -4  -3  281.07   17.90
  -2  -4  -3  274.57   18.50
  -2  -4  -3  252.87   17.70
  -2  -4  -3  272.37   17.60
  -2  -4  -3  264.27   17.80
   2   4   3  289.87   17.60
  -2   4  -3  276.27   17.70
   2   4   3  266.17   17.40
   2   4   3  278.67   18.10
  -4  -4  -3  671.23   42.30
  -4  -4  -3  639.14   41.60
  -4  -4  -3  692.23   42.10
  -4  -4  -3  652.83   41.90
  -4  -4  -3  649.64   41.80
  -4  -4  -3  695.73   41.60
  -4  -4  -3  683.13   41.20
  -4   4  -3  619.64   41.30
   4   4   3  659.43   41.40
   4   4   3  669.43   41.00
  -4   4  -3  576.64   41.10
   4   4   3  654.63   42.30
  -6  -4  -3  788.82   49.99
  -6  -4  -3  814.62   50.59
  -6  -4  -3  781.42   49.60
  -6   4  -3  843.62   49.50
  -6   4  -3  709.23   49.30
  -6   4  -3  891.61   50.69
   6   4   3  792.72   49.80
  -6   4  -3  785.72   49.80
   6   4   3  788.92   49.00
   6   4   3  767.32   49.40
  -6   4  -3  847.42   50.59
  -6   4  -3  671.33   49.40
  -6   4  -3  765.12   49.20
  -6   4  -3  752.22   49.50
   6   4   3  752.42   52.49
   8  -4   3  367.56   24.90
  -8  -4  -3  310.57   22.40
  -8  -4  -3  309.57   22.90
  -8  -4  -3  320.37   23.60
  -8  -4  -3  320.57   21.90
   8  -4   3  344.27   21.90
  -8  -4  -3  336.47   22.20
  -8  -4  -3  339.57   23.30
  -8  -4  -3  313.97   22.20
  -8   4  -3  332.77   22.00
  -8   4  -3  300.57   22.20
  -8   4  -3  372.66   22.70
   8   4   3  348.27   22.90
   8   4   3  328.47   21.60
  -8   4  -3  345.57   21.90
  -8   4  -3  324.97   22.10
   8   4   3  344.27   21.80
  -8   4  -3  333.97   22.30
   8   4   3  347.57   25.60
  -8   4  -3  360.66   22.00
  -8   4  -3  296.17   22.30
   8   4   3  331.27   21.70
  -8   4  -3  356.76   23.80
  -8   4  -3  370.16   22.30
  -8   4  -3  385.86   23.90
 -10  -4  -3   11.00    4.60
  10  -4   3    7.80    2.00
 -10  -4  -3    7.50    2.80
 -10  -4  -3    8.30    2.60
  10  -4   3    8.40    2.70
 -10  -4  -3    9.20    3.80
  10  -4   3    6.50    3.40
 -10  -4  -3   16.40    6.50
 -10  -4  -3    9.90    2.60
 -10   4  -3    8.60    2.10
 -10   4  -3    5.30    3.50
  10   4   3   11.30    2.70
  10   4   3    6.60    2.10
  10   4   3    7.00    3.10
  10   4   3    7.70    1.90
  10   4   3   10.90    3.10
 -10   4  -3    7.40    2.60
 -10   4  -3   12.10    2.90
 -12  -4  -3  106.49    7.30
 -12  -4  -3  122.79    7.60
 -12  -4  -3  102.29    7.90
 -12   4  -3  105.09    7.50
  12   4   3  116.19    7.30
 -12   4  -3  108.69    7.30
  12   4   3  110.59    7.40
 -12   4  -3  109.39    7.80
  12   4   3  106.49    7.40
 -11  -5   3  123.19    9.70
 -11  -5   3  123.49   11.30
 -11  -5   3  136.79   10.40
  11  -5  -3  139.69    9.50
 -11  -5   3  153.38   11.20
 -11  -5   3  137.29   10.70
  11  -5  -3  137.29   10.40
 -11   5   3  165.68   12.10
  11   5  -3  145.09   10.30
 -11   5   3  138.39   10.10
 -11   5   3  155.48    9.60
  11   5  -3  132.19    9.50
 -11   5   3  159.58   10.30
  -9  -5   3   57.89    5.70
  -9  -5   3   49.20    5.60
   9  -5  -3   39.20    4.10
  -9  -5   3   50.89    4.90
   9  -5  -3   43.50    7.40
   9  -5  -3   53.29    6.20
   9  -5  -3   56.79    5.00
  -9  -5   3   49.70    5.40
   9   5  -3   54.79    4.50
  -9   5   3   51.79    5.30
  -9   5   3   53.39    4.80
   9   5  -3   40.20    5.10
  -9   5   3   50.59    4.50
   9   5  -3   53.89    5.80
  -9   5   3   37.90    4.60
  -9   5   3   38.80    6.00
   9   5  -3   43.60    7.60
  -9   5   3   53.79    5.30
   9   5  -3   45.20    4.30
  -9   5   3   41.20    4.90
   9   5  -3   54.49    4.60
  -9   5   3   45.60    4.90
  -9   5   3   43.40    5.40
   9   5  -3   62.79   11.60
  -9   5   3   42.20    5.80
   7  -5  -3   96.99    7.90
   7  -5  -3   87.39    7.20
  -7  -5   3  103.29    8.40
  -7  -5   3  107.59    8.30
  -7  -5   3  105.29    8.80
  -7  -5   3  101.99    9.20
   7  -5  -3  111.49    8.90
   7   5  -3   98.69    7.20
  -7   5   3   97.99    7.80
  -7   5   3  108.79    8.00
   7   5  -3   97.69    7.30
  -7   5   3  100.89    8.60
  -7   5   3  104.59    8.20
  -7   5   3  110.19    9.70
  -7   5   3   89.99    8.20
   7   5  -3  106.39    7.30
  -7   5   3  106.69    7.50
  -7   5   3   98.59    8.00
  -7   5   3  114.09    8.20
  -7   5   3  100.89   10.20
   7   5  -3  107.89    8.30
   7   5  -3   91.99    8.80
  -7   5   3  112.69    7.70
   7   5  -3   94.49   10.60
  -7   5   3   82.89    7.20
  -7   5   3   89.29    7.80
  -5  -5   3   65.19    5.40
  -5  -5   3   63.59    5.60
  -5  -5   3   55.59    7.10
  -5  -5   3   54.49    4.30
  -5  -5   3   60.59    5.30
  -5  -5   3   56.09    6.10
  -5  -5   3   55.29    5.30
   5  -5  -3   68.09    5.40
   5  -5  -3   57.69    4.80
  -5  -5   3   59.99    5.80
   5   5  -3   58.29    6.80
  -5   5   3   60.59    5.10
   5   5  -3   51.39    4.50
  -5   5   3   59.89    5.00
   5   5  -3   58.09    5.70
  -5   5   3   59.49    6.60
  -5   5   3   60.19    5.60
   5   5  -3   57.59    5.20
  -3  -5   3   60.29    5.50
  -3  -5   3   65.89    4.90
  -3  -5   3   62.49    5.20
   3  -5  -3   64.39    5.00
   3  -5  -3   70.19    4.50
  -3  -5   3   59.79    5.50
  -3  -5   3   50.09    4.80
  -3  -5   3   67.29    4.50
   3  -5  -3   47.90    5.30
  -3  -5   3   53.69    6.20
  -3  -5   3   65.39    5.20
  -3   5   3   64.59    6.10
   3   5  -3   62.29    5.30
   3   5  -3   54.69    5.90
  -3   5   3   60.69    5.40
  -3   5   3   49.40    5.10
  -3   5   3   59.49    4.90
  -1  -5   3  483.75   33.20
  -1  -5   3  482.75   32.30
   1  -5  -3  507.75   32.90
   1  -5  -3  511.45   32.50
  -1  -5   3  525.85   32.80
  -1  -5   3  505.45   32.40
  -1  -5   3  495.15   32.50
   1  -5  -3  537.25   32.60
   1   5  -3  497.05   32.40
   1   5  -3  528.45   33.30
  -1   5   3  551.84   33.40
  -1   5   3  527.85   32.80
  -1   5   3  498.15   32.70
   1   5  -3  554.74   32.60
  -1   5   3  518.15   32.40
  -1  -5  -3  131.29   10.50
   1  -5   3  134.69   10.10
  -1  -5  -3  139.39    9.80
  -1  -5  -3  135.09    9.70
  -1  -5  -3  147.49   10.00
   1  -5   3  148.49    9.70
   1   5   3  141.89   10.20
   1   5   3  167.18   11.10
  -1   5  -3  126.29    9.50
   1   5   3  158.18   10.00
  -3  -5  -3  495.75   31.50
  -3  -5  -3  520.35   33.20
  -3  -5  -3  522.95   32.20
  -3  -5  -3  499.45   31.80
  -3  -5  -3  464.35   32.30
  -3  -5  -3  509.05   32.40
  -3  -5  -3  489.55   32.30
  -3  -5  -3  500.65   32.00
   3   5   3  539.55   32.00
   3   5   3  485.55   31.70
   3   5   3  507.45   32.80
   3   5   3  509.45   31.50
  -3   5  -3  494.85   32.40
  -5  -5  -3   64.89    6.20
  -5  -5  -3   66.39    8.30
  -5  -5  -3   64.69    5.90
  -5  -5  -3   62.69    5.40
  -5  -5  -3   57.49    6.30
  -5  -5  -3   72.29    6.30
   5   5   3   58.69    4.70
  -5   5  -3   53.69    4.90
  -5   5  -3   53.89    4.80
   5   5   3   60.29    7.20
  -5   5  -3   68.39    6.30
   5   5   3   66.09    4.70
   5   5   3   58.99    5.40
  -5   5  -3   76.59    5.70
   5   5   3   64.19    4.70
  -5   5  -3   59.29    5.10
  -7  -5  -3   29.50    6.10
  -7  -5  -3   39.10    5.50
  -7  -5  -3   37.80    4.50
  -7  -5  -3   30.10    3.80
  -7  -5  -3   35.70    4.80
  -7  -5  -3   26.10    4.70
   7   5   3   28.50    3.50
  -7   5  -3   42.70    5.60
  -7   5  -3   36.20    4.30
  -7   5  -3   31.60    4.00
  -7   5  -3   29.10    4.30
  -7   5  -3   38.10    6.30
   7   5   3   45.80    7.90
   7   5   3   34.00    4.50
  -7   5  -3   44.00    5.40
  -7   5  -3   39.50    4.80
  -7   5  -3   37.40    4.00
   7   5   3   42.60    4.50
  -7   5  -3   43.00    4.10
  -7   5  -3   27.60    3.30
   7   5   3   31.70    3.60
  -7   5  -3   37.80    4.30
   9  -5   3   40.00    4.60
  -9  -5  -3   37.10    6.10
  -9  -5  -3   41.10    4.20
  -9  -5  -3   46.50    4.40
  -9  -5  -3   35.40    5.50
   9  -5   3   44.60    7.20
  -9  -5  -3   43.40    6.70
   9   5   3   52.59    5.50
   9   5   3   41.60    3.80
  -9   5  -3   37.10    4.40
  -9   5  -3   41.50    5.10
  -9   5  -3   31.80    3.80
   9   5   3   24.30   11.90
   9   5   3   44.50    4.20
   9   5   3   40.30    4.00
  -9   5  -3   28.80    3.90
  -9   5  -3   33.70    5.00
  -9   5  -3   32.30    4.10
   9   5   3   42.00    5.20
  -9   5  -3   42.20    4.10
  -9   5  -3   41.30    4.40
  -9   5  -3   33.20    5.60
 -11  -5  -3   95.49    8.40
 -11  -5  -3   86.79    6.00
 -11  -5  -3   72.99    6.10
 -11  -5  -3   78.69    6.20
 -11  -5  -3   81.49    7.30
  11   5   3   84.89    5.90
 -11   5  -3   72.69    6.90
 -11   5  -3   84.59    6.00
 -11   5  -3   76.99    6.20
 -11   5  -3   90.49    6.60
  11   5   3   88.09    5.80
  11   5   3   63.29    8.10
  10  -6  -3   28.70    3.30
 -10   6   3   39.40    4.80
  10   6  -3   30.90    4.90
 -10   6   3   24.00    4.70
 -10   6   3   34.50    4.00
  -8  -6   3  296.17   21.00
  -8  -6   3  271.97   20.30
   8  -6  -3  311.57   20.20
  -8  -6   3  314.57   20.60
  -8  -6   3  262.27   19.80
   8  -6  -3  300.07   21.20
  -8  -6   3  303.77   21.40
  -8  -6   3  294.87   20.80
   8  -6  -3  290.57   19.60
  -8   6   3  327.27   22.10
   8   6  -3  307.27   20.50
   8   6  -3  255.67   20.20
   8   6  -3  298.77   19.40
   8   6  -3  301.47   19.40
   8   6  -3  309.47   21.60
   8   6  -3  290.57   24.00
  -8   6   3  317.37   19.70
  -8   6   3  291.27   20.10
  -8   6   3  334.17   20.30
  -8   6   3  320.47   20.20
  -8   6   3  294.27   20.10
  -8   6   3  298.47   19.90
   8   6  -3  297.47   19.50
  -8   6   3  317.77   20.80
  -8   6   3  315.57   19.80
  -8   6   3  290.17   20.10
   6  -6  -3  508.45   33.00
  -6  -6   3  606.84   33.50
  -6  -6   3  489.35   34.20
  -6  -6   3  575.84   33.90
   6  -6  -3  494.45   33.40
  -6  -6   3  517.35   33.60
  -6   6   3  526.25   33.70
  -6   6   3  546.25   35.10
   6   6  -3  506.05   32.70
  -6   6   3  524.95   33.30
   6   6  -3  533.65   34.10
  -6   6   3  465.15   33.30
   6   6  -3  482.35   35.40
  -6   6   3  525.35   33.20
  -6   6   3  490.45   33.40
  -6   6   3  538.05   33.40
  -6   6   3  533.65   33.10
   6   6  -3  530.95   32.60
   6   6  -3  460.65   33.20
  -6   6   3  528.65   33.00
  -6   6   3  516.55   35.30
   6   6  -3  503.25   33.30
   6   6  -3  511.15   33.30
  -6   6   3  532.95   33.30
  -6   6   3  512.75   32.90
  -6   6   3  504.25   33.00
   6   6  -3  533.85   32.70
  -6   6   3  489.55   33.40
  -4  -6   3  851.91   53.19
  -4  -6   3  853.11   53.89
  -4  -6   3  839.62   52.79
  -4  -6   3  859.11   53.99
   4  -6  -3  824.82   52.99
  -4  -6   3  781.82   54.79
  -4  -6   3  842.72   53.39
  -4  -6   3  899.11   53.59
   4  -6  -3  861.61   52.79
  -4  -6   3  786.92   53.29
   4   6  -3  835.12   53.09
   4   6  -3  861.21   52.69
   4   6  -3  775.62   54.29
   4   6  -3  931.21   53.29
  -4   6   3  864.11   53.49
  -4   6   3  816.72   53.09
  -4   6   3  854.31   53.19
  -4   6   3  884.91   54.69
   4   6  -3  830.52   53.69
   2  -6  -3  358.76   21.50
  -2  -6   3  332.17   22.60
   2  -6  -3  313.67   20.70
  -2  -6   3  310.27   20.50
  -2  -6   3  269.87   20.80
  -2  -6   3  278.37   22.60
  -2  -6   3  317.97   22.30
  -2  -6   3  328.07   20.80
  -2  -6   3  327.17   21.10
  -2  -6   3  323.07   21.40
   2  -6  -3  335.87   20.80
  -2   6   3  346.37   21.30
  -2   6   3  338.57   20.90
  -2   6   3  363.06   22.10
   2   6  -3  308.87   21.60
   2   6  -3  335.27   21.10
   0  -6  -3   19.70    2.90
   0  -6   3   21.30    3.40
   0  -6   3   22.10    2.50
   0  -6  -3   19.90    3.30
   0  -6  -3   25.90    4.00
   0  -6   3   20.20    2.60
   0  -6   3   18.50    2.80
   0  -6   3   19.40    2.60
   0  -6   3   20.20    2.50
   0  -6  -3   19.30    2.80
   0   6   3   31.70    4.90
   0   6   3   32.50    6.30
   0   6   3   21.60    3.00
   0   6  -3   20.40    2.50
  -2  -6  -3   75.79    7.90
  -2  -6  -3   89.79    6.70
  -2  -6  -3   65.59    5.80
  -2  -6  -3   63.19    6.40
  -2  -6  -3   85.99    6.60
   2   6   3   79.99    7.40
   2   6   3   80.89    6.50
  -4  -6  -3   98.29    7.60
  -4  -6  -3   92.09    7.90
  -4  -6  -3   95.39    9.20
  -4  -6  -3   90.49    6.50
  -4  -6  -3  102.69    7.30
  -4  -6  -3   96.09    7.80
  -4  -6  -3  102.79    8.40
  -4  -6  -3   92.89    7.10
   4   6   3  103.09    7.40
   4   6   3   91.89    8.50
   4   6   3   89.69    6.60
   4   6   3   88.09    7.10
  -4   6  -3   89.19    7.70
  -6  -6  -3  640.44   39.80
  -6  -6  -3  593.84   39.20
  -6  -6  -3  640.84   38.80
  -6  -6  -3  650.03   40.10
  -6   6  -3  570.44   38.70
   6   6   3  586.14   38.50
   6   6   3  568.44   38.80
  -6   6  -3  679.53   39.70
  -6   6  -3  619.14   38.60
  -6   6  -3  607.24   38.50
   6   6   3  624.44   38.00
  -6   6  -3  540.05   38.20
  -6   6  -3  553.14   38.20
   6   6   3  588.94   40.50
  -6   6  -3  594.64   38.60
  -6   6  -3  583.54   38.30
   6   6   3  619.54   38.00
  -6   6  -3  570.24   38.20
   6   6   3  638.84   38.10
  -6   6  -3  633.04   39.90
  -8  -6  -3   49.40    5.50
  -8  -6  -3   58.39    6.60
  -8  -6  -3   49.99    6.30
  -8  -6  -3   61.09    5.60
  -8  -6  -3   58.59    7.30
  -8   6  -3   66.99    5.70
   8   6   3   64.89    5.20
  -8   6  -3   64.89    6.00
   8   6   3   58.39    6.10
   8   6   3   60.49    5.20
  -8   6  -3   59.09    5.70
   8   6   3   61.09    6.30
   8   6   3   60.99    4.90
  -8   6  -3   70.49    5.30
   8   6   3   60.99   11.70
  -8   6  -3   60.99    5.60
  -8   6  -3   61.69    5.50
  -8   6  -3   63.09    6.50
  -8   6  -3   63.29    5.40
  -8   6  -3   62.69    7.10
  -8   6  -3   57.89    5.10
 -10  -6  -3   92.59   10.20
 -10  -6  -3   69.29    7.80
 -10  -6  -3   99.89    8.80
  10   6   3   90.09    6.40
 -10   6  -3   97.19    7.50
 -10   6  -3   79.59    7.10
 -10   6  -3   86.69    7.00
  10   6   3  107.39    7.90
 -11  -7   3   64.59    5.10
 -11  -7   3   58.69    5.10
 -11   7   3   57.69    5.60
 -11   7   3   71.59    5.00
 -11   7   3   53.49    4.80
  11   7  -3   64.09    4.40
  11   7  -3   56.69    4.40
  -9  -7   3   48.10    4.50
   9  -7  -3   47.30    5.00
  -9  -7   3   53.59    5.40
  -9   7   3   37.40    4.50
  -9   7   3   43.50    7.70
  -9   7   3   54.99    4.50
   9   7  -3   59.49    4.40
  -9   7   3   41.30    5.80
   9   7  -3   45.70    4.10
  -9   7   3   46.60    6.10
  -9   7   3   54.59    4.60
  -9   7   3   41.10    4.50
  -9   7   3   47.30    4.90
  -7  -7   3  905.91   56.69
  -7  -7   3  875.71   55.59
  -7  -7   3  853.21   56.09
  -7  -7   3  919.21   55.99
   7  -7  -3  895.01   55.29
   7  -7  -3  845.92   54.79
  -7  -7   3  791.22   55.99
  -7   7   3  926.81   55.19
  -7   7   3  817.72   55.39
   7   7  -3  856.81   55.49
   7   7  -3  915.11   54.79
  -7   7   3 1014.10   57.79
  -7   7   3  847.02   55.19
   7   7  -3  829.12   54.79
  -7   7   3  842.42   55.09
   7   7  -3  837.52   55.59
  -7   7   3  956.50   55.59
  -7   7   3  837.12   55.49
  -7   7   3  876.31   55.49
  -7   7   3  847.82   55.59
   7   7  -3  863.31   59.19
   7   7  -3  905.31   54.79
  -7   7   3  895.41   55.99
  -7   7   3  842.72   55.39
  -5  -7   3   50.39    6.60
  -5  -7   3   55.79    4.70
  -5  -7   3   59.39    9.10
  -5  -7   3   57.59    5.50
  -5  -7   3   59.69    5.80
  -5  -7   3   74.19    6.20
  -5  -7   3   57.39    4.70
   5   7  -3   51.69    4.80
  -5   7   3   62.89    5.40
  -5   7   3   60.59    5.60
  -5   7   3   60.29    6.70
  -5   7   3   62.29    5.20
  -5   7   3   57.19    5.40
  -5   7   3   59.39    7.40
   5   7  -3   64.29    4.70
   5   7  -3   65.09    9.30
  -5   7   3   69.49    5.90
   5   7  -3   55.89    4.60
  -5   7   3   66.89    5.60
   5   7  -3   65.39    6.80
  -3  -7   3  566.54   35.40
  -3  -7   3  591.94   34.90
  -3  -7   3  517.75   36.30
   3  -7  -3  526.85   34.70
  -3  -7   3  504.55   34.70
   3  -7  -3  521.65   34.20
  -3  -7   3  552.44   34.50
   3  -7  -3  538.15   34.20
  -3  -7   3  582.94   35.20
  -3  -7   3  467.55   34.70
  -3  -7   3  574.44   34.20
  -3  -7   3  553.64   34.80
   3   7  -3  504.65   37.90
  -3   7   3  575.14   35.90
  -3   7   3  546.45   34.50
  -3   7   3  552.54   34.90
  -1  -7   3  367.26   25.10
   1  -7  -3  410.46   25.70
  -1  -7   3  340.47   25.40
  -1  -7   3  383.36   25.90
   1  -7  -3  400.96   25.60
  -1  -7   3  406.66   25.70
  -1  -7   3  414.16   26.90
  -1  -7   3  401.66   25.40
  -1  -7   3  398.76   25.60
   1  -7  -3  420.96   26.50
  -1  -7   3  405.76   26.10
  -1   7   3  402.96   25.60
   1   7  -3  394.76   25.60
  -1   7   3  386.56   25.70
  -1   7   3  407.96   26.00
  -1   7   3  454.85   27.00
  -1  -7  -3  988.20   59.79
   1  -7   3 1012.40   59.79
   1  -7   3  885.01   59.29
  -1  -7  -3 1001.30   59.39
   1  -7   3  935.31   60.19
  -1  -7  -3  976.20   60.89
  -1  -7  -3  948.81   59.99
  -1  -7  -3  951.80   59.99
   1  -7   3  814.02   59.49
  -1   7  -3  934.81   59.79
   1   7   3 1024.80   61.29
   1   7   3  945.41   59.89
  -3  -7  -3   22.60    3.70
  -3  -7  -3   30.70    4.10
  -3  -7  -3   24.00    4.10
  -3  -7  -3   16.50    4.80
   3   7   3   22.20    2.90
   3   7   3   25.70    3.80
  -5  -7  -3  510.45   32.90
  -5  -7  -3  509.85   34.30
  -5  -7  -3  509.15   32.30
  -5  -7  -3  502.55   33.40
  -5  -7  -3  519.05   33.20
  -5  -7  -3  528.25   32.90
  -5  -7  -3  458.15   31.90
  -5   7  -3  460.35   31.60
  -5   7  -3  527.35   33.00
  -5   7  -3  517.75   32.20
   5   7   3  477.15   31.40
  -5   7  -3  529.65   33.30
  -5   7  -3  504.65   32.00
  -5   7  -3  536.05   32.70
   5   7   3  478.75   33.90
  -5   7  -3  498.55   31.80
  -5   7  -3  556.74   32.80
  -5   7  -3  472.65   31.60
   5   7   3  504.05   32.50
   5   7   3  500.45   31.50
  -5   7  -3  502.55   31.90
  -5   7  -3  495.95   32.30
  -5   7  -3  468.95   32.20
   5   7   3  475.45   31.90
  -5   7  -3  476.85   31.80
  -7  -7  -3   30.80    5.10
  -7   7  -3   37.70    5.30
  -7   7  -3   31.30    4.30
  -7   7  -3   31.00    4.00
   7   7   3   31.70    8.50
  -7   7  -3   29.70    3.50
   7   7   3   38.10    5.30
   7   7   3   39.20    3.80
  -7   7  -3   32.50    4.00
  -7   7  -3   32.50    4.60
  -7   7  -3   33.50    4.00
  -7   7  -3   30.70    5.60
  -7   7  -3   33.80    4.50
   7   7   3   36.30    3.50
  -7   7  -3   36.70    3.90
  -7   7  -3   33.20    4.30
  -7   7  -3   35.90    3.50
  -9  -7  -3  336.47   25.70
  -9  -7  -3  379.96   24.90
  -9  -7  -3  391.46   25.00
  -9  -7  -3  323.27   25.90
  -9  -7  -3  386.56   26.30
   9   7   3  416.26   24.60
   9   7   3  372.96   25.90
  -9   7  -3  376.46   26.20
  -9   7  -3  395.26   25.40
   9   7   3  394.66   24.70
  -9   7  -3  419.56   25.30
  -9   7  -3  406.96   26.10
  -9   7  -3  390.86   25.10
   9   7   3  376.26   25.70
  -9   7  -3  412.66   25.10
  -9   7  -3  407.86   24.80
 -11  -7  -3   19.90    3.50
 -11  -7  -3   19.30    2.50
 -11  -7  -3   22.70    2.50
 -11   7  -3   22.90    3.00
 -11   7  -3   16.00    2.80
  11   7   3   22.90    2.20
  11   7   3   16.30    2.10
 -11   7  -3   16.20    3.00
 -10  -8   3   11.00    3.40
 -10  -8   3   15.10    3.20
 -10  -8   3   12.70    4.10
 -10  -8   3   18.30    3.50
 -10   8   3    8.00    2.20
 -10   8   3   14.00    3.70
  10   8  -3   11.90    1.80
 -10   8   3   10.10    2.50
  10   8  -3   20.20    2.80
 -10   8   3   12.40    2.90
 -10   8   3   12.60    2.80
  -8  -8   3  518.95   37.40
  -8  -8   3  603.84   37.20
  -8  -8   3  572.04   38.00
  -8  -8   3  537.55   37.30
   8  -8  -3  520.75   36.20
  -8  -8   3  493.85   36.80
  -8   8   3  566.84   36.60
  -8   8   3  575.74   36.80
   8   8  -3  556.74   35.90
  -8   8   3  616.94   36.40
   8   8  -3  584.04   36.60
  -8   8   3  633.34   36.50
  -8   8   3  633.74   36.80
  -8   8   3  583.14   37.10
  -8   8   3  560.54   36.50
  -8   8   3  562.04   36.70
  -8   8   3  532.75   36.70
  -8   8   3  624.44   38.70
   8   8  -3  586.04   36.00
  -8   8   3  567.64   37.30
   6  -8  -3  361.16   24.40
  -6  -8   3  372.96   26.40
  -6  -8   3  361.56   24.30
  -6  -8   3  383.76   25.90
  -6  -8   3  383.66   26.80
   6  -8  -3  390.56   25.00
  -6  -8   3  368.56   25.40
  -6  -8   3  359.56   25.20
   6   8  -3  386.76   24.50
  -6   8   3  445.66   27.30
  -6   8   3  397.16   25.10
  -6   8   3  413.36   25.30
  -6   8   3  380.36   25.30
   6   8  -3  371.06   24.30
   6   8  -3  385.46   24.30
  -6   8   3  403.56   25.60
  -6   8   3  400.06   25.90
  -6   8   3  368.06   27.10
  -6   8   3  362.96   24.80
  -6   8   3  380.96   25.10
  -6   8   3  385.66   27.50
  -4  -8   3  336.07   25.00
   4  -8  -3  315.87   22.20
  -4  -8   3  348.27   21.70
  -4  -8   3  341.77   23.30
  -4  -8   3  342.07   21.60
  -4  -8   3  327.87   22.40
   4  -8  -3  351.36   21.70
  -4  -8   3  343.57   23.10
  -4  -8   3  330.77   22.20
  -4  -8   3  372.96   22.30
  -4  -8   3  351.06   22.60
   4   8  -3  339.37   21.40
   4   8  -3  329.17   21.90
  -4   8   3  338.57   22.20
  -4   8   3  323.37   21.90
  -4   8   3  336.67   21.90
  -4   8   3  294.97   22.00
  -4   8   3  299.47   21.70
  -4   8   3  340.37   22.60
  -4   8   3  339.47   22.00
  -4   8   3  375.66   23.80
  -4   8   3  331.57   22.20
  -4   8   3  341.27   23.90
  -4   8   3  348.37   22.50
  -4   8   3  351.06   22.40
  -2  -8   3    8.20    2.90
  -2  -8   3    5.20    2.40
  -2  -8   3    2.90    1.80
  -2  -8   3    5.20    2.00
  -2  -8   3    7.00    2.00
   2  -8  -3    3.60    2.50
   2  -8  -3    4.40    1.90
  -2  -8   3    4.30    2.60
   2  -8  -3    2.20    1.60
  -2  -8   3    5.90    2.50
  -2   8   3    5.80    2.70
   2   8  -3    1.50    2.30
  -2   8   3    4.50    2.80
  -2   8   3    4.80    1.80
  -2   8   3    5.80    2.00
  -2   8   3    6.70    2.30
   0  -8  -3  820.02   51.49
   0  -8   3  801.12   51.89
   0  -8  -3  896.21   52.29
   0  -8  -3  812.32   53.09
   0  -8   3  904.41   52.39
   0  -8   3  846.32   53.19
   0  -8   3  804.82   51.69
   0  -8   3  830.32   51.79
   0  -8   3  753.12   51.49
   0  -8   3  775.52   52.09
   0  -8  -3  838.82   51.99
   0  -8  -3  816.82   52.19
   0   8  -3  791.22   51.89
   0   8   3  794.52   51.99
   0   8   3  877.91   53.59
  -2  -8  -3  139.39    9.30
  -2  -8  -3  137.19   11.60
  -2  -8  -3  136.79   10.10
  -2  -8  -3  136.49   10.30
   2  -8   3  119.19    9.20
   2  -8   3  144.29    9.70
  -2  -8  -3  147.39   10.60
   2  -8   3  139.39   11.20
   2  -8   3  137.79   10.30
  -2  -8  -3  141.19   10.40
  -2   8  -3  142.49   10.50
  -2   8  -3  129.19   10.00
   2   8   3  144.29   10.20
  -2   8  -3  134.99    9.50
   2   8   3  157.18   12.30
  -2   8  -3  132.09   10.10
  -2   8  -3  143.89    9.70
  -4  -8  -3 1571.84   97.69
  -4  -8  -3 1619.94   98.29
  -4  -8  -3 1610.14   99.39
  -4  -8  -3 1574.04  100.19
  -4  -8  -3 1687.73   99.09
  -4  -8  -3 1545.55   98.29
  -4  -8  -3 1663.93   98.89
  -4  -8  -3 1627.94   99.09
  -4   8  -3 1555.94   97.99
  -4   8  -3 1504.95   98.39
  -4   8  -3 1610.64   99.19
   4   8   3 1594.94   97.59
   4   8   3 1523.55   97.49
  -4   8  -3 1591.64   98.19
  -4   8  -3 1582.74   98.09
  -4   8  -3 1413.86   97.99
  -4   8  -3 1555.84   98.39
  -4   8  -3 1523.95   98.19
   4   8   3 1560.24   98.59
  -4   8  -3 1408.26   97.79
  -4   8  -3 1468.35   97.79
  -4   8  -3 1751.82   99.09
   4   8   3 1581.84   97.99
  -6  -8  -3  198.78   18.10
  -6  -8  -3  181.58   14.10
  -6  -8  -3  172.38   13.60
  -6  -8  -3  175.68   12.60
  -6  -8  -3  168.88   13.30
   6   8   3  164.28   12.80
  -6   8  -3  159.68   12.20
  -6   8  -3  163.28   11.90
   6   8   3  163.58   11.30
  -6   8  -3  184.38   12.20
   6   8   3  159.08   11.40
  -6   8  -3  164.58   11.60
  -6   8  -3  178.28   12.60
  -6   8  -3  197.58   13.70
  -6   8  -3  170.78   11.70
   6   8   3  172.88   11.50
   6   8   3  170.08   12.70
  -6   8  -3  179.18   12.20
  -6   8  -3  178.98   11.80
  -8  -8  -3  486.25   36.00
  -8  -8  -3  556.14   36.30
  -8  -8  -3  544.05   36.90
  -8  -8  -3  506.65   35.50
  -8  -8  -3  554.24   35.00
  -8   8  -3  511.75   34.60
  -8   8  -3  571.54   36.20
  -8   8  -3  617.84   35.40
   8   8   3  580.34   35.20
  -8   8  -3  499.25   34.80
  -8   8  -3  565.94   35.20
  -8   8  -3  608.54   35.00
   8   8   3  572.54   34.70
   8   8   3  484.35   34.60
  -8   8  -3  562.04   35.60
   8   8   3  490.75   35.80
   8   8   3  553.04   34.60
  -8   8  -3  591.74   36.40
  -8   8  -3  548.35   34.70
  -8   8  -3  571.24   35.30
  -8   8  -3  559.94   35.00
 -10  -8  -3    8.40    3.70
 -10  -8  -3    8.00    3.60
 -10  -8  -3    5.20    2.00
 -10  -8  -3    7.40    4.30
 -10  -8  -3   10.90    2.30
 -10   8  -3    8.20    2.40
 -10   8  -3   10.40    3.20
  10   8   3    6.60    1.60
  10   8   3    8.50    1.70
 -10   8  -3    9.60    2.20
 -10   8  -3    7.90    3.10
 -10   8  -3   10.20    2.80
  -9  -9   3    4.90    3.80
  -9  -9   3    8.10    3.20
  -9  -9   3    9.30    3.30
   9   9  -3    3.60    1.50
  -9   9   3    4.50    2.90
  -9   9   3    4.70    1.90
   9   9  -3    8.00    2.50
  -9   9   3    5.40    1.70
  -9   9   3    1.40    3.40
  -9   9   3    7.40    2.30
  -7  -9   3  313.57   23.00
  -7  -9   3  300.77   21.90
   7  -9  -3  347.37   21.30
  -7  -9   3  347.27   22.20
  -7  -9   3  322.87   22.50
  -7   9   3  372.16   23.80
   7   9  -3  297.17   20.70
  -7   9   3  312.07   24.10
  -7   9   3  351.76   22.50
  -7   9   3  340.57   21.50
  -7   9   3  330.17   21.40
  -7   9   3  341.87   21.50
   7   9  -3  329.77   21.60
  -7   9   3  307.07   21.50
   7   9  -3  315.37   20.90
  -7   9   3  300.17   22.00
  -7   9   3  352.16   21.90
  -5  -9   3  270.77   18.80
  -5  -9   3  271.07   18.00
  -5  -9   3  269.87   18.90
   5  -9  -3  264.27   18.00
   5  -9  -3  274.67   18.30
  -5  -9   3  279.77   20.20
  -5  -9   3  287.17   18.90
  -5  -9   3  285.37   20.00
  -5  -9   3  267.37   22.60
  -5  -9   3  269.27   19.20
  -5   9   3  297.07   18.80
  -5   9   3  268.87   18.00
  -5   9   3  265.17   18.30
  -5   9   3  258.47   18.30
  -5   9   3  280.47   19.40
   5   9  -3  247.68   21.10
   5   9  -3  295.67   19.00
  -5   9   3  291.77   19.00
  -5   9   3  315.27   20.60
  -5   9   3  296.37   18.80
  -5   9   3  247.88   18.40
  -5   9   3  269.07   20.70
  -5   9   3  290.57   18.70
  -5   9   3  315.47   19.30
  -3  -9   3  211.38   16.70
   3  -9  -3  195.98   14.70
  -3  -9   3  215.98   15.10
  -3  -9   3  220.08   14.10
  -3  -9   3  208.78   14.40
   3  -9  -3  189.98   13.80
  -3  -9   3  198.58   13.60
   3  -9  -3  213.88   13.90
  -3  -9   3  192.68   13.40
  -3  -9   3  185.88   13.90
  -3  -9   3  209.78   15.20
  -3  -9   3  223.08   14.60
  -3   9   3  202.28   13.60
  -3   9   3  223.28   14.40
  -3   9   3  215.08   15.90
  -3   9   3  221.98   14.20
  -3   9   3  199.08   13.70
  -3   9   3  201.68   14.00
  -3   9   3  204.18   13.90
  -3   9   3  207.68   14.30
   3   9  -3  195.88   13.70
  -3   9   3  235.78   15.70
   3   9  -3  183.08   14.80
  -3   9   3  207.58   14.70
   3   9  -3  188.78   13.70
  -1  -9   3   92.69    8.70
   1  -9  -3   78.49    6.80
   1  -9  -3   84.69    6.60
  -1  -9   3   72.19    6.20
  -1  -9   3   77.39    7.20
   1  -9  -3   90.39    8.10
  -1  -9   3   77.49    6.70
  -1  -9   3   81.69    6.60
   1  -9  -3   84.49    5.80
  -1  -9   3   79.09    5.80
   1  -9  -3   98.89    7.70
  -1  -9   3   75.19    7.20
   1   9  -3   75.69    5.90
   1   9  -3   77.49    6.60
   1   9  -3   75.49    6.90
  -1   9   3   88.29    6.80
  -1   9   3   92.19    8.30
  -1   9   3   90.59    6.30
   1   9  -3   66.59    7.10
  -1   9   3   77.59    7.10
  -1  -9  -3  262.17   18.40
  -1  -9  -3  311.97   18.50
  -1  -9  -3  276.57   19.80
   1  -9   3  238.88   17.30
   1  -9   3  262.47   17.90
   1  -9   3  257.97   17.80
  -1  -9  -3  285.27   18.60
  -1  -9  -3  281.97   18.30
   1  -9   3  293.77   19.40
   1  -9   3  270.97   18.20
   1  -9   3  262.17   17.60
   1   9   3  263.27   17.70
   1   9   3  254.97   17.50
  -1   9  -3  269.57   17.80
  -1   9  -3  268.37   18.00
   1   9   3  277.47   20.00
  -1   9  -3  269.07   18.30
   1   9   3  260.17   18.00
  -1   9  -3  256.77   17.20
  -1   9  -3  269.97   17.80
   1   9   3  269.37   18.20
  -1   9  -3  301.07   18.00
  -1   9  -3  292.27   18.40
  -1   9  -3  271.67   18.40
  -3  -9  -3  108.99    8.40
  -3  -9  -3  110.69    7.90
  -3  -9  -3  105.79    8.60
  -3  -9  -3  102.09   10.20
  -3  -9  -3  108.69    8.90
  -3  -9  -3  103.89    8.60
   3  -9   3   92.79    7.50
  -3  -9  -3  111.79    8.10
  -3  -9  -3  104.79    7.10
   3  -9   3   78.09    8.10
   3  -9   3   88.69    8.20
  -3   9  -3   95.89    7.30
  -3   9  -3   87.29    7.40
  -3   9  -3  102.09    7.50
  -3   9  -3   96.59    7.40
   3   9   3   95.79    8.20
   3   9   3  105.89    7.40
  -3   9  -3  107.29    8.10
  -3   9  -3   98.19    7.90
  -3   9  -3   98.69    7.80
  -3   9  -3   83.89    8.30
  -3   9  -3   88.29    7.40
   3   9   3   93.79   10.20
  -3   9  -3  100.79    8.60
  -5  -9  -3  241.18   16.20
  -5  -9  -3  259.37   18.80
  -5  -9  -3  247.68   18.00
  -5  -9  -3  250.67   17.40
  -5  -9  -3  241.38   17.00
  -5  -9  -3  272.07   18.50
  -5  -9  -3  261.87   18.30
  -5  -9  -3  276.37   22.00
  -5   9  -3  252.37   17.00
  -5   9  -3  212.98   16.70
  -5   9  -3  251.27   18.00
  -5   9  -3  261.57   17.00
   5   9   3  224.48   20.00
   5   9   3  241.88   16.10
  -5   9  -3  241.98   17.20
  -5   9  -3  250.87   17.30
  -5   9  -3  244.58   16.40
  -5   9  -3  254.07   16.60
   5   9   3  283.17   16.70
   5   9   3  233.58   18.40
  -5   9  -3  239.18   16.40
  -5   9  -3  236.48   16.80
  -5   9  -3  277.27   18.30
   5   9   3  262.07   17.10
  -5   9  -3  262.57   17.00
  -7  -9  -3   77.19    7.60
  -7  -9  -3   75.79    7.30
  -7  -9  -3   83.49    7.20
  -7  -9  -3   75.79    6.10
  -7  -9  -3   73.59    8.30
  -7   9  -3   69.39    5.70
  -7   9  -3   76.19    6.30
  -7   9  -3   76.89    7.00
   7   9   3   80.39    5.60
  -7   9  -3   74.59    5.70
  -7   9  -3   64.09    6.20
   7   9   3   70.89    6.50
   7   9   3   79.79    5.60
  -7   9  -3   87.69    6.60
  -7   9  -3   81.19    5.60
   7   9   3   60.89    8.50
  -7   9  -3   80.79    7.00
  -7   9  -3   60.49    6.20
  -7   9  -3   69.69    6.00
  -7   9  -3   81.19    7.80
  -7   9  -3   69.29    5.70
  -9  -9  -3   31.00    4.70
  -9  -9  -3   24.10    5.90
  -9  -9  -3   28.40    4.40
  -9  -9  -3   21.10    4.70
  -9  -9  -3   24.40    5.90
  -9  -9  -3   36.70    9.20
  -9   9  -3   35.00    3.20
  -9   9  -3   24.80    3.90
  -9   9  -3   28.90    3.50
   9   9   3   27.80    3.00
  -9   9  -3   32.70    3.90
  -9   9  -3   25.80    4.50
  -9   9  -3   26.30    3.10
   9   9   3   28.50    4.10
 -10 -10   3  121.69    8.70
  10  10  -3  118.39    8.60
 -10  10   3  129.69    9.20
  -8 -10   3   28.50    4.90
  -8 -10   3   27.10    4.50
  -8 -10   3   29.20    4.70
  -8 -10   3   22.60    4.20
  -8 -10   3   26.30    4.10
   8  10  -3   25.30    3.50
  -8  10   3   19.90    4.40
  -8  10   3   15.50    4.00
  -8  10   3   24.10    3.00
  -8  10   3   19.30    3.30
   8  10  -3   19.10    2.30
  -8  10   3   22.40    3.00
  -8  10   3   16.60    3.10
   6 -10  -3  625.94   35.40
  -6 -10   3  537.45   34.60
  -6 -10   3  568.04   36.70
  -6 -10   3  545.95   36.00
  -6 -10   3  527.85   37.30
  -6 -10   3  534.85   35.50
  -6 -10   3  552.54   35.60
  -6  10   3  545.85   35.00
   6  10  -3  529.25   35.10
  -6  10   3  534.05   37.90
  -6  10   3  598.84   35.30
  -6  10   3  526.05   34.90
  -6  10   3  564.64   36.10
  -6  10   3  543.85   35.60
   6  10  -3  473.65   34.30
  -6  10   3  568.24   35.30
  -6  10   3  622.84   37.40
  -6  10   3  491.15   35.00
   4 -10  -3  573.84   37.60
  -4 -10   3  611.74   39.20
  -4 -10   3  592.94   38.10
  -4 -10   3  596.34   38.50
  -4 -10   3  569.94   37.40
  -4 -10   3  563.54   41.00
   4 -10  -3  589.44   37.70
  -4 -10   3  594.54   38.60
  -4 -10   3  569.64   38.00
  -4 -10   3  589.04   39.40
   4 -10  -3  551.34   38.20
  -4 -10   3  588.94   37.40
  -4  10   3  636.24   38.40
  -4  10   3  553.94   37.60
  -4  10   3  670.83   39.90
  -4  10   3  582.14   37.80
  -4  10   3  598.74   38.80
   4  10  -3  575.04   37.60
   4  10  -3  567.34   37.90
  -4  10   3  608.44   37.50
  -4  10   3  601.14   40.20
  -4  10   3  601.74   38.20
  -4  10   3  623.54   38.10
  -2 -10   3  443.76   29.70
   2 -10  -3  446.26   30.10
  -2 -10   3  430.76   30.50
  -2 -10   3  463.05   30.20
  -2 -10   3  470.25   30.20
  -2 -10   3  446.96   32.20
   2 -10  -3  434.76   29.80
  -2 -10   3  418.36   29.10
   2 -10  -3  479.65   31.00
  -2 -10   3  465.35   29.30
   2 -10  -3  508.65   29.90
  -2 -10   3  471.85   31.00
   2 -10  -3  467.15   29.10
  -2  10   3  478.85   29.60
   2  10  -3  467.25   29.50
  -2  10   3  477.75   30.00
  -2  10   3  406.76   29.20
  -2  10   3  454.65   29.40
  -2  10   3  526.05   31.60
  -2  10   3  492.45   31.80
  -2  10   3  464.85   28.90
   2  10  -3  412.16   29.20
   2  10  -3  461.35   30.00
  -2  10   3  456.35   29.60
  -2  10   3  473.35   29.90
   0 -10   3    0.60    1.80
   0 -10   3    1.80    2.90
   0 -10  -3    1.40    2.10
   0 -10   3   -1.90    3.00
   0 -10  -3    1.70    1.50
   0 -10   3    2.20    2.40
   0 -10   3    1.80    2.20
   0 -10   3    0.10    1.60
   0 -10  -3    0.40    3.20
   0 -10   3    1.90    1.30
   0 -10  -3    1.40    2.10
   0 -10  -3   -0.30    2.10
   0  10  -3    1.00    1.30
   0  10   3    0.90    1.30
   0  10  -3    4.70    2.10
   0  10   3    3.30    1.90
   0  10   3    2.60    2.00
   0  10  -3    3.70    1.90
   0  10  -3    2.20    2.30
   0  10   3    1.00    3.10
   0  10   3    2.30    1.70
   0  10  -3    3.20    2.20
   0  10  -3    1.90    1.50
  -2 -10  -3  454.25   29.00
  -2 -10  -3  433.66   28.80
   2 -10   3  435.96   28.30
   2 -10   3  425.36   28.40
  -2 -10  -3  454.95   30.50
  -2 -10  -3  461.05   29.30
  -2 -10  -3  439.56   28.40
   2 -10   3  375.66   28.30
   2 -10   3  425.96   29.30
   2 -10   3  430.56   27.90
  -2 -10  -3  458.85   28.30
   2 -10   3  398.46   28.20
  -2 -10  -3  469.15   28.90
  -2 -10  -3  458.05   27.60
  -2  10  -3  425.26   27.70
   2  10   3  405.26   28.30
  -2  10  -3  457.95   28.20
  -2  10  -3  461.15   27.90
  -2  10  -3  440.96   28.50
   2  10   3  436.46   30.50
   2  10   3  414.26   28.10
   2  10   3  413.76   27.60
  -2  10  -3  439.96   28.10
   2  10   3  417.96   27.80
  -2  10  -3  423.16   28.20
  -2  10  -3  432.56   28.00
  -4 -10  -3  289.17   22.60
  -4 -10  -3  288.27   20.30
  -4 -10  -3  312.17   18.40
  -4 -10  -3  298.27   19.90
  -4 -10  -3  299.07   20.20
  -4 -10  -3  299.07   19.30
  -4 -10  -3  320.47   20.80
  -4 -10  -3  305.17   19.30
  -4  10  -3  281.77   19.30
  -4  10  -3  282.37   19.90
  -4  10  -3  280.57   18.70
   4  10   3  279.27   18.20
  -4  10  -3  247.38   18.30
  -4  10  -3  287.07   19.00
   4  10   3  280.07   18.80
   4  10   3  277.97   19.70
   4  10   3  280.37   18.70
  -4  10  -3  274.97   19.30
  -4  10  -3  278.47   19.10
  -4  10  -3  271.57   18.90
   4  10   3  237.38   21.50
  -6 -10  -3  561.14   36.30
  -6 -10  -3  582.34   35.80
  -6 -10  -3  533.65   35.10
  -6 -10  -3  573.34   34.80
  -6 -10  -3  530.55   35.30
   6  10   3  518.75   33.40
  -6  10  -3  497.45   33.60
   6  10   3  471.85   34.90
  -6  10  -3  472.25   33.60
  -6  10  -3  533.55   33.90
  -6  10  -3  534.75   34.30
  -6  10  -3  520.85   34.40
  -6  10  -3  529.95   34.40
  -6  10  -3  530.25   33.90
   6  10   3  552.34   34.20
  -6  10  -3  538.85   34.70
  -6  10  -3  600.14   35.40
  -6  10  -3  488.85   34.00
  -6  10  -3  565.54   34.30
  -8 -10  -3   43.90    5.30
  -8 -10  -3   45.00    6.10
  -8 -10  -3   47.30    6.40
  -8 -10  -3   36.80    5.40
  -8  10  -3   44.30    4.40
  -8  10  -3   45.90    4.70
   8  10   3   40.50    3.50
  -8  10  -3   35.20    4.80
  -8  10  -3   39.00    5.30
  -9 -11   3   74.19    5.50
  -9 -11   3   60.29    6.50
   9  11  -3   61.19    6.30
  -9  11   3   71.39    5.00
  -9  11   3   70.89    5.90
  -7 -11   3    1.50    2.70
  -7 -11   3    5.40    3.90
   7 -11  -3    0.90    3.70
  -7 -11   3    2.00    3.10
  -7  11   3    8.00    2.50
  -7  11   3    3.60    2.70
  -7  11   3    2.50    3.10
   7  11  -3    5.60    2.00
   7  11  -3    3.20    2.10
  -7  11   3    6.40    1.90
   5 -11  -3   36.10    4.40
  -5 -11   3   43.80    5.50
   5 -11  -3   26.80    5.50
  -5 -11   3   45.80    5.50
  -5 -11   3   76.69   15.30
  -5 -11   3   40.20    3.80
  -5 -11   3   42.10    6.10
  -5 -11   3   50.39    7.70
   5 -11  -3   30.70    5.80
  -5 -11   3   48.50    5.10
  -5  11   3   39.40    4.00
  -5  11   3   43.60    7.70
  -5  11   3   40.90    5.50
  -5  11   3   35.50    5.10
   5  11  -3   36.50    4.30
  -5  11   3   42.60    4.80
  -5  11   3   38.50    4.70
   3 -11  -3   22.80    4.50
  -3 -11   3   21.40    3.80
   3 -11  -3   19.60    4.00
  -3 -11   3   20.70    4.90
  -3 -11   3   25.40    4.70
  -3 -11   3   21.60    4.20
  -3 -11   3   25.50    3.10
  -3 -11   3   29.40    8.30
  -3 -11   3   25.70    3.30
   3 -11  -3   26.90    4.30
  -3  11   3   24.10    5.70
  -3  11   3   26.10    4.20
   3  11  -3   19.60    3.30
  -3  11   3   21.30    2.90
  -3  11   3   26.40    4.10
  -3  11   3   23.20    3.30
   3  11  -3   19.80    3.70
  -3  11   3   23.20    4.00
  -3  11   3   21.80    4.60
   3  11  -3   20.30    3.10
   1 -11  -3   44.40    3.90
  -1 -11   3   28.60    4.20
  -1 -11   3   27.30    4.70
  -1 -11   3   31.10    3.30
   1 -11  -3   46.20    5.20
   1 -11  -3   42.30    5.00
  -1 -11   3   39.50    7.20
  -1 -11   3   28.30    3.70
   1 -11  -3   36.70    4.80
   1 -11  -3   40.80    6.80
  -1 -11   3   31.60    5.50
  -1 -11   3   33.70    5.30
  -1 -11   3   25.40    4.50
  -1  11   3   42.30    5.20
  -1  11   3   50.79    6.50
   1  11  -3   33.60    4.10
   1  11  -3   32.60    3.60
  -1  11   3   39.80    4.20
  -1  11   3   44.80    4.00
  -1  11   3   46.70    4.50
   1  11  -3   43.20    4.40
   1 -11   3  180.68   15.20
  -1 -11  -3  180.38   15.50
   1 -11   3  188.18   13.30
   1 -11   3  168.78   12.40
  -1 -11  -3  204.68   14.00
   1 -11   3  172.78   13.60
   1 -11   3  187.98   13.70
  -1 -11  -3  200.28   14.40
  -1 -11  -3  197.68   14.10
  -1 -11  -3  198.48   13.30
  -1 -11  -3  180.28   13.70
   1 -11   3  187.18   13.30
  -1 -11  -3  191.78   12.60
   1 -11   3  174.08   12.70
  -1 -11  -3  198.08   13.60
  -1  11  -3  178.08   13.40
   1  11   3  177.68   12.40
  -1  11  -3  196.68   12.90
  -1  11  -3  179.68   13.00
  -1  11  -3  189.28   12.90
   1  11   3  205.98   14.40
  -1  11  -3  192.68   13.60
  -1  11  -3  192.18   13.30
   1  11   3  184.88   15.30
   3 -11   3    6.20    2.20
  -3 -11  -3   -1.90    6.30
  -3 -11  -3    5.10    3.10
  -3 -11  -3    5.90    3.90
  -3 -11  -3    0.20    2.90
  -3 -11  -3    2.40    2.00
   3 -11   3    0.80    2.30
  -3 -11  -3    5.10    2.90
   3 -11   3    3.70    2.60
  -3 -11  -3    2.80    2.90
  -3  11  -3    2.90    2.20
  -3  11  -3    2.80    2.10
   3  11   3    2.80    2.10
   3  11   3    5.40    2.20
   3  11   3    7.10    2.30
   3  11   3    0.60    4.70
  -3  11  -3    1.10    1.50
  -3  11  -3    1.30    2.50
  -3  11  -3    9.10    2.90
  -3  11  -3    1.70    2.20
  -3  11  -3    4.00    2.30
  -3  11  -3    1.40    2.30
  -5 -11  -3   44.70    6.60
  -5 -11  -3   57.19    8.90
  -5 -11  -3   46.20    6.50
  -5 -11  -3   50.49    5.50
  -5 -11  -3   38.00    5.40
  -5 -11  -3   39.20    5.10
  -5  11  -3   37.80    4.90
  -5  11  -3   42.90    4.70
  -5  11  -3   44.00    4.60
  -5  11  -3   39.00    3.60
  -5  11  -3   34.30    4.30
   5  11   3   35.10    4.30
  -5  11  -3   33.20    4.90
  -5  11  -3   31.90    3.40
   5  11   3   24.00    7.30
  -5  11  -3   37.60    4.10
  -7 -11  -3    9.90    3.30
  -7 -11  -3   14.00    5.10
  -7 -11  -3   11.20    3.80
  -7 -11  -3    8.30    3.70
  -7  11  -3    5.40    2.60
  -7  11  -3    8.60    2.60
  -7  11  -3   14.30    2.40
  -7  11  -3   10.50    3.50
   7  11   3    9.00    2.50
  -7  11  -3    6.70    1.90
  -7  11  -3   10.20    2.50
  -9 -11  -3   26.70    4.40
   9  11   3   24.50    3.00
  -8 -12   3   31.30    6.70
   8  12  -3   39.90    3.80
   6 -12  -3    4.20    2.60
  -6 -12   3    1.00    3.00
  -6 -12   3   -0.60    2.40
  -6 -12   3   -1.40    5.30
  -6  12   3   -0.10    1.50
   6  12  -3   -0.60    1.80
  -6  12   3    6.80    2.60
  -6  12   3    0.90    2.50
  -6  12   3    1.10    3.00
  -6  12   3    0.50    2.30
   6  12  -3    1.90    1.90
  -4 -12   3   38.80    5.60
  -4 -12   3   26.20    3.60
  -4 -12   3   42.50    6.60
  -4 -12   3   23.60    9.00
  -4 -12   3   32.40    5.00
   4  12  -3   26.70    3.70
   4  12  -3   31.60    3.80
   4  12  -3   34.00    3.90
  -4  12   3   41.00    5.20
  -4  12   3   23.90    6.40
  -2 -12   3   -3.20    2.20
  -2 -12   3    3.40    3.20
  -2 -12   3    1.20    1.60
  -2 -12   3   -1.60    3.40
   2 -12  -3    3.40    2.70
  -2 -12   3    0.40    2.70
   2 -12  -3    4.20    1.70
   2 -12  -3   -2.10    2.30
  -2 -12   3    0.00    2.50
  -2 -12   3    3.00    4.30
  -2 -12   3   -2.40    1.70
   2 -12  -3    1.80    3.70
   2 -12  -3    0.40    2.90
  -2  12   3    1.40    2.20
   2  12  -3    1.10    2.20
   2  12  -3    0.10    1.70
   2  12  -3    1.20    1.70
  -2  12   3    1.20    2.30
  -2  12   3    3.00    2.40
  -2  12   3    1.50    2.50
   2  12  -3   -1.30    1.80
  -2  12   3    2.00    1.60
  -2  12   3    3.90    5.10
   0 -12   3   58.99    5.00
   0 -12   3   46.90    6.50
   0 -12   3   56.89    4.70
   0 -12   3   51.69    6.20
   0 -12   3   52.89    8.60
   0 -12   3   63.49    5.80
   0  12  -3   65.89    5.70
   0  12  -3   51.29    5.10
   0  12  -3   62.49    5.50
   0  12   3   66.39    9.50
   0  12  -3   66.09    4.60
   0  12  -3   61.69    6.10
  -2 -12  -3   -0.90    1.90
   2 -12   3    0.40    2.20
   2 -12   3    3.20    1.50
  -2 -12  -3   -0.50    3.70
   2 -12   3    0.30    2.50
  -2 -12  -3    5.20    3.40
  -2 -12  -3   -1.40    2.30
   2 -12   3    3.40    2.20
   2 -12   3    2.00    2.80
   2 -12   3    1.80    3.80
  -2 -12  -3    3.60    2.90
  -2 -12  -3    1.30    4.80
  -2 -12  -3    0.40    2.80
  -2 -12  -3    1.70    2.40
  -2  12  -3    2.20    2.00
   2  12   3    3.00    2.20
  -2  12  -3    1.80    2.00
  -2  12  -3    0.10    2.30
   2  12   3    3.40    5.00
   2  12   3    1.20    1.60
   2  12   3   -1.10    1.90
  -2  12  -3    1.20    1.80
  -2  12  -3    2.00    2.50
   4 -12   3   49.70    5.20
  -4 -12  -3   67.09    7.50
  -4 -12  -3   59.49    5.80
  -4 -12  -3   53.49    6.20
  -4 -12  -3   56.19    8.50
  -4 -12  -3   60.99    6.90
  -4  12  -3   53.79    5.30
  -4  12  -3   48.80    5.20
  -4  12  -3   55.19    5.70
  -4  12  -3   56.89    4.60
  -4  12  -3   55.99    5.60
  -4  12  -3   48.20    5.00
   4  12   3   51.69    4.80
  -4  12  -3   56.39    5.60
   4  12   3   51.29    4.90
  -6 -12  -3   36.80    5.70
  -6 -12  -3   31.40    4.90
  -6 -12  -3   31.00    4.80
  -6 -12  -3   18.50    7.30
  -6  12  -3   33.00    4.40
  -6  12  -3   28.20    4.20
   6  12   3   23.90    3.70
  -6  12  -3   31.20    4.00
  -6  12  -3   28.40    3.20
   8  12   3   84.49    6.30
  -7  13   3   69.09    6.60
  -7  13   3   78.19    5.70
  -7  13   3   83.89    5.80
  -5 -13   3  289.97   18.60
  -5 -13   3  283.47   19.40
  -5 -13   3  253.87   17.60
  -5 -13   3  272.47   19.00
   5 -13  -3  251.27   17.40
   5 -13  -3  255.47   17.90
  -5 -13   3  273.77   18.70
   5  13  -3  290.37   18.00
  -5  13   3  274.27   18.00
  -5  13   3  262.37   18.10
  -5  13   3  256.17   17.60
  -5  13   3  299.17   19.30
   5  13  -3  287.97   17.90
  -5  13   3  270.07   18.40
  -3 -13   3   48.60    4.80
   3 -13  -3   71.79    7.90
  -3 -13   3   40.60    5.90
  -3 -13   3   59.69   11.30
  -3 -13   3   54.19    7.40
  -3 -13   3   47.80    5.40
   3 -13  -3   68.19    6.40
  -3 -13   3   52.49    5.80
  -3  13   3   65.09    6.30
  -3  13   3   60.39    4.40
  -3  13   3   66.89    5.60
  -3  13   3   50.39   14.30
   3  13  -3   44.90    4.80
   3  13  -3   47.70    5.00
   3  13  -3   46.10    4.90
  -1 -13   3  525.65   38.90
  -1 -13   3  554.84   35.40
  -1 -13   3  536.25   36.00
   1 -13  -3  565.64   36.20
   1 -13  -3  558.44   36.50
  -1 -13   3  576.74   37.40
   1 -13  -3  585.34   37.30
   1 -13  -3  537.05   37.80
  -1 -13   3  534.75   36.40
   1 -13  -3  527.25   36.60
  -1 -13   3  596.44   36.80
  -1 -13   3  517.15   36.70
  -1 -13   3  579.94   35.70
   1 -13  -3  582.94   35.50
   1 -13  -3  572.14   36.80
   1 -13  -3  591.44   36.40
   1  13  -3  537.85   36.20
   1  13  -3  584.94   35.30
  -1  13   3  572.34   36.20
  -1  13   3  553.24   36.00
   1  13  -3  555.34   35.70
  -1  13   3  513.05   38.40
  -1  13   3  563.94   35.90
  -1  13   3  601.64   37.50
   1  13  -3  578.34   36.00
  -1 -13  -3  166.08   11.20
   1 -13   3  132.19   10.40
  -1 -13  -3  164.08   11.20
  -1 -13  -3  161.18   13.40
   1 -13   3  110.99   10.70
   1 -13   3  122.59   10.00
   1 -13   3  114.89   12.10
  -1 -13  -3  165.38   11.50
   1 -13   3  113.69    9.60
   1 -13   3  139.89    9.40
  -1  13  -3  134.59    9.50
  -1  13  -3  138.29    9.80
   1  13   3  111.29   13.10
  -1  13  -3  123.49   10.20
  -1  13  -3  133.59   10.00
  -3 -13  -3   62.89    6.50
  -3 -13  -3   69.19    6.30
   3 -13   3   61.39    6.00
  -3 -13  -3   77.49    5.50
   3 -13   3   55.29   10.10
  -3 -13  -3   72.99    7.80
  -3 -13  -3   58.39    7.30
  -3 -13  -3   72.79    8.50
  -3 -13  -3   74.09    7.20
  -3  13  -3   69.19    6.30
  -3  13  -3   67.09    6.40
  -3  13  -3   62.99    5.40
  -3  13  -3   67.19    6.40
   3  13   3   62.29    5.60
   3  13   3   68.09    5.50
  -3  13  -3   66.89    5.80
  -5 -13  -3   48.40    5.20
  -5 -13  -3   36.90    5.60
  -5  13  -3   35.80    4.30
   5  13   3   41.30    4.00
  -5  13  -3   23.90    4.60
  -5  13  -3   31.40    3.60
  -5  13  -3   35.60    4.60
  -5  13  -3   36.00    3.20
   6  14  -3  608.74   38.10
   6  14  -3  619.04   37.70
  -6  14   3  597.04   37.50
  -6  14   3  577.44   38.10
  -6  14   3  592.74   37.70
  -4 -14   3   -1.60    1.90
  -4 -14   3    0.50    3.80
   4 -14  -3    2.40    2.40
   4 -14  -3   -0.20    1.80
  -4 -14   3    4.20    3.40
   4 -14  -3    3.70    5.00
   4 -14  -3    2.10    2.40
  -4 -14   3    0.80    2.70
  -4 -14   3   -1.20    2.40
  -4  14   3   -2.60    2.30
  -4  14   3   -1.20    1.30
   4  14  -3   -0.30    2.20
  -4  14   3    1.50    2.20
  -4  14   3    4.30    3.10
   4  14  -3   -0.80    1.80
  -4  14   3    1.20    2.50
   2 -14  -3  867.71   49.50
  -2 -14   3  743.83   49.40
   2 -14  -3  872.21   51.79
  -2 -14   3  675.83   49.50
   2 -14  -3  841.22   48.30
  -2 -14   3  690.13   49.70
   2 -14  -3  781.02   48.90
  -2 -14   3  775.82   49.30
  -2 -14   3  638.34   50.19
  -2  14   3  741.33   49.60
  -2  14   3  792.72   48.70
   2  14  -3  735.13   48.80
   2  14  -3  802.92   48.20
   2  14  -3  778.52   48.70
  -2  14   3  782.62   48.90
  -2  14   3  782.22   48.90
   0 -14  -3   34.00    5.00
   0 -14  -3   30.10    4.80
   0 -14   3   31.10    3.70
   0 -14  -3   34.00    4.50
   0 -14   3   46.70    6.50
   0 -14   3   33.40    5.10
   0 -14  -3   38.30    3.80
   0 -14  -3   43.50    5.70
   0  14  -3   34.20    3.80
   0  14   3   34.10    4.20
   0  14   3   38.70    4.30
   0  14   3   36.30    4.20
   0  14  -3   34.70    4.30
   0  14  -3   29.60    4.40
   0  14   3   33.50    4.70
   0  14  -3   32.70    3.90
   2 -14   3  910.71   54.69
   2 -14   3  911.01   55.49
  -2 -14  -3  869.91   55.39
  -2 -14  -3  850.01   55.39
  -2 -14  -3  918.51   56.79
  -2 -14  -3  874.61   56.79
  -2 -14  -3  841.22   55.99
  -2  14  -3  894.11   55.29
   2  14   3  816.92   54.79
  -2  14  -3  871.11   54.89
   2  14   3  849.22   54.49
  -2  14  -3  838.32   55.39
  -2  14  -3  927.81   54.79
   2  14   3  890.91   54.89
  -2  14  -3  803.22   55.09
   2  14   3  884.81   54.99
  -4 -14  -3    4.80    3.20
  -4 -14  -3    2.90    1.80
  -4 -14  -3    1.30    3.00
   4 -14   3    9.00    2.70
  -4 -14  -3    5.10    2.70
  -4 -14  -3    3.20    3.70
  -4  14  -3    4.00    1.80
  -4  14  -3    1.10    2.90
   4  14   3    5.40    2.10
  -4  14  -3    4.80    2.30
  -4  14  -3    2.80    1.60
  -4  14  -3    5.00    2.60
   4  14   3    3.20    1.90
  -6  14  -3  579.34   39.20
   6  14   3  643.74   38.80
  -6  14  -3  627.64   39.00
  -5  15   3  224.98   15.40
   5  15  -3  236.38   14.90
  -5  15   3  224.98   15.00
   5  15  -3  238.48   15.40
  -3 -15   3   15.30    2.70
  -3 -15   3   19.50    4.40
   3 -15  -3   22.40    3.40
  -3 -15   3   17.70    3.50
  -3 -15   3   12.30    3.00
   3 -15  -3   22.00    3.60
  -3  15   3   19.70    3.10
   3  15  -3   13.60    3.50
   3  15  -3   15.80    2.70
   3  15  -3   17.80    3.10
  -3  15   3   15.10    4.50
  -3  15   3   21.70    3.70
  -1 -15   3  134.99   11.20
   1 -15  -3  147.89   11.30
   1 -15  -3  153.88   11.80
  -1 -15   3  136.19    9.90
  -1 -15   3  133.29   12.00
   1 -15  -3  142.59   10.90
  -1 -15   3  136.19   10.90
   1 -15  -3  144.09   10.50
   1 -15  -3  149.09    9.80
   1  15  -3  133.49   10.30
   1  15  -3  156.88   10.20
  -1  15   3  148.39   10.30
  -1  15   3  154.38   10.30
  -1  15   3  145.79   10.40
   1  15  -3  148.59   10.40
   1 -15   3   57.99    5.20
  -1 -15  -3   78.09    6.80
  -1 -15  -3   81.89    6.30
  -1 -15  -3   69.69    7.50
   1 -15   3   59.69    6.10
  -1 -15  -3   72.69    6.70
  -1  15  -3   58.59    5.90
   1  15   3   71.99    5.70
  -1  15  -3   60.89    5.80
   1  15   3   73.89    5.80
  -1  15  -3   70.79    5.50
  -1  15  -3   63.79    6.00
  -3 -15  -3   66.49    6.60
   3 -15   3   67.19    5.00
  -3 -15  -3   60.29    5.10
  -3 -15  -3   68.09    6.20
   3 -15   3   70.99    5.90
  -3 -15  -3   58.79    6.70
  -3 -15  -3   81.19    8.00
  -3  15  -3   68.19    6.10
  -3  15  -3   61.99    5.00
   3  15   3   60.99    5.20
  -3  15  -3   73.59    7.10
   3  15   3   66.29    5.60
  -3  15  -3   79.09    5.90
  -5  15  -3  165.98   11.20
   5  15   3  178.28   11.00
   5  15   3  163.78   10.90
  -5  15  -3  155.18   12.10
   4  16  -3   63.39    4.80
  -2 -16   3   34.20    3.70
  -2 -16   3   34.60    4.10
  -2  16   3   37.00    3.70
  -2  16   3   44.80    4.10
   2  16  -3   34.00    3.70
   2  16  -3   35.90    3.40
   0 -16   3   62.79    6.40
   0  16  -3   75.89    6.20
   0  16  -3   70.79    5.50
   0  16   3   93.39    6.00
   0  16  -3   73.69    6.00
  -2 -16  -3   18.10    2.50
   2 -16   3   18.50    2.10
   2  16   3   17.90    2.70
   2  16   3   18.60    2.90
  -2  16  -3   16.20    3.00
  -2  16  -3   16.70    3.10
  12   0  -4  293.77   21.00
  12   0  -4  326.57   20.30
  12   0  -4  351.46   20.40
  12   0  -4  319.07   20.50
 -12   0   4  332.17   20.60
 -12   0   4  323.27   20.90
 -12   0   4  301.37   20.60
 -12   0   4  302.17   20.30
 -10   0   4    1.30    2.50
  10   0  -4   -1.20    4.20
  10   0  -4    0.90    1.80
 -10   0   4    0.80    3.00
  10   0  -4   -0.10    1.80
  10   0  -4    4.70    1.90
  10   0  -4    8.40    5.70
 -10   0   4    2.80    3.10
 -10   0   4    2.30    2.60
 -10   0   4    3.10    2.90
 -10   0   4   -1.70    3.40
 -10   0   4    3.60    2.30
  10   0  -4    4.00    2.80
 -10   0   4    1.60    3.30
  -8   0   4 1926.51  140.39
   8   0  -4 2380.56  141.99
   8   0  -4 2206.48  143.19
  -8   0   4 2277.77  143.29
  -8   0   4 2375.16  141.69
   8   0  -4 2219.68  140.49
  -8   0   4 2304.77  141.99
  -8   0   4 2439.26  141.49
  -8   0   4 2251.77  141.49
   8   0  -4 2174.18  140.49
  -8   0   4 2344.57  143.39
   8   0  -4 2240.78  140.99
   6   0  -4  135.49   11.00
   6   0  -4  129.49    9.40
   6   0  -4  140.89   10.20
  -6   0   4  130.49    9.80
  -6   0   4  156.68   10.70
  -6   0   4  154.38   10.20
   6   0  -4  119.69    9.00
   4   0  -4 5426.76  355.46
  -4   0   4 5355.76  355.66
  -4   0   4 6450.25  356.86
  -2   0   4  769.52   44.20
  -2   0   4  662.93   43.80
  -2   0   4  652.93   43.70
  -2   0   4  720.93   44.00
   2   0  -4  763.42   44.20
  -2   0   4  664.23   44.10
   2   0  -4  666.23   43.80
   0   0  -4 1286.17   83.19
   0   0   4 1388.26   83.09
   0   0   4 1477.75   83.39
   0   0   4 1319.57   83.19
   0   0  -4 1211.18   83.19
   2   0   4 1645.04  100.69
  -2   0  -4 1690.93  100.49
  -2   0  -4 1369.06  100.59
   2   0   4 1775.42  100.89
  -4   0  -4 5260.67  337.37
   4   0   4 5621.14  336.97
  -6   0  -4   44.10    4.90
  -6   0  -4   57.99    4.80
  -6   0  -4   52.19    5.20
   6   0   4   60.59    4.20
  -6   0  -4   61.89    5.30
  -6   0  -4   68.69    6.10
   6   0   4   50.99    6.10
  -6   0  -4   54.19    5.40
   6   0   4   57.99    4.70
  -6   0  -4   48.40    4.60
   8   0   4  772.52   49.30
  -8   0  -4  715.33   50.09
   8   0   4  770.52   49.40
  -8   0  -4  846.62   49.99
  -8   0  -4  809.22   51.49
  -8   0  -4  741.73   49.70
  -8   0  -4  766.22   50.69
   8   0   4  821.02   51.79
   8   0   4  789.72   49.90
  -8   0  -4  802.02   49.90
   8   0   4  811.02   49.40
   8   0   4  774.12   50.49
  -8   0  -4  806.12   49.70
 -10   0  -4  329.27   26.20
 -10   0  -4  418.76   25.50
  10   0   4  396.36   25.10
 -10   0  -4  399.36   25.80
 -10   0  -4  362.06   26.90
 -10   0  -4  438.86   25.60
 -10   0  -4  408.26   25.40
  10   0   4  395.46   24.90
  10   0   4  377.26   25.00
  10   0   4  410.36   26.40
 -10   0  -4  370.86   25.50
 -12   0  -4  548.95   35.10
 -12   0  -4  525.05   35.50
 -12   0  -4  572.14   34.90
 -12   0  -4  546.85   34.90
  12   0   4  589.34   34.70
  12   0   4  546.95   34.80
 -11  -1   4   20.80    4.50
  11  -1  -4   20.80    3.30
 -11  -1   4   27.40    4.10
 -11  -1   4   23.10    4.00
  11  -1  -4   23.30    3.10
 -11  -1   4   26.70    3.40
 -11  -1   4   25.10    4.80
 -11  -1   4   28.80    3.80
 -11  -1   4   23.40    3.60
 -11   1   4   22.30    4.10
 -11   1   4   22.30    3.90
 -11   1   4   22.30    4.80
 -11   1   4   21.10    3.40
 -11   1   4   17.90    3.80
  11   1  -4   20.80    3.10
  11   1  -4   21.50    2.80
 -11   1   4   26.20    3.70
  11   1  -4   20.00    3.40
 -11   1   4   18.70    4.20
  -9  -1   4  260.37   20.60
  -9  -1   4  288.17   19.60
   9  -1  -4  270.47   18.50
   9  -1  -4  293.47   20.30
  -9  -1   4  318.87   19.80
   9  -1  -4  292.97   19.30
   9  -1  -4  282.27   18.60
  -9  -1   4  298.17   19.50
   9  -1  -4  265.87   21.70
  -9  -1   4  295.47   20.70
  -9  -1   4  274.07   19.70
  -9  -1   4  285.37   19.10
  -9  -1   4  288.67   20.60
  -9   1   4  283.87   20.00
  -9   1   4  329.67   19.80
   9   1  -4  304.17   20.60
   9   1  -4  292.17   18.60
  -9   1   4  259.77   18.50
  -9   1   4  273.47   19.20
  -9   1   4  293.97   19.00
   9   1  -4  282.27   18.60
  -9   1   4  283.87   19.50
   9   1  -4  275.57   19.30
   9   1  -4  296.17   18.60
  -9   1   4  297.57   19.90
  -9   1   4  281.77   20.90
  -9   1   4  266.27   19.30
  -7  -1   4  118.29    9.90
   7  -1  -4  109.49   10.30
   7  -1  -4  113.19    9.10
   7  -1  -4  104.69    8.20
  -7  -1   4  106.79    8.60
  -7  -1   4   96.09    8.20
  -7  -1   4  118.29    9.00
  -7  -1   4  116.89    9.70
  -7   1   4  111.09    8.60
  -7   1   4  130.19    9.90
  -7   1   4  122.19    9.00
   7   1  -4  111.59    9.30
   7   1  -4  103.09   10.80
  -7   1   4  100.59    8.30
   7   1  -4  101.39    7.60
  -7   1   4  129.09    8.20
  -7   1   4   94.29    7.60
   7   1  -4  113.19    8.40
  -7   1   4  109.09    9.70
   7   1  -4  101.29    7.60
  -7   1   4  114.59    8.90
   5  -1  -4 1434.76   87.19
  -5  -1   4 1301.87   86.59
   5  -1  -4 1231.58   86.49
  -5  -1   4 1392.36   86.49
  -5  -1   4 1265.97   86.49
  -5  -1   4 1520.95   86.79
   5  -1  -4 1414.26   86.69
  -5  -1   4 1434.26   86.99
  -5   1   4 1346.47   86.59
   5   1  -4 1359.66   86.79
   5   1  -4 1336.47   86.29
  -5   1   4 1497.35   86.69
   5   1  -4 1306.57   86.09
  -5   1   4 1483.35   86.99
   5   1  -4 1343.77   87.49
  -5   1   4 1495.75   87.89
   3  -1  -4 2183.48  133.79
  -3  -1   4 2231.08  133.79
   3  -1  -4 2028.40  133.49
  -3  -1   4 2072.59  133.89
  -3  -1   4 2049.40  133.99
   3  -1  -4 2363.76  134.09
  -3  -1   4 2495.65  134.49
  -3  -1   4 2033.80  133.69
  -3  -1   4 2037.40  133.59
  -3  -1   4 2000.70  134.29
  -3  -1   4 2001.60  133.79
  -3   1   4 2248.97  133.99
  -3   1   4 2099.59  133.69
   3   1  -4 1939.21  133.49
  -3   1   4 2078.69  133.79
  -3   1   4 2406.96  134.49
   3   1  -4 2247.98  133.99
  -3   1   4 2243.68  133.79
   3   1  -4 2161.88  134.39
   1  -1  -4 1729.13  105.39
  -1  -1   4 1770.62  105.19
   1  -1  -4 1682.63  105.19
  -1  -1   4 1703.63  105.59
  -1   1   4 1669.53  105.49
  -1   1   4 1728.93  105.49
   1   1  -4 1637.44  105.29
   1   1  -4 1665.53  105.69
  -1   1   4 1662.93  105.39
  -1  -1  -4  892.61   55.49
   1  -1   4  949.40   55.49
   1  -1   4  888.01   55.29
  -1  -1  -4  834.92   55.29
  -1   1  -4  792.62   55.19
   1   1   4  920.91   55.69
   1   1   4  938.71   55.39
  -3  -1  -4 1745.73  111.49
  -3  -1  -4 1717.33  111.89
   3  -1   4 1990.90  111.99
  -3  -1  -4 1629.44  111.89
   3   1   4 1859.11  111.79
   3   1   4 2015.40  112.29
  -3   1  -4 1625.14  111.69
   3   1   4 1792.42  111.49
   5  -1   4  653.03   38.20
   5  -1   4  660.83   39.10
  -5  -1  -4  566.24   38.20
  -5  -1  -4  559.14   38.80
  -5  -1  -4  556.04   38.40
  -5  -1  -4  653.63   39.10
   5   1   4  638.04   38.30
   5   1   4  610.34   38.00
  -5   1  -4  626.84   38.70
  -5   1  -4  526.55   38.30
   5   1   4  640.64   39.40
   7  -1   4  152.58   10.10
  -7  -1  -4  144.39   11.00
  -7  -1  -4  154.18   12.20
  -7  -1  -4  147.69   10.20
   7  -1   4  137.89    9.70
  -7  -1  -4  140.39   10.20
  -7  -1  -4  139.29   11.00
   7  -1   4  145.99   11.70
  -7  -1  -4  140.59   10.20
  -7  -1  -4  142.09   10.60
  -7  -1  -4  141.69   10.80
  -7  -1  -4  130.69   10.20
  -7   1  -4  137.69   10.50
  -7   1  -4  161.68   11.60
   7   1   4  138.79    9.70
  -7   1  -4  144.59   10.00
   7   1   4  144.29    9.70
  -7   1  -4  154.38   10.20
  -7   1  -4  144.29   10.20
   7   1   4  145.79    9.60
  -7   1  -4  142.99   11.10
   7   1   4  141.79   12.00
   7   1   4  148.19   10.20
   7   1   4  137.99   11.00
  -7   1  -4  165.48   12.10
  -7   1  -4  138.89   10.20
  -7   1  -4  126.69   10.30
   9  -1   4  107.99    8.30
  -9  -1  -4  112.29    8.20
   9  -1   4  103.99    7.50
   9  -1   4  112.39    9.20
  -9  -1  -4  105.89    8.00
  -9  -1  -4  108.79    8.90
  -9  -1  -4  108.29    8.00
   9  -1   4  102.29   10.70
  -9  -1  -4   96.29    9.10
  -9  -1  -4   91.49    8.20
   9  -1   4  104.79    7.50
  -9  -1  -4  107.09   10.20
  -9   1  -4   94.19    7.70
   9   1   4   95.19    7.50
  -9   1  -4   96.69    8.40
   9   1   4   95.99    7.50
   9   1   4  118.19    9.10
  -9   1  -4  102.39   10.00
  -9   1  -4   99.49    8.20
   9   1   4  113.39    7.40
  -9   1  -4  105.29    8.10
  -9   1  -4  104.49    8.00
   9   1   4   95.19   10.80
   9   1   4  109.59    8.50
  -9   1  -4  106.99    8.10
 -11  -1  -4  331.77   22.80
 -11  -1  -4  355.16   24.20
 -11  -1  -4  363.76   22.90
 -11  -1  -4  301.57   22.70
  11  -1   4  366.86   22.60
  11  -1   4  387.16   22.50
 -11  -1  -4  307.57   23.50
 -11  -1  -4  331.37   23.00
  11  -1   4  385.36   23.30
  11  -1   4  367.56   22.60
 -11   1  -4  338.97   23.20
 -11   1  -4  373.86   22.90
  11   1   4  381.06   22.50
  11   1   4  362.46   24.30
  11   1   4  379.96   23.40
 -11   1  -4  309.47   23.70
 -11   1  -4  338.47   24.00
  11   1   4  408.56   23.50
 -11   1  -4  308.37   22.50
 -11   1  -4  353.96   22.90
  11   1   4  384.66   22.70
  12  -2  -4   27.60    2.90
 -12  -2   4   20.80    2.80
 -12  -2   4   26.60    3.30
 -12  -2   4   19.40    3.00
  12  -2  -4   34.90    3.90
  12  -2  -4   26.40    2.90
 -12  -2   4   25.50    3.40
  12  -2  -4   28.80    2.40
 -12   2   4   19.60    3.00
  12   2  -4   31.90    2.60
  12   2  -4   23.80    2.90
 -12   2   4   31.40    3.10
 -12   2   4   26.50    3.50
  12   2  -4   25.30    2.90
 -10  -2   4  537.05   33.20
 -10  -2   4  531.95   32.60
  10  -2  -4  507.95   32.10
 -10  -2   4  506.85   33.80
 -10  -2   4  484.85   33.30
  10  -2  -4  560.04   33.00
 -10  -2   4  488.95   32.90
 -10  -2   4  427.26   32.60
  10  -2  -4  537.65   32.20
  10  -2  -4  517.95   33.70
  10  -2  -4  505.55   32.10
 -10   2   4  430.06   33.20
 -10   2   4  455.65   32.70
  10   2  -4  476.05   33.90
  10   2  -4  563.74   32.20
 -10   2   4  504.55   33.20
  10   2  -4  532.15   32.20
 -10   2   4  477.35   32.90
 -10   2   4  495.65   32.30
  10   2  -4  498.75   37.20
  10   2  -4  533.45   33.20
 -10   2   4  557.84   33.20
  10   2  -4  511.75   32.10
 -10   2   4  551.24   32.90
 -10   2   4  490.85   34.20
 -10   2   4  473.25   32.00
  -8  -2   4   10.80    4.40
   8  -2  -4   13.10    4.60
  -8  -2   4   13.10    3.20
  -8  -2   4   13.20    3.80
   8  -2  -4   12.40    2.20
   8  -2  -4   12.20    2.80
  -8  -2   4   13.90    4.20
   8  -2  -4   13.10    3.50
  -8  -2   4   13.00    4.10
  -8  -2   4    6.30    3.80
  -8  -2   4   10.70    3.90
  -8   2   4   16.80    2.90
  -8   2   4   17.20    4.20
  -8   2   4   15.10    4.60
  -8   2   4   13.10    3.90
  -8   2   4   15.70    4.40
  -8   2   4   12.50    3.30
  -8   2   4   12.20    3.30
   8   2  -4    8.70    2.10
   8   2  -4   13.30    4.00
  -8   2   4   12.40    4.70
  -8   2   4   14.20    2.50
   8   2  -4   10.10    2.90
   8   2  -4   17.80    2.80
  -8   2   4   15.40    3.50
   6  -2  -4  182.58   12.30
  -6  -2   4  188.28   12.40
   6  -2  -4  172.28   13.00
  -6  -2   4  179.08   12.30
  -6  -2   4  181.98   12.20
  -6  -2   4  190.08   12.60
   6  -2  -4  151.58   11.50
  -6  -2   4  155.18   11.80
   6   2  -4  155.58   11.30
  -6   2   4  190.88   12.30
   6   2  -4  170.48   12.60
  -6   2   4  179.28   12.10
   6   2  -4  177.78   13.90
  -6   2   4  205.78   12.90
   6   2  -4  162.08   11.90
  -6   2   4  174.38   13.40
  -6   2   4  147.99   11.90
  -6   2   4  176.48   13.60
  -6   2   4  185.68   11.80
   4  -2  -4   11.30    2.20
  -4  -2   4    5.40    3.00
   4  -2  -4   12.60    2.10
  -4  -2   4    8.90    5.40
  -4  -2   4    9.60    2.30
  -4  -2   4   11.60    2.40
  -4   2   4   14.40    3.40
   4   2  -4   14.20    2.70
  -4   2   4   12.70    4.90
   4   2  -4   15.20    4.00
   4   2  -4   13.80    2.80
  -2  -2   4 2996.50  187.68
  -2  -2   4 2849.42  188.28
   2  -2  -4 3366.86  187.88
   2  -2  -4 3157.28  187.68
  -2  -2   4 2543.75  187.68
   2   2  -4 3075.69  187.98
  -2   2   4 3143.69  188.28
  -2   2   4 3064.19  187.68
  -2   2   4 2886.91  187.78
   2   2  -4 3123.99  188.38
  -2   2   4 3101.69  187.78
   0  -2  -4  901.61   55.59
   0  -2   4  976.50   55.69
   0  -2  -4  820.32   55.39
   0   2   4  976.70   56.09
   0   2  -4  826.02   55.39
   0   2  -4  843.42   55.69
   0   2   4  908.81   55.79
   0   2   4  860.11   55.59
  -2  -2  -4  470.05   30.90
   2  -2   4  425.96   30.70
  -2  -2  -4  522.35   31.00
  -2  -2  -4  529.95   31.10
  -2  -2  -4  483.05   31.60
   2  -2   4  479.05   31.00
   2  -2   4  513.15   30.90
   2   2   4  434.96   30.70
   2   2   4  560.74   31.50
  -4  -2  -4   27.10    3.20
   4  -2   4   19.30    3.10
  -4  -2  -4   19.40    3.40
   4  -2   4   19.30    3.90
  -4  -2  -4   24.30    2.80
  -4  -2  -4   23.30    3.10
   4   2   4   23.10    3.10
   4   2   4   16.30    3.00
   4   2   4   21.70    4.40
  -4   2  -4   24.80    2.70
  -6  -2  -4   39.90    4.60
   6  -2   4   37.10    3.60
  -6  -2  -4   33.50    3.70
  -6  -2  -4   40.90    4.70
  -6  -2  -4   34.30    5.00
   6  -2   4   34.50    4.70
  -6  -2  -4   39.20    4.40
  -6   2  -4   36.40    4.00
   6   2   4   39.60    4.00
   6   2   4   37.10    5.80
  -6   2  -4   35.70    4.10
  -6   2  -4   45.60    3.90
  -6   2  -4   38.70    3.60
  -6   2  -4   29.40    4.20
  -6   2  -4   46.10    5.40
  -6   2  -4   33.50    3.70
   6   2   4   42.50    3.50
   6   2   4   40.30    4.60
  -6   2  -4   35.90    3.50
  -6   2  -4   35.50    3.80
  -6   2  -4   47.50    5.30
  -8  -2  -4   92.89    7.90
   8  -2   4  100.29   10.00
  -8  -2  -4  100.99   10.20
  -8  -2  -4   90.69    7.80
   8  -2   4  104.99    9.10
  -8  -2  -4   75.39    8.50
  -8  -2  -4   89.09    9.00
  -8  -2  -4   98.29    7.70
   8  -2   4  104.79    6.90
   8  -2   4   99.39    7.70
  -8  -2  -4   93.99    7.90
   8   2   4   92.89    8.20
  -8   2  -4   98.59    8.10
  -8   2  -4   80.69    8.30
  -8   2  -4  105.09    9.20
   8   2   4   96.19    7.70
  -8   2  -4  109.49    8.50
  -8   2  -4   90.49    9.50
   8   2   4   93.29    7.20
  -8   2  -4   97.99    9.60
  -8   2  -4  104.99    7.80
  -8   2  -4   96.69    7.70
   8   2   4   95.19    8.60
   8   2   4   87.19   11.00
  -8   2  -4  101.49    7.80
  10  -2   4  316.37   22.60
 -10  -2  -4  297.17   21.70
 -10  -2  -4  324.87   22.80
  10  -2   4  346.77   22.00
 -10  -2  -4  320.47   21.70
  10  -2   4  318.17   21.20
 -10  -2  -4  369.36   21.70
 -10  -2  -4  337.87   21.70
 -10  -2  -4  324.57   23.20
 -10  -2  -4  342.57   21.60
  10   2   4  323.57   21.20
 -10   2  -4  308.37   23.00
 -10   2  -4  318.97   21.50
  10   2   4  336.97   21.30
  10   2   4  350.16   22.10
 -10   2  -4  302.47   23.30
  10   2   4  351.06   21.20
 -10   2  -4  344.37   21.70
 -10   2  -4  315.07   21.50
 -10   2  -4  346.87   22.10
  10   2   4  337.47   22.50
  12  -2   4    2.30    1.30
 -12  -2  -4    2.70    2.40
 -12  -2  -4    2.50    2.00
 -12  -2  -4    2.20    1.80
 -12  -2  -4    1.00    1.40
 -12   2  -4    3.20    1.70
 -12   2  -4    3.50    2.00
  12   2   4    1.70    1.50
 -12   2  -4    2.80    2.10
  12   2   4    2.80    1.40
 -12   2  -4    2.10    1.60
 -11  -3   4   40.50    5.10
 -11  -3   4   36.30    4.50
  11  -3  -4   46.30    3.50
  11  -3  -4   42.10    3.70
 -11  -3   4   34.30    3.80
 -11  -3   4   37.70    4.50
  11  -3  -4   41.30    3.90
 -11  -3   4   42.10    4.60
 -11  -3   4   36.00    4.20
  11  -3  -4   41.00    4.80
 -11  -3   4   32.30    5.20
 -11   3   4   48.40    9.10
 -11   3   4   33.60    3.60
  11   3  -4   44.80    3.60
 -11   3   4   43.90    4.20
  11   3  -4   32.90    3.70
 -11   3   4   32.10    4.20
 -11   3   4   37.90    4.60
  11   3  -4   35.10    4.60
 -11   3   4   33.60    5.00
  11   3  -4   33.90    3.70
 -11   3   4   37.20    4.40
  -9  -3   4   32.40    3.90
   9  -3  -4   33.00    4.60
  -9  -3   4   32.50    5.10
  -9  -3   4   36.10    5.10
  -9  -3   4   31.50    4.50
  -9  -3   4   32.50    4.60
  -9  -3   4   36.60    5.80
   9  -3  -4   20.80    5.80
   9  -3  -4   27.60    3.40
   9  -3  -4   32.40    5.40
  -9  -3   4   36.60    4.30
   9   3  -4   28.60    3.60
  -9   3   4   30.10    3.50
  -9   3   4   33.80    4.50
  -9   3   4   38.30    4.70
  -9   3   4   23.10    5.20
  -9   3   4   32.70    3.90
  -9   3   4   32.40    4.90
   9   3  -4   24.60    3.40
   9   3  -4   26.40    7.30
   9   3  -4   35.20    3.60
  -9   3   4   34.80    4.10
   9   3  -4   28.80    4.80
   9   3  -4   17.00    5.10
  -9   3   4   23.40    4.20
  -9   3   4   37.60    4.70
   7  -3  -4  309.27   19.80
   7  -3  -4  288.07   19.00
   7  -3  -4  249.18   18.60
  -7  -3   4  297.47   20.20
  -7  -3   4  303.87   19.90
  -7  -3   4  297.57   19.70
  -7  -3   4  314.87   20.10
  -7  -3   4  307.37   20.80
   7  -3  -4  292.57   20.70
  -7   3   4  266.27   19.00
  -7   3   4  313.77   20.20
   7   3  -4  294.37   20.40
  -7   3   4  283.17   20.30
  -7   3   4  321.47   19.20
  -7   3   4  266.37   19.40
   7   3  -4  277.37   18.80
  -7   3   4  298.37   21.20
   7   3  -4  300.27   18.80
  -7   3   4  319.07   19.70
  -7   3   4  253.97   19.50
  -7   3   4  298.27   21.60
   7   3  -4  273.57   19.40
  -7   3   4  297.57   19.50
  -7   3   4  314.87   19.90
   7   3  -4  302.17   18.80
  -5  -3   4  938.01   60.29
  -5  -3   4  892.41   63.29
  -5  -3   4  932.41   60.09
   5  -3  -4  940.71   60.09
  -5  -3   4  914.61   59.59
   5  -3  -4  923.41   59.69
  -5  -3   4  968.80   59.99
   5  -3  -4  951.20   59.29
  -5  -3   4  942.11   59.89
  -5   3   4 1022.20   60.19
   5   3  -4  940.21   60.29
   5   3  -4  968.90   61.19
  -5   3   4 1017.00   61.29
   5   3  -4  917.11   59.19
   5   3  -4  918.21   59.69
  -5   3   4  978.60   59.79
  -5   3   4  999.50   59.89
  -3  -3   4  917.81   60.19
   3  -3  -4 1027.10   59.79
  -3  -3   4  968.80   59.79
  -3  -3   4  926.11   59.89
   3  -3  -4  828.52   59.49
  -3  -3   4  906.61   60.79
  -3  -3   4  956.10   59.99
  -3  -3   4  932.91   60.19
  -3  -3   4  870.71   59.79
  -3   3   4  987.10   60.09
  -3   3   4 1043.60   60.89
  -3   3   4 1031.60   59.89
   3   3  -4  994.30   60.29
   3   3  -4  965.80   59.79
  -3   3   4  990.10   59.99
   3   3  -4  986.10   60.89
  -1  -3   4 4560.04  256.57
  -1  -3   4 4205.58  255.87
  -1  -3   4 3946.21  255.87
  -1  -3   4 3907.51  255.67
   1   3  -4 4284.87  256.37
  -1   3   4 4076.89  255.87
  -1   3   4 3935.31  255.97
   1  -3   4 2522.15  165.38
  -1  -3  -4 2476.05  165.48
  -1  -3  -4 2717.73  165.38
  -1  -3  -4 2383.86  165.18
   1  -3   4 2775.62  165.38
  -1  -3  -4 2721.23  165.78
   1   3   4 2787.42  165.68
   1   3   4 2936.61  165.48
  -3  -3  -4  623.24   37.50
  -3  -3  -4  571.74   37.10
  -3  -3  -4  591.74   36.90
  -3  -3  -4  547.75   37.00
  -3  -3  -4  551.14   36.60
  -3  -3  -4  550.24   36.80
   3   3   4  631.14   36.90
   3   3   4  598.14   37.60
  -5  -3  -4  473.45   29.50
  -5  -3  -4  385.36   28.80
  -5  -3  -4  457.75   29.50
   5  -3   4  452.35   28.90
  -5  -3  -4  431.26   29.00
  -5   3  -4  410.66   28.70
   5   3   4  489.05   28.30
   5   3   4  464.95   30.00
   5   3   4  479.05   29.00
   5   3   4  450.85   28.70
   7  -3   4  406.96   25.60
  -7  -3  -4  384.26   24.70
   7  -3   4  401.36   24.30
  -7  -3  -4  368.96   25.50
  -7  -3  -4  355.66   25.70
  -7  -3  -4  397.76   24.70
  -7  -3  -4  374.46   26.10
  -7  -3  -4  369.56   24.50
  -7   3  -4  378.46   24.70
  -7   3  -4  417.76   26.00
  -7   3  -4  357.16   24.90
   7   3   4  366.56   24.70
   7   3   4  391.56   25.20
  -7   3  -4  337.47   24.60
  -7   3  -4  402.56   24.30
   7   3   4  376.46   24.10
  -7   3  -4  401.96   24.60
   7   3   4  352.86   26.50
   7   3   4  391.86   24.10
   7   3   4  394.86   24.20
  -7   3  -4  370.36   24.40
  -7   3  -4  333.47   24.50
  -7   3  -4  365.66   24.60
  -7   3  -4  392.76   26.10
  -9  -3  -4  326.47   22.00
  -9  -3  -4  338.17   22.30
  -9  -3  -4  336.27   23.90
   9  -3   4  337.27   23.00
  -9  -3  -4  340.57   22.10
   9  -3   4  326.87   23.50
   9  -3   4  381.66   22.30
  -9  -3  -4  327.17   23.40
  -9  -3  -4  348.57   22.00
  -9  -3  -4  290.47   22.70
   9  -3   4  339.57   21.60
   9   3   4  346.07   21.60
   9   3   4  333.07   21.70
  -9   3  -4  377.46   22.40
  -9   3  -4  288.57   23.40
  -9   3  -4  326.47   22.00
  -9   3  -4  322.77   21.90
   9   3   4  368.16   23.10
   9   3   4  339.67   21.70
  -9   3  -4  319.87   22.00
  -9   3  -4  322.87   22.50
  -9   3  -4  364.56   22.20
   9   3   4  335.87   24.90
 -11  -3  -4  168.38   13.80
 -11  -3  -4  166.98   13.00
 -11  -3  -4  208.28   15.50
 -11  -3  -4  208.68   13.10
  11  -3   4  199.08   13.10
 -11  -3  -4  169.48   13.00
 -11  -3  -4  191.68   12.90
  11   3   4  221.18   12.80
 -11   3  -4  185.28   13.40
 -11   3  -4  211.28   13.50
  11   3   4  214.28   13.00
 -11   3  -4  193.98   13.10
  11   3   4  192.28   13.30
  11   3   4  190.88   13.60
 -12  -4   4  124.69    8.30
 -12  -4   4  113.59    8.10
  12  -4  -4  102.99    8.00
 -12  -4   4  108.49    8.10
 -12   4   4  113.09    8.10
  12   4  -4  124.79    7.90
 -12   4   4  128.29    8.50
  12   4  -4  119.09    8.30
  12   4  -4  131.29    7.90
 -10  -4   4   56.29    5.90
 -10  -4   4   54.49    5.80
 -10  -4   4   54.89    5.30
 -10  -4   4   56.89    5.90
  10  -4  -4   61.09    5.80
  10  -4  -4   64.59    4.70
 -10  -4   4   47.00    4.60
 -10  -4   4   51.29    7.00
 -10   4   4   51.09    6.60
 -10   4   4   55.99    6.50
 -10   4   4   47.70    5.20
  10   4  -4   56.69    4.90
  10   4  -4   55.19    4.70
 -10   4   4   61.29    5.60
 -10   4   4   61.99    5.70
  10   4  -4   52.49    6.30
  10   4  -4   52.99    5.90
 -10   4   4   57.49    5.60
 -10   4   4   52.09    9.60
 -10   4   4   58.09    4.80
  10   4  -4   57.79    4.60
 -10   4   4   51.79    4.70
  -8  -4   4  329.17   20.50
   8  -4  -4  301.17   20.30
   8  -4  -4  293.07   25.00
   8  -4  -4  252.77   18.90
  -8  -4   4  286.27   20.00
  -8  -4   4  286.57   20.20
   8  -4  -4  296.67   19.60
  -8  -4   4  309.77   20.60
  -8  -4   4  288.37   21.00
  -8   4   4  293.87   19.50
  -8   4   4  324.77   20.20
   8   4  -4  297.47   21.10
  -8   4   4  311.47   20.70
  -8   4   4  307.77   20.20
   8   4  -4  302.27   19.20
  -8   4   4  289.57   21.60
  -8   4   4  304.57   19.60
   8   4  -4  291.17   19.30
   8   4  -4  298.17   20.20
  -8   4   4  282.87   19.90
   8   4  -4  278.87   22.60
  -8   4   4  282.17   19.80
   8   4  -4  315.57   19.30
  -8   4   4  311.17   20.10
  -6  -4   4  218.78   16.00
   6  -4  -4  223.98   15.90
   6  -4  -4  209.18   14.40
   6  -4  -4  236.28   15.30
  -6  -4   4  223.38   15.40
   6   4  -4  232.38   14.80
  -6   4   4  224.58   14.90
  -6   4   4  222.28   15.60
  -6   4   4  230.58   17.10
  -6   4   4  236.78   16.20
  -6   4   4  236.48   15.20
   6   4  -4  199.58   14.40
   6   4  -4  202.08   18.30
  -6   4   4  243.28   16.80
   6   4  -4  244.58   15.00
  -6   4   4  234.58   15.30
  -6   4   4  220.68   15.00
  -6   4   4  215.48   15.20
  -6   4   4  210.88   15.10
   6   4  -4  218.28   15.10
  -6   4   4  207.48   15.40
  -4  -4   4   82.89    7.60
  -4  -4   4   92.49    7.30
   4  -4  -4  111.19    6.90
  -4  -4   4   83.79    7.50
  -4  -4   4   89.59    8.40
  -4  -4   4  101.99    7.10
  -4  -4   4  109.49    7.30
  -4   4   4   99.19    7.50
  -4   4   4   94.59    7.20
   4   4  -4  115.19    9.50
  -4   4   4   95.79    7.10
   4   4  -4   95.89    7.60
   4   4  -4   98.19    7.20
  -4   4   4   77.49    8.10
   2  -4  -4  431.16   27.50
  -2  -4   4  411.26   27.60
  -2  -4   4  438.36   27.80
   2  -4  -4  413.06   27.50
  -2  -4   4  433.76   28.10
  -2  -4   4  398.56   27.90
   2  -4  -4  482.45   28.00
  -2  -4   4  437.26   28.70
  -2  -4   4  443.26   27.80
  -2   4   4  429.46   27.90
   2   4  -4  428.76   28.00
  -2   4   4  442.76   27.70
  -2   4   4  455.15   27.80
  -2   4   4  492.15   28.70
   0  -4   4  630.34   46.10
   0  -4   4  786.12   46.80
   0  -4  -4  714.73   46.40
   0  -4  -4  745.93   46.40
   0  -4  -4  761.02   46.90
   0   4   4  705.03   46.30
   0   4   4  714.73   46.50
   0   4   4  790.92   47.00
   0   4   4  782.62   46.70
   0   4   4  778.42   47.30
  -2  -4  -4   40.80    3.90
  -2  -4  -4   32.10    3.80
   2   4   4   37.90    3.70
   2   4   4   36.70    3.40
  -4  -4  -4  183.68   12.40
  -4  -4  -4  167.98   11.90
  -4  -4  -4  181.28   11.90
  -4  -4  -4  155.78   11.30
  -4  -4  -4  168.58   11.40
  -4  -4  -4  177.08   11.30
   4   4   4  133.89   12.00
   4   4   4  152.48   10.50
   4   4   4  146.59   11.10
  -6  -4  -4   25.30    5.00
  -6  -4  -4   26.20    4.30
  -6  -4  -4   29.20    4.90
  -6  -4  -4   18.80    3.20
  -6  -4  -4   32.40    4.40
  -6   4  -4   19.30    3.00
   6   4   4   18.60    3.80
   6   4   4   21.60    2.80
  -6   4  -4   26.10    3.30
  -6   4  -4   32.40    5.10
   6   4   4   23.40    3.00
  -6   4  -4   23.50    3.10
  -6   4  -4   26.50    3.60
   6   4   4   27.60    5.60
  -6   4  -4   15.80    3.70
   6   4   4   23.30    2.90
  -6   4  -4   26.90    3.60
  -6   4  -4   21.60    3.00
  -6   4  -4   23.70    3.50
  -6   4  -4   24.40    3.40
   8  -4   4  277.67   18.90
  -8  -4  -4  239.08   18.10
  -8  -4  -4  236.48   18.90
  -8  -4  -4  260.67   18.00
  -8  -4  -4  260.87   19.60
  -8  -4  -4  265.47   19.30
   8  -4   4  300.07   18.00
   8  -4   4  256.07   19.40
  -8  -4  -4  284.87   18.20
  -8   4  -4  307.97   18.40
  -8   4  -4  275.47   19.50
   8   4   4  273.67   17.80
   8   4   4  284.97   18.90
  -8   4  -4  284.07   20.00
  -8   4  -4  236.48   18.20
   8   4   4  257.57   17.70
  -8   4  -4  270.37   18.30
  -8   4  -4  294.87   18.80
  -8   4  -4  268.37   18.00
   8   4   4  272.37   17.60
  -8   4  -4  299.97   18.00
  -8   4  -4  284.07   18.30
  -8   4  -4  269.67   18.20
   8   4   4  279.17   21.60
 -10  -4  -4   50.09    6.50
 -10  -4  -4   52.29    5.10
 -10  -4  -4   54.39    5.30
  10  -4   4   64.99    4.90
  10  -4   4   64.49    8.50
 -10  -4  -4   59.09    7.10
 -10  -4  -4   55.19    6.70
 -10  -4  -4   62.49    5.30
  10   4   4   65.89    6.30
  10   4   4   67.29    4.90
 -10   4  -4   73.89    5.70
  10   4   4   57.99    5.10
 -10   4  -4   57.39    5.10
 -10   4  -4   61.39    5.10
 -10   4  -4   61.59    5.40
 -10   4  -4   53.49    6.70
  10   4   4   62.19    6.10
 -10   4  -4   65.49    5.50
  10   4   4   71.59    5.70
 -10   4  -4   63.39    5.80
 -11  -5   4   22.10    5.30
  11  -5  -4   33.20    3.30
 -11  -5   4   31.00    4.40
 -11  -5   4   31.30    5.20
 -11  -5   4   38.90    5.30
 -11  -5   4   31.70    3.30
  11  -5  -4   34.30    4.60
 -11   5   4   26.80    3.60
 -11   5   4   29.50    5.50
  11   5  -4   31.40    3.20
 -11   5   4   36.40    3.30
  -9  -5   4  200.88   17.10
  -9  -5   4  207.78   16.50
   9  -5  -4  268.27   19.90
  -9  -5   4  231.98   16.30
   9  -5  -4  241.38   16.00
   9  -5  -4  228.08   15.20
  -9  -5   4  219.38   16.00
   9  -5  -4  223.08   16.90
  -9  -5   4  243.38   16.50
  -9   5   4  216.28   16.20
   9   5  -4  229.18   16.40
  -9   5   4  204.68   15.80
   9   5  -4  235.88   18.10
   9   5  -4  262.57   17.70
  -9   5   4  243.08   16.30
  -9   5   4  214.98   16.60
  -9   5   4  245.98   16.20
   9   5  -4  259.57   15.50
   9   5  -4  245.38   15.40
  -9   5   4  230.28   17.90
   9   5  -4  231.08   15.50
  -9   5   4  241.38   16.10
  -9   5   4  250.87   15.60
  -9   5   4  249.28   15.70
  -7  -5   4   31.40    5.00
  -7  -5   4   28.20    4.30
  -7  -5   4   22.90    5.10
   7  -5  -4   27.80    5.50
  -7  -5   4   25.00    4.20
  -7  -5   4   24.80    4.60
   7  -5  -4   25.80    3.40
   7  -5  -4   27.90    4.50
   7   5  -4   23.80    4.30
   7   5  -4   40.60    7.70
  -7   5   4   23.00    5.10
  -7   5   4   22.60    3.80
   7   5  -4   22.00    4.90
  -7   5   4   26.30    4.00
  -7   5   4   31.80    6.00
  -7   5   4   24.10    4.80
  -7   5   4   24.90    3.80
   7   5  -4   31.50    4.80
  -7   5   4   29.80    3.70
  -7   5   4   32.60    4.60
   7   5  -4   23.40    3.20
  -7   5   4   28.30    4.10
  -7   5   4   28.20    4.70
  -7   5   4   33.30    3.60
  -7   5   4   36.60    4.50
   7   5  -4   21.50    3.20
  -5  -5   4  245.98   17.10
  -5  -5   4  229.18   15.70
  -5  -5   4  230.78   16.30
  -5  -5   4  235.18   17.00
   5  -5  -4  249.08   16.10
  -5  -5   4  222.28   15.60
  -5  -5   4  213.88   18.00
  -5  -5   4  242.88   16.70
  -5  -5   4  238.38   16.40
   5  -5  -4  266.87   16.10
   5  -5  -4  268.17   16.60
  -5  -5   4  236.18   16.20
   5   5  -4  241.78   15.70
   5   5  -4  253.47   15.70
  -5   5   4  248.08   16.70
  -5   5   4  272.97   17.30
  -5   5   4  254.67   16.30
  -5   5   4  228.78   16.00
   5   5  -4  252.57   16.40
  -5   5   4  251.97   16.40
  -5   5   4  249.97   18.10
   5   5  -4  226.48   17.80
   5   5  -4  238.98   15.70
   5   5  -4  246.08   17.00
  -5   5   4  255.87   16.20
  -5   5   4  261.97   17.90
  -3  -5   4  875.51   52.19
   3  -5  -4  850.91   52.09
  -3  -5   4  715.83   51.89
  -3  -5   4  834.32   52.49
  -3  -5   4  858.41   52.19
  -3  -5   4  850.41   51.89
   3  -5  -4  808.72   51.69
  -3  -5   4  834.02   52.59
   3  -5  -4  787.72   51.69
  -3  -5   4  809.12   53.39
  -3   5   4  812.52   51.99
  -3   5   4  845.32   52.29
   3   5  -4  839.12   52.39
  -3   5   4  900.41   53.29
   3   5  -4  792.82   52.89
  -3   5   4  835.72   51.99
  -1  -5   4  181.58   11.70
   1  -5  -4  175.58   12.50
   1  -5  -4  170.98   11.80
  -1  -5   4  174.18   11.80
  -1  -5   4  163.68   11.90
   1  -5  -4  173.88   11.70
  -1  -5   4  181.58   12.80
  -1  -5   4  162.28   11.50
   1   5  -4  178.08   11.70
   1   5  -4  175.68   11.40
  -1   5   4  178.98   12.20
  -1   5   4  186.08   12.10
  -1   5   4  178.98   11.70
  -1   5   4  189.08   13.00
  -1  -5  -4  106.89    7.80
   1  -5   4  109.69    8.30
  -1  -5  -4   93.39    7.90
  -1  -5  -4   94.49    7.80
  -1  -5  -4  107.29    9.00
   1  -5   4  120.09    7.80
   1  -5   4  106.29    7.60
   1   5   4  115.69    8.10
   1   5   4  108.29    8.50
  -1   5  -4   89.09    7.00
   1   5   4   98.29    8.10
  -3  -5  -4 1095.79   65.79
  -3  -5  -4  994.90   64.29
  -3  -5  -4 1038.90   64.89
  -3  -5  -4 1004.20   64.59
  -3  -5  -4 1008.00   64.59
  -3  -5  -4  971.40   65.09
  -3  -5  -4 1068.49   65.09
  -3  -5  -4  997.80   65.09
   3   5   4 1024.80   64.49
   3   5   4 1119.89   64.89
   3   5   4 1042.00   65.49
  -5  -5  -4   46.20    4.50
  -5  -5  -4   50.19    5.70
  -5  -5  -4   47.20    5.40
  -5  -5  -4   45.40    5.10
  -5  -5  -4   43.10    5.60
   5   5   4   51.79    4.90
  -5   5  -4   45.60    4.50
   5   5   4   48.70    6.70
   5   5   4   45.30    3.80
  -5   5  -4   48.20    4.60
  -5   5  -4   49.90    4.30
   5   5   4   42.50    3.60
  -5   5  -4   48.40    4.90
  -5   5  -4   49.80    5.70
  -5   5  -4   43.20    4.30
   5   5   4   47.40    4.50
  -5   5  -4   43.00    4.00
  -5   5  -4   42.80    3.90
   5   5   4   42.60    4.40
  -5   5  -4   43.90    4.30
  -7  -5  -4  148.69   12.00
  -7  -5  -4  177.18   12.20
  -7  -5  -4  166.88   12.50
  -7  -5  -4  156.78   13.00
  -7  -5  -4  168.28   13.90
  -7  -5  -4  167.18   13.20
   7   5   4  202.48   12.30
  -7   5  -4  174.88   12.40
   7   5   4  189.88   12.00
  -7   5  -4  191.78   13.60
  -7   5  -4  181.48   12.00
  -7   5  -4  196.18   12.40
   7   5   4  171.18   12.40
   7   5   4  156.18   11.80
  -7   5  -4  183.68   12.30
  -7   5  -4  189.38   14.10
   7   5   4  169.38   15.00
   7   5   4  185.48   13.00
  -7   5  -4  150.38   13.90
  -7   5  -4  179.58   13.70
  -9  -5  -4   92.69    7.20
  -9  -5  -4   86.89    8.70
  -9  -5  -4   75.19    8.50
  -9  -5  -4   88.99    9.40
  -9  -5  -4   95.69    7.50
  -9  -5  -4   83.89    7.00
   9  -5   4   93.49    7.20
  -9  -5  -4   72.49    8.90
   9  -5   4   89.09    8.30
   9   5   4  101.09    6.80
  -9   5  -4   75.89    7.40
  -9   5  -4  102.79    7.40
  -9   5  -4   81.69    8.70
   9   5   4  100.99    7.10
   9   5   4   93.59    7.90
  -9   5  -4   97.29    7.40
   9   5   4  105.09    7.10
   9   5   4   84.89   13.40
  -9   5  -4   89.69    7.10
  -9   5  -4   99.79    7.40
  -9   5  -4  106.79    7.90
   9   5   4  108.49    9.20
  -9   5  -4  108.89    7.30
 -11  -5  -4  202.28   14.20
 -11  -5  -4  176.58   13.10
 -11  -5  -4  202.28   13.30
 -11  -5  -4  199.68   14.30
 -11  -5  -4  201.68   13.10
 -11   5  -4  168.18   13.80
 -11   5  -4  205.68   13.10
  11   5   4  207.48   13.00
  11   5   4  212.58   12.90
 -11   5  -4  201.88   13.30
 -11   5  -4  212.48   13.60
 -10  -6   4  590.04   37.00
 -10  -6   4  513.45   37.20
 -10  -6   4  480.35   37.20
  10  -6  -4  574.14   36.90
  10  -6  -4  599.04   36.30
 -10  -6   4  502.75   37.60
 -10  -6   4  573.14   37.20
 -10   6   4  632.94   37.00
  10   6  -4  645.04   36.30
 -10   6   4  647.04   36.50
 -10   6   4  552.54   36.60
  10   6  -4  574.54   36.20
 -10   6   4  559.14   36.90
 -10   6   4  556.84   38.30
  10   6  -4  570.24   36.30
 -10   6   4  651.23   37.10
  10   6  -4  546.95   37.70
   8  -6  -4   34.30    6.50
  -8  -6   4   36.70    5.40
   8  -6  -4   36.50    4.20
  -8  -6   4   31.50    5.00
  -8  -6   4   33.50    5.20
  -8  -6   4   34.60    4.90
  -8  -6   4   35.10    4.30
   8  -6  -4   25.60    4.20
   8  -6  -4   40.90    5.40
  -8   6   4   38.90    4.40
   8   6  -4   36.10    3.80
   8   6  -4   35.20    4.80
  -8   6   4   37.60    4.60
  -8   6   4   29.50    4.40
  -8   6   4   35.60    4.20
   8   6  -4   41.10    3.70
  -8   6   4   36.30    4.10
  -8   6   4   38.40    3.90
  -8   6   4   39.60    4.70
  -8   6   4   39.40    4.30
  -8   6   4   32.60    5.20
   8   6  -4   60.69   11.90
  -8   6   4   35.70    6.00
   8   6  -4   36.10    3.70
   8   6  -4   46.50    7.40
   8   6  -4   40.60    5.30
   6  -6  -4 2583.14  170.58
   6  -6  -4 2605.64  169.68
  -6  -6   4 2819.12  170.88
   6  -6  -4 2733.03  170.28
  -6  -6   4 2635.14  170.28
  -6  -6   4 2687.13  170.58
  -6  -6   4 2690.33  171.28
  -6  -6   4 2716.23  171.28
   6   6  -4 2855.31  171.28
  -6   6   4 2891.71  170.58
   6   6  -4 2798.62  170.48
  -6   6   4 3135.79  172.58
  -6   6   4 2638.04  170.08
   6   6  -4 2785.32  169.78
  -6   6   4 2878.81  170.38
  -6   6   4 2733.83  170.48
   6   6  -4 2642.94  172.88
  -6   6   4 2839.82  172.68
  -6   6   4 2931.61  170.98
  -6   6   4 2428.76  170.38
  -6   6   4 2749.92  170.38
  -6   6   4 2446.66  170.28
   6   6  -4 2792.32  169.78
  -6   6   4 2440.26  170.08
   6   6  -4 2938.91  169.78
  -6   6   4 2662.03  170.08
  -6   6   4 2816.42  170.18
   4  -6  -4   50.09    4.40
  -4  -6   4   57.29    5.70
  -4  -6   4   58.69    5.90
  -4  -6   4   71.39    5.50
  -4  -6   4   56.49    5.00
  -4  -6   4   56.49    5.30
  -4  -6   4   56.59    4.40
  -4  -6   4   52.09    6.90
   4  -6  -4   56.39    4.60
   4   6  -4   60.59    4.80
   4   6  -4   55.49    5.50
   4   6  -4   60.39    5.30
  -4   6   4   53.39    5.50
  -4   6   4   57.39    6.90
  -4   6   4   54.39    5.00
   4   6  -4   61.19    4.30
  -4   6   4   54.49    5.00
   4   6  -4   57.79    6.80
  -2  -6   4 2097.19  132.39
  -2  -6   4 2067.09  133.59
   2  -6  -4 2107.19  132.09
  -2  -6   4 2063.29  132.79
   2  -6  -4 2200.88  132.09
  -2  -6   4 1960.30  132.69
   2  -6  -4 2081.69  132.59
  -2  -6   4 2168.18  132.09
  -2  -6   4 2221.28  132.39
  -2   6   4 2125.39  132.19
  -2   6   4 2125.69  132.59
   2   6  -4 2020.30  132.39
  -2   6   4 2288.27  133.49
   2   6  -4 2092.89  132.99
   2   6  -4 2269.07  132.49
   0  -6   4  221.78   15.80
   0  -6  -4  238.18   16.30
   0  -6  -4  238.58   15.90
   0  -6  -4  247.08   16.80
   0  -6   4  243.98   15.60
   0  -6  -4  244.78   15.80
   0  -6   4  230.08   15.50
   0  -6   4  232.88   15.60
   0  -6   4  250.07   16.60
   0   6  -4  241.08   15.40
   0   6   4  267.07   17.30
   0   6   4  232.48   16.10
   0   6   4  247.98   16.20
  -2  -6  -4 1461.95   91.89
  -2  -6  -4 1431.96   91.19
   2  -6   4 1384.86   91.69
  -2  -6  -4 1523.45   91.69
  -2  -6  -4 1490.65   92.69
   2  -6   4 1480.75   91.59
  -2  -6  -4 1451.95   91.89
  -2   6  -4 1359.96   91.59
   2   6   4 1565.54   91.89
   2   6   4 1522.45   92.29
  -4  -6  -4 1393.36   89.89
  -4  -6  -4 1417.26   90.39
  -4  -6  -4 1351.56   89.39
  -4  -6  -4 1410.46   89.99
  -4  -6  -4 1513.85   90.49
  -4  -6  -4 1461.25   90.69
  -4  -6  -4 1456.75   90.89
  -4  -6  -4 1478.75   91.39
   4   6   4 1399.76   91.09
   4   6   4 1390.46   89.79
  -4   6  -4 1539.65   90.79
   4   6   4 1465.35   89.59
   4   6   4 1397.16   89.49
   4   6   4 1487.55   90.29
  -4   6  -4 1403.86   90.39
  -4   6  -4 1458.35   89.89
  -4   6  -4 1457.45   90.09
  -6  -6  -4  260.47   18.50
  -6  -6  -4  259.67   18.60
  -6  -6  -4  244.58   17.10
  -6  -6  -4  252.57   17.80
  -6   6  -4  270.47   18.20
  -6   6  -4  248.58   17.10
   6   6   4  268.67   17.10
  -6   6  -4  244.58   16.90
  -6   6  -4  217.68   16.70
  -6   6  -4  254.67   16.70
   6   6   4  256.37   19.50
  -6   6  -4  241.28   16.70
  -6   6  -4  280.97   17.00
   6   6   4  258.37   16.50
   6   6   4  248.48   16.50
  -6   6  -4  239.18   17.20
   6   6   4  258.47   16.40
  -6   6  -4  251.97   17.10
   6   6   4  273.97   17.60
  -6   6  -4  256.37   16.80
  -6   6  -4  270.77   18.30
  -8  -6  -4   36.20    5.30
  -8  -6  -4   40.90    5.90
  -8  -6  -4   36.10    5.90
   8  -6   4   43.30    6.00
  -8  -6  -4   42.20    4.40
  -8  -6  -4   39.20    6.40
  -8   6  -4   47.40    4.60
   8   6   4   49.10    4.50
  -8   6  -4   40.40    6.40
  -8   6  -4   49.90    4.90
  -8   6  -4   42.00    5.30
   8   6   4   38.20    3.90
  -8   6  -4   46.00    4.90
   8   6   4   42.10    9.50
   8   6   4   48.40    5.50
  -8   6  -4   45.40    4.70
   8   6   4   44.60    4.30
  -8   6  -4   55.79    4.50
  -8   6  -4   50.59    5.10
  -8   6  -4   47.20    4.60
  -8   6  -4   47.00    4.50
 -10  -6  -4  481.25   32.30
 -10  -6  -4  471.65   31.00
 -10  -6  -4  426.16   31.80
 -10  -6  -4  490.15   30.90
 -10  -6  -4  508.85   32.60
  10   6   4  500.25   32.90
 -10   6  -4  522.15   31.30
  10   6   4  435.36   31.40
 -10   6  -4  472.55   31.40
 -10   6  -4  449.76   32.00
 -10   6  -4  526.85   31.20
  10   6   4  487.45   30.80
 -10   6  -4  472.05   30.90
 -10   6  -4  545.45   31.60
  10   6   4  477.55   30.80
  10   6   4  526.65   30.70
 -11  -7   4   22.00    2.90
 -11   7   4   21.30    3.40
 -11   7   4   17.30    2.60
 -11   7   4   19.60    2.90
  11   7  -4   20.70    2.10
   9  -7  -4  261.97   19.70
  -9  -7   4  277.47   21.30
  -9  -7   4  327.17   20.80
  -9  -7   4  282.37   20.80
   9  -7  -4  315.67   20.20
  -9  -7   4  297.17   20.50
  -9  -7   4  306.67   20.00
  -9   7   4  298.17   22.10
  -9   7   4  300.57   19.90
  -9   7   4  350.26   20.50
  -9   7   4  265.17   22.10
   9   7  -4  316.37   19.60
   9   7  -4  311.37   19.60
  -9   7   4  304.57   21.60
  -9   7   4  290.97   20.00
   9   7  -4  335.37   20.20
  -9   7   4  319.37   19.90
  -9   7   4  304.27   21.90
  -9   7   4  320.07   20.30
  -7  -7   4  100.49    8.00
  -7  -7   4  100.79    9.10
  -7  -7   4  106.29    8.60
   7  -7  -4  107.39   13.50
  -7  -7   4   97.59    9.40
   7  -7  -4   83.59    9.70
  -7  -7   4   95.39    8.40
  -7   7   4  102.19   10.70
  -7   7   4  115.69   10.20
  -7   7   4  116.39    8.40
  -7   7   4  102.89    8.90
  -7   7   4  101.29    7.70
   7   7  -4  105.79    7.40
  -7   7   4  120.69    8.50
  -7   7   4  107.39    8.20
   7   7  -4   95.99    7.30
  -7   7   4  110.19    8.40
   7   7  -4  101.69    8.00
  -7   7   4   89.19    8.00
  -7   7   4  101.99    7.80
   7   7  -4   94.99    7.20
   7   7  -4   84.09   10.40
  -7   7   4  103.09    9.10
  -5  -7   4  978.50   64.29
  -5  -7   4  994.70   64.99
  -5  -7   4 1028.70   65.09
  -5  -7   4 1027.20   64.89
  -5  -7   4  977.50   67.29
  -5  -7   4  968.50   64.29
  -5  -7   4 1056.99   65.39
   5  -7  -4 1091.29   64.69
  -5  -7   4 1044.80   65.79
   5  -7  -4 1055.59   64.99
   5  -7  -4  970.20   64.29
   5   7  -4  972.80   64.69
  -5   7   4 1107.69   65.59
   5   7  -4  988.80   64.69
  -5   7   4 1009.60   64.69
   5   7  -4 1083.09   65.79
  -5   7   4  880.31   64.79
  -5   7   4 1148.99   67.29
   5   7  -4  939.51   64.39
  -5   7   4 1081.79   65.09
  -5   7   4 1107.39   64.99
  -5   7   4  986.50   64.79
   5   7  -4 1079.19   64.29
  -5   7   4 1097.99   64.99
  -5   7   4 1075.39   64.79
   5   7  -4 1060.79   64.29
  -3  -7   4  115.79    9.10
  -3  -7   4  115.29   10.80
  -3  -7   4  129.69    9.30
  -3  -7   4  133.89    8.90
  -3  -7   4  119.99    9.70
  -3  -7   4  119.69    8.40
  -3  -7   4  106.59    9.00
   3  -7  -4  137.49    9.40
  -3  -7   4  122.39    9.60
   3  -7  -4  128.89    8.70
   3  -7  -4  130.19    8.60
  -3   7   4  132.29   10.50
  -3   7   4  124.79    9.40
  -3   7   4  125.19    8.90
   3   7  -4  115.79    9.70
   1  -7  -4 1167.18   74.89
  -1  -7   4 1190.68   73.99
  -1  -7   4 1139.79   74.49
  -1  -7   4 1175.98   74.19
   1  -7  -4 1205.68   74.19
  -1  -7   4 1163.18   74.19
  -1  -7   4 1242.08   74.79
   1  -7  -4 1161.78   74.29
  -1  -7   4 1216.28   75.59
  -1   7   4 1311.77   75.69
   1   7  -4 1083.89   73.89
  -1   7   4 1182.08   74.59
  -1   7   4 1176.18   74.49
  -1   7   4 1190.38   74.29
   1  -7   4  214.98   15.10
   1  -7   4  199.88   14.10
  -1  -7  -4  238.38   16.10
   1  -7   4  195.48   14.00
   1  -7   4  197.58   14.20
  -1  -7  -4  210.28   14.00
  -1  -7  -4  237.88   15.10
  -1  -7  -4  235.88   14.90
   1   7   4  252.47   16.40
  -1   7  -4  203.48   14.30
   1   7   4  228.58   15.00
  -3  -7  -4 1481.95   93.69
  -3  -7  -4 1490.35   93.49
  -3  -7  -4 1496.05   92.89
  -3  -7  -4 1498.55   92.49
  -3  -7  -4 1486.15   93.59
  -3  -7  -4 1585.84   94.59
  -3  -7  -4 1518.65   92.99
  -3  -7  -4 1535.35   93.39
   3   7   4 1469.45   93.29
   3   7   4 1409.26   92.59
  -3   7  -4 1449.76   93.09
  -3   7  -4 1683.63   93.99
  -3   7  -4 1387.16   93.19
   3   7   4 1376.46   93.79
  -3   7  -4 1440.56   92.69
  -5  -7  -4  212.08   16.20
  -5  -7  -4  254.47   18.20
  -5  -7  -4  242.88   17.80
  -5  -7  -4  229.68   18.10
  -5  -7  -4  268.07   17.70
  -5  -7  -4  235.88   16.90
  -5  -7  -4  252.97   16.90
   5   7   4  269.87   16.30
  -5   7  -4  271.37   18.00
  -5   7  -4  253.37   16.40
  -5   7  -4  253.27   16.50
  -5   7  -4  251.57   17.10
  -5   7  -4  269.97   16.80
   5   7   4  247.38   16.80
  -5   7  -4  263.77   16.60
  -5   7  -4  242.78   16.70
   5   7   4  238.28   16.10
   5   7   4  243.38   19.20
  -5   7  -4  294.97   20.10
   5   7   4  235.18   17.50
   5   7   4  243.98   17.30
  -5   7  -4  271.27   17.10
  -5   7  -4  271.07   16.80
  -5   7  -4  242.78   17.00
  -5   7  -4  244.28   17.20
  -7  -7  -4  114.49    8.50
  -7  -7  -4  125.89   10.80
  -7  -7  -4  112.99    9.70
  -7  -7  -4  105.99    9.70
  -7  -7  -4  113.19    9.00
  -7   7  -4  116.19    8.60
  -7   7  -4  111.39    8.50
   7   7   4  116.39   10.50
   7   7   4  109.69    8.00
  -7   7  -4  110.49    8.80
  -7   7  -4  111.19    8.20
   7   7   4  111.59    9.30
  -7   7  -4  116.89    8.80
   7   7   4   98.99    8.80
  -7   7  -4  113.39    8.40
  -7   7  -4  118.29    8.30
  -7   7  -4  114.59    8.90
  -7   7  -4  113.99    9.50
  -7   7  -4  110.89    8.10
   7   7   4  112.99    7.90
  -7   7  -4  129.19   10.30
  -9  -7  -4   93.49    7.50
  -9  -7  -4   80.09   12.10
  -9  -7  -4   91.29    9.80
  -9  -7  -4  103.49    9.30
  -9  -7  -4   99.69    9.90
  -9  -7  -4  114.29    7.90
   9   7   4  114.39    7.50
   9   7   4  122.29    7.40
  -9   7  -4  118.49    8.40
  -9   7  -4  103.29    7.90
  -9   7  -4  105.39    8.20
  -9   7  -4  123.29    7.80
   9   7   4  127.19    9.30
  -9   7  -4   92.99    8.20
  -9   7  -4  114.29    7.90
  -9   7  -4   93.79    7.70
  -9   7  -4   88.29    9.10
 -11  -7  -4  282.47   17.20
 -11  -7  -4  287.47   18.00
 -11  -7  -4  233.68   17.00
 -11   7  -4  258.77   17.90
 -11   7  -4  247.38   17.20
 -11   7  -4  238.38   17.60
 -11   7  -4  281.87   17.30
  11   7   4  307.37   16.90
 -10  -8   4    3.00    2.40
 -10  -8   4   13.10    6.60
 -10  -8   4    0.00    3.70
 -10   8   4    3.90    1.90
 -10   8   4    4.30    1.80
 -10   8   4    2.70    1.70
  10   8  -4    1.80    1.40
 -10   8   4    5.90    2.80
   8  -8  -4  188.48   12.30
  -8  -8   4  186.58   13.30
  -8  -8   4  170.98   12.80
  -8  -8   4  164.38   12.70
  -8  -8   4  176.38   13.40
  -8   8   4  170.88   12.70
   8   8  -4  175.38   11.70
  -8   8   4  161.78   12.10
  -8   8   4  173.68   14.30
  -8   8   4  194.88   12.30
  -8   8   4  205.08   12.70
   8   8  -4  183.88   11.70
  -8   8   4  178.98   12.50
  -8   8   4  176.18   12.60
  -8   8   4  182.98   12.20
  -8   8   4  168.68   12.90
  -8   8   4  164.08   13.30
   8   8  -4  169.88   12.30
  -6  -8   4   53.19    8.70
  -6  -8   4   49.00    6.00
  -6  -8   4   55.39    4.30
  -6  -8   4   46.40    6.60
   6  -8  -4   46.50    5.60
  -6  -8   4   55.29    5.50
  -6  -8   4   51.49    5.50
  -6   8   4   50.69    4.80
  -6   8   4   51.09    5.00
  -6   8   4   51.29    4.90
  -6   8   4   61.59    6.40
   6   8  -4   49.99    5.10
  -6   8   4   53.59    5.20
  -6   8   4   51.19    5.30
  -6   8   4   46.40    5.30
  -6   8   4   52.29    5.50
   6   8  -4   53.69    4.30
  -6   8   4   54.99    8.20
  -6   8   4   53.49    6.80
   6   8  -4   50.29    4.20
  -6   8   4   56.29    6.00
  -4  -8   4  447.56   30.40
  -4  -8   4  493.35   30.60
   4  -8  -4  525.25   30.40
  -4  -8   4  447.46   29.50
   4  -8  -4  441.86   29.60
   4  -8  -4  497.55   29.80
  -4  -8   4  476.05   31.00
  -4  -8   4  469.05   31.30
  -4  -8   4  513.75   30.20
  -4  -8   4  464.75   29.60
  -4  -8   4  421.96   30.00
  -4   8   4  466.85   30.10
  -4   8   4  451.75   30.10
  -4   8   4  487.25   31.80
  -4   8   4  424.16   31.80
  -4   8   4  466.35   29.90
   4   8  -4  426.96   31.10
  -4   8   4  445.36   29.70
   4   8  -4  451.25   29.80
  -4   8   4  443.96   30.60
   4   8  -4  449.26   29.30
  -4   8   4  499.45   29.90
  -4   8   4  523.45   30.30
  -2  -8   4    1.00    2.20
  -2  -8   4    1.90    2.30
   2  -8  -4    5.90    2.50
  -2  -8   4    2.10    1.30
   2  -8  -4    0.60    2.60
  -2  -8   4    2.00    1.70
   2  -8  -4   -0.80    1.70
  -2  -8   4    0.80    2.90
  -2  -8   4    0.10    1.70
   2  -8  -4    1.00    1.60
  -2  -8   4    1.10    2.40
  -2   8   4   -0.50    2.50
  -2   8   4    4.00    1.90
  -2   8   4    2.20    2.20
  -2   8   4    1.70    1.70
   2   8  -4   -1.60    2.10
  -2   8   4    2.30    2.10
  -2   8   4    4.20    2.10
  -2   8   4   -0.30    2.10
   2   8  -4    1.60    1.40
  -2   8   4    4.30    1.80
   0  -8  -4  337.87   21.20
   0  -8   4  313.57   19.60
   0  -8  -4  304.47   19.20
   0  -8  -4  297.27   20.00
   0  -8   4  310.87   20.20
   0  -8   4  268.57   19.10
   0  -8   4  323.47   21.20
   0  -8  -4  278.97   20.00
   0  -8   4  267.87   19.80
   0  -8   4  286.17   19.40
   0  -8   4  297.47   19.70
   0  -8  -4  310.77   19.80
   0   8   4  325.47   21.50
   0   8  -4  295.07   19.40
   0   8   4  300.47   20.00
   2  -8   4   36.40    3.70
   2  -8   4   36.80    4.20
  -2  -8  -4   36.60    4.00
   2  -8   4   46.40    5.00
  -2  -8  -4   46.50    5.20
   2  -8   4   42.90    4.20
   2  -8   4   39.40    3.60
  -2  -8  -4   38.30    4.70
  -2  -8  -4   46.50    5.00
  -2  -8  -4   47.10    5.00
  -2  -8  -4   42.40    6.40
  -2   8  -4   44.00    4.30
  -2   8  -4   50.69    4.30
  -2   8  -4   37.50    4.50
  -2   8  -4   41.40    4.00
   2   8   4   47.80    5.10
  -2   8  -4   41.30    4.10
  -2   8  -4   43.00    4.50
   2   8   4   42.30    6.60
   2   8   4   48.00    4.10
  -2   8  -4   45.00    5.20
  -2   8  -4   41.50    4.20
  -4  -8  -4  383.06   24.50
  -4  -8  -4  383.76   25.60
  -4  -8  -4  382.16   23.90
  -4  -8  -4  366.96   25.20
  -4  -8  -4  412.16   25.50
  -4  -8  -4  402.66   26.00
  -4  -8  -4  355.86   24.60
  -4   8  -4  369.66   24.80
  -4   8  -4  376.36   24.90
   4   8   4  404.76   25.20
  -4   8  -4  382.36   24.40
  -4   8  -4  336.97   24.40
   4   8   4  383.56   23.80
  -4   8  -4  355.86   24.30
   4   8   4  346.97   23.70
  -4   8  -4  348.57   24.40
  -4   8  -4  358.76   24.00
   4   8   4  387.66   24.40
  -4   8  -4  409.66   24.70
  -4   8  -4  403.26   25.50
  -6  -8  -4   44.70    5.80
  -6  -8  -4   45.10    6.90
  -6  -8  -4   44.90    7.00
  -6  -8  -4   42.00    5.40
  -6   8  -4   47.40    4.80
  -6   8  -4   48.30    6.50
  -6   8  -4   42.30    4.20
   6   8   4   34.90    6.50
  -6   8  -4   41.20    5.00
  -6   8  -4   36.30    4.60
   6   8   4   54.89    5.20
  -6   8  -4   42.50    4.80
  -6   8  -4   40.00    4.20
   6   8   4   40.80    3.70
  -6   8  -4   34.20    7.60
  -6   8  -4   37.30    6.80
   6   8   4   44.60    4.00
  -6   8  -4   49.40    4.70
   6   8   4   51.49    4.30
  -6   8  -4   44.20    5.10
  -6   8  -4   44.50    4.20
   6   8   4   33.30    5.70
  -8  -8  -4   61.89    7.00
  -8  -8  -4   75.19    6.80
  -8  -8  -4   87.69    7.60
  -8  -8  -4   67.39    5.40
  -8  -8  -4   73.59    8.20
   8   8   4   59.99    7.00
  -8   8  -4   62.19    5.90
  -8   8  -4   64.99    5.70
  -8   8  -4   65.09    6.30
  -8   8  -4   58.09    5.40
   8   8   4   82.19    5.50
   8   8   4   81.59    5.30
  -8   8  -4   69.19    5.40
   8   8   4   68.49    6.30
  -8   8  -4   65.09    7.30
  -8   8  -4   63.19    6.30
  -8   8  -4   58.29    6.30
  -8   8  -4   69.29    6.10
 -10  -8  -4   56.09    4.50
 -10  -8  -4   55.69    6.00
 -10  -8  -4   60.09    5.80
 -10   8  -4   46.70    5.40
  10   8   4   61.79    4.20
  10   8   4   55.09    4.30
 -10   8  -4   57.29    5.20
 -10   8  -4   61.79    5.00
 -10   8  -4   59.09    5.00
  -9  -9   4  108.59   10.30
  -9  -9   4  125.59    9.30
  -9  -9   4  112.69    9.70
  -9  -9   4  114.49   10.60
  -9   9   4  123.79   10.40
  -9   9   4  129.69    8.90
  -9   9   4  124.09    8.80
   9   9  -4  145.69    9.40
   9   9  -4  134.39    8.40
  -9   9   4  135.29    8.90
  -7  -9   4   44.70    5.40
  -7  -9   4   49.10    5.50
  -7  -9   4   46.70    5.80
  -7  -9   4   48.40    6.40
  -7   9   4   58.99    4.80
   7   9  -4   46.60    5.00
  -7   9   4   41.80    7.70
  -7   9   4   52.49    6.00
  -7   9   4   54.59    5.10
  -7   9   4   48.00    6.60
  -7   9   4   46.20    5.60
  -7   9   4   51.79    4.60
  -7   9   4   53.99    5.40
   7   9  -4   48.40    4.00
   5  -9  -4  121.09    9.10
  -5  -9   4  107.49    9.60
  -5  -9   4  113.09    9.10
  -5  -9   4  118.49   10.80
  -5  -9   4  107.19    8.40
  -5  -9   4  120.39    9.90
   5  -9  -4  127.79    8.70
  -5  -9   4  113.69    9.40
  -5  -9   4  116.89   10.50
  -5  -9   4  114.39   13.80
  -5  -9   4  127.59    8.40
  -5   9   4  115.09    9.40
   5   9  -4  115.79    8.90
  -5   9   4  116.49   10.40
  -5   9   4  127.99    9.20
  -5   9   4  141.79    9.90
  -5   9   4  129.89   11.00
  -5   9   4  115.49    8.60
   5   9  -4  108.59    8.10
  -5   9   4  129.29   11.80
  -5   9   4  121.59    8.80
  -5   9   4  122.49    9.20
   3  -9  -4  265.97   19.20
   3  -9  -4  285.97   18.40
  -3  -9   4  270.67   21.20
  -3  -9   4  289.97   19.20
  -3  -9   4  300.77   18.70
  -3  -9   4  273.27   18.20
   3  -9  -4  279.27   17.90
  -3  -9   4  273.47   19.00
  -3  -9   4  281.87   18.10
  -3  -9   4  283.37   19.50
   3  -9  -4  284.17   18.40
  -3  -9   4  285.97   19.90
  -3   9   4  283.67   19.40
  -3   9   4  301.17   20.80
   3   9  -4  293.27   18.80
  -3   9   4  309.77   20.40
  -3   9   4  251.67   18.20
   3   9  -4  257.77   18.20
  -3   9   4  275.07   18.40
  -3   9   4  261.47   18.60
   3   9  -4  273.67   18.20
  -3   9   4  276.47   18.20
  -3   9   4  286.67   18.80
  -3   9   4  279.57   18.70
   1  -9  -4  195.38   13.30
  -1  -9   4  203.38   14.00
  -1  -9   4  182.98   15.00
   1  -9  -4  186.58   13.60
  -1  -9   4  185.58   13.20
  -1  -9   4  217.38   13.80
  -1  -9   4  188.38   12.90
  -1  -9   4  197.28   13.30
   1  -9  -4  189.78   13.20
  -1  -9   4  190.78   13.60
   1  -9  -4  186.88   12.50
   1  -9  -4  192.38   14.40
  -1   9   4  186.08   12.90
  -1   9   4  197.38   12.90
  -1   9   4  184.38   12.40
  -1   9   4  180.68   13.10
   1   9  -4  188.78   13.20
   1   9  -4  194.18   12.80
  -1   9   4  194.58   12.70
  -1   9   4  187.68   13.90
   1   9  -4  193.68   13.40
   1   9  -4  166.28   12.50
  -1   9   4  202.18   15.00
   1  -9   4   77.29    7.30
   1  -9   4   96.49    7.50
   1  -9   4   86.69    6.60
   1  -9   4   91.49    8.60
  -1  -9  -4   87.09    7.70
   1  -9   4   87.79    7.00
   1  -9   4   88.19    6.90
  -1  -9  -4   86.59    6.50
  -1  -9  -4   87.49    7.50
  -1  -9  -4  112.09    9.30
   1  -9   4   83.19    6.30
  -1  -9  -4   86.79    9.10
   1   9   4   91.79    6.60
   1   9   4   94.79    7.60
  -1   9  -4   89.89    7.10
  -1   9  -4   95.09    7.00
   1   9   4   93.89    9.40
  -1   9  -4   92.49    7.50
   1   9   4  102.89    7.80
   1   9   4   87.59    6.70
  -1   9  -4   99.89    7.00
  -1   9  -4   97.69    6.90
   3  -9   4  290.07   22.30
  -3  -9  -4  363.46   23.60
   3  -9   4  333.67   23.60
  -3  -9  -4  357.26   23.00
  -3  -9  -4  368.76   23.80
   3  -9   4  345.17   22.80
  -3  -9  -4  370.36   25.30
  -3  -9  -4  365.36   22.40
  -3  -9  -4  370.66   24.20
  -3  -9  -4  364.16   24.00
  -3  -9  -4  381.86   23.20
  -3   9  -4  354.06   22.70
  -3   9  -4  367.16   22.70
  -3   9  -4  303.77   22.30
  -3   9  -4  357.86   23.30
  -3   9  -4  356.36   23.10
   3   9   4  365.76   22.60
  -3   9  -4  385.16   23.90
   3   9   4  364.06   23.50
   3   9   4  325.67   22.00
   3   9   4  304.47   22.80
  -3   9  -4  322.87   22.80
  -3   9  -4  350.26   22.90
  -3   9  -4  355.16   22.90
   3   9   4  339.97   25.30
  -5  -9  -4  123.69   10.90
  -5  -9  -4  131.79    8.00
  -5  -9  -4  113.19    9.90
  -5  -9  -4  121.49   10.90
  -5  -9  -4  122.09    9.10
  -5  -9  -4  112.89    9.20
  -5  -9  -4  124.19   10.40
   5   9   4  116.49    7.90
  -5   9  -4  115.49    9.20
  -5   9  -4  109.19    8.20
  -5   9  -4  120.09    8.80
  -5   9  -4   97.69    8.70
  -5   9  -4  113.19    8.80
  -5   9  -4  106.89    8.40
   5   9   4  116.49   12.00
  -5   9  -4  116.29    9.00
   5   9   4  113.79    7.90
  -5   9  -4  127.09   10.30
   5   9   4  122.39    9.90
  -5   9  -4  115.89    8.50
  -5   9  -4  110.19    9.10
   5   9   4  130.09    8.90
  -5   9  -4  107.99    8.20
  -7  -9  -4  256.27   18.50
  -7  -9  -4  234.98   16.80
  -7  -9  -4  230.58   17.30
  -7  -9  -4  228.88   17.40
  -7   9  -4  274.97   16.60
  -7   9  -4  221.18   16.30
   7   9   4  263.87   16.50
  -7   9  -4  249.58   16.00
  -7   9  -4  257.07   16.40
  -7   9  -4  228.98   16.20
  -7   9  -4  204.48   16.20
   7   9   4  255.87   15.70
   7   9   4  233.18   15.60
  -7   9  -4  221.88   15.90
   7   9   4  238.98   17.80
  -7   9  -4  260.27   17.60
  -7   9  -4  232.98   15.80
  -7   9  -4  268.97   16.10
  -7   9  -4  258.07   17.00
  -9  -9  -4  119.39    8.40
  -9  -9  -4  133.79   10.00
  -9  -9  -4  101.19    9.70
   9   9   4  135.19   10.20
  -9   9  -4  123.89   10.00
  -9   9  -4  125.89    8.90
   9   9   4  118.69    8.40
  -9   9  -4  127.59    8.40
  -9   9  -4  135.39    9.00
  -9   9  -4  107.59    9.70
 -10 -10   4   68.09    5.70
 -10  10   4   61.79    5.50
  10  10  -4   50.19    4.90
  -8 -10   4   62.09    6.60
  -8 -10   4   62.29    6.30
  -8 -10   4   64.09    6.70
  -8  10   4   72.19    5.60
   8  10  -4   79.79    5.90
  -8  10   4   73.39    5.80
  -8  10   4   72.29    5.60
  -8  10   4   72.39    6.70
  -8  10   4   66.89    7.10
  -6 -10   4  369.66   24.80
  -6 -10   4  362.36   23.90
  -6 -10   4  336.47   24.80
  -6 -10   4  409.36   27.40
  -6 -10   4  391.16   26.00
  -6 -10   4  348.07   25.30
   6  10  -4  329.27   23.60
  -6  10   4  398.76   24.60
  -6  10   4  379.56   27.60
  -6  10   4  358.96   24.10
  -6  10   4  381.96   24.50
  -6  10   4  428.66   26.90
  -6  10   4  395.96   24.90
  -6  10   4  383.36   24.70
   6  10  -4  387.36   24.60
  -6  10   4  391.36   25.60
  -6  10   4  386.76   25.10
  -6  10   4  358.96   24.50
   4 -10  -4  285.37   18.00
  -4 -10   4  258.97   18.60
  -4 -10   4  248.48   18.90
   4 -10  -4  250.67   16.50
  -4 -10   4  250.37   17.40
  -4 -10   4  253.27   16.90
   4 -10  -4  273.57   17.20
  -4 -10   4  257.67   18.00
  -4 -10   4  249.28   17.90
  -4 -10   4  232.38   20.60
  -4 -10   4  251.67   16.80
   4 -10  -4  282.07   17.30
  -4  10   4  280.97   19.30
  -4  10   4  250.77   18.30
  -4  10   4  249.38   19.80
  -4  10   4  269.27   17.60
   4  10  -4  241.98   17.00
  -4  10   4  272.67   17.60
   4  10  -4  239.08   17.50
  -4  10   4  258.07   17.30
  -4  10   4  242.78   17.00
  -2 -10   4  121.99    8.40
  -2 -10   4  117.89    9.80
   2 -10  -4  118.79   10.40
  -2 -10   4  108.99    8.80
  -2 -10   4  110.09    9.30
  -2 -10   4  119.99   10.20
   2 -10  -4  126.19    9.10
  -2 -10   4  100.29   11.20
   2 -10  -4  124.79    8.20
  -2 -10   4  120.49    8.20
   2 -10  -4  117.69    9.60
   2 -10  -4  125.59    9.10
  -2 -10   4  113.69    9.20
  -2  10   4  122.19   11.00
  -2  10   4  127.89    8.80
   2  10  -4  121.59    9.20
  -2  10   4  124.69    8.20
  -2  10   4  105.19    8.30
   2  10  -4  106.19    8.30
   2  10  -4  124.49    8.60
  -2  10   4  119.19    8.80
  -2  10   4  127.39    9.20
   0 -10  -4   43.10    5.20
   0 -10   4   43.50    6.90
   0 -10   4   43.10    4.00
   0 -10  -4   48.20    5.50
   0 -10  -4   46.40    4.10
   0 -10  -4   45.70    6.80
   0 -10  -4   46.80    5.40
   0 -10   4   47.30    4.70
   0 -10   4   48.10    4.40
   0 -10   4   45.30    4.90
   0 -10   4   45.70    5.50
   0 -10   4   49.30    5.30
   0  10  -4   46.40    4.50
   0  10   4   47.10    4.50
   0  10  -4   54.79    5.30
   0  10  -4   48.90    4.60
   0  10  -4   50.69    4.60
   0  10   4   43.80    4.00
   0  10   4   47.50    4.80
   0  10   4   49.00    7.10
   0  10  -4   52.99    5.30
   0  10  -4   44.00    3.80
  -2 -10  -4  151.28    9.80
   2 -10   4  132.99   10.10
  -2 -10  -4  154.68   10.80
  -2 -10  -4  149.49   11.20
  -2 -10  -4  143.69   12.90
   2 -10   4  136.89   10.20
   2 -10   4  127.89   11.70
   2 -10   4  137.79   10.60
  -2 -10  -4  156.58   11.50
  -2 -10  -4  161.58   11.90
  -2 -10  -4  170.28   11.50
  -2 -10  -4  161.08   10.60
   2  10   4  135.09   11.00
  -2  10  -4  133.89   10.50
   2  10   4  134.99   10.20
   2  10   4  145.09    9.90
   2  10   4  147.69   13.10
  -2  10  -4  135.49   10.70
  -2  10  -4  145.69   10.20
  -2  10  -4  139.59   10.50
  -2  10  -4  144.39   10.40
  -2  10  -4  132.99    9.80
  -2  10  -4  143.79   10.20
   2  10   4  131.09    9.90
  -4 -10  -4  168.38   13.50
  -4 -10  -4  163.68   16.30
  -4 -10  -4  175.88   14.00
  -4 -10  -4  173.48   12.60
  -4 -10  -4  183.58   12.60
  -4 -10  -4  186.48   11.70
  -4 -10  -4  174.68   13.50
  -4 -10  -4  179.18   13.30
   4  10   4  177.38   11.30
  -4  10  -4  149.29   11.50
  -4  10  -4  182.68   12.10
   4  10   4  172.38   12.10
  -4  10  -4  182.38   12.30
  -4  10  -4  178.78   12.40
   4  10   4  176.78   13.60
  -4  10  -4  190.68   13.60
  -4  10  -4  160.18   12.50
  -4  10  -4  179.18   12.60
  -4  10  -4  184.08   12.80
  -4  10  -4  157.28   11.60
  -4  10  -4  172.58   12.50
   4  10   4  161.18   15.10
  -6 -10  -4   51.29    6.10
  -6 -10  -4   55.29    7.20
  -6 -10  -4   43.70    5.60
  -6 -10  -4   57.39    6.90
  -6 -10  -4   60.79    5.50
   6  10   4   50.59    5.00
  -6  10  -4   46.30    5.00
  -6  10  -4   47.70    5.40
  -6  10  -4   36.20    5.10
  -6  10  -4   47.80    4.40
   6  10   4   51.79    3.90
   6  10   4   52.79    9.40
  -6  10  -4   52.19    6.40
  -6  10  -4   39.90    4.70
   6  10   4   37.80    8.50
  -6  10  -4   38.10    4.70
  -6  10  -4   43.90    4.30
  -6  10  -4   49.10    5.00
  -6  10  -4   43.90    4.10
  -8 -10  -4   24.30    2.90
  -8 -10  -4   21.00    4.80
  -8 -10  -4   19.30    4.00
  -8 -10  -4   23.30    5.70
  -8 -10  -4   26.40    5.40
  -8  10  -4   22.10    4.80
   8  10   4   21.30    3.80
  -8  10  -4   17.80    3.00
  -8  10  -4   24.30    3.60
  -8  10  -4   18.00    3.70
  -8  10  -4   23.50    3.70
  -8  10  -4   15.20    3.50
  -8  10  -4   26.10    4.20
   8  10   4   20.00    2.50
  -9 -11   4   27.70    3.50
  -9  11   4   33.70    4.10
  -9  11   4   39.30    3.20
   9  11  -4   30.10    4.10
  -7 -11   4   14.30    4.80
   7 -11  -4   14.00    3.40
  -7 -11   4   17.50    4.80
  -7 -11   4   14.40    3.70
  -7 -11   4   24.20    6.10
   7  11  -4   18.50    3.00
  -7  11   4   13.20    2.90
  -7  11   4   19.10    4.30
  -7  11   4   15.10    2.70
  -7  11   4   14.20    3.90
  -5 -11   4  124.19   10.50
   5 -11  -4  122.39    9.00
  -5 -11   4  122.59    9.90
  -5 -11   4  129.59   20.00
   5 -11  -4  115.29   10.30
   5 -11  -4  118.49   10.50
  -5 -11   4  121.99    8.70
   5 -11  -4  125.29    8.60
  -5 -11   4  131.09   10.20
  -5 -11   4  125.99    9.60
  -5 -11   4  133.79   12.00
  -5  11   4  127.99    9.30
   5  11  -4  118.79    9.10
  -5  11   4  123.99    9.80
  -5  11   4  123.79    9.40
  -5  11   4  122.79    8.90
  -5  11   4  132.29   12.50
  -3 -11   4    0.10    2.10
   3 -11  -4    5.40    3.70
  -3 -11   4   -0.20    2.30
  -3 -11   4    0.70    3.60
   3 -11  -4    2.90    1.80
   3 -11  -4    3.30    3.20
  -3 -11   4    0.10    3.70
   3 -11  -4    1.20    2.40
  -3 -11   4    0.40    2.70
  -3 -11   4    4.00    1.80
  -3 -11   4   -1.40    2.60
  -3 -11   4    8.00    6.70
  -3  11   4    2.10    1.90
  -3  11   4    5.10    3.40
  -3  11   4   -1.90    5.20
   3  11  -4    2.60    2.30
   3  11  -4    0.70    1.70
  -3  11   4    2.20    2.70
  -3  11   4    1.80    2.50
  -3  11   4    5.00    2.60
   3  11  -4    0.20    1.90
  -1 -11   4   41.30    6.50
   1 -11  -4   43.20    6.10
  -1 -11   4   37.50    4.90
   1 -11  -4   45.70    5.80
   1 -11  -4   49.70    6.10
   1 -11  -4   44.70    4.30
  -1 -11   4   44.80    5.90
  -1 -11   4   41.90    5.40
  -1 -11   4   45.80    4.10
  -1 -11   4   41.70    4.40
  -1 -11   4   49.00    8.40
  -1 -11   4   43.40    5.80
   1 -11  -4   51.79    7.80
   1  11  -4   49.60    5.00
  -1  11   4   53.09    5.30
  -1  11   4   45.60    7.70
  -1  11   4   44.40    4.10
  -1  11   4   58.79    5.30
   1  11  -4   38.30    4.30
  -1  11   4   52.99    4.50
   1  11  -4   47.80    4.70
  -1  11   4   49.40    5.00
   1 -11   4  168.08   14.20
  -1 -11  -4  160.68   12.50
  -1 -11  -4  161.88   12.10
   1 -11   4  156.48   11.60
  -1 -11  -4  146.39   12.40
   1 -11   4  153.48   11.20
  -1 -11  -4  154.28   14.20
  -1 -11  -4  166.68   12.90
  -1 -11  -4  160.88   12.50
   1 -11   4  161.28   12.40
   1 -11   4  162.08   11.80
   1 -11   4  148.49   10.80
  -1 -11  -4  158.98   11.00
   1 -11   4  143.29   12.10
  -1  11  -4  159.88   11.50
  -1  11  -4  166.38   12.00
  -1  11  -4  184.58   12.60
  -1  11  -4  158.48   11.70
   1  11   4  152.78   11.30
   1  11   4  155.38   14.30
   1  11   4  153.98   10.80
  -1  11  -4  175.08   11.90
   1  11   4  155.08   11.50
  -1  11  -4  172.18   11.30
  -3 -11  -4   56.69    6.50
   3 -11   4   56.99    5.30
  -3 -11  -4   48.10    4.70
  -3 -11  -4   62.19   11.70
  -3 -11  -4   46.70    6.00
   3 -11   4   52.09    7.40
  -3 -11  -4   57.89    5.70
  -3 -11  -4   55.99    6.20
  -3 -11  -4   63.69    7.20
  -3 -11  -4   56.59    7.10
   3  11   4   50.69    8.70
   3  11   4   49.70    4.80
  -3  11  -4   51.69    4.70
   3  11   4   46.60    4.70
  -3  11  -4   49.50    5.30
  -3  11  -4   58.29    5.10
  -3  11  -4   55.69    5.80
   3  11   4   50.99    4.90
  -3  11  -4   54.69    5.30
  -3  11  -4   50.29    5.70
   3  11   4   56.79    8.30
  -3  11  -4   55.39    5.60
  -5 -11  -4  231.38   17.70
  -5 -11  -4  251.67   17.60
  -5 -11  -4  229.28   16.40
  -5 -11  -4  229.18   17.00
  -5 -11  -4  228.58   15.10
  -5 -11  -4  213.58   18.80
  -5  11  -4  255.47   15.70
   5  11   4  235.48   15.70
  -5  11  -4  228.78   16.10
  -5  11  -4  252.07   16.50
  -5  11  -4  217.58   15.20
  -5  11  -4  234.48   15.90
  -5  11  -4  253.17   16.40
  -5  11  -4  246.48   16.00
  -5  11  -4  203.58   15.40
  -7 -11  -4   13.10    3.80
  -7 -11  -4   11.10    3.90
  -7 -11  -4    7.00    3.70
  -7 -11  -4    9.90    3.40
  -7  11  -4    8.60    2.90
   7  11   4   13.70    2.60
  -7  11  -4   12.80    2.80
  -7  11  -4    9.70    2.80
  -7  11  -4   15.40    3.90
  -7  11  -4   12.60    2.80
  -9 -11  -4   58.69    5.80
   9  11   4   51.89    4.40
   8  12  -4  152.48   10.40
  -8  12   4  148.59   11.10
  -8  12   4  163.78   10.20
  -8  12   4  142.79   10.10
  -6 -12   4    8.30    2.20
  -6 -12   4    7.00    3.90
  -6 -12   4    5.00    3.60
  -6 -12   4    3.20    3.50
   6 -12  -4    2.50    2.60
  -6  12   4    6.30    3.20
  -6  12   4    8.40    2.00
   6  12  -4    3.40    2.10
  -6  12   4    3.90    2.40
  -6  12   4    2.60    3.00
   6  12  -4    6.40    2.20
  -4 -12   4  279.17   19.80
  -4 -12   4  264.37   18.70
  -4 -12   4  280.67   18.20
   4 -12  -4  287.87   17.90
   4 -12  -4  251.07   19.20
  -4 -12   4  278.47   19.30
  -4 -12   4  292.47   19.40
  -4 -12   4  298.37   29.90
  -4 -12   4  287.97   21.40
   4 -12  -4  270.87   18.40
  -4  12   4  284.87   19.00
   4  12  -4  264.07   18.40
   4  12  -4  302.77   18.50
   4  12  -4  276.17   18.30
  -4  12   4  282.67   23.90
  -4  12   4  273.87   18.70
  -4  12   4  260.87   18.10
  -4  12   4  287.17   18.60
  -2 -12   4   22.70    4.00
  -2 -12   4   27.90    3.10
   2 -12  -4   32.00    6.00
  -2 -12   4   21.00    4.90
  -2 -12   4   22.10    3.40
   2 -12  -4   20.00    3.20
  -2 -12   4   27.30    5.30
  -2 -12   4   27.90    4.80
   2 -12  -4   21.60    4.40
   2 -12  -4   26.70    4.80
   2 -12  -4   27.30    4.70
  -2 -12   4   26.90    4.70
  -2 -12   4   36.10    7.60
  -2  12   4   24.20    4.00
  -2  12   4   24.90    6.10
  -2  12   4   32.60    5.00
   2  12  -4   31.50    3.60
  -2  12   4   25.20    3.90
   2  12  -4   29.00    3.80
   2  12  -4   29.80    4.30
  -2  12   4   32.90    4.30
  -2  12   4   27.90    3.00
   2  12  -4   24.20    3.30
   0 -12   4 1124.49   68.89
   0 -12  -4 1110.69   67.89
   0 -12   4 1119.99   67.19
   0 -12   4 1175.88   68.29
   0 -12  -4 1098.09   68.39
   0 -12   4 1015.40   67.39
   0 -12   4  934.81   67.89
   0 -12  -4 1113.19   67.09
   0 -12  -4 1044.00   68.29
   0 -12   4 1076.99   70.39
   0 -12   4 1024.60   67.79
   0 -12  -4 1106.49   68.49
   0 -12  -4 1081.59   68.79
   0 -12   4  949.11   66.99
   0 -12  -4 1038.80   69.59
   0  12  -4 1107.39   66.79
   0  12   4 1060.89   66.89
   0  12   4 1021.00   69.89
   0  12  -4  944.41   67.39
   0  12  -4 1119.39   68.09
   0  12  -4 1142.49   67.29
   0  12   4 1117.29   67.39
   0  12   4 1038.50   67.69
   0  12  -4 1120.09   67.59
   0  12   4 1065.39   67.49
   0  12  -4 1121.69   67.49
  -2 -12  -4   53.09    6.30
  -2 -12  -4   58.09    7.10
   2 -12   4   54.89    4.30
  -2 -12  -4   53.59    5.40
  -2 -12  -4   48.70    5.80
  -2 -12  -4   46.50    4.70
   2 -12   4   35.20    5.70
   2 -12   4   56.69    7.60
   2 -12   4   55.69    5.50
  -2 -12  -4   57.49    6.90
   2 -12   4   46.10    5.90
  -2 -12  -4   46.00    9.00
  -2 -12  -4   49.10    6.00
   2  12   4   48.20    4.70
   2  12   4   49.99    4.70
   2  12   4   48.20    4.50
  -2  12  -4   51.89    5.40
  -2  12  -4   52.39    5.10
  -2  12  -4   52.89    5.70
  -2  12  -4   45.60    5.40
  -2  12  -4   45.10    5.10
   2  12   4   49.60    8.70
  -2  12  -4   51.39    4.50
   4 -12   4  503.95   32.40
  -4 -12  -4  497.55   32.60
  -4 -12  -4  485.35   33.40
  -4 -12  -4  488.05   31.80
  -4 -12  -4  533.55   33.80
  -4 -12  -4  556.34   39.20
  -4 -12  -4  505.45   32.80
  -4 -12  -4  516.15   34.30
   4  12   4  470.05   32.00
  -4  12  -4  544.35   32.50
  -4  12  -4  507.45   32.30
  -4  12  -4  491.45   31.80
  -4  12  -4  496.95   32.50
  -4  12  -4  507.35   32.80
   4  12   4  508.05   32.10
   4  12   4  432.06   35.70
  -4  12  -4  497.25   32.70
  -4  12  -4  525.35   33.00
  -6 -12  -4    5.40    4.00
  -6 -12  -4    1.30    3.00
  -6 -12  -4    7.10    2.80
  -6 -12  -4    9.10    3.60
  -6  12  -4    4.60    2.70
  -6  12  -4    7.40    2.50
   6  12   4    5.00    2.10
  -6  12  -4    7.00    3.10
  -6  12  -4    4.80    2.00
  -6  12  -4    4.50    2.30
  -6  12  -4    7.30    2.80
   8  12   4  155.98   10.50
   7  13  -4  232.28   15.60
  -7  13   4  232.28   15.60
  -7  13   4  260.37   15.60
   7  13  -4  242.38   15.70
  -7  13   4  232.28   16.20
  -7  13   4  246.98   16.70
  -5 -13   4   22.10    2.90
  -5  13   4   25.90    2.90
  -5  13   4   22.70    4.40
  -5  13   4   27.00    3.90
   3 -13  -4  216.88   15.90
  -3 -13   4  208.38   15.40
  -3 -13   4  207.58   17.20
  -3 -13   4  199.98   14.80
  -3 -13   4  224.68   15.70
  -3 -13   4  192.38   15.80
   3 -13  -4  217.48   14.20
  -3 -13   4  221.28   14.40
   3 -13  -4  178.58   17.40
   3 -13  -4  215.18   14.90
  -3  13   4  225.58   14.80
   3  13  -4  217.78   14.80
  -3  13   4  249.18   16.40
  -3  13   4  202.18   14.10
   3  13  -4  221.28   14.70
  -3  13   4  214.88   15.00
  -3  13   4  224.38   15.00
   3  13  -4  235.38   14.40
  -1 -13   4   69.39   11.90
  -1 -13   4   62.29    6.60
  -1 -13   4   72.19    5.50
  -1 -13   4   69.09    7.10
   1 -13  -4   68.09    9.00
  -1 -13   4   67.99    5.80
   1 -13  -4   89.39    7.20
  -1 -13   4   78.79    6.40
  -1 -13   4   61.79    7.20
   1 -13  -4   89.59    7.50
  -1 -13   4   61.39    7.80
   1 -13  -4   81.79    7.40
  -1  13   4   57.69   10.90
  -1  13   4   60.59    7.20
   1  13  -4   66.79    5.30
  -1  13   4   79.09    6.30
   1  13  -4   69.29    6.30
  -1  13   4   83.49    6.30
   1  13  -4   69.69    6.60
   1  13  -4   75.69    5.90
   1 -13   4  352.46   28.50
  -1 -13  -4  383.26   24.70
   1 -13   4  348.97   26.00
  -1 -13  -4  375.36   25.40
   1 -13   4  388.26   24.90
  -1 -13  -4  374.16   25.20
  -1 -13  -4  373.46   24.70
  -1 -13  -4  393.86   23.90
  -1 -13  -4  372.76   25.30
   1 -13   4  384.36   23.90
  -1 -13  -4  396.46   26.00
   1 -13   4  338.97   24.10
  -1 -13  -4  395.66   31.90
   1  13   4  346.17   24.20
  -1  13  -4  367.26   23.90
  -1  13  -4  343.87   24.20
   1  13   4  367.36   23.70
   1  13   4  381.06   24.10
  -1  13  -4  368.96   24.80
  -1  13  -4  384.16   24.50
  -1  13  -4  374.26   24.20
   1  13   4  355.56   24.10
  -3 -13  -4   67.79    7.50
   3 -13   4   60.99    4.90
  -3 -13  -4   64.49    6.40
  -3 -13  -4   62.99    5.20
   3 -13   4   60.49    5.90
  -3 -13  -4   55.29    7.30
  -3 -13  -4   60.39    5.90
  -3 -13  -4   64.59    6.70
  -3  13  -4   56.19    5.80
  -3  13  -4   63.99    6.10
  -3  13  -4   52.79    6.00
  -3  13  -4   70.79    5.00
   3  13   4   55.09    5.10
   3  13   4   57.69    5.20
  -3  13  -4   59.49    5.40
  -5 -13  -4  251.87   17.30
  -5 -13  -4  241.38   18.10
  -5 -13  -4  224.68   17.30
  -5 -13  -4  226.38   16.90
  -5 -13  -4  230.58   16.00
   5  13   4  252.97   16.20
  -5  13  -4  264.07   17.00
  -5  13  -4  251.77   16.30
  -5  13  -4  264.77   16.80
  -5  13  -4  256.77   16.90
   7  13   4   24.10    3.00
  -6  14   4  257.47   15.10
  -6  14   4  236.98   15.20
  -6  14   4  234.38   15.70
  -6  14   4  213.58   15.60
   6  14  -4  220.58   15.10
   4 -14  -4    8.70    6.00
  -4 -14   4   -0.30    2.50
   4 -14  -4    4.40    3.80
   4 -14  -4    0.50    2.10
  -4 -14   4    3.60    3.30
   4 -14  -4    2.10    1.60
   4 -14  -4   -2.10    2.40
  -4 -14   4    1.90    2.60
  -4  14   4   -0.10    2.20
  -4  14   4    0.70    1.30
   4  14  -4    3.10    2.20
   4  14  -4    0.40    1.70
  -4  14   4    2.50    2.60
  -4  14   4    1.40    2.90
  -2 -14   4   32.30    5.30
  -2 -14   4   42.20    5.20
  -2 -14   4   29.30    5.90
  -2 -14   4   48.20    4.80
  -2 -14   4   38.80    4.70
   2  14  -4   36.50    3.60
   2  14  -4   48.70    4.60
  -2  14   4   35.20    5.00
   2  14  -4   45.00    4.60
   0 -14  -4   23.50    4.40
   0 -14  -4   26.10    3.70
   0 -14   4   26.90    4.80
   0 -14  -4   23.40    3.90
   0 -14  -4   33.30    6.10
   0 -14   4   27.60    4.40
   0 -14  -4   30.60    4.60
   0  14   4   24.10    3.70
   0  14   4   20.30    3.60
   0  14  -4   23.30    3.20
   0  14  -4   20.80    3.10
   0  14   4   22.10    4.30
   0  14   4   18.00    3.30
   0  14  -4   24.10    4.00
   0  14  -4   24.00    4.00
  -2 -14  -4  335.37   21.60
   2 -14   4  297.47   20.60
  -2 -14  -4  370.36   22.70
   2 -14   4  287.57   19.70
  -2 -14  -4  340.57   20.00
  -2  14  -4  290.77   19.60
   2  14   4  302.27   19.60
  -2  14  -4  265.97   20.10
  -2  14  -4  299.47   20.60
  -2  14  -4  301.17   20.10
   2  14   4  308.27   20.00
   2  14   4  299.77   20.00
  -2  14  -4  300.27   20.40
  -4 -14  -4    5.00    2.70
   4 -14   4    6.70    2.40
  -4 -14  -4    3.40    3.00
  -4 -14  -4    5.60    1.70
  -4 -14  -4    7.40    3.70
   4  14   4    7.10    2.00
  -4  14  -4   10.70    2.80
  -4  14  -4    7.50    3.10
  -4  14  -4    7.60    2.50
  -4  14  -4    6.30    1.80
  -6  14  -4   66.49    6.10
  -6  14  -4   79.89    5.90
   5  15  -4   32.70    3.00
   5  15  -4   26.20    3.40
  -5  15   4   40.60    4.10
  -3 -15   4   56.39    5.30
   3 -15  -4   58.19    7.00
   3 -15  -4   63.19    5.10
  -3 -15   4   51.39    7.80
  -3 -15   4   57.59    4.60
  -3  15   4   45.30    6.00
   3  15  -4   56.59    4.70
   3  15  -4   59.89    4.30
  -3  15   4   55.79    5.60
   3  15  -4   60.09    4.70
  -3  15   4   51.89    6.90
   1 -15  -4   24.40    3.90
   1 -15  -4   30.10    4.50
  -1 -15   4   24.40    5.80
   1 -15  -4   27.30    4.50
  -1 -15   4   16.30    3.60
  -1 -15   4   18.20    2.90
   1  15  -4   18.70    3.50
   1  15  -4   21.60    3.00
  -1  15   4   22.90    3.50
   1  15  -4   27.30    3.80
  -1  15   4   20.10    3.50
  -1  15   4   25.40    3.80
  -1 -15  -4   71.99    6.40
  -1 -15  -4   66.59    6.00
  -1 -15  -4   66.69    7.10
   1 -15   4   57.89    6.00
  -1 -15  -4   61.39    6.40
  -1 -15  -4   73.29    5.30
   1 -15   4   62.79    5.10
   1  15   4   51.89    5.60
  -1  15  -4   66.49    5.90
   1  15   4   63.99    5.40
  -1  15  -4   64.89    5.20
  -1  15  -4   59.49    4.80
   1  15   4   69.29    6.80
  -1  15  -4   66.09    5.90
  -3 -15  -4  143.59   12.10
   3 -15   4  124.79    8.50
  -3 -15  -4  133.39   10.10
  -3 -15  -4  131.89    8.50
   3  15   4  126.19    8.80
  -3  15  -4  122.09    9.30
   3  15   4  107.19    8.70
   3  15   4  112.09    9.70
  -3  15  -4  135.29    9.60
   5  15   4  196.68   12.50
   5  15   4  199.48   12.50
  -5  15  -4  184.28   12.60
  -5  15  -4  190.58   12.90
   2 -16  -4    3.80    2.20
  -2 -16   4    1.10    1.40
   2 -16  -4    3.10    1.50
   2  16  -4    3.10    1.80
  -2  16   4    2.60    2.10
   2  16  -4    4.30    1.70
  -2  16   4    2.90    2.00
   2  16  -4    3.70    1.90
   0 -16   4    0.10    1.50
   0 -16   4    3.40    3.00
   0 -16  -4   11.70    4.60
   0  16   4    5.10    2.20
   0  16   4    3.00    2.00
   0  16  -4    0.30    1.20
   0  16  -4    2.70    2.00
   0  16  -4    2.80    2.40
  -2 -16  -4    0.80    1.60
   2 -16   4    2.90    1.10
  -2  16  -4    1.10    2.20
   2  16   4    3.70    1.80
  -2  16  -4    3.30    2.00
   2  16   4    0.40    1.70
  12   0  -5    3.40    1.60
 -12   0   5    4.00    1.60
 -12   0   5    1.10    1.80
 -12   0   5    4.60    2.20
  12   0  -5    0.60    1.20
  12   0  -5    2.50    2.10
  12   0  -5    2.80    1.50
 -10   0   5    0.50    2.90
  10   0  -5    3.40    3.90
 -10   0   5    1.30    2.60
 -10   0   5    3.80    3.20
  10   0  -5    2.60    2.90
 -10   0   5    0.30    2.50
 -10   0   5    2.10    2.50
  10   0  -5    2.70    1.90
  10   0  -5   -0.40    5.60
 -10   0   5    1.40    3.10
 -10   0   5    2.50    2.40
  10   0  -5    3.10    1.70
  10   0  -5    1.50    2.00
  -8   0   5   45.30    4.40
   8   0  -5   45.70    6.50
  -8   0   5   62.09    6.20
  -6   0   5   12.80    2.10
   6   0  -5    7.70    1.70
  -6   0   5    6.80    2.60
  -6   0   5    6.60    2.50
   6   0  -5    7.60    2.20
   6   0  -5   10.40    2.90
   6   0  -5    6.90    3.30
  -6   0   5   10.60    3.50
  -6   0   5    6.00    2.00
  -4   0   5  114.79    8.90
  -4   0   5  133.59    9.50
  -2   0   5   12.60    1.90
  -2   0   5   13.70    2.50
   2   0  -5   19.70    3.50
   2   0  -5   17.60    2.80
   2   0  -5   12.50    2.00
  -2   0   5   15.10    2.70
  -2   0   5   11.20    2.10
   0   0  -5   19.70    3.10
   0   0  -5   14.80    5.50
   2   0   5   10.20    2.00
  -2   0  -5   14.40    2.40
   2   0   5   10.20    1.70
   2   0   5   14.60    3.10
   4   0   5  105.89    7.80
  -6   0  -5    1.40    1.30
  -6   0  -5    8.60    3.80
  -6   0  -5   -0.40    2.20
  -6   0  -5    2.60    3.00
   6   0   5   -0.30    2.00
  -6   0  -5    2.20    2.50
   6   0   5    0.00    1.50
  -6   0  -5    1.70    2.30
   6   0   5   -1.20    4.50
  -6   0  -5    1.60    1.90
   6   0   5    0.10    1.70
  -8   0  -5   60.79    6.70
  -8   0  -5   59.29    5.90
  10   0   5    4.10    2.00
 -10   0  -5    4.90    2.40
 -10   0  -5    5.00    3.60
  10   0   5    4.50    2.30
  10   0   5    5.00    1.70
  10   0   5    1.20    3.00
 -10   0  -5    2.90    3.70
 -10   0  -5    6.70    3.00
  10   0   5    2.90    2.70
 -12   0  -5   21.90    2.60
 -12   0  -5   20.70    2.90
 -11  -1   5   30.90    3.90
  11  -1  -5   36.40    3.30
  11  -1  -5   28.50    3.60
 -11  -1   5   33.90    4.10
 -11  -1   5   26.70    4.20
  11  -1  -5   36.90    4.90
 -11  -1   5   24.60    4.20
  11  -1  -5   32.70    3.70
 -11  -1   5   32.70    4.60
 -11  -1   5   29.00    3.70
 -11   1   5   32.90    3.60
  11   1  -5   29.40    3.20
 -11   1   5   29.20    4.60
 -11   1   5   24.80    4.10
 -11   1   5   30.00    4.60
  11   1  -5   37.00    3.50
  11   1  -5   27.10    4.50
 -11   1   5   27.10    4.10
 -11   1   5   39.30    4.40
  11   1  -5   30.80    3.70
   9  -1  -5  557.74   34.90
   9  -1  -5  485.15   37.20
  -9  -1   5  540.95   35.90
   9  -1  -5  549.74   34.20
   9  -1  -5  544.65   34.20
  -9  -1   5  607.64   35.40
  -9  -1   5  521.85   34.80
  -9  -1   5  509.15   35.10
   9  -1  -5  599.84   36.20
  -9  -1   5  535.85   36.30
  -9  -1   5  498.95   35.20
   9   1  -5  545.65   35.00
  -9   1   5  509.15   36.40
   9   1  -5  575.04   34.30
  -9   1   5  545.05   35.40
   9   1  -5  576.44   34.20
  -9   1   5  491.75   34.10
  -9   1   5  493.45   34.80
  -9   1   5  480.25   34.90
   9   1  -5  534.45   36.30
  -9   1   5  534.15   35.10
  -9   1   5  544.85   35.70
   9   1  -5  569.84   34.30
  -9   1   5  610.04   35.40
  -7  -1   5   28.90    4.80
  -7  -1   5   35.50    4.50
  -7  -1   5   27.90    3.40
  -7  -1   5   38.90    5.30
   7  -1  -5   29.20    3.20
   7  -1  -5   29.30    5.90
  -7  -1   5   27.40    4.10
   7  -1  -5   37.40    4.90
   7  -1  -5   31.10    4.00
  -7  -1   5   29.00    3.80
   7  -1  -5   27.00    3.80
  -7   1   5   34.90    4.30
  -7   1   5   29.90    3.80
  -7   1   5   32.90    3.70
  -7   1   5   29.80    3.10
  -7   1   5   32.20    4.20
  -7   1   5   36.60    4.80
   7   1  -5   36.20    4.20
   7   1  -5   26.80    3.20
   7   1  -5   36.00    5.20
   7   1  -5   33.60    3.20
  -7   1   5   35.60    5.40
  -7   1   5   29.00    5.00
   7   1  -5   22.40    5.70
  -5  -1   5  540.65   34.80
  -5  -1   5  549.25   34.60
   5  -1  -5  533.45   35.20
  -5  -1   5  585.84   34.60
   5  -1  -5  468.95   33.70
  -5  -1   5  534.85   34.50
   5  -1  -5  535.85   34.00
   5  -1  -5  568.44   34.70
   5   1  -5  574.44   34.90
   5   1  -5  516.85   34.20
  -5   1   5  579.14   34.60
  -5   1   5  549.95   35.70
   5   1  -5  480.65   33.80
  -5   1   5  573.14   34.90
   5   1  -5  519.05   35.50
  -5   1   5  545.15   34.40
  -3  -1   5  228.28   14.50
   3  -1  -5  209.38   14.00
  -3  -1   5  203.38   14.50
  -3  -1   5  242.48   15.00
  -3  -1   5  214.58   14.50
  -3  -1   5  219.68   14.20
  -3  -1   5  212.28   14.30
   3  -1  -5  243.38   14.90
  -3  -1   5  205.88   15.70
   3  -1  -5  230.38   14.40
  -3  -1   5  209.08   14.20
   3   1  -5  225.88   15.20
   3   1  -5  241.38   14.70
  -3   1   5  208.18   14.20
  -3   1   5  218.88   14.60
  -3   1   5  212.48   14.20
   3   1  -5  206.68   14.10
  -3   1   5  220.88   15.10
  -3   1   5  212.38   14.30
  -1  -1   5  852.21   50.89
   1  -1  -5  813.62   50.29
  -1  -1   5  839.12   50.39
   1  -1  -5  811.72   50.59
  -1  -1   5  778.22   50.39
  -1   1   5  839.92   50.59
  -1   1   5  895.61   50.99
  -1   1   5  795.92   50.69
  -1   1   5  793.92   50.19
   1   1  -5  772.42   50.79
  -1   1   5  741.23   50.29
   1   1  -5  793.62   50.49
  -1   1   5  749.53   50.19
  -1  -1  -5  149.39   11.50
  -1  -1  -5  188.08   11.40
   1  -1   5  160.68   11.50
   1  -1   5  177.48   11.20
   1   1   5  159.48   11.70
   1   1   5  189.08   11.50
  -1   1  -5  187.98   11.40
  -3  -1  -5 2007.30  141.79
   3  -1   5 2499.15  141.99
  -3  -1  -5 2337.37  141.89
  -3  -1  -5 2243.68  141.49
   3  -1   5 2240.38  141.69
   3   1   5 2404.66  142.19
   3   1   5 2472.15  141.79
  -3   1  -5 2040.80  141.59
  -5  -1  -5   91.89    7.10
   5  -1   5   90.69    7.20
  -5  -1  -5   77.99    6.30
   5  -1   5   83.69    6.40
   5  -1   5   76.99    6.60
  -5  -1  -5   68.29    6.70
   5   1   5   84.19    6.60
   5   1   5   87.59    7.60
   5   1   5   84.99    5.80
  -5   1  -5   79.99    6.40
  -5   1  -5   67.99    6.00
   5   1   5   84.79    6.10
  -7  -1  -5  575.84   40.00
  -7  -1  -5  638.54   39.60
   7  -1   5  635.14   39.20
  -7  -1  -5  604.44   39.90
   7  -1   5  657.43   41.10
  -7  -1  -5  665.33   39.90
  -7  -1  -5  640.54   39.70
  -7  -1  -5  624.24   39.70
   7  -1   5  627.54   39.60
   7  -1   5  639.74   40.30
  -7  -1  -5  602.04   40.50
  -7   1  -5  594.14   40.30
  -7   1  -5  610.94   39.70
   7   1   5  621.44   39.40
   7   1   5  640.94   40.30
   7   1   5  591.24   39.60
   7   1   5  618.54   39.20
  -7   1  -5  639.44   39.90
  -7   1  -5  571.14   40.00
  -7   1  -5  708.03   41.50
   7   1   5  617.94   41.30
  -7   1  -5  605.44   39.50
  -7   1  -5  675.03   39.70
   7   1   5  571.84   39.40
   9  -1   5   53.29    4.50
  -9  -1  -5   54.09    5.10
   9  -1   5   42.30    5.70
  -9  -1  -5   44.80    6.90
  -9  -1  -5   52.19    5.00
  -9  -1  -5   48.30    6.40
  -9  -1  -5   51.69    5.60
   9  -1   5   50.39    7.80
   9  -1   5   50.39    4.30
   9  -1   5   59.99    6.60
   9  -1   5   54.29    4.50
  -9  -1  -5   50.39    5.10
  -9  -1  -5   45.50    4.90
   9   1   5   57.89    6.00
  -9   1  -5   46.30    5.80
  -9   1  -5   44.60    6.90
  -9   1  -5   52.79    5.00
   9   1   5   59.29    8.30
  -9   1  -5   60.79    5.30
   9   1   5   50.89    4.30
  -9   1  -5   50.09    4.90
   9   1   5   49.80    4.50
  -9   1  -5   46.30    5.00
  -9   1  -5   53.59    5.60
  -9   1  -5   51.49    5.60
   9   1   5   52.99    4.70
  11  -1   5  356.06   22.40
  11  -1   5  344.97   21.80
 -11  -1  -5  305.07   23.40
  11  -1   5  350.56   21.60
 -11  -1  -5  334.97   22.00
 -11  -1  -5  343.97   22.00
 -11  -1  -5  357.46   23.40
  11  -1   5  341.47   21.80
 -11  -1  -5  309.87   22.00
  11   1   5  355.26   22.50
 -11   1  -5  336.67   23.30
  11   1   5  350.66   21.90
 -11   1  -5  350.56   22.10
 -11   1  -5  327.67   22.50
  11   1   5  353.26   21.70
  11   1   5  341.77   21.80
 -12  -2   5    1.70    2.30
 -12  -2   5    4.60    2.10
 -12  -2   5    3.60    1.70
  12  -2  -5    3.70    1.20
  12  -2  -5    2.60    1.60
  12  -2  -5    0.60    1.50
 -12   2   5    4.00    1.60
  12   2  -5    4.90    1.40
  12   2  -5    0.70    1.40
  12   2  -5    3.40    1.60
 -12   2   5    3.90    2.10
 -12   2   5    3.30    1.80
  10  -2  -5  397.26   23.40
 -10  -2   5  373.26   24.40
 -10  -2   5  377.86   23.80
 -10  -2   5  346.27   24.80
  10  -2  -5  387.86   23.30
 -10  -2   5  362.36   24.50
 -10  -2   5  332.67   24.00
  10  -2  -5  379.06   24.30
 -10  -2   5  384.76   24.20
 -10   2   5  374.26   24.20
 -10   2   5  310.97   23.80
 -10   2   5  364.46   24.30
 -10   2   5  366.26   24.00
  10   2  -5  416.76   27.60
  10   2  -5  379.06   23.40
 -10   2   5  318.37   23.20
  10   2  -5  375.56   23.50
  10   2  -5  366.26   24.30
 -10   2   5  334.27   24.00
 -10   2   5  345.07   24.70
 -10   2   5  334.67   25.30
 -10   2   5  368.26   23.50
  10   2  -5  390.66   23.40
   8  -2  -5   59.99    8.80
  -8  -2   5   70.69    7.10
   8  -2  -5   59.29    6.40
  -8  -2   5   66.49    6.60
  -8  -2   5   70.69    7.60
   8  -2  -5   57.49    5.40
   8  -2  -5   66.29    7.30
   8  -2  -5   54.99    5.60
  -8  -2   5   57.29    7.90
  -8   2   5   56.69    6.10
  -8   2   5   67.89    6.80
  -8   2   5   72.79    7.00
  -8   2   5   75.29    7.50
  -8   2   5   71.89    6.70
  -8   2   5   75.19    6.00
   8   2  -5   68.49    5.60
   8   2  -5   74.49    5.50
  -8   2   5   65.89    6.60
   8   2  -5   61.89    7.80
   8   2  -5   69.99    6.80
   8   2  -5   74.89   11.40
  -8   2   5   71.09    7.90
   8   2  -5   66.59    5.60
   6  -2  -5  128.99    9.20
  -6  -2   5  129.09    8.90
  -6  -2   5  129.89    9.10
  -6  -2   5  119.59    9.50
   6  -2  -5  108.39    8.20
  -6  -2   5  116.89    8.90
  -6  -2   5   99.39    8.10
   6  -2  -5  111.99    7.90
   6   2  -5  117.79    8.10
   6   2  -5  121.59   10.80
  -6   2   5  118.29   10.00
  -6   2   5  119.79   10.50
  -6   2   5  137.49    8.60
  -6   2   5  101.79    7.80
  -6   2   5  119.69    8.80
   6   2  -5  114.59    8.60
  -6   2   5  120.79    9.00
  -6   2   5  141.39    9.70
   6   2  -5  115.19    9.40
  -4  -2   5   51.39    5.80
  -4  -2   5   50.09    4.80
   4  -2  -5   58.39    5.50
   4  -2  -5   48.20    3.90
  -4  -2   5   53.29    4.60
   4  -2  -5   48.10    4.60
  -4  -2   5   50.79    5.10
  -4  -2   5   50.89    4.80
  -4  -2   5   48.10    4.50
  -4   2   5   44.30    5.00
  -4   2   5   52.69    5.80
   4   2  -5   46.60    4.40
   4   2  -5   42.30    3.70
   4   2  -5   53.99    6.10
   4   2  -5   45.90    5.00
  -4   2   5   44.20    4.30
  -4   2   5   53.29    4.60
  -2  -2   5 1067.79   71.89
  -2  -2   5 1061.79   71.89
  -2  -2   5 1108.39   72.09
  -2  -2   5 1094.39   72.09
   2  -2  -5 1309.47   72.39
   2  -2  -5 1184.58   71.99
  -2  -2   5 1171.58   72.89
  -2  -2   5  983.20   72.09
  -2  -2   5 1191.18   72.19
  -2   2   5 1203.38   72.19
  -2   2   5 1230.48   72.69
   2   2  -5 1187.68   72.39
  -2   2   5 1169.18   71.99
   2   2  -5 1197.68   72.89
  -2   2   5 1222.18   72.09
   2   2  -5 1122.69   71.99
   0  -2  -5  526.55   37.70
   0  -2   5  578.84   37.70
   0  -2  -5  591.84   37.80
   0  -2  -5  651.23   38.20
   0  -2   5  696.33   38.30
   0   2  -5  583.14   37.90
   0   2   5  614.04   38.10
   0   2   5  535.25   37.80
   0   2  -5  588.24   38.20
   0   2   5  644.74   38.30
   0   2   5  685.73   38.50
   0   2   5  552.24   37.70
   2  -2   5 3407.26  216.18
  -2  -2  -5 3708.23  216.58
   2  -2   5 3578.04  216.38
  -2  -2  -5 3382.56  216.28
  -2  -2  -5 3148.49  216.48
   2   2   5 3551.74  216.78
   2   2   5 3322.37  216.08
   2   2   5 3811.52  216.38
   4  -2   5  296.47   17.30
  -4  -2  -5  260.17   16.80
  -4  -2  -5  222.88   16.50
  -4  -2  -5  219.38   17.00
  -4  -2  -5  274.97   17.50
  -4  -2  -5  242.48   16.80
   4  -2   5  245.68   16.90
   4  -2   5  274.07   16.50
   4   2   5  272.07   16.40
   4   2   5  271.47   17.00
  -4   2  -5  232.78   16.70
   4   2   5  287.47   18.00
  -6  -2  -5  677.53   48.00
  -6  -2  -5  751.52   48.90
   6  -2   5  863.61   49.30
  -6  -2  -5  723.83   48.60
  -6  -2  -5  663.43   47.90
  -6  -2  -5  681.13   48.60
   6  -2   5  743.33   47.70
  -6  -2  -5  780.12   48.70
  -6   2  -5  686.03   48.20
  -6   2  -5  769.22   47.80
  -6   2  -5  803.32   48.30
   6   2   5  761.32   49.40
  -6   2  -5  765.32   48.40
  -6   2  -5  827.12   49.20
   6   2   5  711.93   47.90
  -6   2  -5  800.32   48.10
   6   2   5  757.72   48.40
  -6   2  -5  787.12   49.30
  -6   2  -5  884.81   49.80
  -8  -2  -5   81.79    8.50
  -8  -2  -5   71.29    7.30
   8  -2   5   89.49    7.70
  -8  -2  -5   85.29    6.70
  -8  -2  -5   74.29    8.00
  -8  -2  -5   76.69    6.60
  -8  -2  -5   85.59    6.80
   8  -2   5   79.29    6.60
   8  -2   5   88.79    6.10
  -8  -2  -5   77.39    6.90
  -8  -2  -5   84.59    9.00
  -8   2  -5   64.09    7.20
  -8   2  -5   87.79    6.80
   8   2   5   83.59    6.00
   8   2   5   80.59    6.30
   8   2   5   80.59    6.20
  -8   2  -5   81.49    6.70
  -8   2  -5   88.19    6.70
  -8   2  -5   87.79    7.00
  -8   2  -5   77.79    7.10
  -8   2  -5   70.29    6.90
  -8   2  -5   81.59    8.80
   8   2   5   84.09    7.50
 -10  -2  -5  563.14   35.80
  10  -2   5  583.54   35.30
  10  -2   5  564.14   36.40
 -10  -2  -5  498.55   36.60
 -10  -2  -5  545.95   35.60
 -10  -2  -5  558.04   37.10
 -10  -2  -5  526.95   35.70
  10  -2   5  543.15   35.30
 -10  -2  -5  549.74   35.50
  10   2   5  560.14   36.00
  10   2   5  526.95   36.40
 -10   2  -5  587.74   35.60
  10   2   5  573.64   35.70
 -10   2  -5  640.94   35.80
 -10   2  -5  551.14   35.60
 -10   2  -5  489.65   35.50
 -10   2  -5  549.74   35.40
 -10   2  -5  528.15   37.00
  10   2   5  576.54   35.20
 -10   2  -5  620.14   36.10
  10   2   5  584.94   35.30
 -12  -2  -5    1.90    1.70
  12  -2   5    0.60    1.20
  12  -2   5   -1.10    1.10
 -12  -2  -5    1.10    1.30
 -12  -2  -5    1.40    1.50
 -12  -2  -5    0.90    2.50
  12   2   5    0.40    1.20
 -12   2  -5    0.20    2.50
 -12   2  -5    1.30    2.10
  12   2   5    1.50    1.30
 -12   2  -5    0.80    1.90
  12   2   5    1.70    1.30
 -12   2  -5    1.50    1.50
 -11  -3   5   33.80    5.10
  11  -3  -5   39.20    3.20
 -11  -3   5   31.90    4.30
  11  -3  -5   30.50    3.70
 -11  -3   5   33.60    4.30
  11  -3  -5   42.10    3.60
  11  -3  -5   35.50    4.70
 -11  -3   5   35.20    4.90
 -11  -3   5   34.50    4.10
 -11  -3   5   28.50    3.50
 -11  -3   5   27.70    4.10
 -11   3   5   30.00    4.30
  11   3  -5   31.90    3.30
 -11   3   5   34.70    3.80
 -11   3   5   23.60    5.40
 -11   3   5   29.00    4.80
 -11   3   5   36.10    4.20
  11   3  -5   40.90    3.70
 -11   3   5   26.00    3.90
  11   3  -5   34.20    4.40
  -9  -3   5  340.57   23.10
  -9  -3   5  336.07   23.60
  -9  -3   5  322.27   22.70
   9  -3  -5  327.27   21.80
   9  -3  -5  342.97   24.90
  -9  -3   5  341.27   22.30
  -9  -3   5  342.47   23.00
   9  -3  -5  364.36   23.40
  -9  -3   5  393.56   23.20
   9   3  -5  372.66   22.00
   9   3  -5  353.36   22.00
  -9   3   5  284.47   22.30
   9   3  -5  313.37   23.80
  -9   3   5  322.27   22.00
  -9   3   5  344.37   22.00
  -9   3   5  353.06   22.80
   9   3  -5  298.07   25.40
  -9   3   5  353.26   23.40
  -9   3   5  362.06   23.00
  -9   3   5  310.37   22.50
   9   3  -5  355.96   21.90
  -9   3   5  382.66   22.90
  -9   3   5  322.07   24.30
   9   3  -5  315.97   24.30
   7  -3  -5   48.70    5.50
  -7  -3   5   54.39    5.60
  -7  -3   5   53.69    6.30
  -7  -3   5   36.90    4.70
  -7  -3   5   55.09    5.40
   7  -3  -5   45.10    4.60
   7  -3  -5   44.20    6.60
  -7  -3   5   42.20    4.40
   7  -3  -5   41.00    3.80
  -7   3   5   52.29    5.90
   7   3  -5   51.89    4.10
  -7   3   5   42.20    4.10
  -7   3   5   42.00    4.70
   7   3  -5   42.70    4.90
   7   3  -5   50.69    4.10
  -7   3   5   42.60    6.00
  -7   3   5   52.59    5.10
   7   3  -5   41.90    4.10
  -7   3   5   38.90    5.00
  -7   3   5   38.50    4.40
  -7   3   5   51.49    5.00
  -7   3   5   43.80    6.70
   7   3  -5   48.40    6.00
  -5  -3   5  493.95   29.50
  -5  -3   5  406.56   30.50
   5  -3  -5  430.76   29.20
   5  -3  -5  467.25   29.80
  -5  -3   5  443.36   29.40
  -5  -3   5  439.46   29.60
  -5  -3   5  446.76   29.30
  -5  -3   5  456.15   29.80
  -5  -3   5  466.45   29.20
   5  -3  -5  445.06   28.70
   5   3  -5  435.26   28.60
   5   3  -5  434.66   29.10
   5   3  -5  481.65   29.90
  -5   3   5  478.25   29.60
  -5   3   5  488.35   29.30
  -5   3   5  454.05   30.70
   5   3  -5  467.95   30.90
  -5   3   5  462.05   29.30
  -3  -3   5  464.75   29.60
  -3  -3   5  459.15   29.40
  -3  -3   5  430.86   29.30
  -3  -3   5  442.56   29.80
  -3  -3   5  455.25   29.50
   3  -3  -5  468.25   29.30
   3  -3  -5  516.55   29.70
   3  -3  -5  430.16   29.10
  -3  -3   5  410.16   29.70
  -3  -3   5  441.86   30.50
  -3   3   5  470.05   29.70
  -3   3   5  484.25   29.50
   3   3  -5  466.55   29.90
   3   3  -5  494.45   29.40
  -3   3   5  490.65   30.50
   3   3  -5  485.25   30.70
  -3   3   5  480.05   29.40
  -1  -3   5  333.47   21.10
  -1  -3   5  330.77   20.40
  -1  -3   5  271.57   20.20
  -1  -3   5  326.27   20.60
  -1  -3   5  280.27   20.30
   1  -3  -5  326.17   20.30
   1  -3  -5  331.17   20.70
  -1   3   5  297.77   20.50
   1   3  -5  311.17   21.10
  -1   3   5  318.97   20.40
  -1   3   5  335.07   20.80
  -1   3   5  331.47   20.40
  -1   3   5  334.47   20.80
  -1   3   5  337.67   21.10
   1   3  -5  336.97   20.60
  -1  -3  -5  197.88   13.80
   1  -3   5  205.28   13.40
  -1  -3  -5  226.38   13.80
  -1  -3  -5  194.28   14.00
  -1  -3  -5  232.98   14.40
   1   3   5  234.28   14.00
   1   3   5  200.48   13.60
   1   3   5  199.88   14.20
   1   3   5  206.28   13.80
   3  -3   5  754.62   54.29
  -3  -3  -5  784.42   54.49
  -3  -3  -5  974.90   55.59
  -3  -3  -5  895.51   54.39
  -3  -3  -5  800.72   54.29
  -3  -3  -5  793.82   54.09
   3  -3   5  931.51   54.39
  -3  -3  -5  916.81   54.89
   3   3   5  858.01   54.19
   3   3   5  903.81   55.09
   3   3   5  925.71   54.49
  -5  -3  -5  136.59   11.00
   5  -3   5  162.88   10.80
  -5  -3  -5  155.18   11.40
  -5  -3  -5  145.59   10.50
   5  -3   5  133.09    9.70
   5   3   5  148.99   10.60
  -5   3  -5  138.79   10.20
   5   3   5  154.98    9.90
   5   3   5  161.88   11.90
   7  -3   5  176.48   12.50
   7  -3   5  175.98   12.90
   7  -3   5  165.58   11.40
  -7  -3  -5  174.88   11.70
  -7  -3  -5  156.18   11.60
  -7  -3  -5  162.08   13.10
  -7  -3  -5  160.48   12.80
  -7  -3  -5  158.18   11.80
  -7  -3  -5  161.88   12.70
  -7  -3  -5  187.28   11.80
  -7  -3  -5  170.88   12.00
   7   3   5  167.88   11.20
  -7   3  -5  151.78   11.80
  -7   3  -5  170.88   11.60
  -7   3  -5  179.78   11.80
  -7   3  -5  168.58   12.90
  -7   3  -5  177.68   12.10
  -7   3  -5  152.18   11.70
   7   3   5  171.98   14.10
   7   3   5  177.08   11.30
  -7   3  -5  173.88   12.10
  -7   3  -5  193.88   13.60
   7   3   5  158.78   12.20
   7   3   5  161.98   11.30
  -7   3  -5  159.58   11.90
  -7   3  -5  173.08   11.50
   9  -3   5   34.70    5.30
  -9  -3  -5   30.70    5.30
  -9  -3  -5   28.80    6.00
  -9  -3  -5   26.10    3.80
   9  -3   5   31.30    3.40
   9  -3   5   33.90    4.30
  -9  -3  -5   27.20    3.70
  -9  -3  -5   18.90    5.20
  -9  -3  -5   30.30    4.10
  -9   3  -5   24.50    3.80
   9   3   5   34.40    4.90
  -9   3  -5   28.00    4.10
   9   3   5   31.10    4.80
  -9   3  -5   24.20    3.90
  -9   3  -5   28.60    4.00
  -9   3  -5   33.70    4.20
  -9   3  -5   31.00    4.60
   9   3   5   17.80    6.20
   9   3   5   31.40    3.80
   9   3   5   24.10    3.60
 -11  -3  -5  131.19   10.10
  11  -3   5  148.69   10.00
 -11  -3  -5  156.58   10.90
 -11  -3  -5  134.29   11.10
 -11  -3  -5  141.39   10.00
 -11  -3  -5  154.28   10.30
  11  -3   5  148.59   10.40
  11  -3   5  141.09    9.80
 -11   3  -5  158.98   10.30
  11   3   5  149.69   10.90
  11   3   5  163.58    9.90
  11   3   5  153.08   10.10
 -11   3  -5  164.58   10.50
 -11   3  -5  144.59   11.30
 -12  -4   5   62.69    5.30
  12  -4  -5   61.09    4.50
  12  -4  -5   64.89    4.60
 -12  -4   5   61.69    4.70
 -12  -4   5   59.99    4.90
  12   4  -5   51.49    4.60
  12   4  -5   62.19    4.30
 -12   4   5   58.69    5.10
 -12   4   5   72.29    5.00
  12   4  -5   57.19    4.40
 -12   4   5   55.59    4.50
 -10  -4   5   41.30    5.10
 -10  -4   5   42.90    4.70
  10  -4  -5   43.40    5.30
 -10  -4   5   37.60    6.10
 -10  -4   5   44.40    5.30
 -10  -4   5   46.50    5.40
  10  -4  -5   46.00    4.10
 -10   4   5   42.70    7.60
 -10   4   5   43.20    4.80
  10   4  -5   42.50    4.00
 -10   4   5   48.40    5.10
 -10   4   5   47.80    6.10
 -10   4   5   54.59    5.30
 -10   4   5   49.80    4.20
  10   4  -5   43.20    4.10
  10   4  -5   36.50    5.60
 -10   4   5   38.70    4.50
  10   4  -5   43.00    5.40
 -10   4   5   43.60    6.80
  -8  -4   5  113.19    8.60
   8  -4  -5   83.19    7.00
   8  -4  -5  101.29    7.90
  -8  -4   5  103.49    9.80
   8  -4  -5  110.99   10.90
  -8  -4   5   99.89    8.70
  -8   4   5   99.49    7.50
   8   4  -5   97.49    7.40
   8   4  -5   76.79   12.70
  -8   4   5  101.79    8.50
  -8   4   5  106.89    8.50
   8   4  -5  104.29    7.30
  -8   4   5   97.29    8.10
  -8   4   5   94.59    9.80
   8   4  -5  102.09    7.30
  -8   4   5   88.39    7.90
  -8   4   5  107.19    7.80
   8   4  -5   98.99    8.50
  -8   4   5  109.99    8.30
  -8   4   5   96.19    9.00
  -6  -4   5  114.09    9.50
   6  -4  -5  113.09    7.80
   6  -4  -5  115.09    9.00
   6  -4  -5  109.89    8.00
  -6  -4   5  106.69   10.10
  -6  -4   5  121.19    8.90
  -6  -4   5  116.59    9.30
  -6  -4   5  132.99   10.00
   6  -4  -5  115.99    9.80
  -6  -4   5  112.09    9.00
  -6  -4   5  108.29    8.20
  -6   4   5   98.79    8.60
  -6   4   5  110.19    8.40
   6   4  -5  119.29    7.90
  -6   4   5  122.29    8.80
   6   4  -5  125.29    8.00
  -6   4   5  120.49    9.10
  -6   4   5  131.39   10.80
  -6   4   5  103.69   10.50
   6   4  -5  113.29    9.60
   6   4  -5  105.69    7.90
  -6   4   5  129.89    9.20
   6   4  -5  110.49    8.80
  -6   4   5  113.69    8.20
  -6   4   5  127.39    8.50
  -6   4   5  118.99   10.20
  -4  -4   5  691.33   43.60
  -4  -4   5  611.94   43.60
  -4  -4   5  675.13   43.70
  -4  -4   5  720.43   43.90
  -4  -4   5  660.83   44.20
   4  -4  -5  663.93   43.20
  -4  -4   5  668.13   44.10
  -4  -4   5  642.04   45.00
   4  -4  -5  722.93   43.50
   4  -4  -5  751.02   43.90
   4   4  -5  633.34   43.20
  -4   4   5  742.93   45.20
   4   4  -5  689.43   44.20
  -4   4   5  708.83   43.60
   4   4  -5  717.23   45.20
  -4   4   5  729.43   43.80
  -4   4   5  725.93   44.00
  -2  -4   5    8.90    1.70
  -2  -4   5    7.20    2.50
  -2   4   5    8.60    2.70
  -2   4   5   16.20    3.10
   0  -4  -5  288.57   19.40
   0  -4  -5  275.27   18.90
   0  -4   5  324.47   19.50
   0  -4   5  269.17   18.60
   0  -4  -5  289.67   18.80
   0   4   5  317.87   19.40
   0   4   5  328.87   19.90
   0   4   5  302.97   19.20
   0   4   5  270.17   18.80
   0   4   5  274.47   19.00
  -2  -4  -5 1084.09   71.69
  -2  -4  -5 1110.79   72.19
   2  -4   5 1041.70   71.59
   2  -4   5 1202.98   71.89
  -2  -4  -5 1201.08   71.99
  -2  -4  -5 1206.08   72.59
   2   4   5 1101.39   71.69
   2   4   5 1156.68   72.49
   2   4   5 1249.18   72.09
  -4  -4  -5 5289.97  317.57
  -4  -4  -5 4873.01  317.27
  -4  -4  -5 4860.21  317.97
  -4  -4  -5 5198.68  318.07
  -4  -4  -5 4809.12  317.57
  -4  -4  -5 5091.49  317.97
   4   4   5 5090.09  317.27
   4   4   5 5482.85  317.57
   4   4   5 5321.47  318.47
   4   4   5 5174.28  316.97
   6  -4   5  109.49    8.40
  -6  -4  -5   95.29    7.90
   6  -4   5   97.09    7.10
  -6  -4  -5   94.49    7.40
  -6  -4  -5  107.29    7.50
  -6  -4  -5   92.49    8.20
  -6  -4  -5  107.79    9.20
  -6  -4  -5  100.59    9.10
  -6   4  -5  102.49    7.90
  -6   4  -5   98.69    7.60
  -6   4  -5  106.99    8.00
  -6   4  -5  117.79    7.70
  -6   4  -5  119.99    9.30
  -6   4  -5   99.39    7.40
  -6   4  -5   95.09    7.60
   6   4   5  102.89    7.20
  -6   4  -5   89.19    7.40
  -6   4  -5   96.09    7.30
   6   4   5  104.69    7.10
   6   4   5  103.79    8.20
   6   4   5  109.99    7.20
  -6   4  -5   83.29    7.50
   6   4   5   99.89    7.70
  -6   4  -5   99.39    7.40
   6   4   5   95.29   10.00
  -6   4  -5   97.89   10.10
  -8  -4  -5  149.39   11.20
  -8  -4  -5  164.78   11.50
  -8  -4  -5  153.98   12.80
  -8  -4  -5  138.69   12.90
   8  -4   5  161.98   11.20
   8  -4   5  154.48   12.60
  -8  -4  -5  147.29   11.30
   8  -4   5  171.48   12.10
  -8   4  -5  141.19   11.50
  -8   4  -5  158.48   11.60
  -8   4  -5  168.08   11.50
  -8   4  -5  163.68   13.20
   8   4   5  172.08   12.30
  -8   4  -5  182.18   11.60
   8   4   5  167.78   10.80
   8   4   5  155.98   10.90
  -8   4  -5  163.18   12.60
   8   4   5  167.98   11.80
   8   4   5  148.79   14.50
   8   4   5  168.38   11.10
  -8   4  -5  176.28   11.70
  -8   4  -5  170.18   12.00
  -8   4  -5  163.98   11.30
 -10  -4  -5    3.30    1.90
 -10  -4  -5    1.00    2.10
 -10  -4  -5    1.30    2.20
 -10  -4  -5    7.40    4.50
  10  -4   5    1.70    2.40
  10  -4   5    4.50    1.90
  10  -4   5   -2.60    4.10
 -10  -4  -5    2.80    3.60
 -10  -4  -5   -0.90    3.20
 -10   4  -5    1.10    2.20
  10   4   5   -0.10    1.80
 -10   4  -5    3.20    2.90
  10   4   5    0.60    1.50
 -10   4  -5   -0.70    3.00
  10   4   5    1.70    2.00
  10   4   5    0.50    2.80
 -10   4  -5    3.30    2.40
  10   4   5    2.70    2.70
 -10   4  -5    0.60    2.20
 -10   4  -5    3.20    2.20
 -10   4  -5    0.20    1.90
 -11  -5   5  105.69    8.40
  11  -5  -5  119.89    7.80
 -11  -5   5  115.49    8.40
 -11  -5   5  100.29    7.90
 -11  -5   5  105.39    8.90
  11  -5  -5  112.79    7.60
  11   5  -5  116.09    7.70
  11   5  -5  101.29    7.70
 -11   5   5  121.59    8.20
 -11   5   5  107.99    9.20
  11   5  -5  117.79    7.70
 -11   5   5  121.69    8.50
 -11   5   5  110.29    7.70
 -11   5   5  108.79    7.90
  -9  -5   5   48.10    5.70
  -9  -5   5   50.19    5.20
  -9  -5   5   45.40    5.20
  -9  -5   5   45.60    6.30
   9  -5  -5   41.90    5.10
   9  -5  -5   47.10    4.20
  -9   5   5   38.50    6.20
   9   5  -5   49.30    4.20
  -9   5   5   38.60    4.60
  -9   5   5   52.39    5.20
   9   5  -5   44.60    5.50
   9   5  -5   51.59   11.00
  -9   5   5   46.40    4.40
  -9   5   5   47.80    5.90
  -9   5   5   45.80    5.60
  -9   5   5   44.00    5.00
   9   5  -5   28.90    9.80
   9   5  -5   49.30    4.30
   9   5  -5   37.50    6.40
   9   5  -5   47.90    4.40
  -9   5   5   56.59    5.40
  -9   5   5   49.20    4.60
  -7  -5   5  152.78   12.00
  -7  -5   5  147.89   11.50
   7  -5  -5  161.58   11.70
   7  -5  -5  154.58   10.70
  -7  -5   5  163.58   11.90
   7  -5  -5  153.98   12.70
  -7  -5   5  161.48   11.60
   7  -5  -5  135.19   10.30
   7   5  -5  144.59   12.40
  -7   5   5  149.79   11.00
   7   5  -5  130.19   14.20
  -7   5   5  171.48   11.70
   7   5  -5  160.18   11.50
  -7   5   5  141.39   13.70
  -7   5   5  157.28   13.80
  -7   5   5  163.48   13.40
  -7   5   5  161.28   11.40
   7   5  -5  162.98   10.70
   7   5  -5  181.28   10.80
  -7   5   5  130.89   12.20
   7   5  -5  153.38   10.60
  -7   5   5  171.68   12.20
  -7   5   5  152.78   12.00
  -7   5   5  178.18   11.40
  -7   5   5  157.68   11.50
  -5  -5   5    9.60    2.50
  -5  -5   5   11.60    1.90
  -5  -5   5    8.50    3.20
  -5  -5   5    9.40    3.50
   5  -5  -5    8.70    1.90
  -5  -5   5    9.60    4.70
  -5  -5   5    8.40    2.80
   5  -5  -5    9.30    2.30
  -5  -5   5   12.80    2.00
  -5  -5   5    8.40    2.40
   5  -5  -5   13.20    3.20
  -5   5   5    8.40    3.50
   5   5  -5   12.60    2.10
   5   5  -5   11.70    2.90
  -5   5   5    9.00    2.30
  -5   5   5   10.20    5.60
  -5   5   5    9.10    2.90
  -5   5   5    8.90    2.90
   5   5  -5   12.90    2.30
   5   5  -5    4.50    2.60
  -5   5   5    7.30    2.90
  -5   5   5    7.50    2.50
  -5   5   5   14.30    2.80
   5   5  -5    8.30    1.90
  -3  -5   5  303.67   21.80
  -3  -5   5  312.37   19.90
  -3  -5   5  312.37   20.90
  -3  -5   5  341.57   20.30
  -3  -5   5  316.37   20.50
   3  -5  -5  353.16   20.60
  -3  -5   5  305.97   20.40
   3  -5  -5  279.97   19.90
  -3  -5   5  308.67   20.80
   3  -5  -5  325.77   20.10
  -3   5   5  305.57   21.50
  -3   5   5  288.37   20.60
   3   5  -5  342.57   20.40
   3   5  -5  305.07   20.70
  -3   5   5  313.47   20.30
  -3   5   5  302.57   20.30
  -1  -5   5   12.30    2.50
  -1  -5   5   10.60    2.00
  -1  -5   5    9.70    1.80
  -1  -5   5    7.00    2.80
   1  -5  -5    7.70    2.80
  -1  -5   5    8.70    2.00
   1  -5  -5    8.80    2.10
   1  -5  -5    8.80    2.00
  -1   5   5    7.10    2.50
   1   5  -5   11.30    2.10
  -1   5   5   14.10    3.00
  -1   5   5   10.60    2.90
   1  -5   5   42.40    4.10
  -1  -5  -5   30.10    3.80
  -1  -5  -5   36.40    3.90
  -1  -5  -5   32.30    5.00
   1  -5   5   33.00    3.00
  -1  -5  -5   35.50    4.60
   1  -5   5   33.40    3.00
   1   5   5   37.20    5.20
   1   5   5   36.30    4.50
   1   5   5   47.30    5.60
   1   5   5   35.90    5.20
  -3  -5  -5  108.29    8.30
   3  -5   5   93.89    7.50
  -3  -5  -5  112.79    8.10
  -3  -5  -5  116.09    8.80
  -3  -5  -5  120.29    8.90
  -3  -5  -5  119.99    8.60
  -3  -5  -5  111.89    7.50
  -3  -5  -5  130.59    9.60
   3   5   5  121.99    8.40
   3   5   5  100.69    7.90
   3   5   5  106.69    9.30
  -5  -5  -5  920.21   63.69
  -5  -5  -5  929.61   63.29
  -5  -5  -5  963.10   63.59
  -5  -5  -5  943.11   64.19
   5  -5   5  975.40   63.29
  -5   5  -5 1017.80   63.89
   5   5   5 1022.00   64.89
   5   5   5  970.20   62.79
  -5   5  -5 1163.58   63.59
  -5   5  -5 1089.59   64.39
  -5   5  -5 1067.89   63.59
  -5   5  -5  976.20   63.49
  -5   5  -5 1109.29   64.49
   5   5   5  955.40   63.19
   5   5   5 1013.10   63.59
  -5   5  -5  970.60   63.09
   5   5   5 1054.19   62.99
  -5   5  -5  995.30   63.19
  -7  -5  -5   76.69    8.10
  -7  -5  -5   78.99    6.60
  -7  -5  -5   75.79    7.30
   7  -5   5   81.79    7.30
   7  -5   5   78.49    6.40
  -7  -5  -5   80.49    8.90
  -7  -5  -5   79.19    8.30
  -7  -5  -5   72.99    7.30
   7   5   5   89.49    7.80
  -7   5  -5   78.89    6.40
  -7   5  -5   85.79    7.30
  -7   5  -5   86.79    6.80
   7   5   5   82.29    6.20
   7   5   5   73.39   11.00
  -7   5  -5   81.59    9.90
  -7   5  -5   94.69    6.60
  -7   5  -5   93.79    7.10
  -7   5  -5   88.39    8.80
  -7   5  -5   84.89    7.30
  -7   5  -5   74.69    6.80
   7   5   5   83.59    6.50
   7   5   5   79.89    7.40
  -7   5  -5   87.19    7.30
   7   5   5   73.49    6.60
  -7   5  -5   83.79    7.40
  -9  -5  -5  148.49   12.30
  -9  -5  -5  152.18   10.20
   9  -5   5  127.99   11.00
  -9  -5  -5  119.19   11.20
  -9  -5  -5  132.29   11.70
  -9  -5  -5  128.39   10.10
  -9  -5  -5  143.99   10.10
   9   5   5  146.79   11.30
   9   5   5  146.99    9.70
  -9   5  -5  138.99   10.20
   9   5   5  146.39   10.80
  -9   5  -5  155.88   10.50
   9   5   5  155.38   10.00
   9   5   5  151.28   10.00
  -9   5  -5  145.79   10.40
  -9   5  -5  124.89   10.40
  -9   5  -5  152.18   10.20
  -9   5  -5  161.58   10.90
  -9   5  -5  134.39   11.70
 -11   5  -5    5.00    2.10
  11   5   5    5.40    1.60
  11   5   5    5.40    1.60
 -11   5  -5    4.50    2.60
 -11   5  -5    8.90    2.50
  10  -6  -5   23.90    3.20
 -10  -6   5   28.20    4.10
 -10  -6   5   31.50    4.40
 -10  -6   5   15.40    4.20
  10  -6  -5   23.80    4.40
 -10  -6   5   24.10    4.50
 -10   6   5   23.30    4.40
 -10   6   5   13.90    6.80
  10   6  -5   27.70    3.00
 -10   6   5   33.00    3.30
  10   6  -5   24.60    3.00
 -10   6   5   27.90    4.20
  -8  -6   5   17.00    4.00
   8  -6  -5   23.10    2.90
   8  -6  -5   26.40    4.20
   8  -6  -5   21.20    4.40
   8  -6  -5   23.50    5.60
  -8  -6   5   24.30    3.90
  -8  -6   5   25.60    4.20
  -8  -6   5   26.50    4.00
  -8  -6   5   31.80    5.90
  -8   6   5   24.00    3.60
  -8   6   5   28.80    4.00
  -8   6   5   19.10    5.00
   8   6  -5   19.20    4.00
   8   6  -5   21.80    3.10
  -8   6   5   22.30    4.70
   8   6  -5   30.60    6.40
  -8   6   5   23.10    4.10
   8   6  -5   11.70    9.50
  -8   6   5   29.90    4.20
  -8   6   5   28.30    3.40
   8   6  -5   20.40    3.10
   8   6  -5   25.30    4.90
  -8   6   5   22.30    4.00
   8   6  -5   25.60    3.20
  -8   6   5   23.20    3.30
  -6  -6   5   66.69    6.00
   6  -6  -5   58.89    5.90
   6  -6  -5   64.89    6.70
  -6  -6   5   62.79    4.70
   6  -6  -5   66.39    5.10
  -6  -6   5   60.59    5.70
  -6  -6   5   55.79    8.10
  -6  -6   5   64.09    6.40
  -6  -6   5   74.79    7.10
  -6   6   5   53.59    6.00
   6   6  -5   58.69    6.70
  -6   6   5   58.09    7.20
  -6   6   5   63.89    6.60
   6   6  -5   59.39    4.90
   6   6  -5   47.30    5.80
  -6   6   5   52.59    5.00
  -6   6   5   63.59    5.50
  -6   6   5   68.39    5.90
   6   6  -5   62.89    5.00
   6   6  -5   57.69    5.60
   6   6  -5   63.09    4.90
  -6   6   5   73.39    5.80
  -6   6   5   60.29    5.30
  -6   6   5   64.19    8.40
  -6   6   5   56.59    5.70
  -6   6   5   65.49    5.90
  -4  -6   5  820.92   51.49
   4  -6  -5  746.63   50.79
  -4  -6   5  889.51   51.69
  -4  -6   5  749.62   51.79
   4  -6  -5  830.02   51.09
  -4  -6   5  733.13   50.79
  -4  -6   5  821.92   52.19
  -4  -6   5  810.02   50.89
  -4  -6   5  765.62   53.19
  -4  -6   5  863.61   51.29
  -4  -6   5  768.02   51.19
   4  -6  -5  915.01   51.49
   4   6  -5  827.52   51.29
  -4   6   5  877.41   51.29
  -4   6   5  833.82   51.39
  -4   6   5  844.62   51.19
   4   6  -5  788.12   50.79
  -4   6   5  815.12   51.19
  -4   6   5  832.02   53.19
   4   6  -5  790.62   51.89
  -4   6   5  810.02   51.39
   4   6  -5  777.32   50.69
   4   6  -5  705.93   52.59
  -4   6   5  834.32   51.79
  -4   6   5  874.21   53.09
  -2  -6   5    5.30    2.40
  -2  -6   5    4.60    1.80
  -2  -6   5    7.90    2.20
  -2  -6   5    7.90    2.90
  -2  -6   5    5.20    1.40
  -2  -6   5    5.70    2.20
   2  -6  -5    4.50    2.50
   2  -6  -5    4.80    1.60
  -2  -6   5    7.40    1.80
  -2  -6   5    5.70    2.00
   2  -6  -5    4.60    3.00
  -2   6   5    3.60    2.70
  -2   6   5    3.70    2.10
   2   6  -5    2.60    2.20
   2   6  -5    5.60    3.20
  -2   6   5    5.60    2.10
   2   6  -5    1.90    5.90
   0  -6  -5    8.40    2.20
   0  -6   5   10.80    2.30
   0  -6   5    9.20    2.00
   0  -6   5   11.90    2.10
   0  -6  -5    9.10    1.70
   0  -6   5    8.70    1.80
   0  -6  -5    9.80    2.40
   0  -6   5    9.40    2.80
   0  -6  -5    8.70    3.40
   0   6   5    9.40    2.90
   0   6   5    7.70    2.40
   0   6   5    7.40    2.50
   0   6   5    7.60    3.30
  -2  -6  -5    1.50    2.40
   2  -6   5    3.90    1.80
   2  -6   5    2.90    1.20
  -2  -6  -5    2.90    1.90
  -2  -6  -5    1.10    2.00
  -2  -6  -5    6.80    3.40
   2  -6   5    0.00    1.10
  -2  -6  -5    2.20    1.50
   2   6   5   -0.20    2.80
   2   6   5    0.60    3.50
   2   6   5   -1.90    3.00
   2   6   5    4.80    2.30
  -4  -6  -5  393.86   26.20
  -4  -6  -5  414.36   25.60
  -4  -6  -5  406.66   25.20
  -4  -6  -5  405.26   26.80
  -4  -6  -5  413.96   26.80
  -4  -6  -5  440.36   26.40
  -4  -6  -5  398.56   25.80
  -4   6  -5  361.86   25.30
  -4   6  -5  427.06   26.00
  -4   6  -5  378.56   25.90
  -4   6  -5  424.26   26.60
  -4   6  -5  383.46   25.60
   4   6   5  408.76   27.30
   4   6   5  386.86   25.60
  -4   6  -5  403.86   25.60
   4   6   5  419.66   26.20
  -4   6  -5  373.16   25.70
   4   6   5  370.16   25.10
   4   6   5  389.16   25.20
  -6  -6  -5   48.80    6.40
  -6  -6  -5   54.59    5.50
  -6  -6  -5   44.60    5.60
  -6  -6  -5   44.70    4.90
   6  -6   5   39.30    5.00
  -6  -6  -5   47.80    6.80
   6   6   5   51.99    4.40
  -6   6  -5   58.09    6.40
   6   6   5   50.89    5.60
  -6   6  -5   37.80    4.30
   6   6   5   47.40    4.00
  -6   6  -5   50.19    5.10
  -6   6  -5   51.49    4.60
  -6   6  -5   39.80    5.30
  -6   6  -5   48.10    4.40
  -6   6  -5   43.50    4.30
   6   6   5   46.20    5.30
  -6   6  -5   54.89    5.20
  -6   6  -5   49.30    4.70
  -6   6  -5   48.00    4.90
   6   6   5   47.40    8.90
  -6   6  -5   49.00    4.90
   8  -6   5   31.60    6.10
  -8  -6  -5   35.50    4.10
  -8  -6  -5   29.10    5.90
  -8  -6  -5   26.70    5.50
  -8  -6  -5   27.00    4.90
  -8  -6  -5   30.20    5.50
  -8  -6  -5   33.80    3.70
   8   6   5   34.30    9.30
  -8   6  -5   36.60    4.80
   8   6   5   29.10    5.20
   8   6   5   32.60    3.90
  -8   6  -5   35.60    4.20
  -8   6  -5   37.10    4.10
   8   6   5   29.70    5.00
   8   6   5   30.70    3.40
  -8   6  -5   36.40    4.00
  -8   6  -5   28.80    4.50
  -8   6  -5   34.50    4.00
  -8   6  -5   30.80    6.10
  -8   6  -5   36.90    4.50
  -8   6  -5   35.00    4.20
 -10  -6  -5    2.00    3.30
 -10  -6  -5   15.10    4.50
  10  -6   5   -0.90    3.70
 -10   6  -5    7.20    2.00
  10   6   5    9.40    3.50
 -10   6  -5    5.20    3.30
 -11  -7   5   48.70    4.20
 -11   7   5   49.90    4.00
 -11   7   5   36.50    3.80
 -11   7   5   48.40    3.60
  11   7  -5   42.70    3.30
 -11   7   5   35.10    3.40
 -11   7   5   45.40    4.70
  -9  -7   5   45.90    5.50
   9  -7  -5   51.79    5.30
  -9  -7   5   42.70    4.40
   9  -7  -5   37.10    4.00
  -9  -7   5   38.90    5.90
  -9  -7   5   45.30    6.30
   9   7  -5   38.50    4.10
  -9   7   5   39.70    6.40
   9   7  -5   53.69    4.00
  -9   7   5   48.80    4.60
  -9   7   5   38.50    6.00
  -9   7   5   45.80    5.00
  -9   7   5   44.50    4.20
  -9   7   5   50.89    4.90
   7  -7  -5  101.79    8.70
  -7  -7   5  111.29    9.20
  -7  -7   5  111.49    8.50
  -7  -7   5  101.69    8.40
   7  -7  -5  105.69    7.70
  -7  -7   5  102.49    8.80
  -7  -7   5  111.29    9.50
   7  -7  -5   89.49    8.00
   7  -7  -5  100.39    9.90
   7   7  -5   99.69    7.40
  -7   7   5   98.59    7.70
  -7   7   5  117.89   10.50
  -7   7   5  101.19   11.20
  -7   7   5  112.39    8.40
  -7   7   5  105.69    9.20
   7   7  -5  107.19    7.40
  -7   7   5  113.29    8.10
   7   7  -5   88.49    8.40
   7   7  -5   99.69    7.40
  -7   7   5   96.89    8.20
  -7   7   5  108.99    8.50
   7   7  -5  106.49    8.10
  -7   7   5  120.99    8.50
  -7   7   5  102.39    7.90
  -7   7   5   98.69    8.70
  -5  -7   5   37.90    3.50
  -5  -7   5   36.00    4.60
  -5  -7   5   44.50    8.70
  -5  -7   5   46.40    4.70
  -5  -7   5   33.90    6.00
   5  -7  -5   38.90    3.80
  -5  -7   5   49.40    5.30
  -5  -7   5   39.00    5.60
  -5  -7   5   28.80    4.00
   5  -7  -5   38.10    4.40
  -5  -7   5   32.50    3.60
  -5   7   5   37.50    6.80
  -5   7   5   41.80    4.80
  -5   7   5   41.70    4.10
  -5   7   5   42.10    4.40
   5   7  -5   43.70    4.30
   5   7  -5   25.80    5.40
  -5   7   5   37.90    4.60
   5   7  -5   33.80    3.30
  -5   7   5   31.40    5.40
  -5   7   5   32.00    4.40
   5   7  -5   43.70    3.50
  -5   7   5   40.10    4.40
  -5   7   5   37.50    5.40
  -5   7   5   34.30    4.40
  -3  -7   5 2318.67  154.18
  -3  -7   5 2483.75  154.98
  -3  -7   5 2507.75  154.08
  -3  -7   5 2636.14  154.68
  -3  -7   5 2335.87  154.38
  -3  -7   5 2398.26  156.38
   3  -7  -5 2619.44  154.78
  -3  -7   5 2552.64  154.28
   3  -7  -5 2422.16  154.08
  -3  -7   5 2524.65  154.78
  -3  -7   5 2478.45  154.68
  -3  -7   5 2589.44  155.38
   3  -7  -5 2435.86  154.18
   3  -7  -5 2309.27  153.88
  -3   7   5 2471.55  154.88
   3   7  -5 2496.45  154.78
  -3   7   5 2487.05  154.38
  -3   7   5 2462.05  154.38
  -3   7   5 2492.25  154.38
   3   7  -5 2505.75  154.58
  -3   7   5 2378.26  154.48
  -3   7   5 2515.35  154.18
  -3   7   5 2648.54  156.28
   1  -7  -5  203.68   13.40
  -1  -7   5  201.08   14.80
   1  -7  -5  212.48   13.30
  -1  -7   5  175.68   13.50
  -1  -7   5  187.48   13.00
  -1  -7   5  186.88   13.30
   1  -7  -5  215.68   14.40
  -1   7   5  210.38   13.80
  -1   7   5  188.68   13.30
  -1   7   5  188.88   13.70
  -1  -7  -5 1296.07   78.79
   1  -7   5 1179.68   78.79
  -1  -7  -5 1287.67   79.49
  -1  -7  -5 1314.67   79.29
  -1  -7  -5 1320.17   80.39
   1  -7   5 1074.89   78.99
   1  -7   5 1133.89   78.89
   1  -7   5 1344.27   80.09
  -1  -7  -5 1260.47   79.69
   1  -7   5 1246.58   79.49
   1   7   5 1396.36   81.09
   1   7   5 1346.47   79.69
  -3  -7  -5  147.09   10.20
  -3  -7  -5  149.19   10.60
  -3  -7  -5  149.88    9.00
  -3   7  -5  117.49    9.20
  -3   7  -5  124.39    9.70
  -3   7  -5  125.69    9.30
  -3   7  -5  134.29    9.40
   3   7   5  123.99    8.80
   3   7   5  161.58   10.30
   3   7   5  127.49   11.60
  -3   7  -5  145.09   10.30
  -3   7  -5  120.89    9.70
  -3   7  -5  130.79    9.50
   3   7   5  109.59   11.20
  -5  -7  -5  929.11   53.49
  -5  -7  -5  732.53   51.29
  -5  -7  -5  815.92   53.09
  -5  -7  -5  830.62   52.69
  -5  -7  -5  829.12   52.09
  -5  -7  -5  847.02   53.29
  -5   7  -5  870.61   52.09
  -5   7  -5  817.42   52.19
   5   7   5  827.12   51.79
   5   7   5  800.32   52.39
   5   7   5  812.92   51.19
   5   7   5  826.62   51.29
  -5   7  -5  849.22   52.29
  -5   7  -5  830.82   51.49
  -5   7  -5  866.61   51.79
  -5   7  -5  703.73   51.49
  -5   7  -5  795.32   51.49
   5   7   5  784.22   51.29
  -5   7  -5  792.32   51.79
   5   7   5  785.52   53.79
  -5   7  -5  911.01   52.99
  -5   7  -5  866.51   51.79
   5   7   5  743.83   51.79
  -5   7  -5  846.92   51.89
  -7  -7  -5   50.59    5.70
  -7  -7  -5   44.70    5.20
  -7  -7  -5   50.19    7.90
  -7  -7  -5   54.69    7.30
  -7  -7  -5   55.09    6.50
  -7  -7  -5   50.79    6.50
   7   7   5   52.29    4.40
  -7   7  -5   64.19    5.00
   7   7   5   53.09    4.70
  -7   7  -5   57.09    5.40
  -7   7  -5   56.79    4.90
   7   7   5   58.59    4.80
  -7   7  -5   59.89    5.60
  -7   7  -5   55.89    7.10
  -7   7  -5   49.40    4.70
  -7   7  -5   59.89    5.50
   7   7   5   49.70    5.90
  -7   7  -5   54.09    5.60
  -7   7  -5   50.29    5.80
   7   7   5   52.59    6.30
  -7   7  -5   52.59    4.80
   7   7   5   81.59   13.20
  -7   7  -5   57.89    5.30
  -9  -7  -5  442.86   29.90
  -9  -7  -5  446.86   28.20
  -9   7  -5  410.66   28.20
  -9   7  -5  407.16   29.40
  -9   7  -5  467.65   28.50
   9   7   5  454.25   27.90
  -9   7  -5  494.85   28.10
  -9   7  -5  487.35   28.30
   9   7   5  388.56   29.10
  -9   7  -5  469.95   28.50
  -9   7  -5  415.26   28.60
   9   7   5  394.66   27.90
   9   7   5  437.56   27.90
  -9   7  -5  450.05   28.70
 -11  -7  -5   54.39    4.10
 -11   7  -5   65.49    4.80
 -11   7  -5   48.90    4.40
 -11   7  -5   47.50    4.30
  11   7   5   60.49    4.00
 -11   7  -5   43.80    5.20
 -10  -8   5   36.90    4.30
 -10  -8   5   29.20    5.00
 -10  -8   5   28.90    4.00
 -10   8   5   32.20    4.70
 -10   8   5   36.20    3.60
  10   8  -5   29.30    2.80
 -10   8   5   37.90    3.40
  -8  -8   5  216.88   16.80
  -8  -8   5  210.78   16.20
  -8  -8   5  210.08   16.60
  -8  -8   5  256.37   16.40
   8  -8  -5  241.18   15.80
  -8   8   5  242.98   16.10
  -8   8   5  245.78   15.80
   8   8  -5  236.38   15.10
  -8   8   5  232.58   15.90
  -8   8   5  207.88   19.10
  -8   8   5  229.18   16.20
  -8   8   5  241.28   18.10
  -8   8   5  238.18   15.60
  -8   8   5  244.98   16.20
   8   8  -5  255.97   16.00
  -8   8   5  250.17   15.80
   8   8  -5  235.18   15.20
  -8   8   5  228.48   16.90
  -6  -8   5  216.88   15.00
  -6  -8   5  208.38   14.30
  -6  -8   5  194.08   13.30
   6  -8  -5  174.98   14.20
  -6  -8   5  203.78   15.50
   6  -8  -5  214.18   13.70
  -6  -8   5  194.08   14.30
  -6  -8   5  221.78   16.80
  -6   8   5  209.88   14.30
  -6   8   5  197.48   13.70
   6   8  -5  191.78   13.30
  -6   8   5  195.48   19.60
  -6   8   5  242.38   16.70
   6   8  -5  195.38   14.10
  -6   8   5  184.78   14.10
  -6   8   5  219.08   14.30
  -6   8   5  224.48   15.30
  -6   8   5  216.58   14.50
  -6   8   5  199.58   13.90
  -6   8   5  205.88   14.00
  -6   8   5  201.28   14.50
   6   8  -5  197.28   13.20
   4  -8  -5 1351.96   83.89
  -4  -8   5 1304.67   83.59
   4  -8  -5 1290.97   83.19
  -4  -8   5 1335.87   83.59
  -4  -8   5 1375.76   84.59
   4  -8  -5 1155.88   82.89
   4  -8  -5 1386.96   83.39
  -4  -8   5 1401.96   85.09
  -4  -8   5 1326.57   83.99
  -4  -8   5 1383.56   83.19
  -4  -8   5 1371.76   84.09
  -4  -8   5 1263.57   86.19
  -4  -8   5 1354.56   83.29
  -4   8   5 1535.65   85.89
  -4   8   5 1340.77   83.69
   4   8  -5 1317.07   83.89
  -4   8   5 1354.36   83.49
  -4   8   5 1313.77   83.69
  -4   8   5 1382.36   84.39
  -4   8   5 1162.58   83.59
  -4   8   5 1299.97   83.69
   4   8  -5 1253.47   83.39
  -4   8   5 1290.57   83.49
  -4   8   5 1479.65   86.29
   4   8  -5 1331.67   82.89
  -2  -8   5  193.08   17.00
  -2  -8   5  168.68   12.90
  -2  -8   5  180.58   12.70
   2  -8  -5  176.68   11.80
  -2  -8   5  195.28   12.90
   2  -8  -5  156.98   13.80
  -2  -8   5  187.28   12.40
   2  -8  -5  189.28   13.50
   2  -8  -5  182.68   12.40
  -2   8   5  171.88   12.50
  -2   8   5  192.68   13.30
   2   8  -5  193.68   12.90
  -2   8   5  172.88   12.20
  -2   8   5  182.68   12.60
  -2   8   5  185.68   12.10
   0  -8  -5 3304.87  192.08
   0  -8   5 3106.49  191.68
   0  -8   5 3285.47  192.38
   0  -8   5 2914.91  191.78
   0  -8  -5 3175.38  191.78
   0  -8  -5 3166.08  192.88
   0  -8   5 2898.71  191.38
   0  -8   5 2919.11  191.18
   0  -8   5 2973.90  191.58
   0  -8  -5 3081.59  191.18
   0  -8   5 3173.28  193.28
   0  -8  -5 2958.10  192.18
   0   8   5 3232.68  193.58
   0   8  -5 3287.37  192.18
   0   8   5 3119.59  192.28
   0   8  -5 3203.78  191.58
   0   8  -5 2694.23  191.08
   0   8   5 3185.88  192.38
   0   8  -5 3041.70  191.68
   0   8   5 2970.70  191.18
  -2  -8  -5   76.69    9.10
   2  -8   5   68.89    5.50
  -2  -8  -5   81.79    8.40
   2  -8   5   61.69    7.20
  -2  -8  -5   76.09    6.40
  -2  -8  -5   76.49    5.60
  -2  -8  -5   75.69    7.30
   2   8   5   87.19    7.00
  -2   8  -5   64.99    6.90
  -2   8  -5   71.89    6.00
   2   8   5   76.49    9.60
  -2   8  -5   62.29    7.80
  -2   8  -5   83.89    6.20
  -2   8  -5   80.29    5.90
  -4  -8  -5 2309.17  145.99
  -4  -8  -5 2343.67  146.39
  -4  -8  -5 2421.46  146.09
  -4  -8  -5 2365.16  145.49
  -4  -8  -5 2653.63  148.79
  -4  -8  -5 2364.96  145.29
  -4  -8  -5 2469.75  146.79
  -4  -8  -5 2271.37  144.79
  -4   8  -5 2020.50  144.89
   4   8   5 2332.77  145.89
  -4   8  -5 2381.96  145.79
  -4   8  -5 2368.46  145.19
  -4   8  -5 2043.80  145.09
   4   8   5 2274.77  144.69
  -4   8  -5 2390.76  145.49
   4   8   5 2217.58  144.59
  -4   8  -5 2567.94  146.29
  -4   8  -5 2252.97  144.89
  -4   8  -5 2327.17  145.69
  -4   8  -5 2417.96  145.29
  -4   8  -5 2186.48  145.29
   4   8   5 2290.87  147.79
   4   8   5 2344.27  145.19
  -4   8  -5 2384.36  145.39
  -6  -8  -5  672.03   43.20
  -6  -8  -5  643.44   42.30
  -6  -8  -5  634.64   41.60
  -6  -8  -5  657.53   42.90
  -6   8  -5  675.73   41.30
  -6   8  -5  666.93   41.10
  -6   8  -5  627.34   41.30
  -6   8  -5  618.64   41.30
   6   8   5  620.24   40.60
  -6   8  -5  729.43   42.70
   6   8   5  655.43   41.30
  -6   8  -5  683.33   41.90
  -6   8  -5  594.84   40.90
   6   8   5  605.84   42.00
  -6   8  -5  611.94   41.40
  -6   8  -5  661.83   41.00
   6   8   5  618.44   40.70
  -6   8  -5  671.53   40.90
   6   8   5  631.14   40.60
  -6   8  -5  679.23   41.60
  -8  -8  -5  643.94   43.50
  -8  -8  -5  643.74   41.70
  -8  -8  -5  642.04   43.20
  -8   8  -5  699.83   41.80
  -8   8  -5  693.33   42.20
  -8   8  -5  615.44   41.90
  -8   8  -5  692.63   41.60
   8   8   5  554.94   42.60
  -8   8  -5  663.73   42.10
   8   8   5  655.23   41.40
  -8   8  -5  735.33   42.20
  -8   8  -5  699.43   42.60
   8   8   5  693.63   42.10
  -8   8  -5  678.83   43.20
   8   8   5  593.04   41.40
 -10  -8  -5   56.29    5.70
 -10  -8  -5   52.79    4.30
  10   8   5   54.99    4.10
 -10   8  -5   61.09    4.90
 -10   8  -5   54.39    4.70
 -10   8  -5   51.39    4.60
 -10   8  -5   44.50    5.30
 -10   8  -5   62.19    4.60
  -9  -9   5   13.60    3.60
  -9  -9   5   10.30    3.90
  -9   9   5   18.40    2.50
  -9   9   5   20.50    2.80
  -9   9   5   11.10    3.80
   9   9  -5   13.40    2.70
  -9   9   5   22.10    3.00
  -7  -9   5  171.98   12.50
  -7  -9   5  149.69   11.90
  -7  -9   5  175.28   13.10
   7  -9  -5  176.18   11.60
  -7  -9   5  173.18   12.70
   7  -9  -5  159.58   14.90
  -7  -9   5  185.38   12.10
  -7   9   5  165.38   11.60
  -7   9   5  181.58   17.00
  -7   9   5  148.99   11.20
  -7   9   5  157.58   11.70
  -7   9   5  175.58   13.90
[truncated: 694,897 more chars]
