# Supplementary material for: Supramolecular Assemblies in Pyridine- and Pyrazole-Based Coordination Compounds of Co(II) and Ni(II): Characterization, Hirshfeld Analysis and Theoretical Studies
Source: MDPI journal article supplement (doi:10.3390/cryst13020203), 2023-01-23
Supplement: s1 [file s1 › shelx_tables.html]

shelx


# shelx

b"\n \n \n "

Table 1 Crystal data and structure refinement for shelx.

| Identification code | shelx |
| Empirical formula | C20H36Cl2CoN8O2 |
| Formula weight | 550.40 |
| Temperature/K | 100.00 |
| Crystal system | monoclinic |
| Space group | C2/c |
| a/Å | 10.4681(7) |
| b/Å | 14.1306(10) |
| c/Å | 18.4697(13) |
| α/° | 90 |
| β/° | 92.765(3) |
| γ/° | 90 |
| Volume/Å3 | 2728.9(3) |
| Z | 4 |
| ρcalcg/cm3 | 1.340 |
| μ/mm‑1 | 6.991 |
| F(000) | 1156.0 |
| Crystal size/mm3 | 0.21 × 0.18 × 0.07 |
| Radiation | CuKα (λ = 1.54178) |
| 2Θ range for data collection/° | 10.524 to 136.818 |
| Index ranges | -12 ≤ h ≤ 12, -16 ≤ k ≤ 16, -22 ≤ l ≤ 22 |
| Reflections collected | 36237 |
| Independent reflections | 2504 [Rint = 0.0518, Rsigma = 0.0227] |
| Data/restraints/parameters | 2504/0/170 |
| Goodness-of-fit on F2 | 1.153 |
| Final R indexes [I>=2σ (I)] | R1 = 0.0758, wR2 = 0.1799 |
| Final R indexes [all data] | R1 = 0.0772, wR2 = 0.1806 |
| Largest diff. peak/hole / e Å-3 | 1.33/-1.44 |

Table 2 Fractional Atomic Coordinates (×104) and Equivalent Isotropic Displacement Parameters (Å2×103) for shelx. Ueq is defined as 1/3 of the trace of the orthogonalised UIJ tensor.

| Atom | *x* | *y* | *z* | U(eq) |
| --- | --- | --- | --- | --- |
| Co1 | 5000 | 5856.2(9) | 7500 | 18.1(4) |
| O1W | 5000 | 4387(4) | 7500 | 19.3(12) |
| O2W | 5000 | 7315(4) | 7500 | 30.3(14) |
| N1 | 3460(4) | 5883(3) | 6720(3) | 19.5(10) |
| N2 | 2500(4) | 5240(3) | 6790(3) | 22.3(11) |
| N6 | 6345(4) | 5845(3) | 6689(3) | 19.7(10) |
| N7 | 7214(5) | 6561(3) | 6683(3) | 25.5(11) |
| C3 | 1632(6) | 5272(5) | 6231(4) | 30.4(14) |
| C4 | 2025(6) | 5969(4) | 5775(3) | 29.2(14) |
| C5 | 3169(6) | 6338(4) | 6094(3) | 21.9(12) |
| C8 | 7833(6) | 6596(5) | 6064(3) | 29.9(14) |
| C9 | 7368(6) | 5854(5) | 5646(4) | 32.7(15) |
| C10 | 6438(6) | 5400(4) | 6051(3) | 22.9(12) |
| C31 | 500(7) | 4617(5) | 6187(4) | 46(2) |
| C51 | 3963(6) | 7117(4) | 5815(3) | 25.9(13) |
| C81 | 8828(8) | 7339(5) | 5939(5) | 49(2) |
| C101 | 5664(6) | 4553(4) | 5839(3) | 27.1(13) |
| Cl1 | 2489.0(13) | 8358.5(10) | 7246.2(8) | 28.3(4) |

Table 3 Anisotropic Displacement Parameters (Å2×103) for shelx. The Anisotropic displacement factor exponent takes the form: -2π2[h2a\*2U11+2hka\*b\*U12+…].

| Atom | U11 | U22 | U33 | U23 | U13 | U12 |
| --- | --- | --- | --- | --- | --- | --- |
| Co1 | 14.5(6) | 14.1(7) | 25.6(7) | 0 | -0.6(5) | 0 |
| O1W | 16(3) | 6(2) | 37(3) | 0 | 0(2) | 0 |
| O2W | 26(3) | 20(3) | 45(4) | 0 | -1(3) | 0 |
| N1 | 20(2) | 13(2) | 26(2) | 0.0(18) | 0.9(19) | 0.5(19) |
| N2 | 17(2) | 18(2) | 31(3) | 5(2) | -3.8(19) | -3.3(19) |
| N6 | 17(2) | 14(2) | 28(3) | 0.1(19) | -0.9(19) | -3.1(18) |
| N7 | 26(3) | 21(2) | 30(3) | -3(2) | 3(2) | -3(2) |
| C3 | 25(3) | 29(3) | 36(3) | 4(3) | -10(3) | -6(3) |
| C4 | 31(3) | 25(3) | 30(3) | 5(3) | -10(3) | -6(3) |
| C5 | 25(3) | 15(3) | 25(3) | 0(2) | -2(2) | 4(2) |
| C8 | 28(3) | 26(3) | 36(3) | 3(3) | 9(3) | -4(3) |
| C9 | 39(4) | 29(3) | 30(3) | 1(3) | 10(3) | 4(3) |
| C10 | 24(3) | 18(3) | 26(3) | 2(2) | 1(2) | 6(2) |
| C31 | 35(4) | 45(4) | 56(5) | 14(4) | -18(3) | -19(3) |
| C51 | 32(3) | 20(3) | 26(3) | 3(2) | 2(2) | -2(3) |
| C81 | 55(5) | 40(4) | 55(5) | -1(4) | 30(4) | -12(4) |
| C101 | 33(3) | 22(3) | 26(3) | -3(2) | -4(3) | 3(3) |
| Cl1 | 25.9(7) | 23.6(7) | 35.0(8) | -1.6(6) | -1.7(6) | 10.1(6) |

Table 4 Bond Lengths for shelx.

| Atom | Atom | Length/Å |  | Atom | Atom | Length/Å |
| --- | --- | --- | --- | --- | --- | --- |
| Co1 | O1W | 2.076(5) |  | N6 | C10 | 1.342(7) |
| Co1 | O2W | 2.062(6) |  | N7 | C8 | 1.343(8) |
| Co1 | N11 | 2.110(5) |  | C3 | C4 | 1.372(9) |
| Co1 | N1 | 2.110(5) |  | C3 | C31 | 1.502(9) |
| Co1 | N6 | 2.105(5) |  | C4 | C5 | 1.410(8) |
| Co1 | N61 | 2.105(5) |  | C5 | C51 | 1.486(8) |
| N1 | N2 | 1.366(6) |  | C8 | C9 | 1.377(9) |
| N1 | C5 | 1.345(7) |  | C8 | C81 | 1.504(9) |
| N2 | C3 | 1.342(7) |  | C9 | C10 | 1.410(9) |
| N6 | N7 | 1.361(6) |  | C10 | C101 | 1.488(8) |

11-X,+Y,3/2-Z

Table 5 Bond Angles for shelx.

| Atom | Atom | Atom | Angle/˚ |  | Atom | Atom | Atom | Angle/˚ |
| --- | --- | --- | --- | --- | --- | --- | --- | --- |
| O1W | Co1 | N1 | 91.03(13) |  | N7 | N6 | Co1 | 118.1(4) |
| O1W | Co1 | N11 | 91.03(12) |  | C10 | N6 | Co1 | 135.0(4) |
| O1W | Co1 | N6 | 89.57(13) |  | C10 | N6 | N7 | 105.3(5) |
| O1W | Co1 | N61 | 89.57(13) |  | C8 | N7 | N6 | 112.6(5) |
| O2W | Co1 | O1W | 180.0 |  | N2 | C3 | C4 | 106.5(5) |
| O2W | Co1 | N11 | 88.97(13) |  | N2 | C3 | C31 | 121.6(6) |
| O2W | Co1 | N1 | 88.97(12) |  | C4 | C3 | C31 | 131.9(6) |
| O2W | Co1 | N61 | 90.43(13) |  | C3 | C4 | C5 | 106.4(5) |
| O2W | Co1 | N6 | 90.43(13) |  | N1 | C5 | C4 | 109.6(5) |
| N11 | Co1 | N1 | 177.9(3) |  | N1 | C5 | C51 | 123.0(5) |
| N6 | Co1 | N1 | 91.70(18) |  | C4 | C5 | C51 | 127.4(5) |
| N61 | Co1 | N11 | 91.70(18) |  | N7 | C8 | C9 | 106.1(5) |
| N61 | Co1 | N1 | 88.32(18) |  | N7 | C8 | C81 | 121.5(6) |
| N6 | Co1 | N11 | 88.31(18) |  | C9 | C8 | C81 | 132.4(6) |
| N6 | Co1 | N61 | 179.1(3) |  | C8 | C9 | C10 | 106.5(6) |
| N2 | N1 | Co1 | 117.8(3) |  | N6 | C10 | C9 | 109.5(5) |
| C5 | N1 | Co1 | 136.8(4) |  | N6 | C10 | C101 | 123.1(5) |
| C5 | N1 | N2 | 105.2(5) |  | C9 | C10 | C101 | 127.3(6) |
| C3 | N2 | N1 | 112.3(5) |  |  |  |  |  |

11-X,+Y,3/2-Z

Table 6 Torsion Angles for shelx.

| A | B | C | D | Angle/˚ |  | A | B | C | D | Angle/˚ |
| --- | --- | --- | --- | --- | --- | --- | --- | --- | --- | --- |
| Co1 | N1 | N2 | C3 | -174.7(4) |  | N6 | N7 | C8 | C81 | 179.4(6) |
| Co1 | N1 | C5 | C4 | 173.5(4) |  | N7 | N6 | C10 | C9 | -0.5(6) |
| Co1 | N1 | C5 | C51 | -7.3(9) |  | N7 | N6 | C10 | C101 | 178.8(5) |
| Co1 | N6 | N7 | C8 | -166.6(4) |  | N7 | C8 | C9 | C10 | 0.9(7) |
| Co1 | N6 | C10 | C9 | 164.0(4) |  | C3 | C4 | C5 | N1 | -0.1(7) |
| Co1 | N6 | C10 | C101 | -16.6(9) |  | C3 | C4 | C5 | C51 | -179.2(6) |
| N1 | N2 | C3 | C4 | -0.5(7) |  | C5 | N1 | N2 | C3 | 0.5(6) |
| N1 | N2 | C3 | C31 | 179.1(6) |  | C8 | C9 | C10 | N6 | -0.2(7) |
| N2 | N1 | C5 | C4 | -0.2(6) |  | C8 | C9 | C10 | C101 | -179.5(6) |
| N2 | N1 | C5 | C51 | 178.9(5) |  | C10 | N6 | N7 | C8 | 1.1(6) |
| N2 | C3 | C4 | C5 | 0.4(7) |  | C31 | C3 | C4 | C5 | -179.3(7) |
| N6 | N7 | C8 | C9 | -1.3(7) |  | C81 | C8 | C9 | C10 | -179.9(7) |

Table 7 Hydrogen Atom Coordinates (Å×104) and Isotropic Displacement Parameters (Å2×103) for shelx.

| Atom | *x* | *y* | *z* | U(eq) |
| --- | --- | --- | --- | --- |
| H1W | 4210(60) | 3960(50) | 7540(30) | 29 |
| H2W | 4290(70) | 7670(60) | 7360(40) | 45 |
| H2 | 2454.71 | 4849.1 | 7158.69 | 70(30) |
| H7 | 7354.34 | 6957.83 | 7045.31 | 12(14) |
| H4 | 1607.31 | 6164.41 | 5331.98 | 40(20) |
| H9 | 7623.43 | 5681.04 | 5177.58 | 40(20) |
| H31A | 754.58 | 3994.57 | 6378.94 | 69 |
| H31B | 189.14 | 4552.57 | 5680.81 | 80(30) |
| H31C | -181.43 | 4876.66 | 6473.96 | 126 |
| H51A | 3664.02 | 7723.68 | 6001.31 | 39 |
| H51B | 3888.67 | 7121.88 | 5284.54 | 36(19) |
| H51C | 4858.7 | 7019.71 | 5976.71 | 55 |
| H81A | 8577.76 | 7934.86 | 6163.9 | 73 |
| H81B | 8898.59 | 7435.32 | 5416.56 | 80(30) |
| H81C | 9654.96 | 7131.97 | 6153.87 | 113 |
| H10A | 6049.64 | 3988.73 | 6066.56 | 41 |
| H10B | 5640.37 | 4481.6 | 5310.46 | 31(18) |
| H10C | 4791.11 | 4631.78 | 5998.87 | 46 |

Experimental

Single crystals of C20H36Cl2CoN8O2
[shelx]
were
[].
A suitable crystal was selected and
[]
on a
D8 Venture
diffractometer. The crystal was kept at 100.00 K during data collection.
Using Olex2 [1], the structure was solved with the
XT
[2] structure solution program using
Intrinsic Phasing
and refined with the
XL
[3] refinement package using
Least Squares
minimisation.

1. Dolomanov, O.V., Bourhis, L.J., Gildea, R.J, Howard, J.A.K. & Puschmann, H.
   (2009), J. Appl. Cryst. 42, 339-341.
2. Sheldrick, G.M. (2015). Acta Cryst. A71, 3-8.
3. Sheldrick, G.M. (2008). Acta Cryst. A64, 112-122.

Crystal structure determination of
[shelx]

**Crystal Data**
for C20H36Cl2CoN8O2 (*M*=550.40 g/mol):
monoclinic, space group C2/c (no. 15),
*a* = 10.4681(7) Å, *b* = 14.1306(10) Å, *c* = 18.4697(13) Å, *β* = 92.765(3)°,
*V*= 2728.9(3) Å3,
*Z* = 4,
*T* = 100.00 K,
μ(CuKα) = 6.991 mm-1,
*Dcalc* = 1.340 g/cm3,
36237 reflections measured (10.524° ≤ 2Θ ≤ 136.818°),
2504 unique (*R*int = 0.0518, Rsigma = 0.0227) which were used in all calculations.
The final *R*1 was 0.0758
(I > 2σ(I)) and *wR*2 was 0.1806 (all data).

Refinement model description

Number of restraints - 0,
number of constraints - unknown.

Details:

```
1. Fixed Uiso
```

This report has been created with Olex2, compiled on
2022.04.07 svn.rca3783a0 for OlexSys. Please
let us know
if there are any errors or if you would like to have additional features.
