# Supplementary figures and images for: Supramolecular Assemblies in Pyridine- and Pyrazole-Based Coordination Compounds of Co(II) and Ni(II): Characterization, Hirshfeld Analysis and Theoretical Studies
Source: MDPI journal article supplement (doi:10.3390/cryst13020203), 2023-01-23

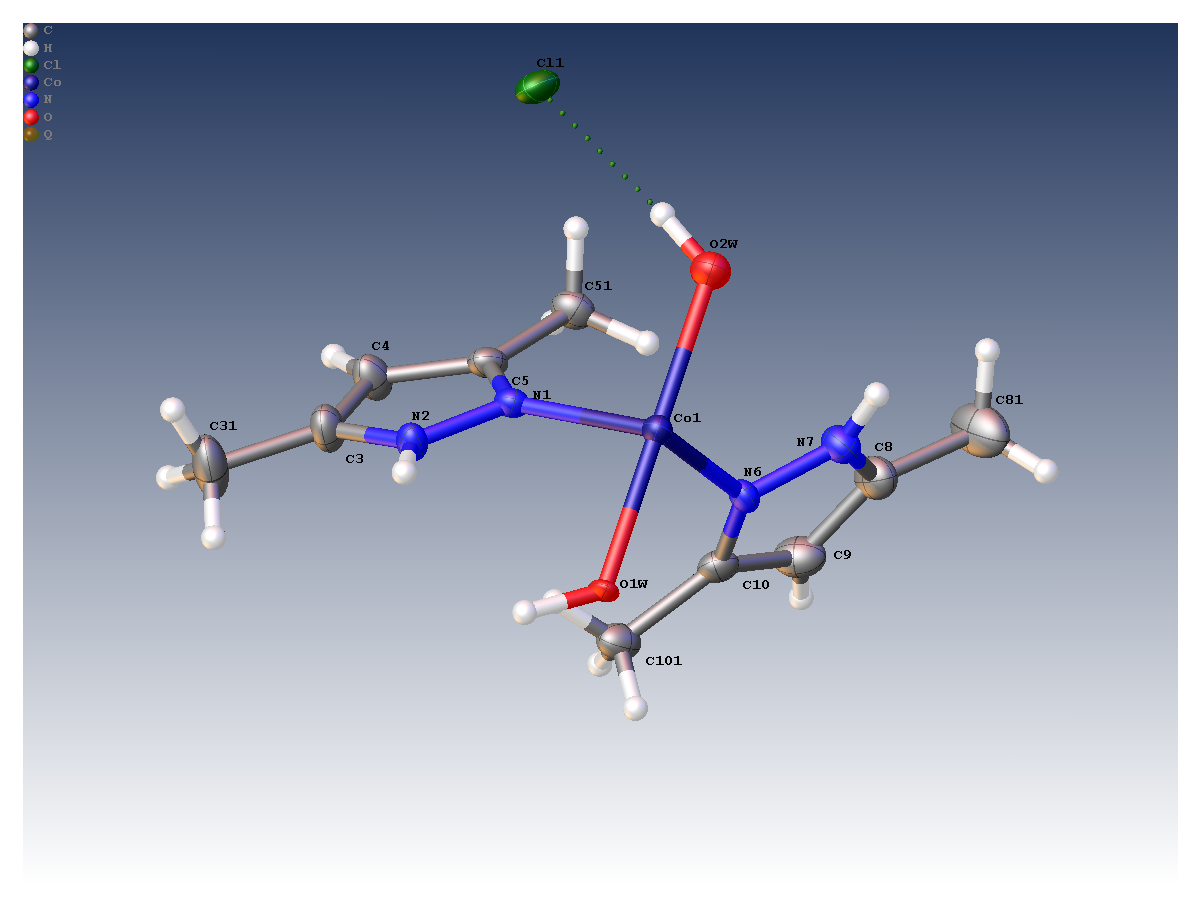

Supplement: s1 [file s1 › shelx.png]
